# Supplementary material for: Macroeconomic Imbalances and Financial Stress Among BRICS: Analysis of Frequency-Dependent and Asymmetric Causal Nexuses
Source: publisher site journal article supplement (doi:10.1515/snde-2024-0045), 2025-04-16
Supplement: Supplementary file 1 [file DATA.xlsx]

## Sheet: %
date	FSI	CA
1998-01-01	0.240982	0.221903
1998-04-01	0.358442	0.510229
1998-07-01	-0.258722	-0.360304
1998-10-01	-0.0197571	0.187464
1999-01-01	-0.0133331	-0.297784
1999-04-01	0.0339631	0.171949
1999-07-01	0.0933727	0.0096416
1999-10-01	-0.347709	-0.0991572
2000-01-01	0.3526	0.314586
2000-04-01	0.238382	-0.372808
2000-07-01	-0.40884	0.413731
2000-10-01	0.178811	-0.38223
2001-01-01	0.177404	0.139181
2001-04-01	-0.0639255	0.0555433
2001-07-01	-0.073815	-0.300656
2001-10-01	-0.284281	0.148775
2002-01-01	0.203968	0.681232
2002-04-01	0.326848	-0.866627
2002-07-01	-0.354673	0.501799
2002-10-01	-0.0678313	0.530387
2003-01-01	0.277019	-0.039023
2003-04-01	-0.131235	-0.241471
2003-07-01	-0.0878664	-0.0173956
2003-10-01	0.0486023	0.122919
2004-01-01	-0.128128	-0.138116
2004-04-01	0.248788	-0.0377172
2004-07-01	-0.00566498	0.183688
2004-10-01	-0.256189	-0.0887172
2005-01-01	0.052015	0.0278555
2005-04-01	-0.0307253	-0.185212
2005-07-01	0.176848	0.111382
2005-10-01	0.0255501	0.13219
2006-01-01	-0.172541	0.170199
2006-04-01	0.19172	-0.527393
2006-07-01	-0.183761	0.375342
2006-10-01	-0.0406706	0.0673395
2007-01-01	-0.107423	-0.114494
2007-04-01	0.473483	0.0917987
2007-07-01	0.164757	-0.206079
2007-10-01	-0.683263	0.375026
2008-01-01	0.676954	-0.372344
2008-04-01	-0.402118	0.240259
2008-07-01	-0.384337	-0.291638
2008-10-01	0.16637	0.253693
2009-01-01	0.0684322	-0.206395
2009-04-01	-0.0875317	0.153144
2009-07-01	0.0946669	0.0983609
2009-10-01	-0.0854872	0.434819
2010-01-01	-0.0120655	-0.575423
2010-04-01	0.205096	0.228265
2010-07-01	-0.241195	-0.275001
2010-10-01	0.0281744	0.320524
2011-01-01	0.197249	-0.0331353
2011-04-01	-0.171962	-0.0540787
2011-07-01	0.153865	0.191627
2011-10-01	-0.174472	-0.327934
2012-01-01	0.18871	0.36343
2012-04-01	-0.137757	-0.342749
2012-07-01	-0.0419639	0.506636
2012-10-01	0.19411	-0.604364
2013-01-01	-0.0686386	0.367928
2013-04-01	-0.131151	0.289791
2013-07-01	0.204946	-0.471775
2013-10-01	-0.181958	0.456367
2014-01-01	0.0368899	-0.44182
2014-04-01	-0.034197	0.255706
2014-07-01	-0.17066	0.239974
2014-10-01	-0.457245	-0.223053
2015-01-01	0.671827	-0.33305
2015-04-01	-0.637013	0.217786
2015-07-01	-0.0687741	0.0770862
2015-10-01	0.075959	0.0718252
2016-01-01	-0.0123479	-0.0255194
2016-04-01	0.224583	0.0670256
2016-07-01	0.0419987	0.258328
2016-10-01	-0.264295	-0.671253
2017-01-01	0.23115	0.564567
2017-04-01	-0.0659016	0.202693
2017-07-01	0.0569789	-0.28108
2017-10-01	-0.126305	-0.184608
2018-01-01	0.1228	0.0614086
2018-04-01	0.133165	0.427649
2018-07-01	-0.373277	-0.600967
2018-10-01	0.078473	-0.0255791
2019-01-01	0.377009	0.729224
2019-04-01	-0.273839	0.318791
2019-07-01	0.0625576	-1.03654
2019-10-01	-0.152258	-0.785367
2020-01-01	-0.130691	-1.22572
2020-04-01	-0.125472	1.98743
2020-07-01	0.334839	1.40897
2020-10-01	0.0272748	-1.4044
2021-01-01	-0.209473	-2.58006
2021-04-01	-0.00394158	2.66441
2021-07-01	-0.0246408	1.04213
2021-10-01	0.122638	-2.30622
