# Supplementary material for: Macroeconomic Imbalances and Financial Stress Among BRICS: Analysis of Frequency-Dependent and Asymmetric Causal Nexuses
Source: publisher site journal article supplement (doi:10.1515/snde-2024-0045), 2025-04-16
Supplement: Supplementary file 3 [file Brazil.xlsx]

## Sheet: CA
0.221903	0.510229	-0.360304	0.187464	-0.297784	0.171949	0.0096416	-0.0991572	0.314586	-0.372808	0.413731	-0.38223	0.139181	0.0555433	-0.300656	0.148775	0.681232	-0.866627	0.501799	0.530387	-0.039023	-0.241471	-0.0173956	0.122919	-0.138116	-0.0377172	0.183688	-0.0887172	0.0278555	-0.185212	0.111382	0.13219	0.170199	-0.527393	0.375342	0.0673395	-0.114494	0.0917987	-0.206079	0.375026	-0.372344	0.240259	-0.291638	0.253693	-0.206395	0.153144	0.0983609	0.434819	-0.575423	0.228265
0.415425	0.530456	0.145236	-0.375905	-0.589856	-0.415363	-0.0310739	0.345057	0.539004	0.46779	0.161743	-0.233258	-0.420713	-0.357029	-0.203737	-0.164474	-0.284748	-0.296921	0.0547754	0.398189	0.385058	0.0953041	-0.190454	-0.296451	-0.18491	0.0670803	0.218592	0.109364	-0.0761945	-0.0946109	0.00636869	-0.0116481	-0.16133	-0.136809	0.190931	0.456701	0.427046	0.185197	-0.132588	-0.513089	-0.871944	-0.936687	-0.576992	0.0890723	0.749254	1.08766	0.898308	0.169265	-0.636365	-0.86255
0.440601	0.577966	0.718239	0.847141	0.945618	0.994606	0.978759	0.883251	0.69475	0.411482	0.0633402	-0.300066	-0.623979	-0.853673	-0.947177	-0.88607	-0.684787	-0.393088	-0.0729007	0.219806	0.437376	0.560586	0.601096	0.578896	0.51234	0.413401	0.290639	0.153661	0.0212244	-0.0824986	-0.134414	-0.124108	-0.0667171	0.00256069	0.0528224	0.0713265	0.0552498	0.0137036	-0.0375748	-0.080876	-0.101187	-0.0888945	-0.0478478	0.0020145	0.0377102	0.0378515	-0.00922257	-0.0834444	-0.153019	-0.185165
-1.71347	-1.92726	-2.11387	-2.27119	-2.39653	-2.48655	-2.53757	-2.54647	-2.51173	-2.43327	-2.31189	-2.14863	-1.94473	-1.70174	-1.42209	-1.11003	-0.77266	-0.4182	-0.0549755	0.308683	0.664451	1.00401	1.31907	1.60161	1.84434	2.04156	2.18988	2.28824	2.33764	2.34014	2.29803	2.21389	2.09172	1.93702	1.75568	1.55327	1.335	1.10579	0.870311	0.633127	0.398743	0.171335	-0.0455967	-0.249363	-0.437815	-0.609343	-0.763019	-0.898358	-1.01519	-1.11363
-1.11909	-1.04103	-0.960458	-0.877612	-0.792743	-0.706101	-0.617942	-0.528546	-0.438248	-0.34743	-0.256499	-0.165875	-0.0759906	0.012718	0.0998109	0.184847	0.267384	0.346982	0.423199	0.495595	0.563727	0.627154	0.685436	0.738131	0.784797	0.824994	0.858281	0.884215	0.902363	0.912362	0.914168	0.90815	0.894784	0.874559	0.847964	0.815487	0.777619	0.734846	0.687659	0.636547	0.581998	0.524502	0.464547	0.402623	0.339218	0.274827	0.209947	0.145086	0.0807597	0.0174993
-1.93855	-1.93077	-1.92323	-1.91593	-1.90891	-1.90217	-1.89572	-1.88959	-1.88379	-1.87834	-1.87325	-1.86853	-1.86421	-1.86029	-1.8568	-1.85375	-1.85115	-1.84902	-1.84738	-1.84624	-1.84562	-1.84553	-1.84599	-1.84702	-1.84863	-1.85083	-1.85364	-1.85709	-1.86117	-1.86591	-1.87133	-1.87741	-1.88416	-1.89154	-1.89956	-1.90818	-1.91739	-1.92718	-1.93753	-1.94842	-1.95983	-1.97176	-1.98418	-1.99707	-2.01042	-2.02422	-2.03844	-2.05307	-2.0681	-2.0835
IMF1	IMF2	IMF3	IMF4	IMF5	Residual
0.221903	0.415425	0.440601	-1.71347	-1.11909	-1.93855
0.510229	0.530456	0.577966	-1.92726	-1.04103	-1.93077
-0.360304	0.145236	0.718239	-2.11387	-0.960458	-1.92323
0.187464	-0.375905	0.847141	-2.27119	-0.877612	-1.91593
-0.297784	-0.589856	0.945618	-2.39653	-0.792743	-1.90891
0.171949	-0.415363	0.994606	-2.48655	-0.706101	-1.90217
0.0096416	-0.0310739	0.978759	-2.53757	-0.617942	-1.89572
-0.0991572	0.345057	0.883251	-2.54647	-0.528546	-1.88959
0.314586	0.539004	0.69475	-2.51173	-0.438248	-1.88379
-0.372808	0.46779	0.411482	-2.43327	-0.34743	-1.87834
0.413731	0.161743	0.0633402	-2.31189	-0.256499	-1.87325
-0.38223	-0.233258	-0.300066	-2.14863	-0.165875	-1.86853
0.139181	-0.420713	-0.623979	-1.94473	-0.0759906	-1.86421
0.0555433	-0.357029	-0.853673	-1.70174	0.012718	-1.86029
-0.300656	-0.203737	-0.947177	-1.42209	0.0998109	-1.8568
0.148775	-0.164474	-0.88607	-1.11003	0.184847	-1.85375
0.681232	-0.284748	-0.684787	-0.77266	0.267384	-1.85115
-0.866627	-0.296921	-0.393088	-0.4182	0.346982	-1.84902
0.501799	0.0547754	-0.0729007	-0.0549755	0.423199	-1.84738
0.530387	0.398189	0.219806	0.308683	0.495595	-1.84624
-0.039023	0.385058	0.437376	0.664451	0.563727	-1.84562
-0.241471	0.0953041	0.560586	1.00401	0.627154	-1.84553
-0.0173956	-0.190454	0.601096	1.31907	0.685436	-1.84599
0.122919	-0.296451	0.578896	1.60161	0.738131	-1.84702
-0.138116	-0.18491	0.51234	1.84434	0.784797	-1.84863
-0.0377172	0.0670803	0.413401	2.04156	0.824994	-1.85083
0.183688	0.218592	0.290639	2.18988	0.858281	-1.85364
-0.0887172	0.109364	0.153661	2.28824	0.884215	-1.85709
0.0278555	-0.0761945	0.0212244	2.33764	0.902363	-1.86117
-0.185212	-0.0946109	-0.0824986	2.34014	0.912362	-1.86591
0.111382	0.00636869	-0.134414	2.29803	0.914168	-1.87133
0.13219	-0.0116481	-0.124108	2.21389	0.90815	-1.87741
0.170199	-0.16133	-0.0667171	2.09172	0.894784	-1.88416
-0.527393	-0.136809	0.00256069	1.93702	0.874559	-1.89154
0.375342	0.190931	0.0528224	1.75568	0.847964	-1.89956
0.0673395	0.456701	0.0713265	1.55327	0.815487	-1.90818
-0.114494	0.427046	0.0552498	1.335	0.777619	-1.91739
0.0917987	0.185197	0.0137036	1.10579	0.734846	-1.92718
-0.206079	-0.132588	-0.0375748	0.870311	0.687659	-1.93753
0.375026	-0.513089	-0.080876	0.633127	0.636547	-1.94842
-0.372344	-0.871944	-0.101187	0.398743	0.581998	-1.95983
0.240259	-0.936687	-0.0888945	0.171335	0.524502	-1.97176
-0.291638	-0.576992	-0.0478478	-0.0455967	0.464547	-1.98418
0.253693	0.0890723	0.0020145	-0.249363	0.402623	-1.99707
-0.206395	0.749254	0.0377102	-0.437815	0.339218	-2.01042
0.153144	1.08766	0.0378515	-0.609343	0.274827	-2.02422
0.0983609	0.898308	-0.00922257	-0.763019	0.209947	-2.03844
0.434819	0.169265	-0.0834444	-0.898358	0.145086	-2.05307
-0.575423	-0.636365	-0.153019	-1.01519	0.0807597	-2.0681
0.228265	-0.86255	-0.185165	-1.11363	0.0174993	-2.0835
-0.275001	-0.455429	-0.155745	-1.19437	-0.0441537	-2.09926
0.320524	0.108104	-0.0725267	-1.25866	-0.103646	-2.11536
-0.0331353	0.417811	0.047158	-1.30813	-0.160418	-2.13179
-0.0540787	0.38969	0.179056	-1.34433	-0.213907	-2.14853
0.191627	0.21006	0.287069	-1.36872	-0.263567	-2.16557
-0.327934	0.1057	0.339281	-1.3828	-0.308886	-2.18288
0.36343	0.122032	0.330469	-1.38819	-0.349422	-2.20045
-0.342749	0.029152	0.286047	-1.38633	-0.384852	-2.21826
0.506636	-0.230894	0.233305	-1.37786	-0.415016	-2.2363
-0.604364	-0.309211	0.185353	-1.36171	-0.439899	-2.25455
0.367928	-0.0391385	0.13901	-1.33495	-0.459621	-2.273
0.289791	0.261894	0.07321	-1.2938	-0.474394	-2.29162
-0.471775	0.36593	-0.035376	-1.23462	-0.484468	-2.3104
0.456367	0.328323	-0.199922	-1.15528	-0.490106	-2.32933
-0.44182	0.300185	-0.407607	-1.05536	-0.491571	-2.34838
0.255706	0.180978	-0.612616	-0.93538	-0.489126	-2.36754
0.239974	-0.152983	-0.760274	-0.796241	-0.483024	-2.3868
-0.223053	-0.545443	-0.801632	-0.639541	-0.473507	-2.40614
-0.33305	-0.603961	-0.699768	-0.468583	-0.460808	-2.42553
0.217786	-0.212419	-0.461077	-0.288646	-0.445156	-2.44497
0.0770862	0.291332	-0.134294	-0.10557	-0.426773	-2.46444
0.0718252	0.550733	0.223578	0.0747787	-0.405883	-2.48391
-0.0255194	0.440398	0.55942	0.246536	-0.382711	-2.50339
0.0670256	0.0546672	0.832732	0.40384	-0.35748	-2.52284
0.258328	-0.323151	1.00903	0.540831	-0.33041	-2.54225
-0.671253	-0.334862	1.06256	0.651854	-0.301715	-2.5616
0.564567	0.0148228	0.989297	0.732796	-0.271579	-2.58089
0.202693	0.232663	0.797291	0.783441	-0.240144	-2.60008
-0.28108	0.155639	0.501705	0.805953	-0.207516	-2.61917
-0.184608	-0.00626109	0.13597	0.802924	-0.173817	-2.63813
0.0614086	-0.0925361	-0.258308	0.77703	-0.139247	-2.65696
0.427649	-0.132645	-0.635893	0.731044	-0.104107	-2.67564
-0.600967	-0.0699229	-0.952024	0.667811	-0.0687638	-2.69414
-0.0255791	0.154229	-1.16272	0.590208	-0.0336204	-2.71245
0.729224	0.288769	-1.2259	0.501114	0.000910013	-2.73056
0.318791	0.0227591	-1.11721	0.403481	0.0344088	-2.74844
-1.03654	-0.465325	-0.858235	0.300663	0.0664602	-2.76609
-0.785367	-0.586711	-0.491696	0.196213	0.0966585	-2.78348
-1.22572	0.058569	-0.0742852	0.0937137	0.124605	-2.8006
1.98743	0.763641	0.336075	-0.00325967	0.149907	-2.81744
1.40897	0.82304	0.684867	-0.0911339	0.172173	-2.83397
-1.4044	0.318571	0.937651	-0.166363	0.191021	-2.85017
-2.58006	-0.369993	1.09677	-0.225532	0.206071	-2.86604
2.66441	-0.872279	1.17469	-0.265604	0.216936	-2.88156
1.04213	-0.97089	1.18631	-0.284611	0.223216	-2.8967
-2.30622	-0.742553	1.14594	-0.282625	0.224713	-2.91145
[truncated: 46 more columns]

## Sheet: CGD
-0.0173576	-0.00561126	0.000320827	0.00952076	0.000215141	-0.000824584	0.000210247	-0.00240277	0.000923787	0.00094419	-0.000197423	0.000376984	-0.000126981	-0.00128259	-0.00122648	0.0038005	-0.00104663	-0.000887488	0.000109613	-0.000592313	0.00037985	0.000198722	-2.05301e-05	-4.23829e-05	5.48528e-05	9.52235e-05	5.3364e-05	-0.000346594	2.21698e-05	-5.84705e-05	-1.32165e-05	0.000718149	-0.00016664	-0.000280054	-0.000121289	-2.67168e-05	0.000216666	0.0001872	-0.000239701	-0.000117995	5.49345e-05	0.000482314	0.0005029	-0.00167445	0.000502423	-5.70667e-05	-0.000531158	0.0021752	-0.000591144	-0.000588743
-0.0169292	-0.00817113	0.00529492	0.0150311	0.0153039	0.00766428	-0.00181212	-0.00771512	-0.00868551	-0.00745213	-0.00632756	-0.00522324	-0.00311574	0.000595391	0.00505153	0.0073061	0.00523506	0.00082529	-0.00264686	-0.00361386	-0.00243735	-0.00059456	0.000594494	0.000944199	0.000711374	0.000234328	-0.000365511	-0.000765613	-0.000593612	2.65313e-05	0.000675992	0.000946671	0.000695877	8.03961e-05	-0.000454537	-0.000680452	-0.000513238	-5.383e-05	0.000696155	0.00146564	0.00149903	0.000207011	-0.00208275	-0.00370873	-0.00294335	-5.98083e-05	0.0030219	0.00411166	0.00264988	0.000279115
-0.0106945	-0.00984368	-0.00843152	-0.00708163	-0.00632523	-0.00632542	-0.0068599	-0.00748881	-0.00758218	-0.00646658	-0.0038377	6.74534e-05	0.00455694	0.00873441	0.0117233	0.0128279	0.0117895	0.0090145	0.00530316	0.00151271	-0.00167628	-0.00388436	-0.00501838	-0.00522947	-0.00478573	-0.00392427	-0.00279575	-0.00148314	-6.6028e-05	0.00134495	0.00258421	0.00348566	0.00394316	0.00391626	0.00342155	0.00252196	0.00128414	-0.0002356	-0.00195943	-0.00369917	-0.00513321	-0.00588278	-0.00559111	-0.00406503	-0.00144645	0.00171707	0.00464918	0.00656682	0.00697495	0.00589252
-0.00842543	-0.00834034	-0.00792938	-0.00719437	-0.0061511	-0.00483489	-0.00329943	-0.00161154	0.000156519	0.00193296	0.00364753	0.00523028	0.0066132	0.00773075	0.00851953	0.00892239	0.00890983	0.00850892	0.00778399	0.00680576	0.00564211	0.00435657	0.00300719	0.00164438	0.000310978	-0.000958994	-0.00214324	-0.00322981	-0.00421429	-0.00509859	-0.00588523	-0.00657109	-0.00714782	-0.00759962	-0.00790309	-0.00802859	-0.00794215	-0.00761104	-0.00700865	-0.00611828	-0.00493658	-0.00347802	-0.00178045	8.85345e-05	0.00203214	0.00393946	0.00569724	0.00719562	0.00833445	0.00903746
1.7892	1.79254	1.79609	1.79984	1.80377	1.80783	1.81196	1.81611	1.82021	1.8242	1.828	1.83156	1.83482	1.83769	1.84013	1.84207	1.84347	1.84432	1.84466	1.84453	1.84397	1.84304	1.84179	1.84028	1.83854	1.83663	1.83456	1.83237	1.83008	1.82769	1.82523	1.82269	1.82009	1.81744	1.81477	1.81207	1.80937	1.8067	1.80406	1.80148	1.79899	1.79661	1.79436	1.79223	1.79023	1.78833	1.78654	1.78482	1.78319	1.78161
IMF1	IMF2	IMF3	IMF4	Residual
-0.0173576	-0.0169292	-0.0106945	-0.00842543	1.7892
-0.00561126	-0.00817113	-0.00984368	-0.00834034	1.79254
0.000320827	0.00529492	-0.00843152	-0.00792938	1.79609
0.00952076	0.0150311	-0.00708163	-0.00719437	1.79984
0.000215141	0.0153039	-0.00632523	-0.0061511	1.80377
-0.000824584	0.00766428	-0.00632542	-0.00483489	1.80783
0.000210247	-0.00181212	-0.0068599	-0.00329943	1.81196
-0.00240277	-0.00771512	-0.00748881	-0.00161154	1.81611
0.000923787	-0.00868551	-0.00758218	0.000156519	1.82021
0.00094419	-0.00745213	-0.00646658	0.00193296	1.8242
-0.000197423	-0.00632756	-0.0038377	0.00364753	1.828
0.000376984	-0.00522324	6.74534e-05	0.00523028	1.83156
-0.000126981	-0.00311574	0.00455694	0.0066132	1.83482
-0.00128259	0.000595391	0.00873441	0.00773075	1.83769
-0.00122648	0.00505153	0.0117233	0.00851953	1.84013
0.0038005	0.0073061	0.0128279	0.00892239	1.84207
-0.00104663	0.00523506	0.0117895	0.00890983	1.84347
-0.000887488	0.00082529	0.0090145	0.00850892	1.84432
0.000109613	-0.00264686	0.00530316	0.00778399	1.84466
-0.000592313	-0.00361386	0.00151271	0.00680576	1.84453
0.00037985	-0.00243735	-0.00167628	0.00564211	1.84397
0.000198722	-0.00059456	-0.00388436	0.00435657	1.84304
-2.05301e-05	0.000594494	-0.00501838	0.00300719	1.84179
-4.23829e-05	0.000944199	-0.00522947	0.00164438	1.84028
5.48528e-05	0.000711374	-0.00478573	0.000310978	1.83854
9.52235e-05	0.000234328	-0.00392427	-0.000958994	1.83663
5.3364e-05	-0.000365511	-0.00279575	-0.00214324	1.83456
-0.000346594	-0.000765613	-0.00148314	-0.00322981	1.83237
2.21698e-05	-0.000593612	-6.6028e-05	-0.00421429	1.83008
-5.84705e-05	2.65313e-05	0.00134495	-0.00509859	1.82769
-1.32165e-05	0.000675992	0.00258421	-0.00588523	1.82523
0.000718149	0.000946671	0.00348566	-0.00657109	1.82269
-0.00016664	0.000695877	0.00394316	-0.00714782	1.82009
-0.000280054	8.03961e-05	0.00391626	-0.00759962	1.81744
-0.000121289	-0.000454537	0.00342155	-0.00790309	1.81477
-2.67168e-05	-0.000680452	0.00252196	-0.00802859	1.81207
0.000216666	-0.000513238	0.00128414	-0.00794215	1.80937
0.0001872	-5.383e-05	-0.0002356	-0.00761104	1.8067
-0.000239701	0.000696155	-0.00195943	-0.00700865	1.80406
-0.000117995	0.00146564	-0.00369917	-0.00611828	1.80148
5.49345e-05	0.00149903	-0.00513321	-0.00493658	1.79899
0.000482314	0.000207011	-0.00588278	-0.00347802	1.79661
0.0005029	-0.00208275	-0.00559111	-0.00178045	1.79436
-0.00167445	-0.00370873	-0.00406503	8.85345e-05	1.79223
0.000502423	-0.00294335	-0.00144645	0.00203214	1.79023
-5.70667e-05	-5.98083e-05	0.00171707	0.00393946	1.78833
-0.000531158	0.0030219	0.00464918	0.00569724	1.78654
0.0021752	0.00411166	0.00656682	0.00719562	1.78482
-0.000591144	0.00264988	0.00697495	0.00833445	1.78319
-0.000588743	0.000279115	0.00589252	0.00903746	1.78161
-7.04714e-05	-0.0011587	0.00376721	0.00926598	1.78011
-0.000184763	-0.00117802	0.00126724	0.00900926	1.77868
4.31656e-05	-0.000710076	-0.000899347	0.00827102	1.77733
0.000266797	-0.000785748	-0.00213957	0.00706641	1.77607
0.00023868	-0.00153538	-0.00213318	0.00543346	1.77491
-0.000921227	-0.0021598	-0.000916327	0.00344713	1.77391
0.000358706	-0.00152136	0.00111424	0.00121555	1.77312
-1.79217e-05	0.000470171	0.00327917	-0.00113493	1.77261
-0.000378246	0.00272096	0.00479035	-0.00347474	1.77248
0.00116128	0.00384629	0.00495418	-0.00568425	1.77278
-0.000318077	0.00316867	0.00341647	-0.00766486	1.7736
5.29814e-05	0.00134311	0.000306793	-0.0093377	1.77497
0.00041128	-0.000444627	-0.00381322	-0.0106364	1.77696
-0.00149215	-0.000923877	-0.00807478	-0.0114975	1.7796
0.00089148	-0.000605761	-0.0114505	-0.0118579	1.78294
0.00192582	-0.00203936	-0.0130004	-0.0116662	1.78701
0.00135302	-0.00550769	-0.0121733	-0.0109166	1.79178
-0.00460914	-0.00708775	-0.00897786	-0.00967326	1.79719
5.80326e-05	-0.00339216	-0.00403332	-0.0080344	1.80314
0.000435756	0.00317631	0.00158711	-0.00610295	1.80955
0.00342286	0.00707428	0.00672984	-0.0039823	1.8163
-0.00105052	0.00588595	0.0104336	-0.00177552	1.8233
-0.00111038	0.00196631	0.0123207	0.000416241	1.83046
-0.000155008	-0.00128493	0.012579	0.00250015	1.83766
0.00036737	-0.00276925	0.0117191	0.0044009	1.84484
0.000390724	-0.00287822	0.0103262	0.00606395	1.8519
6.25498e-05	-0.00192539	0.00882208	0.00745591	1.85881
-0.000482735	-0.000322723	0.00736957	0.00856928	1.86551
-0.00049611	0.00123814	0.00591931	0.00942052	1.87197
0.00107013	0.00188612	0.00427282	0.0100429	1.8782
-0.000281493	0.00124649	0.00223958	0.0104779	1.88418
-0.000245453	5.83816e-05	-0.000243558	0.0107701	1.88991
1.04574e-05	-0.000670174	-0.00305438	0.0109596	1.8954
-0.000107752	-0.000647946	-0.00591525	0.0110779	1.90063
0.000113076	-0.000270972	-0.00845476	0.0111502	1.90559
0.000243809	-0.000197111	-0.0103005	0.011198	1.91028
0.000184448	-0.000646725	-0.0111366	0.0112383	1.91468
-0.000761366	-0.00111285	-0.0107724	0.0112842	1.91878
0.000200996	-0.00105138	-0.00917003	0.0113375	1.92256
0.000170022	-0.000758528	-0.00645979	0.0113889	1.92599
0.00013153	-0.000859773	-0.00296024	0.0114218	1.92905
0.000293598	-0.00102794	0.000838878	0.0114143	1.93172
-0.000282991	-0.000214756	0.00434506	0.0113401	1.93398
-0.000897487	0.00207126	0.00693954	0.0111688	1.93581
0.000713804	0.00413184	0.00809448	0.0108683	1.93721
0.00698511	0.00382368	0.00753874	0.0104161	1.93818
[truncated: 46 more columns]

## Sheet: FSI
0.240982	0.358442	-0.258722	-0.0197571	-0.0133331	0.0339631	0.0933727	-0.347709	0.3526	0.238382	-0.40884	0.178811	0.177404	-0.0639255	-0.073815	-0.284281	0.203968	0.326848	-0.354673	-0.0678313	0.277019	-0.131235	-0.0878664	0.0486023	-0.128128	0.248788	-0.00566498	-0.256189	0.052015	-0.0307253	0.176848	0.0255501	-0.172541	0.19172	-0.183761	-0.0406706	-0.107423	0.473483	0.164757	-0.683263	0.676954	-0.402118	-0.384337	0.16637	0.0684322	-0.0875317	0.0946669	-0.0854872	-0.0120655	0.205096
0.282099	0.379333	0.108562	-0.212582	-0.337656	-0.299458	-0.146777	0.104561	0.301906	0.253854	0.0333872	-0.138025	-0.228458	-0.27975	-0.229071	0.0112311	0.277841	0.326556	0.127712	-0.102327	-0.238769	-0.270854	-0.198095	-0.0107752	0.187713	0.212278	0.00484425	-0.19862	-0.148516	0.0866032	0.252452	0.215583	0.0403993	-0.175513	-0.364159	-0.404017	-0.278934	-0.128394	0.0580808	0.328341	0.533928	0.349072	-0.052959	-0.371333	-0.452339	-0.351985	-0.156572	0.0667783	0.253778	0.313611
-0.130817	-0.138965	-0.184535	-0.249581	-0.31087	-0.348635	-0.352947	-0.324429	-0.265444	-0.178693	-0.0735938	0.0343638	0.137228	0.230682	0.303051	0.34141	0.332127	0.263096	0.13927	-0.0093744	-0.147094	-0.239948	-0.266498	-0.229791	-0.145574	-0.0320412	0.0873002	0.177246	0.207456	0.178889	0.108214	0.0149795	-0.0816169	-0.161975	-0.205901	-0.195839	-0.128178	-0.0197883	0.10408	0.217668	0.297107	0.325326	0.30947	0.263286	0.200089	0.129936	0.0567093	-0.0208151	-0.106899	-0.205428
-0.229335	-0.26571	-0.286409	-0.291393	-0.281007	-0.255951	-0.218142	-0.17032	-0.115218	-0.0554328	0.00645711	0.0678546	0.126151	0.178725	0.222961	0.256353	0.277023	0.284655	0.280131	0.26459	0.239179	0.205052	0.163412	0.11571	0.0638875	0.0101537	-0.0432489	-0.0940764	-0.140167	-0.179908	-0.212885	-0.239271	-0.259369	-0.273535	-0.282178	-0.285797	-0.284954	-0.280218	-0.272179	-0.261429	-0.248552	-0.234101	-0.218491	-0.201992	-0.184785	-0.166901	-0.148238	-0.128605	-0.107788	-0.0855794
-0.68321	-0.676017	-0.663305	-0.64507	-0.621482	-0.592892	-0.559754	-0.522564	-0.481809	-0.437961	-0.391484	-0.342829	-0.292443	-0.240761	-0.188205	-0.135187	-0.0820821	-0.0291848	0.0232835	0.0751379	0.12621	0.176332	0.225328	0.273029	0.319287	0.363959	0.406899	0.44796	0.487002	0.523884	0.558448	0.59056	0.620133	0.647118	0.671506	0.693323	0.712627	0.729507	0.744067	0.756409	0.766626	0.7748	0.781003	0.785293	0.787712	0.78829	0.78705	0.784001	0.779142	0.772468
IMF1	IMF2	IMF3	IMF4	Residual
0.240982	0.282099	-0.130817	-0.229335	-0.68321
0.358442	0.379333	-0.138965	-0.26571	-0.676017
-0.258722	0.108562	-0.184535	-0.286409	-0.663305
-0.0197571	-0.212582	-0.249581	-0.291393	-0.64507
-0.0133331	-0.337656	-0.31087	-0.281007	-0.621482
0.0339631	-0.299458	-0.348635	-0.255951	-0.592892
0.0933727	-0.146777	-0.352947	-0.218142	-0.559754
-0.347709	0.104561	-0.324429	-0.17032	-0.522564
0.3526	0.301906	-0.265444	-0.115218	-0.481809
0.238382	0.253854	-0.178693	-0.0554328	-0.437961
-0.40884	0.0333872	-0.0735938	0.00645711	-0.391484
0.178811	-0.138025	0.0343638	0.0678546	-0.342829
0.177404	-0.228458	0.137228	0.126151	-0.292443
-0.0639255	-0.27975	0.230682	0.178725	-0.240761
-0.073815	-0.229071	0.303051	0.222961	-0.188205
-0.284281	0.0112311	0.34141	0.256353	-0.135187
0.203968	0.277841	0.332127	0.277023	-0.0820821
0.326848	0.326556	0.263096	0.284655	-0.0291848
-0.354673	0.127712	0.13927	0.280131	0.0232835
-0.0678313	-0.102327	-0.0093744	0.26459	0.0751379
0.277019	-0.238769	-0.147094	0.239179	0.12621
-0.131235	-0.270854	-0.239948	0.205052	0.176332
-0.0878664	-0.198095	-0.266498	0.163412	0.225328
0.0486023	-0.0107752	-0.229791	0.11571	0.273029
-0.128128	0.187713	-0.145574	0.0638875	0.319287
0.248788	0.212278	-0.0320412	0.0101537	0.363959
-0.00566498	0.00484425	0.0873002	-0.0432489	0.406899
-0.256189	-0.19862	0.177246	-0.0940764	0.44796
0.052015	-0.148516	0.207456	-0.140167	0.487002
-0.0307253	0.0866032	0.178889	-0.179908	0.523884
0.176848	0.252452	0.108214	-0.212885	0.558448
0.0255501	0.215583	0.0149795	-0.239271	0.59056
-0.172541	0.0403993	-0.0816169	-0.259369	0.620133
0.19172	-0.175513	-0.161975	-0.273535	0.647118
-0.183761	-0.364159	-0.205901	-0.282178	0.671506
-0.0406706	-0.404017	-0.195839	-0.285797	0.693323
-0.107423	-0.278934	-0.128178	-0.284954	0.712627
0.473483	-0.128394	-0.0197883	-0.280218	0.729507
0.164757	0.0580808	0.10408	-0.272179	0.744067
-0.683263	0.328341	0.217668	-0.261429	0.756409
0.676954	0.533928	0.297107	-0.248552	0.766626
-0.402118	0.349072	0.325326	-0.234101	0.7748
-0.384337	-0.052959	0.30947	-0.218491	0.781003
0.16637	-0.371333	0.263286	-0.201992	0.785293
0.0684322	-0.452339	0.200089	-0.184785	0.787712
-0.0875317	-0.351985	0.129936	-0.166901	0.78829
0.0946669	-0.156572	0.0567093	-0.148238	0.78705
-0.0854872	0.0667783	-0.0208151	-0.128605	0.784001
-0.0120655	0.253778	-0.106899	-0.107788	0.779142
0.205096	0.313611	-0.205428	-0.0855794	0.772468
-0.241195	0.22779	-0.316223	-0.0618276	0.763968
0.0281744	0.104387	-0.435955	-0.0363943	0.753631
0.197249	-0.0258679	-0.556809	-0.00915275	0.74145
-0.171962	-0.17366	-0.667903	0.0199884	0.727423
0.153865	-0.296132	-0.760281	0.0510873	0.711555
-0.174472	-0.318326	-0.828796	0.0841445	0.693855
0.18871	-0.215593	-0.869121	0.119015	0.67433
-0.137757	0.00306308	-0.876429	0.155401	0.652982
-0.0419639	0.298265	-0.84507	0.192741	0.629799
0.19411	0.51503	-0.768165	0.230237	0.604759
-0.0686386	0.506236	-0.638817	0.267015	0.577836
-0.131151	0.277198	-0.453693	0.302173	0.549007
0.204946	-0.0931448	-0.216607	0.3348	0.518244
-0.181958	-0.488032	0.0623701	0.363979	0.485525
0.0368899	-0.687121	0.370202	0.388788	0.450828
-0.034197	-0.558191	0.688737	0.408297	0.414141
-0.17066	-0.0966146	0.975455	0.421563	0.375465
-0.457245	0.496287	1.17898	0.42762	0.334825
0.671827	0.665583	1.24755	0.425518	0.29227
-0.637013	0.125856	1.14806	0.414701	0.247892
-0.0687741	-0.419849	0.916469	0.395696	0.201863
0.075959	-0.535799	0.607189	0.369287	0.154386
-0.0123479	-0.371831	0.280704	0.33625	0.105674
0.224583	-0.263686	-0.00182766	0.297361	0.0559444
0.0419987	-0.255441	-0.207233	0.253394	0.0054135
-0.264295	-0.141947	-0.350742	0.205156	-0.0457031
0.23115	0.16977	-0.459906	0.153525	-0.0971896
-0.0659016	0.409573	-0.556896	0.099405	-0.148826
0.0569789	0.441826	-0.66234	0.0437023	-0.200383
-0.126305	0.34732	-0.787938	-0.0127158	-0.251633
0.1228	0.185878	-0.931748	-0.0690341	-0.302349
0.133165	0.0339072	-1.08685	-0.124486	-0.352308
-0.373277	-0.0141404	-1.24092	-0.178323	-0.401288
0.078473	0.0342043	-1.36819	-0.22983	-0.449063
0.377009	-0.0279	-1.43455	-0.2783	-0.495411
-0.273839	-0.319886	-1.41432	-0.323027	-0.54011
0.0625576	-0.635728	-1.28621	-0.363339	-0.582941
-0.152258	-0.69662	-1.0339	-0.398785	-0.623703
-0.130691	-0.43455	-0.665671	-0.42903	-0.662209
-0.125472	0.0479399	-0.224389	-0.453765	-0.698274
0.334839	0.47355	0.23908	-0.472673	-0.731725
0.0272748	0.605056	0.674568	-0.485429	-0.762398
-0.209473	0.533444	1.0363	-0.491689	-0.79015
-0.00394158	0.474239	1.28607	-0.49108	-0.814867
-0.0246408	0.48893	1.40339	-0.483152	-0.836501
0.122638	0.47474	1.3997	-0.467537	-0.855082
[truncated: 46 more columns]

## Sheet: OGAP
-0.000340807	0.00268967	0.00149016	-0.00184526	-0.000423396	0.000511186	-0.00164508	0.000132286	-0.000379929	-0.000384953	-1.82459e-05	0.000931337	0.000872194	0.000656891	0.000361229	-0.00294057	0.00287497	-0.00162165	-0.0007026	0.00176577	0.000958902	-0.00178704	0.000330088	-0.000108303	-0.00140609	0.0017467	9.14047e-05	-0.00101564	-0.000540327	0.00237066	-0.00250618	0.000182201	0.0017786	-0.00126307	0.000440478	-0.000310839	0.00017576	0.00073279	-0.001351	-0.0015695	-0.0026442	0.00163311	0.00772263	-0.00512017	-0.00807131	-0.0025539	0.00109415	0.00311537	0.00356313	0.00142746
0.0037793	0.00539834	0.00384719	0.000312325	-0.00299259	-0.00486099	-0.00506334	-0.00383856	-0.00160697	0.00118563	0.00384474	0.00504779	0.00355066	-0.000249168	-0.0040834	-0.00492613	-0.00180301	0.00239194	0.0048013	0.00429085	0.00111873	-0.00273924	-0.0048059	-0.00388	-0.000613158	0.00298284	0.00480229	0.00446662	0.0026148	-0.000378117	-0.00335236	-0.00482071	-0.00516333	-0.00532931	-0.00510305	-0.00384568	-0.00168606	0.000512299	0.00242806	0.00486819	0.00783405	0.00879217	0.00582656	-0.000952141	-0.00715662	-0.00887845	-0.00666155	-0.00256986	0.00125577	0.00360223
-0.0014758	-0.00154952	-0.00154237	-0.00144508	-0.00124755	-0.00094064	-0.000523337	-1.86076e-05	0.00052139	0.00103713	0.00147364	0.00177704	0.00190096	0.00182947	0.00155263	0.00106005	0.000365031	-0.000435145	-0.0012224	-0.00188933	-0.00236481	-0.00258217	-0.00247293	-0.00199414	-0.00121727	-0.000266358	0.000728233	0.00164106	0.00238559	0.00295627	0.00337375	0.00366693	0.00389519	0.00411767	0.00430932	0.00439191	0.00430792	0.0040217	0.00349079	0.00266841	0.00153371	9.30119e-05	-0.00158039	-0.00329587	-0.00483108	-0.00596526	-0.00654087	-0.00661114	-0.0062834	-0.00566922
-8.41073e-05	-0.000133726	-0.000189915	-0.000254946	-0.000331849	-0.000423453	-0.000532067	-0.00065948	-0.00080717	-0.000976464	-0.00116854	-0.00138426	-0.00162342	-0.0018842	-0.00216285	-0.00245422	-0.00275201	-0.00304941	-0.00333955	-0.00361561	-0.00387081	-0.00409839	-0.00429218	-0.00444833	-0.00456642	-0.00464747	-0.0046927	-0.00470327	-0.00468031	-0.00462512	-0.00453937	-0.00442484	-0.00428346	-0.00411666	-0.00392371	-0.00370185	-0.00344836	-0.0031619	-0.00284353	-0.00249609	-0.00212294	-0.00172706	-0.00131079	-0.000876218	-0.000425402	3.96001e-05	0.000516592	0.00100248	0.00149224	0.00197992
0.00112497	0.00121371	0.00129754	0.00137648	0.00145057	0.00151989	0.00158452	0.00164453	0.00170001	0.00175103	0.00179765	0.00183995	0.00187797	0.00191175	0.00194133	0.00196677	0.00198813	0.00200547	0.00201886	0.00202837	0.00203408	0.00203607	0.0020344	0.00202918	0.00202047	0.00200832	0.00199275	0.00197378	0.00195141	0.00192564	0.00189645	0.00186385	0.00182785	0.00178845	0.00174563	0.00169939	0.00164973	0.00159666	0.00154019	0.00148033	0.00141711	0.00135056	0.0012807	0.00120756	0.00113116	0.00105152	0.000968679	0.000882652	0.000793467	0.00070115
IMF1	IMF2	IMF3	IMF4	Residual
-0.000340807	0.0037793	-0.0014758	-8.41073e-05	0.00112497
0.00268967	0.00539834	-0.00154952	-0.000133726	0.00121371
0.00149016	0.00384719	-0.00154237	-0.000189915	0.00129754
-0.00184526	0.000312325	-0.00144508	-0.000254946	0.00137648
-0.000423396	-0.00299259	-0.00124755	-0.000331849	0.00145057
0.000511186	-0.00486099	-0.00094064	-0.000423453	0.00151989
-0.00164508	-0.00506334	-0.000523337	-0.000532067	0.00158452
0.000132286	-0.00383856	-1.86076e-05	-0.00065948	0.00164453
-0.000379929	-0.00160697	0.00052139	-0.00080717	0.00170001
-0.000384953	0.00118563	0.00103713	-0.000976464	0.00175103
-1.82459e-05	0.00384474	0.00147364	-0.00116854	0.00179765
0.000931337	0.00504779	0.00177704	-0.00138426	0.00183995
0.000872194	0.00355066	0.00190096	-0.00162342	0.00187797
0.000656891	-0.000249168	0.00182947	-0.0018842	0.00191175
0.000361229	-0.0040834	0.00155263	-0.00216285	0.00194133
-0.00294057	-0.00492613	0.00106005	-0.00245422	0.00196677
0.00287497	-0.00180301	0.000365031	-0.00275201	0.00198813
-0.00162165	0.00239194	-0.000435145	-0.00304941	0.00200547
-0.0007026	0.0048013	-0.0012224	-0.00333955	0.00201886
0.00176577	0.00429085	-0.00188933	-0.00361561	0.00202837
0.000958902	0.00111873	-0.00236481	-0.00387081	0.00203408
-0.00178704	-0.00273924	-0.00258217	-0.00409839	0.00203607
0.000330088	-0.0048059	-0.00247293	-0.00429218	0.0020344
-0.000108303	-0.00388	-0.00199414	-0.00444833	0.00202918
-0.00140609	-0.000613158	-0.00121727	-0.00456642	0.00202047
0.0017467	0.00298284	-0.000266358	-0.00464747	0.00200832
9.14047e-05	0.00480229	0.000728233	-0.0046927	0.00199275
-0.00101564	0.00446662	0.00164106	-0.00470327	0.00197378
-0.000540327	0.0026148	0.00238559	-0.00468031	0.00195141
0.00237066	-0.000378117	0.00295627	-0.00462512	0.00192564
-0.00250618	-0.00335236	0.00337375	-0.00453937	0.00189645
0.000182201	-0.00482071	0.00366693	-0.00442484	0.00186385
0.0017786	-0.00516333	0.00389519	-0.00428346	0.00182785
-0.00126307	-0.00532931	0.00411767	-0.00411666	0.00178845
0.000440478	-0.00510305	0.00430932	-0.00392371	0.00174563
-0.000310839	-0.00384568	0.00439191	-0.00370185	0.00169939
0.00017576	-0.00168606	0.00430792	-0.00344836	0.00164973
0.00073279	0.000512299	0.0040217	-0.0031619	0.00159666
-0.001351	0.00242806	0.00349079	-0.00284353	0.00154019
-0.0015695	0.00486819	0.00266841	-0.00249609	0.00148033
-0.0026442	0.00783405	0.00153371	-0.00212294	0.00141711
0.00163311	0.00879217	9.30119e-05	-0.00172706	0.00135056
0.00772263	0.00582656	-0.00158039	-0.00131079	0.0012807
-0.00512017	-0.000952141	-0.00329587	-0.000876218	0.00120756
-0.00807131	-0.00715662	-0.00483108	-0.000425402	0.00113116
-0.0025539	-0.00887845	-0.00596526	3.96001e-05	0.00105152
0.00109415	-0.00666155	-0.00654087	0.000516592	0.000968679
0.00311537	-0.00256986	-0.00661114	0.00100248	0.000882652
0.00356313	0.00125577	-0.0062834	0.00149224	0.000793467
0.00142746	0.00360223	-0.00566922	0.00197992	0.00070115
-0.00102451	0.0047349	-0.00490044	0.00245924	0.000605725
-0.00086361	0.00552622	-0.0041281	0.0029238	0.000507217
0.000347163	0.00602626	-0.00347313	0.00336711	0.000405652
0.000614352	0.00536491	-0.0029589	0.00378221	0.000301054
-0.00146518	0.00287847	-0.00252068	0.0041616	0.000193449
0.00292605	-0.00110228	-0.00206405	0.00449753	8.28614e-05
-0.00350277	-0.00405655	-0.00149162	0.00478222	-3.0683e-05
0.000440445	-0.00388209	-0.000720063	0.00500812	-0.000147159
0.00315197	-0.0022074	0.000285991	0.00516812	-0.000266533
-0.000710498	-0.00103609	0.00151582	0.00525565	-0.000388736
-0.00194707	-0.00040725	0.00290021	0.00526434	-0.0005136
0.00116993	0.000424379	0.00429811	0.00518769	-0.00064088
-1.98146e-05	0.0016115	0.00555005	0.00501907	-0.000770305
-0.000948297	0.00224577	0.00652123	0.00475185	-0.000901593
0.00242219	0.001886	0.00706792	0.00438015	-0.00103445
-0.00218214	0.0014249	0.00705379	0.00390384	-0.00116859
-0.00155672	0.00207636	0.00640131	0.00333497	-0.00130371
0.00185543	0.00312113	0.00516059	0.00269019	-0.00143953
0.00221736	0.00250763	0.00343931	0.00198665	-0.00157576
-0.00129713	-0.000183285	0.00139179	0.00124156	-0.0017121
-0.000861185	-0.00346707	-0.000727567	0.000472095	-0.00184825
0.000845001	-0.00562237	-0.002636	-0.000304553	-0.00198393
-0.00156366	-0.00596399	-0.00406883	-0.0010712	-0.00211885
0.00153989	-0.00515699	-0.00486396	-0.00181068	-0.00225272
4.8089e-05	-0.00400095	-0.00500141	-0.00250647	-0.00238523
-0.00129413	-0.00221358	-0.00456504	-0.003145	-0.00251611
0.000464664	0.000589879	-0.0036879	-0.00371828	-0.00264505
0.000716068	0.00359057	-0.0025197	-0.00422124	-0.00277177
-0.000292634	0.00578017	-0.00121367	-0.00464946	-0.00289598
-7.62548e-06	0.00702389	7.07333e-05	-0.00499856	-0.00301738
0.000441399	0.00782973	0.00117466	-0.00526417	-0.00313569
-0.00114663	0.00888341	0.00196174	-0.00544192	-0.00325062
0.000941128	0.0104622	0.00234819	-0.00552767	-0.00336192
-0.00230399	0.0119873	0.00231767	-0.00552	-0.0034693
-0.00317736	0.0139603	0.00190797	-0.00542678	-0.00357253
-0.00229464	0.0160382	0.00123794	-0.00526309	-0.00367138
-0.000870387	0.0144997	0.000473225	-0.00504562	-0.00376565
0.0107095	0.00537667	-0.000230347	-0.00479117	-0.00385514
0.0137599	-0.008357	-0.000755362	-0.00451647	-0.00393965
-0.0159256	-0.0190356	-0.000993897	-0.00423783	-0.00401898
0.0144199	-0.0179499	-0.000880225	-0.00396872	-0.00409294
0.0161421	-0.00750513	-0.000514991	-0.00371557	-0.00416134
0.00368432	0.00640352	-4.82861e-05	-0.00348183	-0.00422401
-0.0102395	0.0171375	0.000367635	-0.00327054	-0.00428077
-0.0141641	0.0205209	0.000580549	-0.0030848	-0.00433144
-0.00804559	0.0168412	0.000476697	-0.00292685	-0.00437586
[truncated: 46 more columns]
