# Supplementary material for: Macroeconomic Imbalances and Financial Stress Among BRICS: Analysis of Frequency-Dependent and Asymmetric Causal Nexuses
Source: publisher site journal article supplement (doi:10.1515/snde-2024-0045), 2025-04-16
Supplement: Supplementary file 4 [file China.xlsx]

## Sheet: CA
1.23118	-0.729895	-0.612618	0.965217	-0.626455	-0.839215	1.03246	-0.732122	-0.0284271	0.168221	0.25787	-0.672518	0.821096	-0.725831	0.163021	-0.753324	0.957987	-0.318077	-0.543705	0.565384	-0.573193	0.638372	-0.743834	0.855299	-0.362099	-0.575531	-0.45619	0.668815	0.619196	0.270873	-0.430512	-0.87021	0.852764	0.1259	-0.544597	-0.431796	0.6104	0.353168	0.436268	-1.15222	1.1673	-0.613711	-0.794507	0.48791	1.11529	-1.08065	-0.731935	1.24139	-0.800908	-0.735555
1.05571	0.464302	-0.32692	-0.83295	-0.670233	-0.0538108	0.478493	0.397783	0.0428375	-0.12389	-0.0342087	0.22414	0.28266	-0.193995	-0.503687	-0.0136781	0.525356	0.329533	-0.194818	-0.432817	-0.177037	0.196719	0.347338	0.129407	-0.348162	-0.584743	-0.1675	0.507641	0.734971	0.260871	-0.433703	-0.763379	-0.622917	-0.315408	0.0455759	0.492406	0.772123	0.461883	-0.368796	-0.845156	-0.381074	0.453727	0.937786	0.769797	0.0370131	-0.792277	-1.07067	-0.593312	0.287178	0.912524
0.252647	0.0847991	-0.0846082	-0.208102	-0.247996	-0.20649	-0.104963	0.0288978	0.141121	0.173512	0.103554	-0.0289461	-0.146577	-0.182066	-0.103438	0.0805935	0.269921	0.35971	0.320919	0.163824	-0.0817925	-0.348039	-0.558542	-0.662248	-0.655675	-0.565241	-0.43233	-0.296154	-0.191406	-0.132198	-0.0839826	-0.00321345	0.143964	0.358724	0.614784	0.878111	1.116	1.29711	1.38825	1.35621	1.17166	0.852013	0.435667	-0.0318629	-0.499471	-0.912126	-1.21572	-1.37164	-1.38911	-1.30404
-1.20686	-1.3534	-1.51297	-1.67268	-1.81969	-1.94284	-2.03695	-2.10233	-2.14034	-2.15316	-2.14646	-2.13099	-2.11932	-2.12234	-2.14335	-2.17629	-2.21157	-2.23907	-2.24986	-2.23718	-2.1954	-2.11977	-2.00559	-1.84796	-1.64347	-1.39305	-1.10143	-0.775035	-0.421589	-0.0508147	0.325598	0.695317	1.04664	1.36883	1.6521	1.88708	2.0645	2.17507	2.20963	2.16225	2.03728	1.84565	1.59981	1.31243	0.996175	0.663708	0.32758	-5.9724e-05	-0.308576	-0.58981
-1.34575	-1.40498	-1.46746	-1.53138	-1.59493	-1.65632	-1.71355	-1.76405	-1.80508	-1.83393	-1.8479	-1.84436	-1.82081	-1.77522	-1.70737	-1.61819	-1.50913	-1.382	-1.2388	-1.08161	-0.912485	-0.733484	-0.546587	-0.353703	-0.156724	0.042371	0.241573	0.438869	0.632247	0.819695	0.999201	1.16875	1.32634	1.46994	1.59756	1.70717	1.79676	1.86437	1.90838	1.9283	1.92496	1.8998	1.85437	1.79021	1.70885	1.61185	1.50074	1.37707	1.24237	1.0982
5.88185	5.87053	5.85759	5.84306	5.82698	5.80938	5.7903	5.76979	5.74787	5.7246	5.69999	5.6741	5.64696	5.61861	5.58908	5.55842	5.52666	5.49384	5.46	5.42517	5.38939	5.35271	5.31515	5.27676	5.23758	5.19763	5.15697	5.11563	5.07364	5.03104	4.98787	4.94418	4.89999	4.85535	4.81028	4.76484	4.71906	4.67297	4.62662	4.58004	4.53327	4.48634	4.43931	4.39219	4.34503	4.29788	4.25076	4.20371	4.15678	4.11
IMF1	IMF2	IMF3	IMF4	IMF5	Residual
1.23118	1.05571	0.252647	-1.20686	-1.34575	5.88185
-0.729895	0.464302	0.0847991	-1.3534	-1.40498	5.87053
-0.612618	-0.32692	-0.0846082	-1.51297	-1.46746	5.85759
0.965217	-0.83295	-0.208102	-1.67268	-1.53138	5.84306
-0.626455	-0.670233	-0.247996	-1.81969	-1.59493	5.82698
-0.839215	-0.0538108	-0.20649	-1.94284	-1.65632	5.80938
1.03246	0.478493	-0.104963	-2.03695	-1.71355	5.7903
-0.732122	0.397783	0.0288978	-2.10233	-1.76405	5.76979
-0.0284271	0.0428375	0.141121	-2.14034	-1.80508	5.74787
0.168221	-0.12389	0.173512	-2.15316	-1.83393	5.7246
0.25787	-0.0342087	0.103554	-2.14646	-1.8479	5.69999
-0.672518	0.22414	-0.0289461	-2.13099	-1.84436	5.6741
0.821096	0.28266	-0.146577	-2.11932	-1.82081	5.64696
-0.725831	-0.193995	-0.182066	-2.12234	-1.77522	5.61861
0.163021	-0.503687	-0.103438	-2.14335	-1.70737	5.58908
-0.753324	-0.0136781	0.0805935	-2.17629	-1.61819	5.55842
0.957987	0.525356	0.269921	-2.21157	-1.50913	5.52666
-0.318077	0.329533	0.35971	-2.23907	-1.382	5.49384
-0.543705	-0.194818	0.320919	-2.24986	-1.2388	5.46
0.565384	-0.432817	0.163824	-2.23718	-1.08161	5.42517
-0.573193	-0.177037	-0.0817925	-2.1954	-0.912485	5.38939
0.638372	0.196719	-0.348039	-2.11977	-0.733484	5.35271
-0.743834	0.347338	-0.558542	-2.00559	-0.546587	5.31515
0.855299	0.129407	-0.662248	-1.84796	-0.353703	5.27676
-0.362099	-0.348162	-0.655675	-1.64347	-0.156724	5.23758
-0.575531	-0.584743	-0.565241	-1.39305	0.042371	5.19763
-0.45619	-0.1675	-0.43233	-1.10143	0.241573	5.15697
0.668815	0.507641	-0.296154	-0.775035	0.438869	5.11563
0.619196	0.734971	-0.191406	-0.421589	0.632247	5.07364
0.270873	0.260871	-0.132198	-0.0508147	0.819695	5.03104
-0.430512	-0.433703	-0.0839826	0.325598	0.999201	4.98787
-0.87021	-0.763379	-0.00321345	0.695317	1.16875	4.94418
0.852764	-0.622917	0.143964	1.04664	1.32634	4.89999
0.1259	-0.315408	0.358724	1.36883	1.46994	4.85535
-0.544597	0.0455759	0.614784	1.6521	1.59756	4.81028
-0.431796	0.492406	0.878111	1.88708	1.70717	4.76484
0.6104	0.772123	1.116	2.0645	1.79676	4.71906
0.353168	0.461883	1.29711	2.17507	1.86437	4.67297
0.436268	-0.368796	1.38825	2.20963	1.90838	4.62662
-1.15222	-0.845156	1.35621	2.16225	1.9283	4.58004
1.1673	-0.381074	1.17166	2.03728	1.92496	4.53327
-0.613711	0.453727	0.852013	1.84565	1.8998	4.48634
-0.794507	0.937786	0.435667	1.59981	1.85437	4.43931
0.48791	0.769797	-0.0318629	1.31243	1.79021	4.39219
1.11529	0.0370131	-0.499471	0.996175	1.70885	4.34503
-1.08065	-0.792277	-0.912126	0.663708	1.61185	4.29788
-0.731935	-1.07067	-1.21572	0.32758	1.50074	4.25076
1.24139	-0.593312	-1.37164	-5.9724e-05	1.37707	4.20371
-0.800908	0.287178	-1.38911	-0.308576	1.24237	4.15678
-0.735555	0.912524	-1.30404	-0.58981	1.0982	4.11
0.925039	0.926582	-1.15857	-0.837863	0.946087	4.0634
0.604686	0.32747	-0.984105	-1.0484	0.787578	4.01703
-1.09598	-0.393057	-0.792807	-1.2186	0.624216	3.97093
0.995727	-0.685585	-0.589809	-1.3469	0.45754	3.92512
-0.0223016	-0.562151	-0.376597	-1.43249	0.289053	3.87966
-0.828055	-0.226213	-0.161326	-1.47445	0.120018	3.83457
0.319788	0.145844	0.0373678	-1.47094	-0.0488247	3.7899
0.358052	0.33092	0.191939	-1.41949	-0.217014	3.74568
0.587277	0.215733	0.264103	-1.31846	-0.38395	3.70195
-1.1039	0.175047	0.218603	-1.16912	-0.548755	3.65874
1.10064	0.325468	0.0614098	-0.978015	-0.710434	3.61611
-0.0169256	0.158968	-0.147141	-0.756128	-0.86791	3.57408
-0.38711	-0.259487	-0.329699	-0.515807	-1.02	3.53269
-0.801709	-0.446578	-0.408634	-0.26961	-1.16546	3.49198
0.0222921	-0.289176	-0.334393	-0.0296365	-1.30305	3.45198
0.876935	-0.0353241	-0.133643	0.194134	-1.43153	3.41275
0.140238	0.143148	0.131633	0.393399	-1.54965	3.3743
-1.09356	0.310296	0.389074	0.560247	-1.65622	3.33669
1.04579	0.363705	0.576273	0.686978	-1.75018	3.29994
-0.389879	0.030645	0.657073	0.76689	-1.8307	3.26411
-0.366828	-0.31519	0.629082	0.797157	-1.89719	3.22921
-0.263744	-0.192019	0.504709	0.780481	-1.94946	3.1953
0.323146	0.221045	0.323614	0.722903	-1.98792	3.16241
-0.0402352	0.349022	0.144905	0.631493	-2.01342	3.13058
0.755482	-0.0833274	0.0124401	0.51364	-2.02694	3.09984
-0.967229	-0.482104	-0.0582409	0.377126	-2.02945	3.07024
0.597391	-0.150345	-0.067461	0.230593	-2.02194	3.04181
0.362279	0.454055	-0.0440964	0.0835798	-2.0054	3.01458
-0.319969	0.577847	-0.0236	-0.0542354	-1.98079	2.98861
0.60831	0.000252267	-0.0306356	-0.174146	-1.9491	2.96392
-0.65896	-0.656874	-0.0733215	-0.269524	-1.91131	2.94055
0.0608217	-0.684479	-0.153577	-0.33633	-1.8684	2.91854
0.121416	-0.13681	-0.265026	-0.372987	-1.8214	2.89793
-0.102506	0.515552	-0.386868	-0.379752	-1.77146	2.87876
0.302721	0.838422	-0.494085	-0.358256	-1.71974	2.86106
-0.327495	0.592649	-0.56096	-0.311547	-1.66712	2.84487
0.484269	-0.152229	-0.564611	-0.24407	-1.61417	2.83023
0.428417	-0.825384	-0.484056	-0.161429	-1.56134	2.81718
-1.25734	-0.726122	-0.307696	-0.0701188	-1.50905	2.80576
1.23913	0.210992	-0.0633726	0.0227533	-1.45771	2.796
-0.349133	0.795367	0.202625	0.109849	-1.40773	2.78794
-0.473021	0.564841	0.443092	0.183758	-1.35949	2.78162
0.478476	-0.0786344	0.618971	0.237043	-1.3134	2.77707
-0.465144	-0.565018	0.704481	0.262353	-1.26988	2.77434
0.0385402	-0.666242	0.690052	0.253898	-1.22947	2.77347
0.000410727	-0.427427	0.583861	0.211161	-1.19278	2.77448
[truncated: 46 more columns]

## Sheet: CGD
0.00841116	0.010859	0.00751055	-0.0170714	0.00265987	0.00195268	-0.000795079	0.00937772	-0.00415363	-0.00389187	0.0049652	-0.000766356	-0.00115728	0.000439462	0.000789133	-0.00195243	0.000268138	0.000149734	-0.000250242	0.00106711	-0.000532366	-0.000355028	0.00011642	0.000109637	-3.71283e-06	-0.000327726	-0.000388453	0.000873479	-0.000336602	-0.000378327	-0.000128164	0.000291275	1.52262e-05	0.000480279	0.000523666	-0.0016906	0.00055526	0.000948377	0.000400655	-0.00200338	7.68904e-05	-9.55451e-05	-0.000236605	0.00240187	-0.000702147	-0.000659172	-7.19719e-06	-0.000379775	0.000255435	0.000113022
-0.038973	-0.0436443	-0.0545403	-0.0563875	-0.037527	-0.0048317	0.0266078	0.0450721	0.0480946	0.0419685	0.0324529	0.0208384	0.00816862	-0.00298131	-0.0102433	-0.0127793	-0.0110092	-0.00677995	-0.00225745	0.000674676	0.0012194	0.000342042	-0.000605089	-0.00098324	-0.000818844	-0.000235064	0.000560807	0.000818554	0.000227532	-0.000398426	-0.000276467	0.000443874	0.000900957	0.000354259	-0.000675318	-0.000981584	-0.000221742	5.50085e-05	-0.00107097	-0.00234974	-0.00202862	0.000114414	0.00277314	0.00404567	0.00280328	0.000159869	-0.00186615	-0.00232681	-0.00150108	-0.000303918
-0.0661397	-0.0762022	-0.0766296	-0.0672284	-0.0501099	-0.0281698	-0.00440365	0.0182581	0.0372554	0.051071	0.059449	0.0629272	0.0624039	0.0588309	0.0532132	0.0466689	0.0402151	0.034521	0.0297486	0.0258059	0.0225253	0.0198123	0.0177511	0.0164197	0.0157837	0.0156049	0.0155059	0.0150487	0.0138392	0.0116458	0.00842453	0.00431108	-0.000376231	-0.0051695	-0.0095318	-0.0129234	-0.0148899	-0.0151498	-0.0136392	-0.0105882	-0.00653748	-0.00227195	0.00136084	0.00363411	0.00419298	0.00320921	0.00126493	-0.000896353	-0.00261927	-0.00352314
-0.0403874	-0.04204	-0.0420357	-0.0403873	-0.0372994	-0.0330185	-0.0277915	-0.0218653	-0.0154871	-0.00890298	-0.00235365	0.00393883	0.00979717	0.015094	0.0197323	0.0236391	0.026756	0.0290392	0.0304638	0.0310292	0.0307565	0.0296877	0.0278773	0.0253886	0.0222946	0.0186876	0.0146805	0.0104027	0.005992	0.00158996	-0.00266286	-0.00662774	-0.0101776	-0.0131966	-0.0155843	-0.0172566	-0.0181572	-0.0182791	-0.0176724	-0.0164325	-0.0146727	-0.0125114	-0.0100676	-0.00745153	-0.00475293	-0.0020417	0.000622017	0.00318283	0.00559354	0.00781694
1.30205	1.30326	1.30521	1.30786	1.31117	1.31507	1.3195	1.32438	1.32966	1.33527	1.34114	1.34722	1.35345	1.35979	1.36619	1.37261	1.37902	1.38538	1.39166	1.39785	1.40393	1.40988	1.41569	1.42136	1.42689	1.43226	1.43747	1.44253	1.44743	1.45218	1.45676	1.46118	1.46544	1.46953	1.47347	1.47725	1.48089	1.48437	1.4877	1.49087	1.49386	1.49667	1.49928	1.50168	1.50387	1.50585	1.50761	1.50914	1.51045	1.51154
IMF1	IMF2	IMF3	IMF4	Residual
0.00841116	-0.038973	-0.0661397	-0.0403874	1.30205
0.010859	-0.0436443	-0.0762022	-0.04204	1.30326
0.00751055	-0.0545403	-0.0766296	-0.0420357	1.30521
-0.0170714	-0.0563875	-0.0672284	-0.0403873	1.30786
0.00265987	-0.037527	-0.0501099	-0.0372994	1.31117
0.00195268	-0.0048317	-0.0281698	-0.0330185	1.31507
-0.000795079	0.0266078	-0.00440365	-0.0277915	1.3195
0.00937772	0.0450721	0.0182581	-0.0218653	1.32438
-0.00415363	0.0480946	0.0372554	-0.0154871	1.32966
-0.00389187	0.0419685	0.051071	-0.00890298	1.33527
0.0049652	0.0324529	0.059449	-0.00235365	1.34114
-0.000766356	0.0208384	0.0629272	0.00393883	1.34722
-0.00115728	0.00816862	0.0624039	0.00979717	1.35345
0.000439462	-0.00298131	0.0588309	0.015094	1.35979
0.000789133	-0.0102433	0.0532132	0.0197323	1.36619
-0.00195243	-0.0127793	0.0466689	0.0236391	1.37261
0.000268138	-0.0110092	0.0402151	0.026756	1.37902
0.000149734	-0.00677995	0.034521	0.0290392	1.38538
-0.000250242	-0.00225745	0.0297486	0.0304638	1.39166
0.00106711	0.000674676	0.0258059	0.0310292	1.39785
-0.000532366	0.0012194	0.0225253	0.0307565	1.40393
-0.000355028	0.000342042	0.0198123	0.0296877	1.40988
0.00011642	-0.000605089	0.0177511	0.0278773	1.41569
0.000109637	-0.00098324	0.0164197	0.0253886	1.42136
-3.71283e-06	-0.000818844	0.0157837	0.0222946	1.42689
-0.000327726	-0.000235064	0.0156049	0.0186876	1.43226
-0.000388453	0.000560807	0.0155059	0.0146805	1.43747
0.000873479	0.000818554	0.0150487	0.0104027	1.44253
-0.000336602	0.000227532	0.0138392	0.005992	1.44743
-0.000378327	-0.000398426	0.0116458	0.00158996	1.45218
-0.000128164	-0.000276467	0.00842453	-0.00266286	1.45676
0.000291275	0.000443874	0.00431108	-0.00662774	1.46118
1.52262e-05	0.000900957	-0.000376231	-0.0101776	1.46544
0.000480279	0.000354259	-0.0051695	-0.0131966	1.46953
0.000523666	-0.000675318	-0.0095318	-0.0155843	1.47347
-0.0016906	-0.000981584	-0.0129234	-0.0172566	1.47725
0.00055526	-0.000221742	-0.0148899	-0.0181572	1.48089
0.000948377	5.50085e-05	-0.0151498	-0.0182791	1.48437
0.000400655	-0.00107097	-0.0136392	-0.0176724	1.4877
-0.00200338	-0.00234974	-0.0105882	-0.0164325	1.49087
7.68904e-05	-0.00202862	-0.00653748	-0.0146727	1.49386
-9.55451e-05	0.000114414	-0.00227195	-0.0125114	1.49667
-0.000236605	0.00277314	0.00136084	-0.0100676	1.49928
0.00240187	0.00404567	0.00363411	-0.00745153	1.50168
-0.000702147	0.00280328	0.00419298	-0.00475293	1.50387
-0.000659172	0.000159869	0.00320921	-0.0020417	1.50585
-7.19719e-06	-0.00186615	0.00126493	0.000622017	1.50761
-0.000379775	-0.00232681	-0.000896353	0.00318283	1.50914
0.000255435	-0.00150108	-0.00261927	0.00559354	1.51045
0.000113022	-0.000303918	-0.00352314	0.00781694	1.51154
-1.01148e-05	0.000437395	-0.00354531	0.00982243	1.5124
0.000305381	0.000509022	-0.00286282	0.0115836	1.51303
-1.49274e-05	0.000174079	-0.00174082	0.013075	1.51343
-0.000177328	4.8697e-05	-0.000454461	0.0142695	1.51359
-0.000128955	0.000317623	0.000791903	0.015136	1.51352
0.000859871	0.000440874	0.00183673	0.0156464	1.51321
-0.000168538	3.22216e-05	0.00259498	0.0157815	1.51266
-0.000272039	-0.000368617	0.00303064	0.0155364	1.51189
-6.59203e-05	-0.000152159	0.00312948	0.0149229	1.51089
0.000774299	0.000307456	0.00290092	0.0139699	1.50968
-0.000252462	0.000376659	0.00240168	0.0127226	1.50828
-0.00026001	2.26906e-05	0.00171957	0.0112408	1.5067
1.24967e-05	-0.000171135	0.000922365	0.00959586	1.50495
0.000150731	7.78904e-05	4.47078e-05	0.00786765	1.50307
-0.000124249	0.000230239	-0.000853745	0.00613519	1.50105
4.56049e-05	-0.000103477	-0.00166857	0.00447289	1.49892
7.63741e-05	-0.000556066	-0.00226288	0.00294645	1.49669
-0.000589004	-0.000760586	-0.00251401	0.00160993	1.49438
0.000226846	-0.000489333	-0.00237065	0.000501592	1.492
0.000186804	0.00012317	-0.00189831	-0.000360642	1.48955
-6.27518e-05	0.00056239	-0.00123858	-0.000977897	1.48706
-4.65592e-05	0.000512895	-0.000543429	-0.00136903	1.48452
-1.04362e-05	0.000253416	9.9002e-05	-0.00156399	1.48196
1.97293e-05	-5.17199e-05	0.000651489	-0.00159843	1.47938
-5.3746e-06	-0.000313497	0.00110507	-0.00151185	1.47679
-0.000133474	-0.000444838	0.00145574	-0.00134877	1.4742
5.04766e-05	-0.000380855	0.00167542	-0.00115414	1.47162
1.31962e-05	7.50366e-05	0.0017162	-0.000969932	1.46905
-4.87115e-05	0.000818984	0.00151119	-0.000831925	1.46652
0.000383616	0.00138192	0.00102946	-0.000768194	1.46402
-0.000157238	0.00104725	0.00034407	-0.000800326	1.46157
0.000153017	-7.52843e-05	-0.000346269	-0.000945409	1.45917
0.000291775	-0.00120548	-0.000797207	-0.00121368	1.45684
-0.000612769	-0.00169282	-0.000794551	-0.00160593	1.45457
0.00017073	-0.0011208	-0.000273089	-0.00211172	1.45239
-3.45764e-07	3.43174e-05	0.000622482	-0.00271061	1.4503
-0.000182207	0.00109081	0.00158962	-0.00337342	1.44831
0.000496617	0.00150018	0.00225678	-0.00406402	1.44643
-0.000127324	0.00114965	0.00232104	-0.00473955	1.44468
-2.52832e-05	0.000601156	0.00165039	-0.00535131	1.44308
4.47562e-05	0.000454079	0.000336718	-0.00584868	1.44163
7.25e-05	0.00038418	-0.00134977	-0.00618348	1.44036
0.000310569	-0.000305483	-0.00302378	-0.00631116	1.43928
0.000461093	-0.00179922	-0.00425468	-0.00619155	1.4384
-0.000841006	-0.00314537	-0.00466737	-0.00579342	1.43773
-0.00490676	-0.00319732	-0.00410612	-0.00510813	1.43726
[truncated: 46 more columns]

## Sheet: FSI
0.527602	0.332738	-0.491963	0.245493	-0.00959134	0.0379726	0.00901788	-0.0279528	-0.0646207	0.215832	-0.179871	-0.0348031	0.0168964	0.120057	-0.00534874	-0.0903901	0.0205558	-0.0782059	0.0200078	0.353066	-0.364364	-0.170902	0.407095	-0.259156	0.130251	-0.200072	0.102307	0.0902392	0.0186813	-0.260346	0.239931	0.181495	-0.17087	-0.162103	0.234756	-0.105383	0.189366	-0.16768	-0.678799	0.173414	1.09256	-0.860614	-1.06636	-0.0484895	0.758025	0.332947	-0.44475	0.203543	0.204327	-0.46223
0.126336	-0.0536234	-0.212874	-0.168132	0.0297016	0.163021	0.148135	0.063933	-0.0112766	-0.0854636	-0.144965	-0.0746871	0.0911904	0.15337	0.0227928	-0.1389	-0.137877	0.0303513	0.181502	0.152424	0.00799736	-0.0667097	-0.102793	-0.229863	-0.364567	-0.301159	-0.0409228	0.243947	0.43266	0.524767	0.462404	0.14817	-0.279237	-0.51696	-0.502339	-0.423315	-0.322481	-0.0584633	0.298937	0.486946	0.351867	-0.101923	-0.429051	-0.3246	0.0328931	0.347812	0.347781	-0.030086	-0.352249	-0.288146
0.0361074	0.0236282	0.023771	0.041223	0.0711629	0.10313	0.126664	0.136187	0.133239	0.125041	0.118531	0.113104	0.101648	0.0755241	0.0304044	-0.0295702	-0.0976691	-0.167655	-0.233683	-0.291304	-0.336995	-0.36302	-0.353175	-0.291954	-0.178337	-0.0223906	0.153302	0.320463	0.449912	0.514016	0.496854	0.409085	0.275708	0.123928	-0.0198631	-0.137919	-0.231281	-0.314405	-0.395427	-0.474202	-0.545805	-0.594211	-0.59813	-0.539874	-0.422412	-0.25484	-0.0478746	0.17847	0.388061	0.547618
1.30162	1.30524	1.29914	1.28307	1.2568	1.22017	1.17311	1.11573	1.04838	0.971574	0.886143	0.793412	0.695034	0.592675	0.487913	0.382142	0.27667	0.172765	0.0716711	-0.0254933	-0.117876	-0.205045	-0.287128	-0.364874	-0.439286	-0.511342	-0.581979	-0.652123	-0.722689	-0.794581	-0.868335	-0.943148	-1.01733	-1.08897	-1.15609	-1.21664	-1.26852	-1.30954	-1.33758	-1.35062	-1.34677	-1.32455	-1.28334	-1.22387	-1.14755	-1.05587	-0.950289	-0.832295	-0.703358	-0.56494
-0.515362	-0.515015	-0.514505	-0.51383	-0.512995	-0.512003	-0.510859	-0.509568	-0.508134	-0.506559	-0.504847	-0.502998	-0.501004	-0.498857	-0.496547	-0.494065	-0.491406	-0.488561	-0.485524	-0.482289	-0.478852	-0.475208	-0.471359	-0.467306	-0.463049	-0.458592	-0.453934	-0.449079	-0.444029	-0.438782	-0.433338	-0.427696	-0.42185	-0.415797	-0.409534	-0.403055	-0.396356	-0.389433	-0.382282	-0.374898	-0.36728	-0.359432	-0.351365	-0.343096	-0.334646	-0.326038	-0.317297	-0.308444	-0.299502	-0.290492
IMF1	IMF2	IMF3	IMF4	Residual
0.527602	0.126336	0.0361074	1.30162	-0.515362
0.332738	-0.0536234	0.0236282	1.30524	-0.515015
-0.491963	-0.212874	0.023771	1.29914	-0.514505
0.245493	-0.168132	0.041223	1.28307	-0.51383
-0.00959134	0.0297016	0.0711629	1.2568	-0.512995
0.0379726	0.163021	0.10313	1.22017	-0.512003
0.00901788	0.148135	0.126664	1.17311	-0.510859
-0.0279528	0.063933	0.136187	1.11573	-0.509568
-0.0646207	-0.0112766	0.133239	1.04838	-0.508134
0.215832	-0.0854636	0.125041	0.971574	-0.506559
-0.179871	-0.144965	0.118531	0.886143	-0.504847
-0.0348031	-0.0746871	0.113104	0.793412	-0.502998
0.0168964	0.0911904	0.101648	0.695034	-0.501004
0.120057	0.15337	0.0755241	0.592675	-0.498857
-0.00534874	0.0227928	0.0304044	0.487913	-0.496547
-0.0903901	-0.1389	-0.0295702	0.382142	-0.494065
0.0205558	-0.137877	-0.0976691	0.27667	-0.491406
-0.0782059	0.0303513	-0.167655	0.172765	-0.488561
0.0200078	0.181502	-0.233683	0.0716711	-0.485524
0.353066	0.152424	-0.291304	-0.0254933	-0.482289
-0.364364	0.00799736	-0.336995	-0.117876	-0.478852
-0.170902	-0.0667097	-0.36302	-0.205045	-0.475208
0.407095	-0.102793	-0.353175	-0.287128	-0.471359
-0.259156	-0.229863	-0.291954	-0.364874	-0.467306
0.130251	-0.364567	-0.178337	-0.439286	-0.463049
-0.200072	-0.301159	-0.0223906	-0.511342	-0.458592
0.102307	-0.0409228	0.153302	-0.581979	-0.453934
0.0902392	0.243947	0.320463	-0.652123	-0.449079
0.0186813	0.43266	0.449912	-0.722689	-0.444029
-0.260346	0.524767	0.514016	-0.794581	-0.438782
0.239931	0.462404	0.496854	-0.868335	-0.433338
0.181495	0.14817	0.409085	-0.943148	-0.427696
-0.17087	-0.279237	0.275708	-1.01733	-0.42185
-0.162103	-0.51696	0.123928	-1.08897	-0.415797
0.234756	-0.502339	-0.0198631	-1.15609	-0.409534
-0.105383	-0.423315	-0.137919	-1.21664	-0.403055
0.189366	-0.322481	-0.231281	-1.26852	-0.396356
-0.16768	-0.0584633	-0.314405	-1.30954	-0.389433
-0.678799	0.298937	-0.395427	-1.33758	-0.382282
0.173414	0.486946	-0.474202	-1.35062	-0.374898
1.09256	0.351867	-0.545805	-1.34677	-0.36728
-0.860614	-0.101923	-0.594211	-1.32455	-0.359432
-1.06636	-0.429051	-0.59813	-1.28334	-0.351365
-0.0484895	-0.3246	-0.539874	-1.22387	-0.343096
0.758025	0.0328931	-0.422412	-1.14755	-0.334646
0.332947	0.347812	-0.25484	-1.05587	-0.326038
-0.44475	0.347781	-0.0478746	-0.950289	-0.317297
0.203543	-0.030086	0.17847	-0.832295	-0.308444
0.204327	-0.352249	0.388061	-0.703358	-0.299502
-0.46223	-0.288146	0.547618	-0.56494	-0.290492
0.317039	0.120051	0.636772	-0.418477	-0.281436
0.331668	0.386871	0.638924	-0.265407	-0.272356
-0.0526651	0.22525	0.544979	-0.107423	-0.263271
-0.29532	-0.144376	0.374532	0.0532441	-0.254194
0.145988	-0.411484	0.156772	0.213955	-0.245137
-0.170121	-0.430762	-0.0783599	0.37176	-0.236111
0.179887	-0.27594	-0.30311	0.523639	-0.227135
-0.147784	-0.00783836	-0.495538	0.666649	-0.218228
-0.0480076	0.330907	-0.637766	0.798055	-0.209416
0.193151	0.579767	-0.71194	0.915714	-0.20072
-0.0594625	0.578653	-0.701834	1.01844	-0.192161
-0.117532	0.340558	-0.601461	1.10573	-0.183761
0.217817	-0.050142	-0.420686	1.1768	-0.175551
-0.168124	-0.475669	-0.177389	1.23063	-0.167561
0.0577162	-0.70984	0.105383	1.26615	-0.159823
-0.0119067	-0.598906	0.399663	1.2823	-0.152366
-0.158185	-0.132249	0.662843	1.27801	-0.145209
-0.447435	0.469043	0.845035	1.25219	-0.138361
0.677801	0.656886	0.896	1.20389	-0.131824
-0.630438	0.136903	0.78549	1.13313	-0.12559
-0.0524317	-0.398056	0.553889	1.04165	-0.119646
0.0859806	-0.492891	0.260303	0.93161	-0.11398
-0.0187109	-0.308605	-0.030844	0.805186	-0.108577
0.2093	-0.199989	-0.258074	0.664558	-0.103419
0.0325882	-0.216109	-0.391922	0.512066	-0.0984906
-0.26978	-0.132635	-0.452142	0.350799	-0.0937733
0.234329	0.139896	-0.472192	0.184572	-0.0892545
-0.0598133	0.347748	-0.483126	0.0174723	-0.0849257
0.055184	0.367423	-0.515616	-0.146428	-0.0807793
-0.129349	0.268175	-0.589637	-0.303652	-0.076809
0.118214	0.117353	-0.705274	-0.451736	-0.0730112
0.137429	-0.0225044	-0.853023	-0.589086	-0.0693834
-0.363863	-0.0457852	-1.01808	-0.714303	-0.0659225
0.0781533	0.0478239	-1.17176	-0.825997	-0.0626252
0.368467	0.0281753	-1.27353	-0.922777	-0.0594875
-0.277261	-0.243918	-1.2901	-1.00339	-0.0565048
0.0754451	-0.564759	-1.19528	-1.0674	-0.0536722
-0.123016	-0.648088	-0.967405	-1.11577	-0.0509868
-0.103126	-0.409561	-0.610783	-1.15024	-0.0484462
-0.114149	0.0503592	-0.171469	-1.17266	-0.0460457
0.330314	0.447974	0.293455	-1.18489	-0.0437787
0.0180878	0.543942	0.727491	-1.18881	-0.0416374
-0.208534	0.432253	1.08061	-1.18629	-0.0396142
0.00517131	0.349004	1.31314	-1.17919	-0.0377016
-0.0162809	0.362293	1.40726	-1.16936	-0.0358923
0.122795	0.362295	1.38169	-1.15814	-0.034184
[truncated: 46 more columns]

## Sheet: OGAP
-0.261678	-0.687141	-0.215877	0.626439	0.412114	-0.127582	0.0803891	-0.84618	0.593663	0.565079	0.298851	-0.978613	0.85931	0.0693596	-0.144596	-0.541334	0.477705	-0.0977836	0.311147	-0.782442	0.839395	-0.81994	0.250912	-0.217806	-0.108353	0.952278	-0.325282	-1.02642	0.904752	0.249348	-0.700684	0.243461	-0.311278	0.741811	-0.53678	-0.40622	0.136183	0.643263	-0.00874761	0.492281	-0.545716	0.439518	0.599764	-0.640139	-1.12215	-0.271358	0.626578	0.73283	0.743664	-0.202837
-0.350152	-0.445651	-0.0753031	0.385821	0.457416	0.0823864	-0.369752	-0.373823	0.0558675	0.294567	0.0761049	-0.0410352	0.15674	0.150501	-0.159002	-0.300551	-0.124807	0.0154289	0.0214117	0.271229	0.382128	-0.148218	-0.448093	-0.0623174	0.40076	0.371429	-0.108076	-0.437677	-0.24763	0.0777505	0.278216	0.409078	0.496732	0.0526744	-0.686782	-0.842114	-0.155103	0.742462	1.18548	1.0413	0.597207	-0.0461427	-0.779911	-1.36709	-1.38097	-0.596866	0.497477	1.19441	1.03978	0.287143
0.192322	0.20665	0.181603	0.115353	0.0114027	-0.10988	-0.197163	-0.199249	-0.106727	0.0394385	0.17409	0.211367	0.110188	-0.0678489	-0.228614	-0.285712	-0.188558	0.0221931	0.261988	0.435678	0.504154	0.464703	0.337594	0.144408	-0.116478	-0.440239	-0.771594	-1.01765	-1.09612	-0.996488	-0.745355	-0.382108	0.0650578	0.58255	1.07765	1.43285	1.58982	1.52792	1.22828	0.699838	0.0340619	-0.64673	-1.21799	-1.55618	-1.55844	-1.22787	-0.683922	-0.0697495	0.482807	0.891442
0.578267	0.582561	0.561305	0.517655	0.456624	0.383319	0.302825	0.219953	0.137876	0.0572647	-0.0215325	-0.0982283	-0.17288	-0.24516	-0.314615	-0.380764	-0.442199	-0.494299	-0.53167	-0.548916	-0.540761	-0.503805	-0.440403	-0.355994	-0.256667	-0.148631	-0.0381612	0.0684607	0.165323	0.24846	0.316213	0.367417	0.400911	0.415531	0.410003	0.382619	0.331559	0.256721	0.164851	0.0645181	-0.0356781	-0.127138	-0.201262	-0.249451	-0.264303	-0.244903	-0.19828	-0.133175	-0.0583366	0.0174889
-0.246732	-0.243439	-0.237714	-0.229679	-0.219499	-0.207344	-0.193382	-0.17778	-0.160706	-0.142328	-0.122815	-0.102334	-0.0810528	-0.0591402	-0.0367638	-0.0140916	0.00870848	0.0314684	0.0540202	0.076193	0.097795	0.118593	0.138346	0.156809	0.173742	0.1889	0.202043	0.212926	0.221308	0.226947	0.229599	0.229021	0.224971	0.217206	0.205593	0.190437	0.172155	0.151165	0.127887	0.102739	0.0761389	0.0485067	0.0202608	-0.0081803	-0.0363977	-0.0639667	-0.090432	-0.115307	-0.138098	-0.158312
-0.0317097	-0.0315108	-0.0313184	-0.0311332	-0.0309555	-0.0307861	-0.0306253	-0.0304738	-0.0303321	-0.0302008	-0.0300803	-0.0299712	-0.0298741	-0.0297895	-0.0297179	-0.0296599	-0.029616	-0.0295868	-0.0295727	-0.0295744	-0.0295924	-0.0296272	-0.0296794	-0.0297494	-0.0298379	-0.0299454	-0.0300724	-0.0302194	-0.0303871	-0.0305759	-0.0307863	-0.0310188	-0.0312728	-0.0315475	-0.0318422	-0.032156	-0.0324882	-0.032838	-0.0332046	-0.0335872	-0.033985	-0.0343972	-0.0348231	-0.0352619	-0.0357127	-0.0361748	-0.0366474	-0.0371297	-0.0376209	-0.0381203
IMF1	IMF2	IMF3	IMF4	IMF5	Residual
-0.261678	-0.350152	0.192322	0.578267	-0.246732	-0.0317097
-0.687141	-0.445651	0.20665	0.582561	-0.243439	-0.0315108
-0.215877	-0.0753031	0.181603	0.561305	-0.237714	-0.0313184
0.626439	0.385821	0.115353	0.517655	-0.229679	-0.0311332
0.412114	0.457416	0.0114027	0.456624	-0.219499	-0.0309555
-0.127582	0.0823864	-0.10988	0.383319	-0.207344	-0.0307861
0.0803891	-0.369752	-0.197163	0.302825	-0.193382	-0.0306253
-0.84618	-0.373823	-0.199249	0.219953	-0.17778	-0.0304738
0.593663	0.0558675	-0.106727	0.137876	-0.160706	-0.0303321
0.565079	0.294567	0.0394385	0.0572647	-0.142328	-0.0302008
0.298851	0.0761049	0.17409	-0.0215325	-0.122815	-0.0300803
-0.978613	-0.0410352	0.211367	-0.0982283	-0.102334	-0.0299712
0.85931	0.15674	0.110188	-0.17288	-0.0810528	-0.0298741
0.0693596	0.150501	-0.0678489	-0.24516	-0.0591402	-0.0297895
-0.144596	-0.159002	-0.228614	-0.314615	-0.0367638	-0.0297179
-0.541334	-0.300551	-0.285712	-0.380764	-0.0140916	-0.0296599
0.477705	-0.124807	-0.188558	-0.442199	0.00870848	-0.029616
-0.0977836	0.0154289	0.0221931	-0.494299	0.0314684	-0.0295868
0.311147	0.0214117	0.261988	-0.53167	0.0540202	-0.0295727
-0.782442	0.271229	0.435678	-0.548916	0.076193	-0.0295744
0.839395	0.382128	0.504154	-0.540761	0.097795	-0.0295924
-0.81994	-0.148218	0.464703	-0.503805	0.118593	-0.0296272
0.250912	-0.448093	0.337594	-0.440403	0.138346	-0.0296794
-0.217806	-0.0623174	0.144408	-0.355994	0.156809	-0.0297494
-0.108353	0.40076	-0.116478	-0.256667	0.173742	-0.0298379
0.952278	0.371429	-0.440239	-0.148631	0.1889	-0.0299454
-0.325282	-0.108076	-0.771594	-0.0381612	0.202043	-0.0300724
-1.02642	-0.437677	-1.01765	0.0684607	0.212926	-0.0302194
0.904752	-0.24763	-1.09612	0.165323	0.221308	-0.0303871
0.249348	0.0777505	-0.996488	0.24846	0.226947	-0.0305759
-0.700684	0.278216	-0.745355	0.316213	0.229599	-0.0307863
0.243461	0.409078	-0.382108	0.367417	0.229021	-0.0310188
-0.311278	0.496732	0.0650578	0.400911	0.224971	-0.0312728
0.741811	0.0526744	0.58255	0.415531	0.217206	-0.0315475
-0.53678	-0.686782	1.07765	0.410003	0.205593	-0.0318422
-0.40622	-0.842114	1.43285	0.382619	0.190437	-0.032156
0.136183	-0.155103	1.58982	0.331559	0.172155	-0.0324882
0.643263	0.742462	1.52792	0.256721	0.151165	-0.032838
-0.00874761	1.18548	1.22828	0.164851	0.127887	-0.0332046
0.492281	1.0413	0.699838	0.0645181	0.102739	-0.0335872
-0.545716	0.597207	0.0340619	-0.0356781	0.0761389	-0.033985
0.439518	-0.0461427	-0.64673	-0.127138	0.0485067	-0.0343972
0.599764	-0.779911	-1.21799	-0.201262	0.0202608	-0.0348231
-0.640139	-1.36709	-1.55618	-0.249451	-0.0081803	-0.0352619
-1.12215	-1.38097	-1.55844	-0.264303	-0.0363977	-0.0357127
-0.271358	-0.596866	-1.22787	-0.244903	-0.0639667	-0.0361748
0.626578	0.497477	-0.683922	-0.19828	-0.090432	-0.0366474
0.73283	1.19441	-0.0697495	-0.133175	-0.115307	-0.0371297
0.743664	1.03978	0.482807	-0.0583366	-0.138098	-0.0376209
-0.202837	0.287143	0.891442	0.0174889	-0.158312	-0.0381203
-0.499155	-0.410361	1.10351	0.0855535	-0.175455	-0.038627
-0.191436	-0.558982	1.07813	0.13794	-0.189035	-0.0391402
0.160454	-0.203008	0.822036	0.170813	-0.198559	-0.0396593
0.10977	0.199957	0.438153	0.184197	-0.203533	-0.0401833
-0.0260691	0.305852	0.0504985	0.179028	-0.203617	-0.0407115
0.0481794	0.129879	-0.254429	0.156855	-0.199085	-0.0412431
-0.0069644	-0.12605	-0.442282	0.119403	-0.190386	-0.0417774
-0.0224421	-0.250533	-0.496694	0.068456	-0.177979	-0.0423134
-0.186881	-0.153364	-0.423101	0.0069141	-0.16232	-0.0428505
0.274903	0.0267634	-0.265114	-0.0584857	-0.143868	-0.0433879
0.0257169	0.0776139	-0.0812172	-0.119613	-0.12308	-0.0439248
-0.222439	0.0301959	0.0776757	-0.168213	-0.100413	-0.0444603
0.13231	0.00903215	0.177452	-0.196054	-0.0763271	-0.0449937
-0.000650205	0.0176264	0.198554	-0.195694	-0.0512732	-0.0455242
-0.0936708	0.0275916	0.139548	-0.164212	-0.025675	-0.0460511
0.137837	0.0395403	0.021405	-0.107	5.54866e-05	-0.0465735
-0.123561	0.0487853	-0.123871	-0.0330537	0.0255079	-0.0470906
0.0828073	0.0741265	-0.265203	0.0479309	0.0502716	-0.0476017
-0.0413204	0.106112	-0.38439	0.126481	0.0739362	-0.0481059
0.0209788	0.129984	-0.473891	0.193941	0.0960909	-0.0486026
-0.00789888	0.126661	-0.528749	0.243191	0.116325	-0.0490908
-0.0304708	0.0958266	-0.539987	0.269295	0.134229	-0.0495698
0.0430562	0.0333307	-0.490154	0.270414	0.149403	-0.0500389
-0.00396752	-0.0736971	-0.350337	0.248341	0.161593	-0.0504972
-0.0132679	-0.217391	-0.0895385	0.206769	0.170927	-0.0509439
0.00475415	-0.40409	0.305475	0.149985	0.177629	-0.0513783
0.0248514	-0.681556	0.804118	0.0823574	0.181923	-0.0517996
0.0284149	-1.04025	1.31176	0.00825307	0.184034	-0.0522069
0.0248874	-1.35266	1.68749	-0.06796	0.184185	-0.0525995
0.038992	-1.40731	1.79091	-0.141887	0.1826	-0.0529767
0.168839	-1.02636	1.54164	-0.209234	0.179504	-0.0533376
0.0860708	-0.204015	0.958423	-0.266523	0.17512	-0.0536814
-0.334078	0.986037	0.135703	-0.310486	0.169672	-0.0540073
-1.01403	2.52627	-0.791013	-0.337855	0.163384	-0.0543146
-1.84336	4.1533	-1.67357	-0.345363	0.156481	-0.0546025
-1.97461	4.77488	-2.3723	-0.32973	0.149174	-0.0548701
0.129743	3.04928	-2.78835	-0.28763	0.14163	-0.0551167
4.19498	-1.0432	-2.83187	-0.216659	0.134004	-0.0553416
-4.53595	-5.44016	-2.40748	-0.119802	0.126453	-0.0555439
4.65642	-5.62477	-1.44327	-0.00763825	0.119131	-0.0557228
0.45873	-1.16196	-0.043314	0.107588	0.112193	-0.0558775
-4.66693	4.05423	1.44343	0.213633	0.105795	-0.0560073
4.71044	5.81528	2.61398	0.298253	0.100092	-0.0561114
-4.04448	3.72266	3.12095	0.349203	0.0952397	-0.0561889
-3.99626	0.967116	2.84562	0.35716	0.0913924	-0.0562392
-3.41279	0.732418	1.76588	0.324528	0.0886601	-0.0562613
[truncated: 46 more columns]
