# Supplementary material for: Macroeconomic Imbalances and Financial Stress Among BRICS: Analysis of Frequency-Dependent and Asymmetric Causal Nexuses
Source: publisher site journal article supplement (doi:10.1515/snde-2024-0045), 2025-04-16
Supplement: Supplementary file 5 [file India.xlsx]

## Sheet: CA
-0.52754	0.0347702	0.270599	-0.25506	0.320872	-0.312216	0.122639	0.302617	-0.409711	0.0122324	-0.302006	0.776392	-0.928226	1.00042	-0.951334	-0.00695482	-0.100243	0.235818	0.703898	0.341878	-0.720295	-0.762066	0.857329	-0.17136	-0.400465	1.32135	-1.0982	-1.19169	1.18654	-0.58024	0.180004	-0.612116	0.632682	-0.292845	-0.323893	-0.0764476	0.410598	-0.39738	0.365956	0.549424	-1.27635	1.57119	-0.763135	-1.81211	0.787826	1.49444	0.286461	-0.258453	-0.715445	0.398888
-0.569186	-0.267092	0.132698	0.399228	0.459037	0.426964	0.316004	0.0317921	-0.310711	-0.368334	-0.0846759	0.185264	0.309075	0.187042	-0.220683	-0.307957	0.147133	0.573644	0.461841	-0.225468	-0.900401	-0.896434	-0.135542	0.778403	0.995494	0.24852	-0.645302	-0.697838	0.0578835	0.336403	-0.15883	-0.145207	0.165656	0.0418811	-0.166905	-0.066719	0.164078	0.206313	-0.0109914	-0.188137	-0.108864	0.00348263	-0.115265	-0.177713	0.0828104	0.356057	0.282201	-0.0915747	-0.421548	-0.443593
-0.227011	-0.0802567	0.0656775	0.172078	0.201907	0.137587	0.00208546	-0.148703	-0.251523	-0.247491	-0.115309	0.0937836	0.307671	0.447945	0.434236	0.22035	-0.154816	-0.513858	-0.680284	-0.611576	-0.338292	0.0821741	0.521409	0.809648	0.780789	0.377683	-0.18687	-0.639361	-0.770347	-0.564284	-0.11955	0.227372	0.341151	0.272075	0.1774	0.192902	0.277324	0.325341	0.27893	0.165276	0.0350167	-0.0659216	-0.116531	-0.162632	-0.246063	-0.346306	-0.425815	-0.443329	-0.355419	-0.133984
-0.983593	-1.02143	-1.05431	-1.08454	-1.11369	-1.14115	-1.16155	-1.1682	-1.15513	-1.11826	-1.05277	-0.953172	-0.814091	-0.630254	-0.398485	-0.126033	0.166541	0.450606	0.698135	0.890928	1.0167	1.0639	1.02036	0.872829	0.61708	0.284306	-0.0785142	-0.42254	-0.698965	-0.866103	-0.912699	-0.844597	-0.671533	-0.412851	-0.115137	0.170317	0.407269	0.584297	0.703516	0.775481	0.812077	0.825242	0.82596	0.820012	0.806381	0.776883	0.721046	0.629446	0.496549	0.323937
0.672255	0.743258	0.821609	0.907015	0.998703	1.09553	1.19611	1.29892	1.40233	1.50473	1.60449	1.70002	1.78974	1.87212	1.94564	2.00881	2.06009	2.09797	2.12095	2.1275	2.11611	2.08532	2.03426	1.96346	1.87399	1.767	1.64364	1.50505	1.35237	1.18675	1.00933	0.821414	0.624995	0.422362	0.216333	0.0098639	-0.194104	-0.392885	-0.584568	-0.767574	-0.940525	-1.10245	-1.25284	-1.39137	-1.51756	-1.63081	-1.73055	-1.81629	-1.88757	-1.944
-1.16478	-1.16517	-1.16591	-1.16698	-1.16839	-1.17012	-1.17217	-1.17454	-1.17721	-1.18018	-1.18345	-1.18701	-1.19084	-1.19496	-1.19934	-1.20398	-1.20888	-1.21403	-1.21943	-1.22506	-1.23092	-1.23701	-1.24331	-1.24982	-1.25655	-1.26347	-1.27058	-1.27788	-1.28536	-1.29301	-1.30083	-1.30881	-1.31694	-1.32522	-1.33365	-1.34221	-1.35089	-1.35971	-1.36863	-1.37767	-1.38681	-1.39605	-1.40538	-1.41479	-1.42428	-1.43384	-1.44347	-1.45316	-1.4629	-1.47269
IMF1	IMF2	IMF3	IMF4	IMF5	Residual
-0.52754	-0.569186	-0.227011	-0.983593	0.672255	-1.16478
0.0347702	-0.267092	-0.0802567	-1.02143	0.743258	-1.16517
0.270599	0.132698	0.0656775	-1.05431	0.821609	-1.16591
-0.25506	0.399228	0.172078	-1.08454	0.907015	-1.16698
0.320872	0.459037	0.201907	-1.11369	0.998703	-1.16839
-0.312216	0.426964	0.137587	-1.14115	1.09553	-1.17012
0.122639	0.316004	0.00208546	-1.16155	1.19611	-1.17217
0.302617	0.0317921	-0.148703	-1.1682	1.29892	-1.17454
-0.409711	-0.310711	-0.251523	-1.15513	1.40233	-1.17721
0.0122324	-0.368334	-0.247491	-1.11826	1.50473	-1.18018
-0.302006	-0.0846759	-0.115309	-1.05277	1.60449	-1.18345
0.776392	0.185264	0.0937836	-0.953172	1.70002	-1.18701
-0.928226	0.309075	0.307671	-0.814091	1.78974	-1.19084
1.00042	0.187042	0.447945	-0.630254	1.87212	-1.19496
-0.951334	-0.220683	0.434236	-0.398485	1.94564	-1.19934
-0.00695482	-0.307957	0.22035	-0.126033	2.00881	-1.20398
-0.100243	0.147133	-0.154816	0.166541	2.06009	-1.20888
0.235818	0.573644	-0.513858	0.450606	2.09797	-1.21403
0.703898	0.461841	-0.680284	0.698135	2.12095	-1.21943
0.341878	-0.225468	-0.611576	0.890928	2.1275	-1.22506
-0.720295	-0.900401	-0.338292	1.0167	2.11611	-1.23092
-0.762066	-0.896434	0.0821741	1.0639	2.08532	-1.23701
0.857329	-0.135542	0.521409	1.02036	2.03426	-1.24331
-0.17136	0.778403	0.809648	0.872829	1.96346	-1.24982
-0.400465	0.995494	0.780789	0.61708	1.87399	-1.25655
1.32135	0.24852	0.377683	0.284306	1.767	-1.26347
-1.0982	-0.645302	-0.18687	-0.0785142	1.64364	-1.27058
-1.19169	-0.697838	-0.639361	-0.42254	1.50505	-1.27788
1.18654	0.0578835	-0.770347	-0.698965	1.35237	-1.28536
-0.58024	0.336403	-0.564284	-0.866103	1.18675	-1.29301
0.180004	-0.15883	-0.11955	-0.912699	1.00933	-1.30083
-0.612116	-0.145207	0.227372	-0.844597	0.821414	-1.30881
0.632682	0.165656	0.341151	-0.671533	0.624995	-1.31694
-0.292845	0.0418811	0.272075	-0.412851	0.422362	-1.32522
-0.323893	-0.166905	0.1774	-0.115137	0.216333	-1.33365
-0.0764476	-0.066719	0.192902	0.170317	0.0098639	-1.34221
0.410598	0.164078	0.277324	0.407269	-0.194104	-1.35089
-0.39738	0.206313	0.325341	0.584297	-0.392885	-1.35971
0.365956	-0.0109914	0.27893	0.703516	-0.584568	-1.36863
0.549424	-0.188137	0.165276	0.775481	-0.767574	-1.37767
-1.27635	-0.108864	0.0350167	0.812077	-0.940525	-1.38681
1.57119	0.00348263	-0.0659216	0.825242	-1.10245	-1.39605
-0.763135	-0.115265	-0.116531	0.82596	-1.25284	-1.40538
-1.81211	-0.177713	-0.162632	0.820012	-1.39137	-1.41479
0.787826	0.0828104	-0.246063	0.806381	-1.51756	-1.42428
1.49444	0.356057	-0.346306	0.776883	-1.63081	-1.43384
0.286461	0.282201	-0.425815	0.721046	-1.73055	-1.44347
-0.258453	-0.0915747	-0.443329	0.629446	-1.81629	-1.45316
-0.715445	-0.421548	-0.355419	0.496549	-1.88757	-1.4629
0.398888	-0.443593	-0.133984	0.323937	-1.944	-1.47269
-0.612373	-0.0371063	0.193756	0.118886	-1.98526	-1.48251
0.357064	0.451734	0.529673	-0.106918	-2.01101	-1.49237
0.433608	0.538924	0.762757	-0.341414	-2.02093	-1.50226
-0.573035	0.143405	0.808886	-0.574261	-2.01468	-1.51217
0.291084	-0.347596	0.652934	-0.791154	-1.99194	-1.52209
0.362537	-0.41771	0.300208	-0.973217	-1.95238	-1.53202
-0.793803	0.0450596	-0.19588	-1.10066	-1.89567	-1.54195
0.607242	0.539896	-0.667281	-1.15354	-1.82166	-1.55188
0.60804	0.396405	-0.936166	-1.11102	-1.73106	-1.56179
-0.886978	-0.342021	-0.947938	-0.957201	-1.62546	-1.57169
0.876123	-0.862275	-0.678001	-0.702057	-1.5066	-1.58157
-1.01837	-0.323775	-0.162816	-0.374112	-1.37624	-1.59141
1.02617	0.626647	0.408444	-0.00509032	-1.23614	-1.60122
0.270867	0.836964	0.812142	0.373282	-1.08804	-1.61099
-0.183276	0.267594	0.881654	0.72931	-0.933687	-1.62071
-0.502962	-0.395347	0.651784	1.03323	-0.774846	-1.63037
-0.593557	-0.574659	0.223691	1.26355	-0.613263	-1.63997
0.132553	-0.270375	-0.27413	1.4051	-0.450691	-1.6495
0.481393	0.0147938	-0.641646	1.44459	-0.28886	-1.65895
0.0268759	-0.0696643	-0.712258	1.37052	-0.129245	-1.66833
-0.28328	-0.278764	-0.503883	1.18358	0.0273754	-1.67762
-0.0139716	-0.236009	-0.146658	0.908787	0.180485	-1.68681
-0.0613597	0.06629	0.218606	0.577026	0.329595	-1.69591
0.247634	0.311575	0.484736	0.218995	0.474215	-1.7049
-0.0453118	0.262125	0.582762	-0.137451	0.613857	-1.71377
-0.202286	-0.0158559	0.544629	-0.47409	0.748031	-1.72253
0.408364	-0.258043	0.447139	-0.781308	0.876247	-1.73116
-0.620906	-0.16864	0.352608	-1.05165	0.998016	-1.73966
0.613076	0.145677	0.249407	-1.27698	1.11285	-1.74802
-0.0701091	0.203861	0.107114	-1.44895	1.22026	-1.75624
-0.382595	-0.00202567	-0.0954109	-1.55938	1.31976	-1.7643
0.337741	-0.19808	-0.333593	-1.60052	1.41106	-1.77221
-0.207922	-0.118758	-0.556074	-1.56512	1.49425	-1.77995
-0.07238	0.184099	-0.681839	-1.44849	1.56945	-1.78753
0.342727	0.320411	-0.617546	-1.25717	1.63676	-1.79493
-0.46878	-0.0727008	-0.317909	-1.00729	1.69624	-1.80214
0.47011	-0.702121	0.106553	-0.716935	1.74799	-1.80917
0.692766	-0.766684	0.500181	-0.404252	1.79209	-1.816
-1.40059	0.139596	0.75996	-0.087384	1.82861	-1.82263
1.64462	1.17304	0.815752	0.215633	1.85765	-1.82905
0.151673	1.18605	0.623898	0.488571	1.87928	-1.83525
-1.28074	0.38644	0.238897	0.721338	1.89358	-1.84124
-1.76595	-0.662956	-0.221601	0.907561	1.90065	-1.847
1.86388	-1.4261	-0.629602	1.04146	1.90055	-1.85252
0.205251	-1.51109	-0.861636	1.11728	1.89337	-1.85781
-1.25272	-1.15756	-0.842719	1.13137	1.87921	-1.86284
[truncated: 46 more columns]

## Sheet: CGD
0.0069603	0.00234345	0.000238686	-0.00378371	0.000655659	0.000815421	-1.62826e-05	0.000487435	-0.000349646	-0.000218843	-2.48745e-05	0.000227654	-9.39055e-05	-0.000746756	-0.000706811	0.00200344	-0.000485456	-0.000417488	7.35881e-05	-8.26396e-05	3.28533e-05	-3.52744e-05	-3.22182e-05	0.00048705	-0.000123937	-0.000216805	-0.000137117	8.26526e-05	1.81321e-05	0.000176023	0.000111779	-0.000785433	0.000121397	0.000355692	0.000308507	-0.000442441	0.000946648	-0.000834911	-0.00566973	0.00709479	-0.000396648	-0.000826382	0.000248857	-0.00288998	0.000920249	0.000909888	0.000122556	-0.000277027	-3.45252e-05	-0.000145934
0.00254301	0.00261799	-0.00111715	-0.00451639	-0.00418711	-0.00111084	0.00184251	0.00284257	0.00188859	0.000106503	-0.00144646	-0.00211348	-0.0016543	-1.31068e-05	0.00217919	0.00328575	0.00227416	0.000199732	-0.00123706	-0.00144521	-0.000910799	-0.000178541	0.000501289	0.000795729	0.000552122	0.000178223	5.80547e-05	0.000169146	0.000137573	-9.83513e-05	-0.000351269	-0.000307429	-1.48378e-05	-0.000224168	-0.0015529	-0.00354563	-0.00476126	-0.00309599	0.0021735	0.00760364	0.0076702	0.00211026	-0.00442345	-0.00729469	-0.00550969	-0.00187636	0.00064271	0.00130413	0.00110545	0.00108618
-0.0162644	-0.0188181	-0.0203088	-0.0204862	-0.0191989	-0.0166022	-0.0130514	-0.00897508	-0.00476067	-0.000638148	0.00331125	0.00705509	0.0105028	0.0134196	0.015472	0.0163708	0.0160294	0.0146806	0.0127561	0.0107208	0.00893373	0.00754383	0.00649634	0.00561823	0.0046907	0.00353896	0.00206012	0.000252303	-0.00179107	-0.00390201	-0.00586035	-0.00740085	-0.00822738	-0.00803639	-0.00661018	-0.00399241	-0.000576483	0.0029149	0.0056142	0.00677374	0.00593881	0.00335438	-0.000100281	-0.00336764	-0.00550854	-0.00608838	-0.00518333	-0.00316683	-0.000602866	0.00194277
-0.00822407	-0.00881668	-0.00905151	-0.008891	-0.00833186	-0.00741303	-0.00619317	-0.00473598	-0.00310686	-0.00137259	0.000399476	0.00214334	0.00379554	0.00529529	0.00658433	0.00760988	0.00833056	0.00872305	0.00878313	0.00851842	0.00794416	0.00708619	0.00598447	0.00468943	0.00325776	0.00174799	0.000213963	-0.00129812	-0.00274948	-0.00410861	-0.00534941	-0.00645107	-0.007401	-0.00819529	-0.00883614	-0.00932384	-0.00965328	-0.00981264	-0.00978534	-0.00955583	-0.00911074	-0.00843803	-0.00752413	-0.00635476	-0.00491461	-0.00319349	-0.00120674	0.00098799	0.00330452	0.00564682
1.7544	1.75494	1.75535	1.75564	1.75579	1.75581	1.75569	1.75542	1.755	1.75443	1.75371	1.75282	1.75177	1.75055	1.74916	1.7476	1.74588	1.74401	1.74198	1.7398	1.73749	1.73505	1.73249	1.72982	1.72706	1.72421	1.72129	1.71831	1.71527	1.71218	1.70907	1.70593	1.70279	1.69965	1.69651	1.69341	1.69033	1.6873	1.68433	1.68142	1.67858	1.67583	1.67318	1.67064	1.66822	1.66592	1.66377	1.66177	1.65993	1.65825
IMF1	IMF2	IMF3	IMF4	Residual
0.0069603	0.00254301	-0.0162644	-0.00822407	1.7544
0.00234345	0.00261799	-0.0188181	-0.00881668	1.75494
0.000238686	-0.00111715	-0.0203088	-0.00905151	1.75535
-0.00378371	-0.00451639	-0.0204862	-0.008891	1.75564
0.000655659	-0.00418711	-0.0191989	-0.00833186	1.75579
0.000815421	-0.00111084	-0.0166022	-0.00741303	1.75581
-1.62826e-05	0.00184251	-0.0130514	-0.00619317	1.75569
0.000487435	0.00284257	-0.00897508	-0.00473598	1.75542
-0.000349646	0.00188859	-0.00476067	-0.00310686	1.755
-0.000218843	0.000106503	-0.000638148	-0.00137259	1.75443
-2.48745e-05	-0.00144646	0.00331125	0.000399476	1.75371
0.000227654	-0.00211348	0.00705509	0.00214334	1.75282
-9.39055e-05	-0.0016543	0.0105028	0.00379554	1.75177
-0.000746756	-1.31068e-05	0.0134196	0.00529529	1.75055
-0.000706811	0.00217919	0.015472	0.00658433	1.74916
0.00200344	0.00328575	0.0163708	0.00760988	1.7476
-0.000485456	0.00227416	0.0160294	0.00833056	1.74588
-0.000417488	0.000199732	0.0146806	0.00872305	1.74401
7.35881e-05	-0.00123706	0.0127561	0.00878313	1.74198
-8.26396e-05	-0.00144521	0.0107208	0.00851842	1.7398
3.28533e-05	-0.000910799	0.00893373	0.00794416	1.73749
-3.52744e-05	-0.000178541	0.00754383	0.00708619	1.73505
-3.22182e-05	0.000501289	0.00649634	0.00598447	1.73249
0.00048705	0.000795729	0.00561823	0.00468943	1.72982
-0.000123937	0.000552122	0.0046907	0.00325776	1.72706
-0.000216805	0.000178223	0.00353896	0.00174799	1.72421
-0.000137117	5.80547e-05	0.00206012	0.000213963	1.72129
8.26526e-05	0.000169146	0.000252303	-0.00129812	1.71831
1.81321e-05	0.000137573	-0.00179107	-0.00274948	1.71527
0.000176023	-9.83513e-05	-0.00390201	-0.00410861	1.71218
0.000111779	-0.000351269	-0.00586035	-0.00534941	1.70907
-0.000785433	-0.000307429	-0.00740085	-0.00645107	1.70593
0.000121397	-1.48378e-05	-0.00822738	-0.007401	1.70279
0.000355692	-0.000224168	-0.00803639	-0.00819529	1.69965
0.000308507	-0.0015529	-0.00661018	-0.00883614	1.69651
-0.000442441	-0.00354563	-0.00399241	-0.00932384	1.69341
0.000946648	-0.00476126	-0.000576483	-0.00965328	1.69033
-0.000834911	-0.00309599	0.0029149	-0.00981264	1.6873
-0.00566973	0.0021735	0.0056142	-0.00978534	1.68433
0.00709479	0.00760364	0.00677374	-0.00955583	1.68142
-0.000396648	0.0076702	0.00593881	-0.00911074	1.67858
-0.000826382	0.00211026	0.00335438	-0.00843803	1.67583
0.000248857	-0.00442345	-0.000100281	-0.00752413	1.67318
-0.00288998	-0.00729469	-0.00336764	-0.00635476	1.67064
0.000920249	-0.00550969	-0.00550854	-0.00491461	1.66822
0.000909888	-0.00187636	-0.00608838	-0.00319349	1.66592
0.000122556	0.00064271	-0.00518333	-0.00120674	1.66377
-0.000277027	0.00130413	-0.00316683	0.00098799	1.66177
-3.45252e-05	0.00110545	-0.000602866	0.00330452	1.65993
-0.000145934	0.00108618	0.00194277	0.00564682	1.65825
-0.00019354	0.00133725	0.00405283	0.00791577	1.65675
0.000781905	0.00123985	0.00547877	0.010012	1.65544
-0.000167613	0.000596841	0.00611717	0.0118399	1.65431
-0.000335444	9.58318e-05	0.00598587	0.013317	1.65338
-0.000206245	0.000164941	0.00519435	0.0143836	1.65265
0.000412877	0.000462168	0.00391968	0.0150063	1.65213
-0.000149507	0.000462269	0.00238618	0.0151757	1.65182
-5.77665e-05	6.11892e-05	0.000833334	0.0149016	1.65173
7.64866e-05	-0.000400651	-0.000483765	0.0142061	1.65183
-0.000320616	-0.000579415	-0.00135643	0.0131186	1.65214
0.00015132	-0.000371327	-0.00167647	0.0116742	1.65262
0.000141861	-9.36269e-05	-0.00144645	0.00991424	1.65329
5.79435e-05	-6.88907e-05	-0.000787472	0.00788472	1.65413
4.04406e-05	-0.000247492	7.19908e-05	0.00563307	1.65512
-3.24081e-05	-0.00024295	0.000850735	0.00320622	1.65626
-0.000270696	0.000287808	0.00126172	0.000646642	1.65754
-0.000223341	0.00107353	0.00109705	-0.00200789	1.65896
0.000934367	0.00132128	0.00030313	-0.00472548	1.66049
0.00015148	0.000448607	-0.000992529	-0.00747783	1.66213
3.13031e-05	-0.000962549	-0.00251328	-0.0102285	1.66387
-0.000984544	-0.00168823	-0.00396411	-0.0129278	1.6657
0.000205148	-0.00117642	-0.00515149	-0.0155081	1.66761
0.000268256	-7.86614e-05	-0.00607459	-0.0178801	1.66958
3.9751e-05	0.000849453	-0.00690511	-0.0199411	1.67162
-0.00012034	0.00142508	-0.00791093	-0.0215907	1.6737
-0.000157993	0.00172363	-0.00930589	-0.022735	1.67582
5.71167e-05	0.00157957	-0.0111327	-0.0232865	1.67797
0.000464079	0.00081232	-0.0132158	-0.0231683	1.68014
0.000267948	-0.00019079	-0.0151986	-0.0223167	1.68231
-0.00179773	-0.000667098	-0.0166076	-0.0206878	1.68447
0.000277692	-0.000691665	-0.016904	-0.0182672	1.68661
0.00115571	-0.00184976	-0.0155909	-0.0150888	1.68872
0.00106942	-0.00453096	-0.0123981	-0.0112518	1.69077
-0.00228208	-0.00618313	-0.00741034	-0.006909	1.69276
0.000593863	-0.00398405	-0.00111785	-0.00223488	1.69467
-0.000447382	0.0016552	0.00559247	0.0025913	1.69649
-0.000982145	0.00753748	0.0116878	0.00738985	1.6982
0.00415489	0.00968249	0.0161766	0.0119815	1.69979
-0.0013832	0.00641589	0.0184103	0.0161906	1.70125
-0.00145136	0.000595187	0.0184228	0.0198541	1.70255
-0.000249375	-0.00395209	0.0167484	0.0228243	1.7037
0.000346204	-0.0060017	0.0141794	0.024975	1.70466
0.000356315	-0.00631826	0.0115532	0.0262268	1.70544
0.000187073	-0.00596279	0.0095586	0.0265595	1.706
-0.000258671	-0.00522366	0.00856836	0.0259957	1.70636
-0.00136821	-0.00378904	0.00859599	0.0245931	1.7065
[truncated: 46 more columns]

## Sheet: FSI
0.265649	-0.000896588	-0.137808	0.101796	-0.270362	-0.0550698	0.433546	-0.0913189	-0.446833	-0.115643	0.397608	0.193194	-0.353668	0.025604	0.26451	-0.319161	0.274321	0.0745469	-0.283397	-0.144163	-0.146009	-0.0309398	0.538505	-0.525655	0.0908464	0.31489	-0.400845	0.489295	-0.488399	0.17258	0.334621	-0.20923	0.0390483	0.124897	-0.217253	0.00229811	-0.384375	0.273388	0.241261	0.635212	-0.564511	-0.420486	-0.0267999	0.0783611	-0.0230591	0.239651	-0.161494	0.0755111	0.0204606	-0.334795
0.0775562	0.00336	-0.115912	-0.154308	-0.0489386	0.0947229	0.133025	0.0107435	-0.109804	-0.0781264	0.00957487	0.0106379	-0.0385886	-0.0254761	0.0791424	0.192553	0.162189	-0.0462978	-0.268567	-0.255789	0.0326203	0.312401	0.257886	-0.121147	-0.310751	-0.114698	0.275541	0.276114	-0.0575597	-0.165441	-0.0534267	0.023848	-0.124126	-0.411821	-0.645829	-0.622734	-0.220062	0.426612	0.859275	0.615745	-0.116699	-0.689905	-0.764443	-0.453435	-0.0834618	0.0350522	-0.113505	-0.259107	-0.20156	0.0472434
-0.240723	-0.265301	-0.263028	-0.227431	-0.160405	-0.0767037	0.00706222	0.0803699	0.141713	0.192828	0.238167	0.279417	0.305631	0.299099	0.247381	0.148341	0.0113668	-0.138804	-0.271731	-0.35769	-0.376343	-0.325536	-0.206737	-0.035621	0.15508	0.328371	0.434059	0.422518	0.274368	0.0286522	-0.244764	-0.447633	-0.504248	-0.414773	-0.216394	0.0421552	0.303066	0.502467	0.575321	0.478453	0.257104	-0.0209505	-0.289034	-0.490902	-0.594472	-0.57592	-0.427391	-0.198737	0.0479678	0.269226
0.94844	0.960514	0.955915	0.933096	0.89132	0.830647	0.751676	0.655697	0.544617	0.420673	0.286373	0.144688	-0.000687872	-0.145583	-0.285597	-0.41633	-0.533534	-0.63304	-0.71069	-0.762341	-0.784049	-0.773472	-0.732375	-0.66454	-0.573955	-0.464577	-0.340358	-0.205292	-0.0641261	0.0758243	0.205902	0.317264	0.401617	0.454145	0.476156	0.470379	0.439634	0.387023	0.315918	0.230529	0.137052	0.0421637	-0.0474577	-0.125139	-0.184253	-0.21961	-0.231692	-0.223972	-0.200608	-0.165914
0.809028	0.751978	0.688566	0.619388	0.545229	0.466884	0.385152	0.300829	0.214713	0.1276	0.0402883	-0.0464253	-0.131744	-0.21487	-0.295006	-0.371356	-0.443122	-0.509507	-0.569714	-0.622945	-0.668406	-0.705381	-0.733529	-0.752957	-0.76393	-0.766734	-0.761653	-0.748974	-0.728985	-0.701977	-0.668241	-0.628066	-0.581744	-0.529564	-0.471817	-0.408801	-0.340903	-0.26879	-0.193342	-0.115588	-0.0366334	0.0424036	0.120402	0.196247	0.268868	0.337353	0.401008	0.459423	0.512515	0.560357
0.385551	0.383649	0.381473	0.379026	0.376309	0.373325	0.370077	0.366566	0.362797	0.35877	0.354489	0.349956	0.345174	0.340144	0.33487	0.329353	0.323597	0.317604	0.311376	0.304916	0.298226	0.291309	0.284167	0.276802	0.269218	0.261417	0.2534	0.245173	0.236742	0.228115	0.219301	0.210307	0.201142	0.191815	0.182332	0.172704	0.162936	0.153039	0.143019	0.132886	0.122647	0.11231	0.101884	0.0913767	0.0807965	0.0701515	0.0594499	0.0486998	0.0379094	0.0270869
IMF1	IMF2	IMF3	IMF4	IMF5	Residual
0.265649	0.0775562	-0.240723	0.94844	0.809028	0.385551
-0.000896588	0.00336	-0.265301	0.960514	0.751978	0.383649
-0.137808	-0.115912	-0.263028	0.955915	0.688566	0.381473
0.101796	-0.154308	-0.227431	0.933096	0.619388	0.379026
-0.270362	-0.0489386	-0.160405	0.89132	0.545229	0.376309
-0.0550698	0.0947229	-0.0767037	0.830647	0.466884	0.373325
0.433546	0.133025	0.00706222	0.751676	0.385152	0.370077
-0.0913189	0.0107435	0.0803699	0.655697	0.300829	0.366566
-0.446833	-0.109804	0.141713	0.544617	0.214713	0.362797
-0.115643	-0.0781264	0.192828	0.420673	0.1276	0.35877
0.397608	0.00957487	0.238167	0.286373	0.0402883	0.354489
0.193194	0.0106379	0.279417	0.144688	-0.0464253	0.349956
-0.353668	-0.0385886	0.305631	-0.000687872	-0.131744	0.345174
0.025604	-0.0254761	0.299099	-0.145583	-0.21487	0.340144
0.26451	0.0791424	0.247381	-0.285597	-0.295006	0.33487
-0.319161	0.192553	0.148341	-0.41633	-0.371356	0.329353
0.274321	0.162189	0.0113668	-0.533534	-0.443122	0.323597
0.0745469	-0.0462978	-0.138804	-0.63304	-0.509507	0.317604
-0.283397	-0.268567	-0.271731	-0.71069	-0.569714	0.311376
-0.144163	-0.255789	-0.35769	-0.762341	-0.622945	0.304916
-0.146009	0.0326203	-0.376343	-0.784049	-0.668406	0.298226
-0.0309398	0.312401	-0.325536	-0.773472	-0.705381	0.291309
0.538505	0.257886	-0.206737	-0.732375	-0.733529	0.284167
-0.525655	-0.121147	-0.035621	-0.66454	-0.752957	0.276802
0.0908464	-0.310751	0.15508	-0.573955	-0.76393	0.269218
0.31489	-0.114698	0.328371	-0.464577	-0.766734	0.261417
-0.400845	0.275541	0.434059	-0.340358	-0.761653	0.2534
0.489295	0.276114	0.422518	-0.205292	-0.748974	0.245173
-0.488399	-0.0575597	0.274368	-0.0641261	-0.728985	0.236742
0.17258	-0.165441	0.0286522	0.0758243	-0.701977	0.228115
0.334621	-0.0534267	-0.244764	0.205902	-0.668241	0.219301
-0.20923	0.023848	-0.447633	0.317264	-0.628066	0.210307
0.0390483	-0.124126	-0.504248	0.401617	-0.581744	0.201142
0.124897	-0.411821	-0.414773	0.454145	-0.529564	0.191815
-0.217253	-0.645829	-0.216394	0.476156	-0.471817	0.182332
0.00229811	-0.622734	0.0421552	0.470379	-0.408801	0.172704
-0.384375	-0.220062	0.303066	0.439634	-0.340903	0.162936
0.273388	0.426612	0.502467	0.387023	-0.26879	0.153039
0.241261	0.859275	0.575321	0.315918	-0.193342	0.143019
0.635212	0.615745	0.478453	0.230529	-0.115588	0.132886
-0.564511	-0.116699	0.257104	0.137052	-0.0366334	0.122647
-0.420486	-0.689905	-0.0209505	0.0421637	0.0424036	0.11231
-0.0267999	-0.764443	-0.289034	-0.0474577	0.120402	0.101884
0.0783611	-0.453435	-0.490902	-0.125139	0.196247	0.0913767
-0.0230591	-0.0834618	-0.594472	-0.184253	0.268868	0.0807965
0.239651	0.0350522	-0.57592	-0.21961	0.337353	0.0701515
-0.161494	-0.113505	-0.427391	-0.231692	0.401008	0.0594499
0.0755111	-0.259107	-0.198737	-0.223972	0.459423	0.0486998
0.0204606	-0.20156	0.0479678	-0.200608	0.512515	0.0379094
-0.334795	0.0472434	0.269226	-0.165914	0.560357	0.0270869
0.230487	0.281175	0.435529	-0.124232	0.603052	0.0162405
0.462497	0.331061	0.522948	-0.0799064	0.640702	0.00537826
-0.529406	0.167256	0.525483	-0.0371018	0.673413	-0.00549153
0.483771	-0.0472278	0.463689	0.00113568	0.701289	-0.0163607
-0.3975	-0.22547	0.363311	0.0335695	0.724434	-0.0272211
0.206876	-0.20665	0.245673	0.059556	0.742949	-0.0380646
-0.170854	0.0491749	0.123359	0.0785112	0.756927	-0.048883
0.154737	0.213737	0.0139201	0.0898582	0.766454	-0.059668
0.164908	0.110157	-0.0672781	0.0930314	0.771616	-0.0704116
-0.283184	-0.11199	-0.115854	0.0875816	0.772482	-0.0811056
-0.0275865	-0.157091	-0.131747	0.0736259	0.769006	-0.0917417
-0.0308864	-0.00203292	-0.118605	0.0524007	0.761068	-0.102312
0.232274	0.114243	-0.0886051	0.0264265	0.748528	-0.112808
0.112612	0.0570962	-0.0555349	-0.00106104	0.731239	-0.123221
-0.250563	-0.0587154	-0.0286886	-0.0267171	0.709055	-0.133544
-0.0474799	-0.0657668	-0.0149592	-0.0475106	0.681829	-0.143769
0.222467	0.0140734	-0.0206236	-0.0610064	0.649426	-0.153886
-0.150486	0.0622629	-0.0481509	-0.0658862	0.611759	-0.163889
0.115842	0.0457972	-0.0973566	-0.0623057	0.568864	-0.173768
-0.0306464	0.0393628	-0.16452	-0.0514357	0.52092	-0.183516
-0.158487	0.0734208	-0.238121	-0.0349112	0.468219	-0.193124
0.248949	0.0674778	-0.297191	-0.0145319	0.41112	-0.202584
-0.222113	-0.0663875	-0.32096	0.00784906	0.350016	-0.211889
0.00676231	-0.219335	-0.296432	0.0304107	0.28531	-0.221029
0.16276	-0.27849	-0.217748	0.0515734	0.217407	-0.229997
-0.0967599	-0.189054	-0.092109	0.0702232	0.146713	-0.238785
-0.229577	0.055181	0.055348	0.0854642	0.0736364	-0.247384
0.208901	0.305477	0.194542	0.0964129	-0.00138766	-0.255786
0.125993	0.31635	0.298407	0.102095	-0.0778589	-0.263984
-0.16942	0.0838263	0.355224	0.101412	-0.155143	-0.271968
-0.0574295	-0.166638	0.37128	0.0934486	-0.232435	-0.27973
-0.0515245	-0.267354	0.355952	0.0782877	-0.308834	-0.287263
0.280329	-0.204889	0.316115	0.0570034	-0.383412	-0.294559
-0.413745	0.0209443	0.253088	0.0310936	-0.455227	-0.301609
0.453383	0.186509	0.170376	0.00222924	-0.523341	-0.308404
-0.237522	0.0689582	0.0716649	-0.0278467	-0.586812	-0.314937
-0.297664	-0.101587	-0.0418772	-0.0573548	-0.644702	-0.3212
0.127991	-0.100492	-0.166909	-0.0844944	-0.696071	-0.327185
0.115275	0.0246053	-0.288316	-0.10746	-0.739984	-0.332882
-0.0772838	0.10217	-0.382151	-0.124453	-0.775504	-0.338285
0.146235	0.0249988	-0.43067	-0.133668	-0.801718	-0.343385
-0.0696685	-0.128374	-0.430731	-0.133465	-0.81785	-0.348173
-0.18046	-0.181555	-0.385467	-0.123234	-0.823619	-0.352642
-0.167814	-0.0346544	-0.307065	-0.103782	-0.819402	-0.356783
0.319143	0.160086	-0.218402	-0.0762407	-0.805817	-0.360589
0.382032	0.186849	-0.141971	-0.0417519	-0.78351	-0.36405
[truncated: 46 more columns]

## Sheet: OGAP
0.0478352	-0.195452	0.310201	-0.30534	-0.18311	0.677179	-0.573811	-0.040069	0.65967	-0.847339	0.759718	-0.446466	-0.315239	0.628926	-0.575311	0.609356	-0.345529	0.0481829	0.266914	-0.629526	0.541754	-0.132926	-0.241784	1.03704	-1.20108	0.724712	0.3629	-0.25824	-0.505148	0.894166	-0.7964	0.403474	0.373242	-0.805114	0.877143	-0.739943	0.407697	0.130254	-0.712567	0.924187	-1.14469	0.439582	1.27551	0.834516	-2.57279	2.51507	-1.45214	-1.0552	0.137424	-0.132091
-0.0790112	-0.155802	-0.18118	-0.105434	0.0672167	0.192397	0.193231	0.20682	0.119512	-0.193362	-0.504325	-0.529265	-0.145959	0.447616	0.80064	0.668508	0.113837	-0.525912	-0.907014	-0.738986	0.00624192	0.725945	0.77542	0.0921995	-0.569196	-0.429831	-0.00722328	0.155444	0.184152	0.151959	0.0135235	-0.108637	-0.173947	-0.161502	-0.0864449	-0.144745	-0.187285	0.023576	0.538467	0.996813	0.812713	0.0648407	-0.796256	-1.33195	-0.544715	1.1782	1.15928	-0.100115	-0.882213	-0.494688
-0.0565421	-0.0644755	-0.0330593	0.0285001	0.0917191	0.127614	0.120541	0.0695394	0.00141617	-0.0504027	-0.0710811	-0.0595768	-0.0306079	-0.00765992	-0.00740659	-0.0345328	-0.0743499	-0.0984884	-0.0766618	0.00704526	0.120137	0.206156	0.211729	0.120181	-0.0328738	-0.199108	-0.329761	-0.39099	-0.38373	-0.326917	-0.232846	-0.103086	0.0685242	0.28537	0.528432	0.750839	0.862309	0.778243	0.483611	0.0462661	-0.432363	-0.836503	-1.04393	-0.930433	-0.436855	0.222308	0.779414	1.05633	1.0003	0.615713
0.451356	0.470443	0.46831	0.443215	0.394802	0.323921	0.233318	0.127933	0.0142166	-0.100866	-0.210404	-0.308225	-0.389293	-0.449444	-0.485637	-0.49633	-0.481249	-0.441409	-0.379466	-0.299242	-0.204659	-0.0995768	0.0116897	0.123111	0.22796	0.320173	0.394219	0.445353	0.471043	0.471317	0.446453	0.397108	0.325218	0.235122	0.133265	0.027055	-0.0762917	-0.170997	-0.251712	-0.312773	-0.348416	-0.352637	-0.318306	-0.241065	-0.133072	-0.0113013	0.10711	0.205025	0.266519	0.28353
0.117348	0.117027	0.120574	0.128062	0.138928	0.152449	0.167894	0.184533	0.201635	0.218469	0.234304	0.248409	0.260052	0.268505	0.273046	0.273103	0.268562	0.25956	0.246282	0.228921	0.207672	0.182732	0.154298	0.122567	0.0877368	0.0500051	0.00956922	-0.0333729	-0.0785972	-0.125642	-0.173438	-0.22066	-0.265952	-0.307957	-0.34532	-0.376685	-0.400695	-0.415995	-0.421239	-0.415125	-0.396379	-0.363968	-0.318042	-0.260372	-0.193083	-0.1183	-0.0381494	0.0452428	0.129751	0.213249
-0.342706	-0.336215	-0.328813	-0.320579	-0.311537	-0.301711	-0.291125	-0.279802	-0.267768	-0.255045	-0.241658	-0.22763	-0.212986	-0.19775	-0.181945	-0.165602	-0.14877	-0.131519	-0.113938	-0.0961192	-0.0781559	-0.0601444	-0.0421812	-0.0243631	-0.00678694	0.0104506	0.0272528	0.0435229	0.059164	0.0740794	0.0881724	0.101346	0.113504	0.124549	0.134384	0.142914	0.15004	0.155666	0.159707	0.162118	0.162877	0.161957	0.159336	0.154989	0.148892	0.141019	0.131347	0.119851	0.106507	0.0912899
IMF1	IMF2	IMF3	IMF4	IMF5	Residual
0.0478352	-0.0790112	-0.0565421	0.451356	0.117348	-0.342706
-0.195452	-0.155802	-0.0644755	0.470443	0.117027	-0.336215
0.310201	-0.18118	-0.0330593	0.46831	0.120574	-0.328813
-0.30534	-0.105434	0.0285001	0.443215	0.128062	-0.320579
-0.18311	0.0672167	0.0917191	0.394802	0.138928	-0.311537
0.677179	0.192397	0.127614	0.323921	0.152449	-0.301711
-0.573811	0.193231	0.120541	0.233318	0.167894	-0.291125
-0.040069	0.20682	0.0695394	0.127933	0.184533	-0.279802
0.65967	0.119512	0.00141617	0.0142166	0.201635	-0.267768
-0.847339	-0.193362	-0.0504027	-0.100866	0.218469	-0.255045
0.759718	-0.504325	-0.0710811	-0.210404	0.234304	-0.241658
-0.446466	-0.529265	-0.0595768	-0.308225	0.248409	-0.22763
-0.315239	-0.145959	-0.0306079	-0.389293	0.260052	-0.212986
0.628926	0.447616	-0.00765992	-0.449444	0.268505	-0.19775
-0.575311	0.80064	-0.00740659	-0.485637	0.273046	-0.181945
0.609356	0.668508	-0.0345328	-0.49633	0.273103	-0.165602
-0.345529	0.113837	-0.0743499	-0.481249	0.268562	-0.14877
0.0481829	-0.525912	-0.0984884	-0.441409	0.25956	-0.131519
0.266914	-0.907014	-0.0766618	-0.379466	0.246282	-0.113938
-0.629526	-0.738986	0.00704526	-0.299242	0.228921	-0.0961192
0.541754	0.00624192	0.120137	-0.204659	0.207672	-0.0781559
-0.132926	0.725945	0.206156	-0.0995768	0.182732	-0.0601444
-0.241784	0.77542	0.211729	0.0116897	0.154298	-0.0421812
1.03704	0.0921995	0.120181	0.123111	0.122567	-0.0243631
-1.20108	-0.569196	-0.0328738	0.22796	0.0877368	-0.00678694
0.724712	-0.429831	-0.199108	0.320173	0.0500051	0.0104506
0.3629	-0.00722328	-0.329761	0.394219	0.00956922	0.0272528
-0.25824	0.155444	-0.39099	0.445353	-0.0333729	0.0435229
-0.505148	0.184152	-0.38373	0.471043	-0.0785972	0.059164
0.894166	0.151959	-0.326917	0.471317	-0.125642	0.0740794
-0.7964	0.0135235	-0.232846	0.446453	-0.173438	0.0881724
0.403474	-0.108637	-0.103086	0.397108	-0.22066	0.101346
0.373242	-0.173947	0.0685242	0.325218	-0.265952	0.113504
-0.805114	-0.161502	0.28537	0.235122	-0.307957	0.124549
0.877143	-0.0864449	0.528432	0.133265	-0.34532	0.134384
-0.739943	-0.144745	0.750839	0.027055	-0.376685	0.142914
0.407697	-0.187285	0.862309	-0.0762917	-0.400695	0.15004
0.130254	0.023576	0.778243	-0.170997	-0.415995	0.155666
-0.712567	0.538467	0.483611	-0.251712	-0.421239	0.159707
0.924187	0.996813	0.0462661	-0.312773	-0.415125	0.162118
-1.14469	0.812713	-0.432363	-0.348416	-0.396379	0.162877
0.439582	0.0648407	-0.836503	-0.352637	-0.363968	0.161957
1.27551	-0.796256	-1.04393	-0.318306	-0.318042	0.159336
0.834516	-1.33195	-0.930433	-0.241065	-0.260372	0.154989
-2.57279	-0.544715	-0.436855	-0.133072	-0.193083	0.148892
2.51507	1.1782	0.222308	-0.0113013	-0.1183	0.141019
-1.45214	1.15928	0.779414	0.10711	-0.0381494	0.131347
-1.0552	-0.100115	1.05633	0.205025	0.0452428	0.119851
0.137424	-0.882213	1.0003	0.266519	0.129751	0.106507
-0.132091	-0.494688	0.615713	0.28353	0.213249	0.0912899
0.255588	0.215154	0.0495332	0.261255	0.293562	0.074176
-0.0915455	0.494095	-0.498896	0.208047	0.368385	0.0551406
0.121158	0.233378	-0.889893	0.131992	0.435686	0.0341594
0.23464	-0.223268	-1.08878	0.0408949	0.49376	0.0112078
-0.706966	-0.385234	-1.10628	-0.0571765	0.541002	-0.0137385
0.609402	-0.0908436	-0.981071	-0.153152	0.575818	-0.0407039
0.0134016	0.159751	-0.780505	-0.236827	0.59661	-0.06971
-0.330827	0.16878	-0.57364	-0.297883	0.60176	-0.100758
0.311644	0.0721151	-0.405646	-0.326655	0.589583	-0.13378
-0.255758	-0.0303511	-0.287627	-0.315689	0.558584	-0.168595
0.164801	-0.08934	-0.206253	-0.263166	0.508816	-0.204993
-0.107719	-0.0667065	-0.142098	-0.172847	0.442168	-0.242767
-0.0665208	0.0242906	-0.0848269	-0.0516441	0.361196	-0.281708
0.440467	0.05338	-0.0385183	0.0907637	0.269024	-0.321607
-0.613008	0.021055	-0.0123543	0.241744	0.169164	-0.362256
0.46344	0.0635035	-0.00558614	0.385738	0.0651652	-0.403447
0.0402558	0.0393548	-0.000158412	0.505802	-0.0396438	-0.444971
-0.163493	-0.0248794	0.0385869	0.585574	-0.142174	-0.48662
-0.070841	0.0317841	0.153608	0.611908	-0.239666	-0.528186
0.248897	0.118231	0.374007	0.579931	-0.330473	-0.569459
-0.176171	0.136245	0.704854	0.494216	-0.413728	-0.610231
-0.201781	0.178205	1.13442	0.364196	-0.488702	-0.650294
0.495976	0.141456	1.63255	0.199948	-0.554665	-0.68944
-0.490826	-0.198	2.14549	0.011419	-0.610885	-0.72746
0.449216	-0.785673	2.61955	-0.191592	-0.656633	-0.764146
-0.0176194	-1.36195	3.04681	-0.399221	-0.691178	-0.799288
-0.462157	-1.58428	3.44489	-0.600868	-0.71379	-0.832679
0.515571	-1.41288	3.81994	-0.784806	-0.723739	-0.864111
-0.193477	-1.18265	4.1097	-0.938895	-0.720273	-0.893397
-0.141066	-0.879941	4.15019	-1.05248	-0.702549	-0.92044
0.0821638	-0.3243	3.74283	-1.12178	-0.66969	-0.945192
-0.730688	0.678658	2.75574	-1.14733	-0.62117	-0.967614
-0.997628	2.53187	1.23635	-1.1294	-0.557902	-0.987665
-1.61752	4.95307	-0.572858	-1.06725	-0.481918	-1.00531
-1.79097	6.34039	-2.38548	-0.959911	-0.395452	-1.0205
1.20565	5.10897	-3.94944	-0.806428	-0.300742	-1.0332
5.56646	0.662479	-5.03913	-0.605838	-0.200024	-1.04337
11.5107	-5.64038	-5.43726	-0.35731	-0.0955357	-1.05098
13.6314	-8.73498	-4.92316	-0.0644591	0.0104866	-1.05597
-16.1458	-3.60404	-3.38054	0.253196	0.115806	-1.05832
15.9218	6.75948	-1.1704	0.572196	0.218185	-1.05798
-6.3813	9.97483	1.22596	0.86908	0.315387	-1.05492
-9.51992	5.64664	3.36767	1.12039	0.405175	-1.04908
-11.8812	-2.80146	4.97568	1.30266	0.485312	-1.04044
11.4998	-10.3781	5.81137	1.39243	0.553561	-1.02896
2.23243	-8.45047	5.70286	1.37205	0.608127	-1.01458
[truncated: 46 more columns]
