# Supplementary material for: Macroeconomic Imbalances and Financial Stress Among BRICS: Analysis of Frequency-Dependent and Asymmetric Causal Nexuses
Source: publisher site journal article supplement (doi:10.1515/snde-2024-0045), 2025-04-16
Supplement: Supplementary file 6 [file Russia.xlsx]

## Sheet: CA
-0.100596	-0.0161535	0.0041721	0.00578257	0.00880931	0.00610082	9.86541e-05	-5.6786e-05	-0.000579557	-0.0027555	-0.00281194	-0.00290175	-0.00202694	0.000516985	0.0022448	0.0057695	0.0247093	0.0176771	-0.106283	-0.292417	-0.0695206	1.14432	-1.11465	0.120815	-0.0479731	0.457938	-0.413602	0.0908176	0.412838	-0.499444	0.629207	-0.818224	-0.0541194	0.962188	-0.896298	0.708788	-0.540483	0.550829	-0.369507	-0.5139	0.579304	0.398302	-0.523497	0.945026	0.487065	-1.31482	-0.921804	1.24813	-0.203602	0.887941
-0.0511898	-0.0488786	-0.0178625	0.00120862	-0.00172881	-0.00915702	-0.0145175	-0.0199728	-0.0163499	-0.00410522	0.00695962	0.00794036	-0.0167421	-0.0792249	-0.175141	-0.283608	-0.369947	-0.321624	0.0215794	0.631669	1.02301	0.549177	-0.578383	-1.10196	-0.717703	-0.042476	0.51216	0.770068	0.577963	-0.0129221	-0.493631	-0.273088	0.495708	1.05464	0.776906	-0.0124959	-0.807143	-1.42361	-1.47484	-0.664303	0.693164	1.72158	1.71929	0.587527	-0.947082	-1.83964	-1.25663	0.354894	1.66333	1.48261
-0.521537	-0.527305	-0.502443	-0.452177	-0.385983	-0.31279	-0.239368	-0.16977	-0.103829	-0.0366246	0.0408141	0.1419	0.282266	0.471823	0.704391	0.950704	1.15628	1.24408	1.14058	0.817355	0.288237	-0.382721	-1.03571	-1.48381	-1.58129	-1.35124	-0.875523	-0.24215	0.454485	1.09785	1.54531	1.68095	1.51571	1.11928	0.582914	-0.00531107	-0.564834	-1.01694	-1.29567	-1.39007	-1.34925	-1.23511	-1.10607	-0.997403	-0.905302	-0.813733	-0.703995	-0.555791	-0.349293	-0.0743097
-0.0477943	-0.0620419	-0.0677294	-0.0647792	-0.0544048	-0.0387681	-0.0208221	-0.00417519	0.0074317	0.010371	0.00158499	-0.0210837	-0.0582957	-0.108042	-0.165503	-0.224363	-0.277873	-0.319587	-0.344632	-0.350762	-0.336791	-0.301652	-0.244279	-0.163625	-0.0591344	0.0664282	0.204101	0.34336	0.473643	0.584365	0.664872	0.704553	0.696099	0.643093	0.552162	0.430027	0.283394	0.118956	-0.0565416	-0.236138	-0.412485	-0.578144	-0.72599	-0.850301	-0.94862	-1.02258	-1.07624	-1.11434	-1.14121	-1.15972
1.98183	1.99793	2.01176	2.02361	2.03398	2.04344	2.05255	2.06186	2.07185	2.08285	2.09495	2.10801	2.12172	2.13568	2.14951	2.16276	2.17499	2.18576	2.1946	2.20106	2.20468	2.20498	2.20149	2.19375	2.1813	2.16373	2.14064	2.11163	2.07634	2.03439	1.98546	1.92936	1.86603	1.7957	1.71886	1.63614	1.54821	1.45574	1.35939	1.25983	1.15772	1.05374	0.948555	0.842836	0.737248	0.632431	0.52901	0.427594	0.328777	0.233124
7.42817	7.4157	7.40173	7.38635	7.36969	7.35191	7.33316	7.31359	7.29333	7.27249	7.25109	7.2291	7.20642	7.18295	7.15858	7.13319	7.10666	7.07888	7.04971	7.01902	6.98669	6.95257	6.91653	6.87846	6.83822	6.7957	6.7508	6.70342	6.65347	6.60085	6.5455	6.48738	6.4265	6.36296	6.29692	6.22862	6.15829	6.08618	6.01253	5.9376	5.86164	5.78487	5.70756	5.62993	5.55221	5.47461	5.39736	5.32066	5.24474	5.1698
IMF1	IMF2	IMF3	IMF4	IMF5	Residual
-0.100596	-0.0511898	-0.521537	-0.0477943	1.98183	7.42817
-0.0161535	-0.0488786	-0.527305	-0.0620419	1.99793	7.4157
0.0041721	-0.0178625	-0.502443	-0.0677294	2.01176	7.40173
0.00578257	0.00120862	-0.452177	-0.0647792	2.02361	7.38635
0.00880931	-0.00172881	-0.385983	-0.0544048	2.03398	7.36969
0.00610082	-0.00915702	-0.31279	-0.0387681	2.04344	7.35191
9.86541e-05	-0.0145175	-0.239368	-0.0208221	2.05255	7.33316
-5.6786e-05	-0.0199728	-0.16977	-0.00417519	2.06186	7.31359
-0.000579557	-0.0163499	-0.103829	0.0074317	2.07185	7.29333
-0.0027555	-0.00410522	-0.0366246	0.010371	2.08285	7.27249
-0.00281194	0.00695962	0.0408141	0.00158499	2.09495	7.25109
-0.00290175	0.00794036	0.1419	-0.0210837	2.10801	7.2291
-0.00202694	-0.0167421	0.282266	-0.0582957	2.12172	7.20642
0.000516985	-0.0792249	0.471823	-0.108042	2.13568	7.18295
0.0022448	-0.175141	0.704391	-0.165503	2.14951	7.15858
0.0057695	-0.283608	0.950704	-0.224363	2.16276	7.13319
0.0247093	-0.369947	1.15628	-0.277873	2.17499	7.10666
0.0176771	-0.321624	1.24408	-0.319587	2.18576	7.07888
-0.106283	0.0215794	1.14058	-0.344632	2.1946	7.04971
-0.292417	0.631669	0.817355	-0.350762	2.20106	7.01902
-0.0695206	1.02301	0.288237	-0.336791	2.20468	6.98669
1.14432	0.549177	-0.382721	-0.301652	2.20498	6.95257
-1.11465	-0.578383	-1.03571	-0.244279	2.20149	6.91653
0.120815	-1.10196	-1.48381	-0.163625	2.19375	6.87846
-0.0479731	-0.717703	-1.58129	-0.0591344	2.1813	6.83822
0.457938	-0.042476	-1.35124	0.0664282	2.16373	6.7957
-0.413602	0.51216	-0.875523	0.204101	2.14064	6.7508
0.0908176	0.770068	-0.24215	0.34336	2.11163	6.70342
0.412838	0.577963	0.454485	0.473643	2.07634	6.65347
-0.499444	-0.0129221	1.09785	0.584365	2.03439	6.60085
0.629207	-0.493631	1.54531	0.664872	1.98546	6.5455
-0.818224	-0.273088	1.68095	0.704553	1.92936	6.48738
-0.0541194	0.495708	1.51571	0.696099	1.86603	6.4265
0.962188	1.05464	1.11928	0.643093	1.7957	6.36296
-0.896298	0.776906	0.582914	0.552162	1.71886	6.29692
0.708788	-0.0124959	-0.00531107	0.430027	1.63614	6.22862
-0.540483	-0.807143	-0.564834	0.283394	1.54821	6.15829
0.550829	-1.42361	-1.01694	0.118956	1.45574	6.08618
-0.369507	-1.47484	-1.29567	-0.0565416	1.35939	6.01253
-0.5139	-0.664303	-1.39007	-0.236138	1.25983	5.9376
0.579304	0.693164	-1.34925	-0.412485	1.15772	5.86164
0.398302	1.72158	-1.23511	-0.578144	1.05374	5.78487
-0.523497	1.71929	-1.10607	-0.72599	0.948555	5.70756
0.945026	0.587527	-0.997403	-0.850301	0.842836	5.62993
0.487065	-0.947082	-0.905302	-0.94862	0.737248	5.55221
-1.31482	-1.83964	-0.813733	-1.02258	0.632431	5.47461
-0.921804	-1.25663	-0.703995	-1.07624	0.52901	5.39736
1.24813	0.354894	-0.555791	-1.11434	0.427594	5.32066
-0.203602	1.66333	-0.349293	-1.14121	0.328777	5.24474
0.887941	1.48261	-0.0743097	-1.15972	0.233124	5.1698
0.337266	0.169798	0.243712	-1.17138	0.141164	5.09604
-1.01186	-1.1061	0.563546	-1.1769	0.0533674	5.02364
0.324544	-1.39788	0.844271	-1.17635	-0.0298787	4.95274
-0.0125729	-0.890052	1.05647	-1.16948	-0.108272	4.88347
0.136448	-0.127033	1.17805	-1.15564	-0.181589	4.81594
-0.450486	0.617963	1.18223	-1.13388	-0.249668	4.75021
0.421266	1.00725	1.04031	-1.10355	-0.312401	4.68636
0.133692	0.774435	0.7368	-1.06498	-0.369716	4.62443
-0.45286	0.231592	0.303936	-1.01925	-0.421552	4.56446
0.0863841	-0.148827	-0.198279	-0.967749	-0.467853	4.50649
0.190121	-0.319527	-0.697318	-0.911909	-0.508563	4.45055
0.18732	-0.428808	-1.11311	-0.853184	-0.54363	4.39669
-0.555753	-0.376103	-1.37138	-0.793089	-0.573016	4.34493
0.472863	-0.136366	-1.40787	-0.733518	-0.596689	4.2953
-0.156284	-0.0539288	-1.189	-0.67669	-0.614633	4.24785
-0.0860644	-0.230851	-0.732041	-0.623689	-0.626861	4.2026
0.269004	-0.494631	-0.109305	-0.575189	-0.633425	4.15956
0.0947465	-0.543378	0.571668	-0.531774	-0.634421	4.11875
-0.874852	-0.0767441	1.18636	-0.493968	-0.629991	4.08014
1.02971	0.632522	1.60321	-0.462226	-0.620325	4.0437
-0.452992	0.796691	1.69635	-0.436726	-0.605669	4.00939
-0.406794	0.316768	1.40161	-0.416065	-0.586329	3.97714
0.768526	-0.453677	0.807899	-0.395736	-0.562651	3.94686
-0.715817	-0.922949	0.0445544	-0.370481	-0.535009	3.91848
-0.0755952	-0.606422	-0.753939	-0.33504	-0.503779	3.89189
0.0597852	0.318926	-1.4353	-0.284178	-0.469317	3.86702
0.1247	1.01214	-1.83257	-0.212671	-0.431974	3.8438
0.576109	0.747534	-1.81716	-0.11632	-0.392118	3.82213
-0.228791	-0.288124	-1.42207	0.0043628	-0.350134	3.80194
-0.510783	-1.18673	-0.764611	0.145577	-0.306442	3.78311
0.121237	-1.22241	0.0265068	0.302998	-0.2615	3.76553
-0.345314	-0.350792	0.825546	0.472344	-0.215798	3.74908
-0.633347	0.872235	1.48674	0.649349	-0.169841	3.73362
0.992035	1.6092	1.85883	0.829749	-0.124137	3.71903
1.04382	1.2613	1.82699	1.00905	-0.0791946	3.70518
-1.10731	0.0453943	1.42878	1.18177	-0.0355223	3.69194
-0.435171	-1.10723	0.770352	1.34194	0.00637673	3.67918
0.645506	-1.60756	-0.0303518	1.48358	0.0460023	3.66676
-0.526028	-1.51335	-0.834239	1.60066	0.082856	3.65454
0.461942	-1.37385	-1.47567	1.68719	0.116444	3.64239
-0.384445	-1.5319	-1.81666	1.73715	0.146288	3.63017
0.616869	-1.82867	-1.815	1.74563	0.171995	3.61776
-0.343454	-1.73952	-1.50291	1.71291	0.193407	3.60512
-1.20639	-0.885855	-0.956075	1.64267	0.210679	3.59231
-0.358794	0.703431	-0.279153	1.53904	0.224081	3.57941
1.7536	2.36571	0.413983	1.40616	0.233892	3.5665
[truncated: 46 more columns]

## Sheet: CGD
-0.0311816	-0.0136968	-0.00264649	0.0205132	-0.0017208	-0.00276074	0.000345147	-0.00466732	0.0020716	0.000879908	-0.000568839	0.00379044	-0.0003059	5.80974e-05	0.000394833	-0.00328711	0.000965933	0.00119979	0.000140793	0.000341881	-0.00100417	-0.00214481	-0.00116382	0.00685222	-0.00154824	-0.00226381	-0.000659013	-0.000567354	0.00169239	0.00268536	0.0010435	-0.00836746	0.00154898	0.00250837	0.000365229	-0.00103901	0.00024636	0.00321741	0.00251332	-0.010572	0.00262496	0.0026018	0.000265154	0.00422424	-0.00156205	-0.00172825	-0.000425174	0.00081934	0.000188431	-0.000110789
-0.00601781	-0.00850502	0.00650987	0.0209677	0.0186418	0.00296809	-0.0122349	-0.0179385	-0.0126945	-0.00146939	0.00850316	0.0123092	0.00919332	0.00259665	-0.00360384	-0.00656337	-0.00575166	-0.00317656	-0.00112242	-0.000946063	-0.00162824	0.00029639	0.0045188	0.00728049	0.0059424	0.00201002	-0.000827796	-0.00100298	-0.000576969	-0.0022884	-0.00641498	-0.00874871	-0.00492427	0.00271333	0.00945594	0.0122921	0.00921645	0.000179446	-0.0110745	-0.0172821	-0.0129929	-0.00162784	0.00844085	0.0115427	0.00775992	0.00154012	-0.00267556	-0.00392489	-0.00312647	-0.00172699
0.0591014	0.0687186	0.0718148	0.068051	0.0582754	0.0446564	0.0299204	0.0167865	0.00714643	0.00142145	-0.00129337	-0.002579	-0.00385315	-0.00566136	-0.00750174	-0.00819881	-0.00658305	-0.00206133	0.00510562	0.0138941	0.0227942	0.030165	0.034474	0.0345533	0.0299832	0.0211755	0.00934429	-0.00379284	-0.0164297	-0.027003	-0.0344764	-0.0385302	-0.0397295	-0.0394106	-0.0391289	-0.0400016	-0.0420989	-0.0443152	-0.0448104	-0.0417614	-0.0344199	-0.023654	-0.0114267	-0.000121328	0.00828109	0.0128795	0.013752	0.0117256	0.00791361	0.00328539
0.342322	0.348039	0.350078	0.348293	0.3429	0.334307	0.322976	0.309381	0.293997	0.277282	0.259657	0.241511	0.223167	0.204842	0.186607	0.168392	0.150042	0.131351	0.1121	0.0920769	0.0710902	0.048978	0.0256273	0.00101256	-0.0247446	-0.051355	-0.0783987	-0.10537	-0.131728	-0.156918	-0.180376	-0.20154	-0.219887	-0.234963	-0.246401	-0.253959	-0.257551	-0.257264	-0.253346	-0.246185	-0.236287	-0.22421	-0.210518	-0.195756	-0.180433	-0.164996	-0.149806	-0.135119	-0.121049	-0.107581
1.49969	1.49736	1.49417	1.4901	1.48519	1.47948	1.47301	1.46582	1.45795	1.44945	1.44035	1.43071	1.42056	1.40994	1.3989	1.38748	1.3757	1.36362	1.35126	1.33868	1.3259	1.31296	1.2999	1.28676	1.27358	1.2604	1.24727	1.23421	1.22129	1.20854	1.196	1.18373	1.17177	1.16016	1.14895	1.13818	1.12789	1.11812	1.10888	1.1002	1.09206	1.08446	1.0774	1.07086	1.06483	1.05931	1.05429	1.04977	1.04573	1.04218
IMF1	IMF2	IMF3	IMF4	Residual
-0.0311816	-0.00601781	0.0591014	0.342322	1.49969
-0.0136968	-0.00850502	0.0687186	0.348039	1.49736
-0.00264649	0.00650987	0.0718148	0.350078	1.49417
0.0205132	0.0209677	0.068051	0.348293	1.4901
-0.0017208	0.0186418	0.0582754	0.3429	1.48519
-0.00276074	0.00296809	0.0446564	0.334307	1.47948
0.000345147	-0.0122349	0.0299204	0.322976	1.47301
-0.00466732	-0.0179385	0.0167865	0.309381	1.46582
0.0020716	-0.0126945	0.00714643	0.293997	1.45795
0.000879908	-0.00146939	0.00142145	0.277282	1.44945
-0.000568839	0.00850316	-0.00129337	0.259657	1.44035
0.00379044	0.0123092	-0.002579	0.241511	1.43071
-0.0003059	0.00919332	-0.00385315	0.223167	1.42056
5.80974e-05	0.00259665	-0.00566136	0.204842	1.40994
0.000394833	-0.00360384	-0.00750174	0.186607	1.3989
-0.00328711	-0.00656337	-0.00819881	0.168392	1.38748
0.000965933	-0.00575166	-0.00658305	0.150042	1.3757
0.00119979	-0.00317656	-0.00206133	0.131351	1.36362
0.000140793	-0.00112242	0.00510562	0.1121	1.35126
0.000341881	-0.000946063	0.0138941	0.0920769	1.33868
-0.00100417	-0.00162824	0.0227942	0.0710902	1.3259
-0.00214481	0.00029639	0.030165	0.048978	1.31296
-0.00116382	0.0045188	0.034474	0.0256273	1.2999
0.00685222	0.00728049	0.0345533	0.00101256	1.28676
-0.00154824	0.0059424	0.0299832	-0.0247446	1.27358
-0.00226381	0.00201002	0.0211755	-0.051355	1.2604
-0.000659013	-0.000827796	0.00934429	-0.0783987	1.24727
-0.000567354	-0.00100298	-0.00379284	-0.10537	1.23421
0.00169239	-0.000576969	-0.0164297	-0.131728	1.22129
0.00268536	-0.0022884	-0.027003	-0.156918	1.20854
0.0010435	-0.00641498	-0.0344764	-0.180376	1.196
-0.00836746	-0.00874871	-0.0385302	-0.20154	1.18373
0.00154898	-0.00492427	-0.0397295	-0.219887	1.17177
0.00250837	0.00271333	-0.0394106	-0.234963	1.16016
0.000365229	0.00945594	-0.0391289	-0.246401	1.14895
-0.00103901	0.0122921	-0.0400016	-0.253959	1.13818
0.00024636	0.00921645	-0.0420989	-0.257551	1.12789
0.00321741	0.000179446	-0.0443152	-0.257264	1.11812
0.00251332	-0.0110745	-0.0448104	-0.253346	1.10888
-0.010572	-0.0172821	-0.0417614	-0.246185	1.1002
0.00262496	-0.0129929	-0.0344199	-0.236287	1.09206
0.0026018	-0.00162784	-0.023654	-0.22421	1.08446
0.000265154	0.00844085	-0.0114267	-0.210518	1.0774
0.00422424	0.0115427	-0.000121328	-0.195756	1.07086
-0.00156205	0.00775992	0.00828109	-0.180433	1.06483
-0.00172825	0.00154012	0.0128795	-0.164996	1.05931
-0.000425174	-0.00267556	0.013752	-0.149806	1.05429
0.00081934	-0.00392489	0.0117256	-0.135119	1.04977
0.000188431	-0.00312647	0.00791361	-0.121049	1.04573
-0.000110789	-0.00172699	0.00328539	-0.107581	1.04218
-0.000161801	-0.000450384	-0.00145945	-0.0946036	1.03911
-0.000607204	0.000749001	-0.00589223	-0.081946	1.03652
0.000174201	0.00156244	-0.00985402	-0.0694038	1.03441
0.000580854	0.00158507	-0.0132164	-0.0567683	1.03277
8.60791e-05	0.000997478	-0.015802	-0.0438671	1.0316
-0.00224104	0.000368486	-0.0173357	-0.0306088	1.03089
0.000702815	-0.000131972	-0.0174961	-0.0169926	1.03064
0.00139789	-0.000819837	-0.0159376	-0.0031122	1.03085
0.000476995	-0.00234424	-0.0124497	0.0108439	1.0315
-0.00263844	-0.00375162	-0.00713263	0.0246063	1.03259
-0.000536793	-0.00331384	-0.000483303	0.0378289	1.03413
-0.00101134	-0.000169749	0.00653627	0.0501194	1.03609
-0.000980022	0.00424881	0.0126907	0.0610672	1.03848
0.00501611	0.00602299	0.0168434	0.0702733	1.0413
-0.00134975	0.0033732	0.0183239	0.0773933	1.04453
-0.00202683	-0.000409106	0.017175	0.0821701	1.04818
-0.000541101	-0.00236385	0.0141096	0.0844589	1.05224
0.00185718	-0.00228432	0.0101889	0.0842461	1.05672
0.000207914	-0.00153194	0.00646393	0.0816383	1.06159
-0.000207142	-0.00110678	0.00363314	0.0768509	1.06684
-0.000125446	-0.000820553	0.00197422	0.0701874	1.07244
7.91897e-05	-0.000497342	0.00136359	0.0620097	1.07835
-0.000191864	1.3421e-05	0.00146624	0.052714	1.08451
-0.000150052	0.000383188	0.00188182	0.0427143	1.0909
6.8366e-05	0.000878474	0.00212047	0.0324159	1.09746
0.000564316	0.00150627	0.00173612	0.0222032	1.10415
-5.18183e-05	0.00162496	0.000490043	0.012435	1.11092
0.000345631	0.000715809	-0.00155586	0.00344579	1.11772
0.000478769	-0.000453918	-0.00414382	-0.00446349	1.12451
-0.0014422	-0.000693703	-0.00688192	-0.0110369	1.13124
0.000692958	8.71646e-05	-0.00933139	-0.0160746	1.13786
0.00110379	0.000404509	-0.0111143	-0.0194375	1.14433
0.000265513	-0.000557584	-0.0119161	-0.0210579	1.1506
-0.00298216	-0.00165221	-0.0116702	-0.0209529	1.15664
0.000381454	-0.00128482	-0.0105171	-0.0192196	1.16242
0.000616852	0.000392036	-0.0086989	-0.0160452	1.16791
-0.000241294	0.00179288	-0.00636935	-0.0116995	1.17309
-0.000667376	0.00173035	-0.0034985	-0.00652476	1.17793
-0.000116984	-0.000102249	9.18197e-05	-0.00090979	1.18241
0.000788452	-0.00279823	0.00454845	0.00474039	1.18649
0.000931475	-0.00469123	0.00976097	0.0100149	1.19015
-6.49101e-05	-0.00444503	0.0152023	0.0145101	1.19336
-0.00207723	-0.000873625	0.0199632	0.0178548	1.19609
-0.00267525	0.00499697	0.0229877	0.0197301	1.19831
0.00299119	0.00948103	0.0233766	0.0198987	1.2
0.018268	0.00965249	0.0207962	0.0182951	1.20114
[truncated: 46 more columns]

## Sheet: FSI
0.744801	-0.458797	-0.540022	0.347819	0.258167	0.00784271	-0.145093	-0.0237742	-0.0913081	0.183002	-0.100525	-0.0874748	0.0921874	-0.0366982	0.105236	-0.0519695	0.277174	-0.41118	-0.204667	0.535768	-0.224191	-0.401185	0.412405	0.160266	-0.427685	0.179416	0.133295	0.183007	0.134913	-0.456366	0.444932	-0.138505	-0.244349	0.0580007	0.344708	-0.480797	0.521772	0.00494096	-0.603842	-0.201744	0.607106	-0.378106	-0.14439	0.155345	0.356971	-0.441075	0.265314	0.117803	-0.0809331	0.0860949
1.00787	0.80227	0.569006	0.37193	0.112046	-0.295421	-0.697756	-0.883052	-0.825582	-0.671745	-0.506007	-0.231402	0.166179	0.521151	0.64014	0.424863	-0.0366468	-0.411838	-0.425488	-0.156751	0.142491	0.268415	0.171052	-0.0431066	-0.168681	-0.044825	0.135065	0.0867437	-0.142256	-0.220296	0.0242645	0.295962	0.422225	0.380178	0.133605	-0.263475	-0.641361	-0.767536	-0.502997	0.119407	0.696874	0.821639	0.544862	0.0898951	-0.397033	-0.605459	-0.302671	0.123896	0.276878	0.110503
0.135225	0.141927	0.121592	0.078439	0.0201585	-0.0419063	-0.0936651	-0.121039	-0.114678	-0.0751224	-0.0138108	0.0466848	0.08616	0.0952952	0.0706597	0.0188103	-0.0417596	-0.0899723	-0.107178	-0.0868418	-0.0375805	0.0262836	0.0887791	0.136702	0.160056	0.152633	0.118449	0.0664524	0.00339691	-0.0678919	-0.143748	-0.215079	-0.270639	-0.297607	-0.284649	-0.227314	-0.127191	0.010643	0.172041	0.320335	0.413281	0.409668	0.28735	0.0833118	-0.151205	-0.365005	-0.509517	-0.548051	-0.452682	-0.223998
1.13657	1.08654	1.0182	0.933766	0.836218	0.72859	0.613903	0.495132	0.37514	0.256379	0.140774	0.029961	-0.0746963	-0.172281	-0.262498	-0.345735	-0.422778	-0.494539	-0.561886	-0.625359	-0.684814	-0.739672	-0.789109	-0.832205	-0.86799	-0.89523	-0.912304	-0.917311	-0.9082	-0.882851	-0.839127	-0.774942	-0.688523	-0.579298	-0.449323	-0.303444	-0.147579	0.0122027	0.169858	0.319351	0.454651	0.569772	0.659253	0.719085	0.74602	0.736943	0.688911	0.59949	0.469114	0.307452
1.47893	1.39737	1.31361	1.22793	1.1406	1.0519	0.962094	0.871462	0.780272	0.688797	0.59731	0.506083	0.415389	0.3255	0.23669	0.14923	0.0633949	-0.0205427	-0.102309	-0.18163	-0.258232	-0.331842	-0.402184	-0.468986	-0.531973	-0.590873	-0.645412	-0.695323	-0.740365	-0.780367	-0.815252	-0.845008	-0.869655	-0.889219	-0.903728	-0.913208	-0.917683	-0.917177	-0.911713	-0.901309	-0.885975	-0.865719	-0.840548	-0.810471	-0.775494	-0.735651	-0.691146	-0.642551	-0.590558	-0.535873
0.547909	0.536245	0.524364	0.512286	0.500027	0.487604	0.475035	0.462338	0.44953	0.436629	0.423652	0.410617	0.397541	0.384441	0.371335	0.358239	0.345171	0.332147	0.319183	0.306295	0.2935	0.280813	0.268251	0.25583	0.243565	0.231473	0.219569	0.207872	0.196396	0.185157	0.174172	0.163455	0.153023	0.14289	0.133073	0.123587	0.114447	0.105666	0.0972548	0.0892214	0.0815654	0.0742839	0.0673737	0.0608313	0.0546536	0.0488369	0.0433764	0.0382648	0.0334936	0.0290543
IMF1	IMF2	IMF3	IMF4	IMF5	Residual
0.744801	1.00787	0.135225	1.13657	1.47893	0.547909
-0.458797	0.80227	0.141927	1.08654	1.39737	0.536245
-0.540022	0.569006	0.121592	1.0182	1.31361	0.524364
0.347819	0.37193	0.078439	0.933766	1.22793	0.512286
0.258167	0.112046	0.0201585	0.836218	1.1406	0.500027
0.00784271	-0.295421	-0.0419063	0.72859	1.0519	0.487604
-0.145093	-0.697756	-0.0936651	0.613903	0.962094	0.475035
-0.0237742	-0.883052	-0.121039	0.495132	0.871462	0.462338
-0.0913081	-0.825582	-0.114678	0.37514	0.780272	0.44953
0.183002	-0.671745	-0.0751224	0.256379	0.688797	0.436629
-0.100525	-0.506007	-0.0138108	0.140774	0.59731	0.423652
-0.0874748	-0.231402	0.0466848	0.029961	0.506083	0.410617
0.0921874	0.166179	0.08616	-0.0746963	0.415389	0.397541
-0.0366982	0.521151	0.0952952	-0.172281	0.3255	0.384441
0.105236	0.64014	0.0706597	-0.262498	0.23669	0.371335
-0.0519695	0.424863	0.0188103	-0.345735	0.14923	0.358239
0.277174	-0.0366468	-0.0417596	-0.422778	0.0633949	0.345171
-0.41118	-0.411838	-0.0899723	-0.494539	-0.0205427	0.332147
-0.204667	-0.425488	-0.107178	-0.561886	-0.102309	0.319183
0.535768	-0.156751	-0.0868418	-0.625359	-0.18163	0.306295
-0.224191	0.142491	-0.0375805	-0.684814	-0.258232	0.2935
-0.401185	0.268415	0.0262836	-0.739672	-0.331842	0.280813
0.412405	0.171052	0.0887791	-0.789109	-0.402184	0.268251
0.160266	-0.0431066	0.136702	-0.832205	-0.468986	0.25583
-0.427685	-0.168681	0.160056	-0.86799	-0.531973	0.243565
0.179416	-0.044825	0.152633	-0.89523	-0.590873	0.231473
0.133295	0.135065	0.118449	-0.912304	-0.645412	0.219569
0.183007	0.0867437	0.0664524	-0.917311	-0.695323	0.207872
0.134913	-0.142256	0.00339691	-0.9082	-0.740365	0.196396
-0.456366	-0.220296	-0.0678919	-0.882851	-0.780367	0.185157
0.444932	0.0242645	-0.143748	-0.839127	-0.815252	0.174172
-0.138505	0.295962	-0.215079	-0.774942	-0.845008	0.163455
-0.244349	0.422225	-0.270639	-0.688523	-0.869655	0.153023
0.0580007	0.380178	-0.297607	-0.579298	-0.889219	0.14289
0.344708	0.133605	-0.284649	-0.449323	-0.903728	0.133073
-0.480797	-0.263475	-0.227314	-0.303444	-0.913208	0.123587
0.521772	-0.641361	-0.127191	-0.147579	-0.917683	0.114447
0.00494096	-0.767536	0.010643	0.0122027	-0.917177	0.105666
-0.603842	-0.502997	0.172041	0.169858	-0.911713	0.0972548
-0.201744	0.119407	0.320335	0.319351	-0.901309	0.0892214
0.607106	0.696874	0.413281	0.454651	-0.885975	0.0815654
-0.378106	0.821639	0.409668	0.569772	-0.865719	0.0742839
-0.14439	0.544862	0.28735	0.659253	-0.840548	0.0673737
0.155345	0.0898951	0.0833118	0.719085	-0.810471	0.0608313
0.356971	-0.397033	-0.151205	0.74602	-0.775494	0.0546536
-0.441075	-0.605459	-0.365005	0.736943	-0.735651	0.0488369
0.265314	-0.302671	-0.509517	0.688911	-0.691146	0.0433764
0.117803	0.123896	-0.548051	0.59949	-0.642551	0.0382648
-0.0809331	0.276878	-0.452682	0.469114	-0.590558	0.0334936
0.0860949	0.110503	-0.223998	0.307452	-0.535873	0.0290543
0.050326	-0.114073	0.0783357	0.127438	-0.479199	0.024938
-0.395449	-0.119114	0.376485	-0.0577267	-0.421239	0.021136
0.483361	0.0692704	0.60285	-0.234842	-0.362697	0.0176394
-0.46553	0.163033	0.699336	-0.391306	-0.304277	0.0144395
0.36101	0.115869	0.630947	-0.518074	-0.246684	0.0115277
-0.00155453	-0.0432681	0.418325	-0.611369	-0.190619	0.00889509
-0.0265673	-0.212006	0.105713	-0.668646	-0.136784	0.00653307
-0.177606	-0.133028	-0.254615	-0.687417	-0.085837	0.00443326
0.178145	0.21212	-0.588223	-0.665385	-0.0382479	0.00258851
-0.101828	0.420807	-0.807068	-0.600573	0.00583153	0.00099364
0.112334	0.193041	-0.846955	-0.492491	0.0463283	-0.000356028
0.637357	-0.35673	-0.711421	-0.347267	0.083171	-0.00146512
0.353658	-0.679739	-0.426185	-0.176511	0.116288	-0.00233819
-1.36817	-0.305854	-0.0345787	0.00714481	0.145608	-0.00297947
1.47232	0.504649	0.372463	0.191069	0.171058	-0.00339254
-1.03248	0.716353	0.692535	0.362631	0.192565	-0.00358047
-1.13549	0.383118	0.84559	0.509197	0.210055	-0.00354589
0.684057	-0.0792836	0.841434	0.618592	0.223456	-0.00329114
0.411676	-0.316394	0.719664	0.682859	0.232693	-0.00281823
-0.132897	-0.388586	0.515821	0.704136	0.237702	-0.002129
-0.0692549	-0.393016	0.267195	0.687241	0.238528	-0.00122466
0.0430676	-0.304639	0.00839654	0.636788	0.235519	-0.000104654
0.0120144	-0.149692	-0.231229	0.557305	0.229108	0.001232
-0.0606643	0.0236277	-0.426726	0.453315	0.219732	0.00278621
-0.0080557	0.143487	-0.555801	0.329355	0.207831	0.0045586
0.157038	0.106765	-0.60149	0.189968	0.193842	0.00654955
-0.131111	-0.0685401	-0.561662	0.0397643	0.178203	0.00875933
-0.017818	-0.192869	-0.444275	-0.116081	0.161353	0.0111883
-0.0742507	-0.137136	-0.267687	-0.270769	0.143731	0.0138367
0.0810179	0.0372099	-0.0658361	-0.41597	0.125774	0.0167049
0.014109	0.169585	0.120573	-0.542609	0.107921	0.0197932
0.0210977	0.163856	0.252662	-0.641753	0.0906105	0.0231018
0.0716756	0.0457826	0.305518	-0.70601	0.0742811	0.0266311
-0.0302823	-0.0452903	0.276891	-0.732337	0.0593702	0.0303811
-0.322286	-0.0162607	0.185125	-0.72364	0.0462427	0.034352
0.40312	0.012474	0.0654105	-0.684927	0.034954	0.0385417
-0.243906	-0.123094	-0.0451852	-0.621441	0.0253702	0.0429479
-0.0569581	-0.237038	-0.120663	-0.538664	0.0173253	0.0475687
-0.0234823	-0.16494	-0.145135	-0.442835	0.0106519	0.0524033
0.0351322	0.000142143	-0.122838	-0.340676	0.00518165	0.0574519
0.134975	0.0759132	-0.0683629	-0.2383	0.000745501	0.0627153
0.0123551	0.0387849	-0.000435168	-0.141528	-0.00282643	0.0681951
-0.272907	0.0457486	0.0593307	-0.0561875	-0.0057045	0.0738937
0.296926	0.16936	0.0924644	0.0118995	-0.00805927	0.0798132
-0.10997	0.249848	0.0891371	0.0571778	-0.0100611	0.0859558
0.0785956	0.158269	0.0475553	0.0762064	-0.0118818	0.0923237
[truncated: 46 more columns]

## Sheet: OGAP
0.00114745	0.000204751	-0.000124483	-9.48444e-05	4.64006e-06	5.09981e-05	3.46115e-05	3.38698e-05	4.13706e-05	-6.51962e-06	-3.31844e-05	1.72223e-05	9.8158e-05	7.00825e-05	-9.90453e-05	-0.00016654	0.000269665	0.00101642	0.000294917	-0.00498818	-0.0167266	0.000445075	0.0265613	0.0260656	-0.0338482	-0.00509352	0.0279604	0.0292149	-0.0321168	-0.00357252	0.0258661	0.0312742	-0.0342185	-0.00356604	0.0261103	0.0344779	-0.0346844	-0.00432236	0.0203935	0.0313186	-0.0345318	0.00293599	0.0404783	0.03965	-0.0461519	-0.0144662	0.0272262	0.0380616	-0.0366657	-0.0125951
-0.000213524	-0.000124005	-0.000317946	-0.000573977	-0.000674945	-0.000575102	-0.000327525	-5.30639e-05	0.000247108	0.000649392	0.00111365	0.00162295	0.00221497	0.00290935	0.00346968	0.00326717	0.00149793	-0.00200689	-0.00580152	-0.00709417	-0.00410139	0.00171901	0.00707527	0.00901038	0.00705596	0.00294055	-0.00162223	-0.00523304	-0.0074167	-0.00856626	-0.00901377	-0.00902919	-0.0090361	-0.00937962	-0.0097382	-0.00955356	-0.0078663	-0.00334584	0.00302744	0.0094427	0.0136595	0.0127986	0.0073194	-0.00108654	-0.00871022	-0.0115822	-0.0102646	-0.00621049	-0.00132448	0.00161074
0.0174928	0.0175333	0.0172152	0.016558	0.015614	0.0144348	0.0130522	0.0114727	0.00966468	0.00757126	0.00510901	0.00219027	-0.00122554	-0.00506729	-0.00911303	-0.0130192	-0.0164201	-0.0189816	-0.0203868	-0.0203355	-0.0187006	-0.0158759	-0.0123899	-0.00877018	-0.00546547	-0.00263313	-0.000279664	0.00163015	0.00318127	0.00454063	0.00590463	0.00743078	0.00922964	0.0112905	0.0134554	0.0154992	0.0171598	0.0181738	0.0182825	0.0172228	0.0147292	0.0106758	0.0054913	-0.000163372	-0.00560201	-0.0101427	-0.0132125	-0.0146614	-0.0146404	-0.0133525
-0.00181328	-0.00179856	-0.00176506	-0.00171339	-0.0016448	-0.00156064	-0.00146232	-0.0013513	-0.00122905	-0.00109685	-0.000955906	-0.000807443	-0.000652752	-0.000493176	-0.000330072	-0.000164797	1.28925e-06	0.000166827	0.000330441	0.000490662	0.000645939	0.00079479	0.00093576	0.00106739	0.00118822	0.00129679	0.00139164	0.00147126	0.00153416	0.00157882	0.00160374	0.00160749	0.00158862	0.00154574	0.00147742	0.00138223	0.00125872	0.00110547	0.000921634	0.00070944	0.000475238	0.000226763	-2.81212e-05	-0.000281552	-0.000525665	-0.000752597	-0.000954485	-0.00112347	-0.0012523	-0.00133741
-0.00467094	-0.00462227	-0.00457126	-0.00451803	-0.00446271	-0.00440544	-0.00434634	-0.00428556	-0.00422324	-0.00415951	-0.00409452	-0.00402841	-0.00396132	-0.00389339	-0.00382476	-0.00375557	-0.00368595	-0.00361604	-0.00354597	-0.00347588	-0.00340592	-0.00333621	-0.0032669	-0.00319813	-0.00313003	-0.00306273	-0.00299638	-0.00293109	-0.00286701	-0.00280424	-0.00274294	-0.00268319	-0.00262506	-0.00256857	-0.00251368	-0.00246034	-0.0024085	-0.00235813	-0.00230916	-0.00226156	-0.00221527	-0.00217027	-0.00212648	-0.00208388	-0.00204242	-0.00200204	-0.00196271	-0.00192437	-0.00188698	-0.00185049
IMF1	IMF2	IMF3	IMF4	Residual
0.00114745	-0.000213524	0.0174928	-0.00181328	-0.00467094
0.000204751	-0.000124005	0.0175333	-0.00179856	-0.00462227
-0.000124483	-0.000317946	0.0172152	-0.00176506	-0.00457126
-9.48444e-05	-0.000573977	0.016558	-0.00171339	-0.00451803
4.64006e-06	-0.000674945	0.015614	-0.0016448	-0.00446271
5.09981e-05	-0.000575102	0.0144348	-0.00156064	-0.00440544
3.46115e-05	-0.000327525	0.0130522	-0.00146232	-0.00434634
3.38698e-05	-5.30639e-05	0.0114727	-0.0013513	-0.00428556
4.13706e-05	0.000247108	0.00966468	-0.00122905	-0.00422324
-6.51962e-06	0.000649392	0.00757126	-0.00109685	-0.00415951
-3.31844e-05	0.00111365	0.00510901	-0.000955906	-0.00409452
1.72223e-05	0.00162295	0.00219027	-0.000807443	-0.00402841
9.8158e-05	0.00221497	-0.00122554	-0.000652752	-0.00396132
7.00825e-05	0.00290935	-0.00506729	-0.000493176	-0.00389339
-9.90453e-05	0.00346968	-0.00911303	-0.000330072	-0.00382476
-0.00016654	0.00326717	-0.0130192	-0.000164797	-0.00375557
0.000269665	0.00149793	-0.0164201	1.28925e-06	-0.00368595
0.00101642	-0.00200689	-0.0189816	0.000166827	-0.00361604
0.000294917	-0.00580152	-0.0203868	0.000330441	-0.00354597
-0.00498818	-0.00709417	-0.0203355	0.000490662	-0.00347588
-0.0167266	-0.00410139	-0.0187006	0.000645939	-0.00340592
0.000445075	0.00171901	-0.0158759	0.00079479	-0.00333621
0.0265613	0.00707527	-0.0123899	0.00093576	-0.0032669
0.0260656	0.00901038	-0.00877018	0.00106739	-0.00319813
-0.0338482	0.00705596	-0.00546547	0.00118822	-0.00313003
-0.00509352	0.00294055	-0.00263313	0.00129679	-0.00306273
0.0279604	-0.00162223	-0.000279664	0.00139164	-0.00299638
0.0292149	-0.00523304	0.00163015	0.00147126	-0.00293109
-0.0321168	-0.0074167	0.00318127	0.00153416	-0.00286701
-0.00357252	-0.00856626	0.00454063	0.00157882	-0.00280424
0.0258661	-0.00901377	0.00590463	0.00160374	-0.00274294
0.0312742	-0.00902919	0.00743078	0.00160749	-0.00268319
-0.0342185	-0.0090361	0.00922964	0.00158862	-0.00262506
-0.00356604	-0.00937962	0.0112905	0.00154574	-0.00256857
0.0261103	-0.0097382	0.0134554	0.00147742	-0.00251368
0.0344779	-0.00955356	0.0154992	0.00138223	-0.00246034
-0.0346844	-0.0078663	0.0171598	0.00125872	-0.0024085
-0.00432236	-0.00334584	0.0181738	0.00110547	-0.00235813
0.0203935	0.00302744	0.0182825	0.000921634	-0.00230916
0.0313186	0.0094427	0.0172228	0.00070944	-0.00226156
-0.0345318	0.0136595	0.0147292	0.000475238	-0.00221527
0.00293599	0.0127986	0.0106758	0.000226763	-0.00217027
0.0404783	0.0073194	0.0054913	-2.81212e-05	-0.00212648
0.03965	-0.00108654	-0.000163372	-0.000281552	-0.00208388
-0.0461519	-0.00871022	-0.00560201	-0.000525665	-0.00204242
-0.0144662	-0.0115822	-0.0101427	-0.000752597	-0.00200204
0.0272262	-0.0102646	-0.0132125	-0.000954485	-0.00196271
0.0380616	-0.00621049	-0.0146614	-0.00112347	-0.00192437
-0.0366657	-0.00132448	-0.0146404	-0.0012523	-0.00188698
-0.0125951	0.00161074	-0.0133525	-0.00133741	-0.00185049
0.0193705	0.00239333	-0.0110123	-0.00138048	-0.00181487
0.0356906	0.00158025	-0.00790254	-0.00138466	-0.00178007
-0.0360667	0.000213787	-0.00443617	-0.00135316	-0.00174608
-0.0127025	0.000166859	-0.00108724	-0.00128914	-0.00171293
0.00783308	0.00134744	0.00183182	-0.00119578	-0.00168065
0.0347662	0.00240027	0.00421807	-0.00107621	-0.0016493
-0.0340965	0.00265936	0.0060274	-0.000933646	-0.0016189
-0.0116906	0.00242109	0.00725204	-0.000771922	-0.00158953
0.00738637	0.00189421	0.00796928	-0.000596763	-0.00156122
0.0346348	0.000521379	0.00831496	-0.000415912	-0.00153403
-0.0356147	-0.00116724	0.00843417	-0.00023824	-0.00150801
-0.00902285	-0.00130822	0.00843797	-7.30678e-05	-0.0014832
0.00871736	1.20926e-05	0.0083236	7.29678e-05	-0.00145965
0.0397198	0.000553809	0.00802598	0.000198691	-0.00143742
-0.0415358	9.00003e-05	0.00742702	0.000305552	-0.00141656
-0.0107294	-6.35263e-06	0.00637869	0.00039578	-0.00139713
0.0135954	0.0003781	0.0048167	0.00047233	-0.00137923
0.0451394	0.000496324	0.00283124	0.000538291	-0.00136296
-0.0448748	8.00869e-05	0.00063638	0.000596724	-0.00134846
-0.0192941	-0.000363746	-0.00149082	0.000650694	-0.00133585
0.0122795	-0.000632109	-0.00328291	0.000703222	-0.00132527
0.0436906	-0.000561734	-0.00455742	0.000756841	-0.00131685
-0.0426411	-5.54708e-05	-0.00526989	0.000812362	-0.00131074
-0.0176642	0.000390739	-0.00549841	0.000868405	-0.00130706
0.0102359	0.000577454	-0.00537542	0.000922946	-0.00130593
0.0421203	0.000408541	-0.00501464	0.000974574	-0.00130743
-0.041363	-9.42953e-05	-0.00446092	0.00102166	-0.00131165
-0.0124831	-0.000361433	-0.0037115	0.00106232	-0.00131863
0.0157347	-0.000309742	-0.00273436	0.00109464	-0.00132844
0.0394495	-0.000168528	-0.0015141	0.00111679	-0.00134109
-0.0392146	-3.21936e-05	-8.26633e-05	0.00112723	-0.00135662
-0.0108428	7.64037e-06	0.00146347	0.00112477	-0.00137502
0.0163865	5.64322e-05	0.00297192	0.00110835	-0.00139626
0.0424654	0.000313363	0.00424963	0.00107692	-0.00142033
-0.0443842	0.00082754	0.00509872	0.00102944	-0.00144717
-0.0151992	0.00111818	0.00536939	0.000965476	-0.0014767
0.0201302	0.00103537	0.00500965	0.000886866	-0.00150887
0.0503276	0.000450595	0.00408951	0.000797674	-0.00154357
-0.0390224	-0.000584199	0.00275703	0.000702552	-0.00158071
-0.0484937	-0.000995118	0.00114835	0.000606205	-0.00162019
0.00717234	-6.74866e-05	-0.000612847	0.000513345	-0.00166192
0.0439027	0.00105143	-0.00237522	0.00042868	-0.00170579
-0.0414351	0.000916652	-0.00394944	0.000356922	-0.0017517
-0.00416793	-0.000720378	-0.00513443	0.00030279	-0.00179958
0.0272601	-0.00211234	-0.00571993	0.000271	-0.00184932
0.0252052	-0.00162232	-0.00555522	0.000265245	-0.00190091
[truncated: 46 more columns]
