# Supplementary material for: Macroeconomic Imbalances and Financial Stress Among BRICS: Analysis of Frequency-Dependent and Asymmetric Causal Nexuses
Source: publisher site journal article supplement (doi:10.1515/snde-2024-0045), 2025-04-16
Supplement: Supplementary file 7 [file SA.xlsx]

## Sheet: CA
0.514154	0.0771139	-1.16024	-1.63914	1.58778	-1.03593	0.577884	-0.848119	0.320492	0.76053	-0.910612	0.73329	-0.476496	0.808944	-0.836234	-0.021056	0.791324	-0.408479	-0.14137	0.268497	0.0979387	-0.48353	0.514862	-0.422755	0.346154	-0.0252377	-0.197935	-0.146596	0.250322	0.155594	-0.27148	0.350807	-1.0021	0.931906	0.872284	-1.27173	0.852683	0.560673	-0.299178	-0.373945	0.306618	-0.161934	-0.0502002	0.344689	-0.710607	0.416696	0.70104	-0.367994	-0.627694	0.17408
0.0826891	-0.208763	-0.677933	-0.322973	0.597297	0.539461	-0.285518	-0.421725	-0.111027	-0.0229016	-0.166872	0.0814069	0.385373	0.0415709	-0.388634	-0.251184	0.160458	0.349954	0.234793	-0.0355063	-0.263661	-0.216782	0.110808	0.306486	0.161714	-0.178441	-0.362841	-0.147633	0.234874	0.319069	0.0254887	-0.266461	-0.142518	0.124399	0.138302	-0.00677221	0.0234253	0.108319	0.0556864	-0.0658722	-0.179111	-0.318773	-0.408801	-0.283976	0.135491	0.56772	0.54442	-0.0352498	-0.560227	-0.465621
-0.311359	-0.371501	-0.364728	-0.28416	-0.193641	-0.162691	-0.201806	-0.26914	-0.299923	-0.235363	-0.0821575	0.0804756	0.203592	0.27018	0.31973	0.394247	0.48326	0.554372	0.578139	0.541872	0.442283	0.285329	0.0974501	-0.0768072	-0.197673	-0.239033	-0.184811	-0.0380422	0.159118	0.34893	0.48159	0.533364	0.493359	0.363381	0.156628	-0.113914	-0.433113	-0.76675	-1.06608	-1.2819	-1.36979	-1.30052	-1.07618	-0.735742	-0.336798	0.063607	0.417533	0.706943	0.939248	1.12518
-0.714682	-0.76678	-0.810029	-0.83831	-0.842753	-0.815501	-0.753969	-0.658502	-0.530142	-0.370998	-0.187968	0.0089708	0.209102	0.401353	0.574857	0.719787	0.828774	0.896469	0.91996	0.899965	0.840337	0.746232	0.622852	0.475305	0.308614	0.127815	-0.0613892	-0.251979	-0.436032	-0.605171	-0.751419	-0.868503	-0.952546	-1.00262	-1.01957	-1.00465	-0.958847	-0.882701	-0.776262	-0.639604	-0.474099	-0.284455	-0.0779976	0.137049	0.352307	0.55939	0.749898	0.915406	1.04742	1.13742
0.0715252	0.114285	0.151282	0.182038	0.206155	0.22345	0.234114	0.238616	0.237456	0.231088	0.219954	0.204497	0.185169	0.162426	0.136726	0.108552	0.0784855	0.0472122	0.0154032	-0.0164182	-0.0478396	-0.0784737	-0.107935	-0.135835	-0.161786	-0.1854	-0.206288	-0.224063	-0.238337	-0.248725	-0.25484	-0.256299	-0.25272	-0.243733	-0.22901	-0.208367	-0.181886	-0.150016	-0.113571	-0.0735136	-0.0308253	0.0135044	0.0584825	0.103113	0.146395	0.187323	0.224891	0.258092	0.285923	0.307382
0.366013	0.357775	0.341058	0.315639	0.281325	0.238017	0.185766	0.124769	0.055404	-0.0218352	-0.106424	-0.19784	-0.295559	-0.399064	-0.507836	-0.621346	-0.739031	-0.860288	-0.984525	-1.11121	-1.23986	-1.36999	-1.50115	-1.63284	-1.76461	-1.89598	-2.02649	-2.15565	-2.28299	-2.40806	-2.53036	-2.64943	-2.76478	-2.87594	-2.98242	-3.08378	-3.17967	-3.26989	-3.35434	-3.43301	-3.50585	-3.57284	-3.63394	-3.6891	-3.73829	-3.78145	-3.81852	-3.84947	-3.87423	-3.89277
IMF1	IMF2	IMF3	IMF4	IMF5	Residual
0.514154	0.0826891	-0.311359	-0.714682	0.0715252	0.366013
0.0771139	-0.208763	-0.371501	-0.76678	0.114285	0.357775
-1.16024	-0.677933	-0.364728	-0.810029	0.151282	0.341058
-1.63914	-0.322973	-0.28416	-0.83831	0.182038	0.315639
1.58778	0.597297	-0.193641	-0.842753	0.206155	0.281325
-1.03593	0.539461	-0.162691	-0.815501	0.22345	0.238017
0.577884	-0.285518	-0.201806	-0.753969	0.234114	0.185766
-0.848119	-0.421725	-0.26914	-0.658502	0.238616	0.124769
0.320492	-0.111027	-0.299923	-0.530142	0.237456	0.055404
0.76053	-0.0229016	-0.235363	-0.370998	0.231088	-0.0218352
-0.910612	-0.166872	-0.0821575	-0.187968	0.219954	-0.106424
0.73329	0.0814069	0.0804756	0.0089708	0.204497	-0.19784
-0.476496	0.385373	0.203592	0.209102	0.185169	-0.295559
0.808944	0.0415709	0.27018	0.401353	0.162426	-0.399064
-0.836234	-0.388634	0.31973	0.574857	0.136726	-0.507836
-0.021056	-0.251184	0.394247	0.719787	0.108552	-0.621346
0.791324	0.160458	0.48326	0.828774	0.0784855	-0.739031
-0.408479	0.349954	0.554372	0.896469	0.0472122	-0.860288
-0.14137	0.234793	0.578139	0.91996	0.0154032	-0.984525
0.268497	-0.0355063	0.541872	0.899965	-0.0164182	-1.11121
0.0979387	-0.263661	0.442283	0.840337	-0.0478396	-1.23986
-0.48353	-0.216782	0.285329	0.746232	-0.0784737	-1.36999
0.514862	0.110808	0.0974501	0.622852	-0.107935	-1.50115
-0.422755	0.306486	-0.0768072	0.475305	-0.135835	-1.63284
0.346154	0.161714	-0.197673	0.308614	-0.161786	-1.76461
-0.0252377	-0.178441	-0.239033	0.127815	-0.1854	-1.89598
-0.197935	-0.362841	-0.184811	-0.0613892	-0.206288	-2.02649
-0.146596	-0.147633	-0.0380422	-0.251979	-0.224063	-2.15565
0.250322	0.234874	0.159118	-0.436032	-0.238337	-2.28299
0.155594	0.319069	0.34893	-0.605171	-0.248725	-2.40806
-0.27148	0.0254887	0.48159	-0.751419	-0.25484	-2.53036
0.350807	-0.266461	0.533364	-0.868503	-0.256299	-2.64943
-1.0021	-0.142518	0.493359	-0.952546	-0.25272	-2.76478
0.931906	0.124399	0.363381	-1.00262	-0.243733	-2.87594
0.872284	0.138302	0.156628	-1.01957	-0.22901	-2.98242
-1.27173	-0.00677221	-0.113914	-1.00465	-0.208367	-3.08378
0.852683	0.0234253	-0.433113	-0.958847	-0.181886	-3.17967
0.560673	0.108319	-0.76675	-0.882701	-0.150016	-3.26989
-0.299178	0.0556864	-1.06608	-0.776262	-0.113571	-3.35434
-0.373945	-0.0658722	-1.2819	-0.639604	-0.0735136	-3.43301
0.306618	-0.179111	-1.36979	-0.474099	-0.0308253	-3.50585
-0.161934	-0.318773	-1.30052	-0.284455	0.0135044	-3.57284
-0.0502002	-0.408801	-1.07618	-0.0779976	0.0584825	-3.63394
0.344689	-0.283976	-0.735742	0.137049	0.103113	-3.6891
-0.710607	0.135491	-0.336798	0.352307	0.146395	-3.73829
0.416696	0.56772	0.063607	0.55939	0.187323	-3.78145
0.70104	0.54442	0.417533	0.749898	0.224891	-3.81852
-0.367994	-0.0352498	0.706943	0.915406	0.258092	-3.84947
-0.627694	-0.560227	0.939248	1.04742	0.285923	-3.87423
0.17408	-0.465621	1.12518	1.13742	0.307382	-3.89277
-0.44917	0.117795	1.25984	1.17704	0.321492	-3.90505
0.836046	0.40584	1.31613	1.15867	0.327389	-3.91105
-0.694957	0.111719	1.25773	1.07817	0.324567	-3.91085
0.264803	-0.0884142	1.04724	0.940174	0.313142	-3.90453
-0.240595	0.0915348	0.673748	0.755367	0.293718	-3.89214
0.580202	0.137386	0.201316	0.535658	0.267014	-3.87375
-0.348545	-0.104211	-0.283975	0.293004	0.233766	-3.84941
-0.142448	-0.23962	-0.69725	0.0393639	0.194721	-3.81922
0.153918	-0.0981414	-0.971414	-0.213308	0.150631	-3.78325
-0.121978	0.0785856	-1.09373	-0.453165	0.102255	-3.74162
0.446982	0.0215878	-1.08023	-0.66943	0.050358	-3.69441
-0.537924	-0.14478	-0.955962	-0.854935	-0.00429395	-3.64173
-0.154734	-0.0995842	-0.750921	-1.00623	-0.060928	-3.58367
0.392784	0.0705594	-0.50191	-1.1213	-0.118728	-3.52034
0.338887	0.0504148	-0.246772	-1.19863	-0.176713	-3.45176
-0.735628	-0.0983754	-0.0353686	-1.23726	-0.233632	-3.37785
0.818725	-0.0683028	0.0826598	-1.23737	-0.287973	-3.29845
-0.821373	0.240169	0.0927672	-1.20308	-0.337968	-3.21329
0.0498363	0.503683	0.0347937	-1.14695	-0.381703	-3.12204
0.841208	0.414393	-0.027789	-1.08643	-0.417248	-3.02436
0.284709	-0.144881	-0.0240709	-1.03942	-0.442724	-2.91995
-0.971774	-0.639868	0.107389	-1.01875	-0.456603	-2.80862
-0.0498854	-0.504282	0.392293	-1.02347	-0.458525	-2.69065
0.625378	0.0704323	0.766559	-1.04487	-0.449121	-2.56672
-0.446446	0.578135	1.12546	-1.07301	-0.429257	-2.43759
0.647555	0.536276	1.36543	-1.09793	-0.399803	-2.30402
-0.453082	0.154797	1.41674	-1.10995	-0.361614	-2.16678
-0.376759	-0.11817	1.26512	-1.10119	-0.315547	-2.02662
0.469299	-0.236667	0.940458	-1.06732	-0.262476	-1.88429
0.32009	-0.444765	0.497568	-1.00709	-0.203352	-1.74059
-0.496106	-0.580754	-0.0306806	-0.920094	-0.139202	-1.59632
-0.0837902	-0.267016	-0.615713	-0.80588	-0.0711601	-1.45234
0.21919	0.334185	-1.19537	-0.663808	-0.000496771	-1.30955
0.291026	0.709593	-1.69778	-0.493045	0.0713816	-1.16889
-0.612475	0.652056	-2.06293	-0.292572	0.142976	-1.03138
-0.578868	0.336598	-2.24411	-0.0616008	0.212767	-0.897995
-0.00564132	-0.145608	-2.1886	0.197001	0.279232	-0.769748
1.40825	-0.859838	-1.84736	0.471491	0.340849	-0.647637
2.21295	-1.35757	-1.20141	0.747483	0.396097	-0.532665
-2.55828	-0.734599	-0.291667	1.01045	0.443453	-0.425835
2.39773	0.977044	0.716487	1.24588	0.481393	-0.328154
-1.64797	1.5473	1.62738	1.43925	0.508396	-0.240629
-1.12684	0.558213	2.26502	1.57602	0.522943	-0.164268
0.670669	-0.793202	2.53812	1.64169	0.523513	-0.100077
1.10786	-1.42525	2.39536	1.62574	0.508842	-0.0488674
-0.52518	-1.03331	1.82057	1.53366	0.478901	-0.0106783
[truncated: 46 more columns]

## Sheet: CGD
0.0103317	0.00202625	-0.00111373	-0.00076704	3.41639e-05	0.00085894	0.000706374	-0.0023705	-0.000908083	-0.000210449	0.00422147	-0.00109942	-0.00124865	0.00061041	0.000929315	-0.0033636	0.000882233	0.000959072	0.000235134	0.00053218	-3.52682e-05	-0.000331585	-0.000377312	0.000135564	-7.48277e-05	-0.000189213	-5.0386e-06	0.000737883	-0.000118173	-0.000779103	-0.000697609	0.00205686	-0.000477037	6.97508e-05	0.000406356	-0.00300534	0.00168211	0.00157452	-0.00277769	0.000339254	0.000813511	0.000673638	0.000348121	-0.00131349	0.0002883	9.23274e-05	-0.000233216	0.000842576	-0.00029543	-0.00052212
0.00775834	0.00792492	0.00554112	0.00186452	-0.00168962	-0.00475129	-0.00693546	-0.00643063	-0.00210103	0.00391695	0.0078546	0.00756378	0.00384117	-0.00114551	-0.00516752	-0.00639145	-0.00413176	-0.000293607	0.00230294	0.00268629	0.00186452	0.00104434	0.00051891	-4.01137e-07	-0.000590057	-0.000974933	-0.00130402	-0.00158718	-0.00137862	7.35128e-05	0.00262007	0.00447605	0.00394113	0.0010497	-0.00224576	-0.00386255	-0.00322041	-0.00190159	-0.000568726	0.00122376	0.00259162	0.00226019	0.000436934	-0.00126378	-0.00147829	-0.000405928	0.000733303	0.000917062	0.000249366	-0.000196079
0.0112839	0.0118897	0.0110124	0.00909292	0.00692648	0.00530025	0.00473843	0.00526374	0.00631616	0.00704024	0.00656209	0.00434764	0.00051368	-0.00413324	-0.00844976	-0.0113462	-0.0121722	-0.0109486	-0.00820857	-0.00473676	-0.00129627	0.00163719	0.00393696	0.00574523	0.00735052	0.00900881	0.0107667	0.0124224	0.0135533	0.0136278	0.0120846	0.00855488	0.0030943	-0.00366929	-0.0107174	-0.0169096	-0.021264	-0.0232732	-0.0230107	-0.0209579	-0.0177664	-0.0140153	-0.0101158	-0.00628082	-0.00258073	0.000908361	0.0040054	0.00644515	0.00800251	0.00858721
0.0897128	0.089592	0.0884502	0.086263	0.083054	0.0788767	0.0738139	0.067969	0.061458	0.0544025	0.0469365	0.0392029	0.0313647	0.0235942	0.0160503	0.00886499	0.00212968	-0.00411698	-0.00989114	-0.015255	-0.020302	-0.0251485	-0.0299289	-0.0347919	-0.039876	-0.0453004	-0.0511573	-0.0574925	-0.0642862	-0.0714573	-0.0788651	-0.0863156	-0.0935718	-0.100367	-0.106422	-0.111461	-0.115223	-0.117477	-0.118057	-0.116915	-0.114124	-0.109838	-0.104249	-0.0975772	-0.0900616	-0.0819474	-0.0734668	-0.06483	-0.0562156	-0.0477668
1.51158	1.5123	1.51291	1.51341	1.51382	1.51413	1.51437	1.51454	1.51465	1.51471	1.51472	1.51471	1.51468	1.51466	1.51465	1.51467	1.51475	1.51487	1.51505	1.51528	1.51555	1.51586	1.51619	1.51652	1.51686	1.51718	1.51748	1.51776	1.51801	1.51827	1.51854	1.51885	1.51925	1.51976	1.52044	1.52131	1.52241	1.52378	1.52544	1.52738	1.52961	1.53209	1.53481	1.53771	1.54078	1.54397	1.54724	1.55058	1.55394	1.5573
IMF1	IMF2	IMF3	IMF4	Residual
0.0103317	0.00775834	0.0112839	0.0897128	1.51158
0.00202625	0.00792492	0.0118897	0.089592	1.5123
-0.00111373	0.00554112	0.0110124	0.0884502	1.51291
-0.00076704	0.00186452	0.00909292	0.086263	1.51341
3.41639e-05	-0.00168962	0.00692648	0.083054	1.51382
0.00085894	-0.00475129	0.00530025	0.0788767	1.51413
0.000706374	-0.00693546	0.00473843	0.0738139	1.51437
-0.0023705	-0.00643063	0.00526374	0.067969	1.51454
-0.000908083	-0.00210103	0.00631616	0.061458	1.51465
-0.000210449	0.00391695	0.00704024	0.0544025	1.51471
0.00422147	0.0078546	0.00656209	0.0469365	1.51472
-0.00109942	0.00756378	0.00434764	0.0392029	1.51471
-0.00124865	0.00384117	0.00051368	0.0313647	1.51468
0.00061041	-0.00114551	-0.00413324	0.0235942	1.51466
0.000929315	-0.00516752	-0.00844976	0.0160503	1.51465
-0.0033636	-0.00639145	-0.0113462	0.00886499	1.51467
0.000882233	-0.00413176	-0.0121722	0.00212968	1.51475
0.000959072	-0.000293607	-0.0109486	-0.00411698	1.51487
0.000235134	0.00230294	-0.00820857	-0.00989114	1.51505
0.00053218	0.00268629	-0.00473676	-0.015255	1.51528
-3.52682e-05	0.00186452	-0.00129627	-0.020302	1.51555
-0.000331585	0.00104434	0.00163719	-0.0251485	1.51586
-0.000377312	0.00051891	0.00393696	-0.0299289	1.51619
0.000135564	-4.01137e-07	0.00574523	-0.0347919	1.51652
-7.48277e-05	-0.000590057	0.00735052	-0.039876	1.51686
-0.000189213	-0.000974933	0.00900881	-0.0453004	1.51718
-5.0386e-06	-0.00130402	0.0107667	-0.0511573	1.51748
0.000737883	-0.00158718	0.0124224	-0.0574925	1.51776
-0.000118173	-0.00137862	0.0135533	-0.0642862	1.51801
-0.000779103	7.35128e-05	0.0136278	-0.0714573	1.51827
-0.000697609	0.00262007	0.0120846	-0.0788651	1.51854
0.00205686	0.00447605	0.00855488	-0.0863156	1.51885
-0.000477037	0.00394113	0.0030943	-0.0935718	1.51925
6.97508e-05	0.0010497	-0.00366929	-0.100367	1.51976
0.000406356	-0.00224576	-0.0107174	-0.106422	1.52044
-0.00300534	-0.00386255	-0.0169096	-0.111461	1.52131
0.00168211	-0.00322041	-0.021264	-0.115223	1.52241
0.00157452	-0.00190159	-0.0232732	-0.117477	1.52378
-0.00277769	-0.000568726	-0.0230107	-0.118057	1.52544
0.000339254	0.00122376	-0.0209579	-0.116915	1.52738
0.000813511	0.00259162	-0.0177664	-0.114124	1.52961
0.000673638	0.00226019	-0.0140153	-0.109838	1.53209
0.000348121	0.000436934	-0.0101158	-0.104249	1.53481
-0.00131349	-0.00126378	-0.00628082	-0.0975772	1.53771
0.0002883	-0.00147829	-0.00258073	-0.0900616	1.54078
9.23274e-05	-0.000405928	0.000908361	-0.0819474	1.54397
-0.000233216	0.000733303	0.0040054	-0.0734668	1.54724
0.000842576	0.000917062	0.00644515	-0.06483	1.55058
-0.00029543	0.000249366	0.00800251	-0.0562156	1.55394
-0.00052212	-0.000196079	0.00858721	-0.0477668	1.5573
-0.000356089	0.000150168	0.00828288	-0.0395971	1.56065
0.000545211	0.000837516	0.00729446	-0.0317857	1.56396
-0.00064998	0.000793146	0.00589131	-0.0243835	1.56723
-0.000389715	-8.91913e-05	0.00436206	-0.0174191	1.57045
0.000159279	-0.000880866	0.00295155	-0.0108955	1.5736
0.000115867	-0.00089022	0.00183067	-0.00479395	1.5767
-1.02465e-05	-0.000534601	0.00108267	0.000917104	1.57974
4.59936e-05	-0.000328173	0.000712633	0.00626929	1.58274
0.000124567	-0.00012513	0.00069922	0.0112948	1.58568
0.00011386	0.000203871	0.000996287	0.0160197	1.58857
-0.000355911	0.000408394	0.00149775	0.0204617	1.59142
-0.00039367	0.000462951	0.0020428	0.0246274	1.59422
1.13318e-05	0.000522427	0.00247613	0.0285112	1.59697
0.000982793	0.000531955	0.00274392	0.0321015	1.59966
-0.000131596	0.000351985	0.00289604	0.0353814	1.60229
-0.000428167	-0.000265769	0.00304779	0.0383379	1.60487
-0.00021836	-0.00114697	0.0033229	0.0409793	1.60739
-0.000338825	-0.00152893	0.00376293	0.0433308	1.60987
9.07167e-06	-0.000887637	0.00431103	0.0454288	1.61231
-3.84381e-05	0.00044643	0.00478943	0.0473267	1.61473
0.000581043	0.00154784	0.00498369	0.0490943	1.61713
-0.000563145	0.00149354	0.00470685	0.0508225	1.61951
-0.000210638	0.000384376	0.00391587	0.0526215	1.6219
0.000318988	-0.000715222	0.00272743	0.054616	1.62431
0.000228501	-0.00132693	0.00130379	0.0569472	1.62674
-0.000917121	-0.00131262	-0.000222309	0.0597626	1.62922
0.000535502	-0.000481574	-0.00180662	0.0632085	1.63177
0.000662589	0.000923214	-0.00347217	0.0674065	1.63439
9.09168e-05	0.00214373	-0.00518268	0.0724396	1.63711
-0.000932684	0.00267058	-0.00673241	0.0783579	1.63993
0.000137501	0.00198297	-0.00770233	0.0851697	1.64285
0.00105465	-0.000614501	-0.00752709	0.0928118	1.64586
0.00097111	-0.00462876	-0.00567662	0.101132	1.64892
-0.00310922	-0.00696117	-0.00198324	0.109899	1.65202
0.000117356	-0.00510953	0.00317644	0.11883	1.6551
-0.00074267	0.000501017	0.00886489	0.127627	1.65811
-0.000994111	0.00671016	0.0138874	0.135998	1.661
0.00516866	0.00917383	0.0171079	0.143665	1.66373
-0.0015872	0.00598241	0.0177984	0.15038	1.66626
-0.00183364	0.000173222	0.015997	0.155936	1.66854
-0.000413339	-0.00400817	0.0124783	0.160184	1.67056
0.000428273	-0.0052883	0.00832982	0.163027	1.67228
0.000434198	-0.00441085	0.00460929	0.16442	1.67371
-2.73888e-05	-0.00255791	0.00212843	0.164369	1.67483
-0.000290852	-0.000857093	0.00129971	0.162921	1.67566
-0.00012061	0.000381252	0.00210676	0.160157	1.67619
[truncated: 46 more columns]

## Sheet: FSI
0.604926	0.948695	-0.233787	-0.775572	0.580895	-0.239927	0.035349	-0.0799637	0.128415	0.0752754	-0.582603	0.862	0.240501	-1.25816	1.2941	-1.13667	-0.646866	0.716404	-0.382198	-0.118397	0.156609	-0.16205	0.396756	-0.517304	0.0494094	0.539812	-0.312881	-0.150672	-0.185246	0.157512	0.145456	-0.242579	0.153717	0.135738	-0.197488	-0.517949	0.80297	-0.788298	-1.01491	1.06313	-0.40522	-0.752726	-0.225613	0.249578	-0.306659	0.308022	-0.0797497	0.0930144	-0.146356	-0.308616
0.025641	0.073484	-0.0200108	-0.0856912	0.00717498	0.0749799	-0.00856432	-0.0802868	-0.0509739	0.0536139	0.141908	0.0533148	-0.129105	-0.182708	0.00934825	0.154531	0.159517	0.0654011	-0.0589422	-0.125462	-0.0422012	0.0818642	0.022244	-0.0755733	0.0132838	0.116428	0.0455002	-0.0312703	0.0816781	0.183106	0.0559659	-0.231848	-0.478326	-0.622427	-0.625411	-0.44968	-0.183877	0.171244	0.561379	0.800592	0.55739	0.0157705	-0.450642	-0.560848	-0.243966	0.165304	0.264389	0.0695837	-0.117267	-0.0911652
0.200575	0.195882	0.184972	0.171616	0.16073	0.152623	0.145271	0.134516	0.117953	0.0993448	0.086611	0.0881799	0.105403	0.134688	0.165426	0.178485	0.155316	0.0916951	0.00072779	-0.0973865	-0.178878	-0.2163	-0.188967	-0.100763	0.0251025	0.133085	0.165439	0.0964683	-0.0625834	-0.246766	-0.391618	-0.472158	-0.475852	-0.393888	-0.230541	-0.0143339	0.21442	0.413852	0.542452	0.556919	0.425846	0.193664	-0.0755977	-0.318332	-0.479037	-0.527575	-0.443201	-0.233956	0.0235878	0.244964
1.25442	1.26717	1.27194	1.26911	1.25921	1.24257	1.21922	1.18889	1.15094	1.10427	1.0473	0.977969	0.893989	0.793128	0.673798	0.535719	0.380186	0.21015	0.0305152	-0.15324	-0.335633	-0.511077	-0.672885	-0.811651	-0.917182	-0.979474	-0.989712	-0.945452	-0.853304	-0.722234	-0.561348	-0.379933	-0.187271	0.00743824	0.19445	0.363865	0.505783	0.610306	0.667532	0.669524	0.617927	0.523285	0.397876	0.253979	0.103871	-0.0401822	-0.167382	-0.272745	-0.35339	-0.406606
0.280659	0.286702	0.290806	0.292913	0.293091	0.291455	0.288137	0.28327	0.276991	0.269437	0.260748	0.25106	0.240511	0.22924	0.217383	0.205079	0.192464	0.179675	0.16685	0.154123	0.141634	0.129517	0.117911	0.106952	0.0967765	0.0875204	0.0793148	0.0722284	0.0661558	0.0609487	0.0564585	0.0525357	0.0490311	0.0457949	0.0426777	0.0395301	0.0362026	0.0325463	0.0284122	0.0236604	0.0181918	0.0119471	0.00487507	-0.00307493	-0.0119533	-0.0218103	-0.032696	-0.0446603	-0.0577532	-0.0720242
0.135339	0.131467	0.127401	0.123143	0.1187	0.114076	0.109281	0.10432	0.0992018	0.0939315	0.0885154	0.0829592	0.0772687	0.0714495	0.0655071	0.0594471	0.0532747	0.0469954	0.0406144	0.0341372	0.0275693	0.0209162	0.0141832	0.00737566	0.000499402	-0.00643937	-0.0134344	-0.0204808	-0.0275769	-0.034722	-0.0419146	-0.049153	-0.056435	-0.0637583	-0.0711209	-0.0785207	-0.0859556	-0.0934241	-0.100925	-0.108455	-0.116015	-0.123599	-0.131205	-0.138832	-0.146477	-0.154139	-0.161816	-0.169507	-0.17721	-0.184924
IMF1	IMF2	IMF3	IMF4	IMF5	Residual
0.604926	0.025641	0.200575	1.25442	0.280659	0.135339
0.948695	0.073484	0.195882	1.26717	0.286702	0.131467
-0.233787	-0.0200108	0.184972	1.27194	0.290806	0.127401
-0.775572	-0.0856912	0.171616	1.26911	0.292913	0.123143
0.580895	0.00717498	0.16073	1.25921	0.293091	0.1187
-0.239927	0.0749799	0.152623	1.24257	0.291455	0.114076
0.035349	-0.00856432	0.145271	1.21922	0.288137	0.109281
-0.0799637	-0.0802868	0.134516	1.18889	0.28327	0.10432
0.128415	-0.0509739	0.117953	1.15094	0.276991	0.0992018
0.0752754	0.0536139	0.0993448	1.10427	0.269437	0.0939315
-0.582603	0.141908	0.086611	1.0473	0.260748	0.0885154
0.862	0.0533148	0.0881799	0.977969	0.25106	0.0829592
0.240501	-0.129105	0.105403	0.893989	0.240511	0.0772687
-1.25816	-0.182708	0.134688	0.793128	0.22924	0.0714495
1.2941	0.00934825	0.165426	0.673798	0.217383	0.0655071
-1.13667	0.154531	0.178485	0.535719	0.205079	0.0594471
-0.646866	0.159517	0.155316	0.380186	0.192464	0.0532747
0.716404	0.0654011	0.0916951	0.21015	0.179675	0.0469954
-0.382198	-0.0589422	0.00072779	0.0305152	0.16685	0.0406144
-0.118397	-0.125462	-0.0973865	-0.15324	0.154123	0.0341372
0.156609	-0.0422012	-0.178878	-0.335633	0.141634	0.0275693
-0.16205	0.0818642	-0.2163	-0.511077	0.129517	0.0209162
0.396756	0.022244	-0.188967	-0.672885	0.117911	0.0141832
-0.517304	-0.0755733	-0.100763	-0.811651	0.106952	0.00737566
0.0494094	0.0132838	0.0251025	-0.917182	0.0967765	0.000499402
0.539812	0.116428	0.133085	-0.979474	0.0875204	-0.00643937
-0.312881	0.0455002	0.165439	-0.989712	0.0793148	-0.0134344
-0.150672	-0.0312703	0.0964683	-0.945452	0.0722284	-0.0204808
-0.185246	0.0816781	-0.0625834	-0.853304	0.0661558	-0.0275769
0.157512	0.183106	-0.246766	-0.722234	0.0609487	-0.034722
0.145456	0.0559659	-0.391618	-0.561348	0.0564585	-0.0419146
-0.242579	-0.231848	-0.472158	-0.379933	0.0525357	-0.049153
0.153717	-0.478326	-0.475852	-0.187271	0.0490311	-0.056435
0.135738	-0.622427	-0.393888	0.00743824	0.0457949	-0.0637583
-0.197488	-0.625411	-0.230541	0.19445	0.0426777	-0.0711209
-0.517949	-0.44968	-0.0143339	0.363865	0.0395301	-0.0785207
0.80297	-0.183877	0.21442	0.505783	0.0362026	-0.0859556
-0.788298	0.171244	0.413852	0.610306	0.0325463	-0.0934241
-1.01491	0.561379	0.542452	0.667532	0.0284122	-0.100925
1.06313	0.800592	0.556919	0.669524	0.0236604	-0.108455
-0.40522	0.55739	0.425846	0.617927	0.0181918	-0.116015
-0.752726	0.0157705	0.193664	0.523285	0.0119471	-0.123599
-0.225613	-0.450642	-0.0755977	0.397876	0.00487507	-0.131205
0.249578	-0.560848	-0.318332	0.253979	-0.00307493	-0.138832
-0.306659	-0.243966	-0.479037	0.103871	-0.0119533	-0.146477
0.308022	0.165304	-0.527575	-0.0401822	-0.0218103	-0.154139
-0.0797497	0.264389	-0.443201	-0.167382	-0.032696	-0.161816
0.0930144	0.0695837	-0.233956	-0.272745	-0.0446603	-0.169507
-0.146356	-0.117267	0.0235878	-0.35339	-0.0577532	-0.17721
-0.308616	-0.0911652	0.244964	-0.406606	-0.0720242	-0.184924
0.115872	0.0689703	0.387158	-0.429686	-0.087523	-0.192647
0.406438	0.144199	0.430717	-0.420089	-0.104245	-0.200379
-0.432743	0.0294408	0.375439	-0.377283	-0.121956	-0.20811
0.388817	-0.137764	0.255348	-0.306653	-0.140277	-0.215831
-0.2476	-0.235892	0.113289	-0.216562	-0.158809	-0.223531
0.092224	-0.169178	-0.0151486	-0.115819	-0.177153	-0.231199
-0.253852	0.116716	-0.117964	-0.0130024	-0.194908	-0.238825
0.385984	0.336121	-0.193549	0.0840806	-0.211676	-0.246397
-0.335443	0.279779	-0.242468	0.169082	-0.227056	-0.253904
-0.0886468	0.0935841	-0.265411	0.237595	-0.24065	-0.261335
0.307007	-0.115555	-0.261338	0.287104	-0.252058	-0.268677
-0.086561	-0.298558	-0.228999	0.316469	-0.260883	-0.27592
-0.0744843	-0.381442	-0.16921	0.325833	-0.266774	-0.283052
-0.0740863	-0.296716	-0.0868901	0.316403	-0.269572	-0.290068
0.152315	-0.119492	0.00738896	0.289864	-0.269342	-0.296964
-0.0912457	0.0378428	0.0991944	0.24795	-0.26621	-0.303739
-0.0207302	0.166422	0.171061	0.192581	-0.260304	-0.310393
0.105055	0.251533	0.205737	0.126178	-0.251751	-0.316926
-0.0849745	0.249388	0.192734	0.0518248	-0.240682	-0.323337
-0.0216428	0.142757	0.137648	-0.0268249	-0.227224	-0.329627
0.273666	-0.0319716	0.0584609	-0.105731	-0.211506	-0.335796
-0.345788	-0.173813	-0.0238412	-0.18071	-0.193656	-0.341844
-0.1822	-0.174682	-0.0898822	-0.247542	-0.173803	-0.34777
0.235472	-0.0721534	-0.127995	-0.301976	-0.152075	-0.353575
0.405746	-0.00967435	-0.136987	-0.339773	-0.1286	-0.359258
0.0400837	-0.0221828	-0.126704	-0.357547	-0.103514	-0.364821
-0.461458	0.0277844	-0.114278	-0.35407	-0.0770041	-0.370265
0.371476	0.187813	-0.108676	-0.329682	-0.0493803	-0.375593
-0.0476911	0.243596	-0.105148	-0.286256	-0.0209942	-0.380809
-0.101927	0.108977	-0.096117	-0.226744	0.00779888	-0.38592
0.00339949	-0.12686	-0.0771609	-0.154706	0.0366433	-0.390928
0.24712	-0.349692	-0.0456906	-0.0741225	0.0651835	-0.39584
-0.106102	-0.40885	-0.00191722	0.0108279	0.0930637	-0.40066
-0.473602	-0.173323	0.0485846	0.0959056	0.119928	-0.405391
-0.345341	0.289572	0.0947121	0.176898	0.145421	-0.410039
0.614494	0.55238	0.124098	0.249689	0.169187	-0.414609
-0.547519	0.247006	0.128143	0.310536	0.19087	-0.419103
0.288344	-0.271427	0.11389	0.356657	0.210114	-0.423528
0.0891611	-0.574024	0.0916295	0.386236	0.226563	-0.427887
-0.151501	-0.616164	0.0702413	0.398772	0.239865	-0.432186
-0.0333006	-0.466583	0.0561421	0.395095	0.249723	-0.436426
0.125113	-0.258895	0.0519785	0.376886	0.256089	-0.440608
0.0969093	-0.0912673	0.056287	0.346752	0.259129	-0.444725
-0.324328	0.0900414	0.061854	0.30846	0.259055	-0.448771
0.0594577	0.33921	0.0598755	0.266223	0.256082	-0.452738
0.408728	0.580169	0.0438952	0.223746	0.250425	-0.456618
[truncated: 46 more columns]

## Sheet: OGAP
0.00235908	0.00110686	-0.00047295	-0.00110513	0.000431074	-6.87682e-05	2.20932e-05	-8.15968e-05	0.000244203	-0.000201208	-4.4611e-05	6.91772e-05	7.33773e-05	0.000383184	-0.000397098	-0.000188078	-5.64754e-05	0.000142312	0.000140637	-3.36435e-05	2.29446e-05	9.1926e-05	0.000256937	-0.00076293	0.000314063	-0.000136485	0.000740646	-9.93194e-05	-0.00119592	0.000639101	0.000934561	-0.00140829	0.000437207	0.000304647	-0.000121709	-0.000397005	0.000867779	-0.000607614	-0.000309754	0.00110596	-0.00147618	0.000544398	0.000967144	0.00118401	-0.00147598	-0.000411451	9.08381e-06	-0.000245143	0.000586361	-8.18412e-06
0.00263501	0.00169482	-0.000415032	-0.00217107	-0.00256764	-0.00193327	-0.000907717	0.000131027	0.000938885	0.00148729	0.00188739	0.00190911	0.00115194	-0.000368686	-0.00185815	-0.00226324	-0.00132429	0.000310096	0.00163629	0.00200592	0.00143042	0.000186103	-0.00116956	-0.00166259	-0.00083642	0.000454077	0.00101422	0.000620762	0.000188109	0.000177462	-0.000119281	-0.00078908	-0.00103771	-0.000818243	-0.000510731	-0.000294472	-0.000380237	-0.000749556	-0.000687743	0.000230411	0.00193561	0.00365544	0.00386839	0.00158006	-0.00187679	-0.00402561	-0.00382287	-0.0020801	-0.000184976	0.00102898
0.000192973	-0.00040036	-0.000990469	-0.00145102	-0.00165352	-0.00152179	-0.00107321	-0.000399846	0.000363155	0.00106385	0.00157335	0.00184682	0.00191873	0.00187281	0.00178521	0.00169924	0.00159554	0.00138751	0.000963167	0.000232518	-0.000788891	-0.00194937	-0.00303032	-0.00381599	-0.00416566	-0.00411421	-0.00378298	-0.00331866	-0.0028503	-0.00243461	-0.00202177	-0.00152217	-0.000858244	2.75622e-05	0.00114825	0.00245465	0.00383081	0.00509333	0.00600942	0.00636931	0.00602571	0.00486407	0.00287704	0.000329914	-0.00231447	-0.00455373	-0.00594143	-0.00630955	-0.00580608	-0.00466787
0.00234228	0.00236327	0.00230511	0.00217207	0.0019678	0.00169697	0.00137086	0.00100389	0.000610657	0.000205584	-0.000196957	-0.000583934	-0.000947472	-0.00128575	-0.00159839	-0.00188202	-0.00213014	-0.00233512	-0.00249024	-0.00258972	-0.00262789	-0.00259884	-0.0024965	-0.00231479	-0.00204839	-0.00169674	-0.00126922	-0.000779946	-0.000244611	0.000318801	0.000890108	0.00144815	0.00197198	0.00244149	0.00283758	0.003142	0.00333667	0.00340352	0.00332447	0.00308207	0.00266778	0.00210222	0.00141835	0.000650578	-0.000166692	-0.000999044	-0.00181206	-0.00257179	-0.00324913	-0.0038298
-0.000511289	-0.00052215	-0.000530321	-0.00053572	-0.000538265	-0.00053787	-0.000534447	-0.000527911	-0.000518174	-0.000505151	-0.000488755	-0.000468901	-0.000445512	-0.000418513	-0.00038783	-0.000353392	-0.00031513	-0.000272973	-0.000226853	-0.000176718	-0.00012259	-6.46757e-05	-3.34275e-06	6.09858e-05	0.000127879	0.000196906	0.000267645	0.000339679	0.000412598	0.000485994	0.000559456	0.000632575	0.000704942	0.000776146	0.000845778	0.000913428	0.000978688	0.00104115	0.00110036	0.00115581	0.00120695	0.00125321	0.00129405	0.00132892	0.00135725	0.00137851	0.00139214	0.00139758	0.00139428	0.0013817
IMF1	IMF2	IMF3	IMF4	Residual
0.00235908	0.00263501	0.000192973	0.00234228	-0.000511289
0.00110686	0.00169482	-0.00040036	0.00236327	-0.00052215
-0.00047295	-0.000415032	-0.000990469	0.00230511	-0.000530321
-0.00110513	-0.00217107	-0.00145102	0.00217207	-0.00053572
0.000431074	-0.00256764	-0.00165352	0.0019678	-0.000538265
-6.87682e-05	-0.00193327	-0.00152179	0.00169697	-0.00053787
2.20932e-05	-0.000907717	-0.00107321	0.00137086	-0.000534447
-8.15968e-05	0.000131027	-0.000399846	0.00100389	-0.000527911
0.000244203	0.000938885	0.000363155	0.000610657	-0.000518174
-0.000201208	0.00148729	0.00106385	0.000205584	-0.000505151
-4.4611e-05	0.00188739	0.00157335	-0.000196957	-0.000488755
6.91772e-05	0.00190911	0.00184682	-0.000583934	-0.000468901
7.33773e-05	0.00115194	0.00191873	-0.000947472	-0.000445512
0.000383184	-0.000368686	0.00187281	-0.00128575	-0.000418513
-0.000397098	-0.00185815	0.00178521	-0.00159839	-0.00038783
-0.000188078	-0.00226324	0.00169924	-0.00188202	-0.000353392
-5.64754e-05	-0.00132429	0.00159554	-0.00213014	-0.00031513
0.000142312	0.000310096	0.00138751	-0.00233512	-0.000272973
0.000140637	0.00163629	0.000963167	-0.00249024	-0.000226853
-3.36435e-05	0.00200592	0.000232518	-0.00258972	-0.000176718
2.29446e-05	0.00143042	-0.000788891	-0.00262789	-0.00012259
9.1926e-05	0.000186103	-0.00194937	-0.00259884	-6.46757e-05
0.000256937	-0.00116956	-0.00303032	-0.0024965	-3.34275e-06
-0.00076293	-0.00166259	-0.00381599	-0.00231479	6.09858e-05
0.000314063	-0.00083642	-0.00416566	-0.00204839	0.000127879
-0.000136485	0.000454077	-0.00411421	-0.00169674	0.000196906
0.000740646	0.00101422	-0.00378298	-0.00126922	0.000267645
-9.93194e-05	0.000620762	-0.00331866	-0.000779946	0.000339679
-0.00119592	0.000188109	-0.0028503	-0.000244611	0.000412598
0.000639101	0.000177462	-0.00243461	0.000318801	0.000485994
0.000934561	-0.000119281	-0.00202177	0.000890108	0.000559456
-0.00140829	-0.00078908	-0.00152217	0.00144815	0.000632575
0.000437207	-0.00103771	-0.000858244	0.00197198	0.000704942
0.000304647	-0.000818243	2.75622e-05	0.00244149	0.000776146
-0.000121709	-0.000510731	0.00114825	0.00283758	0.000845778
-0.000397005	-0.000294472	0.00245465	0.003142	0.000913428
0.000867779	-0.000380237	0.00383081	0.00333667	0.000978688
-0.000607614	-0.000749556	0.00509333	0.00340352	0.00104115
-0.000309754	-0.000687743	0.00600942	0.00332447	0.00110036
0.00110596	0.000230411	0.00636931	0.00308207	0.00115581
-0.00147618	0.00193561	0.00602571	0.00266778	0.00120695
0.000544398	0.00365544	0.00486407	0.00210222	0.00125321
0.000967144	0.00386839	0.00287704	0.00141835	0.00129405
0.00118401	0.00158006	0.000329914	0.000650578	0.00132892
-0.00147598	-0.00187679	-0.00231447	-0.000166692	0.00135725
-0.000411451	-0.00402561	-0.00455373	-0.000999044	0.00137851
9.08381e-06	-0.00382287	-0.00594143	-0.00181206	0.00139214
-0.000245143	-0.0020801	-0.00630955	-0.00257179	0.00139758
0.000586361	-0.000184976	-0.00580608	-0.00324913	0.00139428
-8.18412e-06	0.00102898	-0.00466787	-0.0038298	0.0013817
-0.000231722	0.00163757	-0.00314909	-0.00431138	0.00135927
-0.000222691	0.00198753	-0.00150403	-0.00469365	0.00132645
0.000441211	0.00192631	5.68039e-05	-0.00497639	0.00128269
0.000107095	0.00117954	0.00139939	-0.00515937	0.00122742
-0.000378882	0.000191237	0.00243935	-0.00524242	0.00116012
7.38665e-05	-0.000296775	0.00314778	-0.005226	0.00108031
-0.00031718	-0.000226086	0.00358435	-0.00511346	0.000987871
0.000541678	-0.000144044	0.00387765	-0.00491222	0.000883169
-5.24164e-05	-0.000436349	0.00412907	-0.00463216	0.000766833
-0.000418227	-0.000623042	0.0043446	-0.0042817	0.000639551
2.34959e-05	-0.000228748	0.00446685	-0.00386526	0.000502018
0.000175325	0.000437341	0.0044086	-0.00338279	0.000354928
-0.000164779	0.000761244	0.00411048	-0.00283513	0.000198976
0.00075898	0.000347497	0.00359098	-0.00222824	3.48564e-05
-0.000626704	-0.000536559	0.00296223	-0.00157214	-0.000136737
-0.000209875	-0.000888416	0.00236165	-0.000875348	-0.000315108
-0.000489671	-0.000197528	0.00183949	-0.000136434	-0.000499563
0.000157049	0.000820107	0.00126751	0.00065386	-0.000689408
0.0019284	0.000864675	0.000473798	0.00149908	-0.000883948
-0.00176613	-0.000122001	-0.00057413	0.00238647	-0.00108249
-0.000168732	-0.000607993	-0.00170535	0.00329497	-0.00128433
0.000428489	-0.000223205	-0.00268433	0.00420226	-0.00148879
0.000210467	-5.15513e-05	-0.0033611	0.00508712	-0.00169517
0.000125211	-0.000837993	-0.00369854	0.00593182	-0.00190276
-4.8296e-05	-0.00214006	-0.00375235	0.00671699	-0.00211089
-0.00036943	-0.00295644	-0.00354709	0.007416	-0.00231884
9.48435e-05	-0.00297497	-0.00303994	0.0079959	-0.00252594
0.000597041	-0.00284687	-0.00215667	0.00842103	-0.00273148
-0.00025579	-0.00302847	-0.000891141	0.00865538	-0.00293477
-7.05525e-05	-0.00327361	0.000624436	0.00866292	-0.00313509
0.000989613	-0.00342179	0.00210735	0.00840756	-0.00333162
-0.00107071	-0.00304623	0.0032002	0.00785323	-0.00352346
0.00211848	-0.000467998	0.00363825	0.00697242	-0.00370967
-0.00111585	0.0054684	0.00342261	0.00577896	-0.00388934
-0.0103818	0.0132861	0.0026613	0.00432809	-0.00406155
-0.0131349	0.0210211	0.00147101	0.00268624	-0.00422538
-0.0119182	0.02372	-1.47744e-05	0.000920631	-0.0043799
0.00136945	0.0138508	-0.00157038	-0.000901533	-0.00452421
0.0275738	-0.00806945	-0.00286467	-0.00271304	-0.00465737
-0.0293413	-0.0290136	-0.00354456	-0.00444668	-0.00477847
0.0285985	-0.0297787	-0.0033072	-0.00603512	-0.00488659
0.0246247	-0.0140151	-0.00215025	-0.00741023	-0.00498081
0.00506504	0.00749108	-0.000516085	-0.00850592	-0.0050602
-0.00678389	0.0237276	0.00106508	-0.00926743	-0.00512385
-0.0247033	0.0323186	0.00206601	-0.00964298	-0.00517084
-0.0182071	0.0311225	0.00208305	-0.00959637	-0.00520049
[truncated: 46 more columns]
