# Supplementary material for: Macroeconomic Imbalances and Financial Stress Among BRICS: Analysis of Frequency-Dependent and Asymmetric Causal Nexuses
Source: publisher site journal article supplement (doi:10.1515/snde-2024-0045), 2025-04-16
Supplement: Supplementary file 8 [file Data.xlsx]

## Sheet: Brazil
FSI.signal	OGAP.signal	CA.signal	CGD.signal	FSI.IMF1	OGAP.IMF1	CA.IMF1	CGD.IMF1	FSI.IMF2	OGAP.IMF2	CA.IMF2	CGD.IMF2	FSI.IMF3	OGAP.IMF3	CA.IMF3	CGD.IMF3	FSI.IMF4	OGAP.IMF4	CA.IMF4	CGD.IMF4	FSI.Residual	OGAP.Residual	CA.Residual	CGD.Residual
-0.520282	0.00300355	-3.69319	1.73579	0.240982	-0.000340807	0.221903	-0.0173576	0.282099	0.0037793	0.415425	-0.0169292	-0.130817	-0.0014758	0.440601	-0.0106945	-0.229335	-8.41073e-05	-1.71347	-0.00842543	-0.68321	0.00112497	-1.93855	1.7892
-0.342916	0.00761848	-3.28041	1.76057	0.358442	0.00268967	0.510229	-0.00561126	0.379333	0.00539834	0.530456	-0.00817113	-0.138965	-0.00154952	0.577966	-0.00984368	-0.26571	-0.000133726	-1.92726	-0.00834034	-0.676017	0.00121371	-1.93077	1.79254
-1.28441	0.00490261	-4.49438	1.78534	-0.258722	0.00149016	-0.360304	0.000320827	0.108562	0.00384719	0.145236	0.00529492	-0.184535	-0.00154237	0.718239	-0.00843152	-0.286409	-0.000189915	-2.11387	-0.00792938	-0.663305	0.00129754	-1.92323	1.79609
-1.41838	-0.00185648	-4.40603	1.81012	-0.0197571	-0.00184526	0.187464	0.00952076	-0.212582	0.000312325	-0.375905	0.0150311	-0.249581	-0.00144508	0.847141	-0.00708163	-0.291393	-0.000254946	-2.27119	-0.00719437	-0.64507	0.00137648	-1.91593	1.79984
-1.56435	-0.00354482	-5.0402	1.80681	-0.0133331	-0.000423396	-0.297784	0.000215141	-0.337656	-0.00299259	-0.589856	0.0153039	-0.31087	-0.00124755	0.945618	-0.00632523	-0.281007	-0.000331849	-2.39653	-0.0061511	-0.621482	0.00145057	-1.90891	1.80377
-1.46297	-0.004194	-4.34363	1.80351	0.0339631	0.000511186	0.171949	-0.000824584	-0.299458	-0.00486099	-0.415363	0.00766428	-0.348635	-0.00094064	0.994606	-0.00632542	-0.255951	-0.000423453	-2.48655	-0.00483489	-0.592892	0.00151989	-1.90217	1.80783
-1.18425	-0.0061793	-4.0939	1.8002	0.0933727	-0.00164508	0.0096416	0.000210247	-0.146777	-0.00506334	-0.0310739	-0.00181212	-0.352947	-0.000523337	0.978759	-0.0068599	-0.218142	-0.000532067	-2.53757	-0.00329943	-0.559754	0.00158452	-1.89572	1.81196
-1.26046	-0.00273983	-3.83546	1.79689	-0.347709	0.000132286	-0.0991572	-0.00240277	0.104561	-0.00383856	0.345057	-0.00771512	-0.324429	-1.86076e-05	0.883251	-0.00748881	-0.17032	-0.00065948	-2.54647	-0.00161154	-0.522564	0.00164453	-1.88959	1.81611
-0.207964	-0.000572667	-3.28543	1.80502	0.3526	-0.000379929	0.314586	0.000923787	0.301906	-0.00160697	0.539004	-0.00868551	-0.265444	0.00052139	0.69475	-0.00758218	-0.115218	-0.00080717	-2.51173	0.000156519	-0.481809	0.00170001	-1.88379	1.82021
-0.17985	0.00261237	-4.15258	1.81316	0.238382	-0.000384953	-0.372808	0.00094419	0.253854	0.00118563	0.46779	-0.00745213	-0.178693	0.00103713	0.411482	-0.00646658	-0.0554328	-0.000976464	-2.43327	0.00193296	-0.437961	0.00175103	-1.87834	1.8242
-0.834074	0.00592924	-3.80282	1.82129	-0.40884	-1.82459e-05	0.413731	-0.000197423	0.0333872	0.00384474	0.161743	-0.00632756	-0.0735938	0.00147364	0.0633402	-0.0038377	0.00645711	-0.00116854	-2.31189	0.00364753	-0.391484	0.00179765	-1.87325	1.828
-0.199825	0.00821187	-5.09859	1.83202	0.178811	0.000931337	-0.38223	0.000376984	-0.138025	0.00504779	-0.233258	-0.00522324	0.0343638	0.00177704	-0.300066	6.74534e-05	0.0678546	-0.00138426	-2.14863	0.00523028	-0.342829	0.00183995	-1.86853	1.83156
-0.0801184	0.00657837	-4.79044	1.84274	0.177404	0.000872194	0.139181	-0.000126981	-0.228458	0.00355066	-0.420713	-0.00311574	0.137228	0.00190096	-0.623979	0.00455694	0.126151	-0.00162342	-1.94473	0.0066132	-0.292443	0.00187797	-1.86421	1.83482
-0.17503	0.00226474	-4.70448	1.85347	-0.0639255	0.000656891	0.0555433	-0.00128259	-0.27975	-0.000249168	-0.357029	0.000595391	0.230682	0.00182947	-0.853673	0.00873441	0.178725	-0.0018842	-1.70174	0.00773075	-0.240761	0.00191175	-1.86029	1.83769
0.0349211	-0.00239106	-4.63065	1.8642	-0.073815	0.000361229	-0.300656	-0.00122648	-0.229071	-0.0040834	-0.203737	0.00505153	0.303051	0.00155263	-0.947177	0.0117233	0.222961	-0.00216285	-1.42209	0.00851953	-0.188205	0.00194133	-1.8568	1.84013
0.189526	-0.0072941	-3.68069	1.87493	-0.284281	-0.00294057	0.148775	0.0038005	0.0112311	-0.00492613	-0.164474	0.0073061	0.34141	0.00106005	-0.88607	0.0128279	0.256353	-0.00245422	-1.11003	0.00892239	-0.135187	0.00196677	-1.85375	1.84207
1.00888	0.000673109	-2.64473	1.86835	0.203968	0.00287497	0.681232	-0.00104663	0.277841	-0.00180301	-0.284748	0.00523506	0.332127	0.000365031	-0.684787	0.0117895	0.277023	-0.00275201	-0.77266	0.00890983	-0.0820821	0.00198813	-1.85115	1.84347
1.17197	-0.000708798	-3.47688	1.86178	0.326848	-0.00162165	-0.866627	-0.000887488	0.326556	0.00239194	-0.296921	0.00082529	0.263096	-0.000435145	-0.393088	0.0090145	0.284655	-0.00304941	-0.4182	0.00850892	-0.0291848	0.00200547	-1.84902	1.84432
0.215724	0.00155561	-0.995483	1.85521	-0.354673	-0.0007026	0.501799	0.000109613	0.127712	0.0048013	0.0547754	-0.00264686	0.13927	-0.0012224	-0.0729007	0.00530316	0.280131	-0.00333955	-0.0549755	0.00778399	0.0232835	0.00201886	-1.84738	1.84466
0.160195	0.00258006	0.106418	1.84864	-0.0678313	0.00176577	0.530387	-0.000592313	-0.102327	0.00429085	0.398189	-0.00361386	-0.0093744	-0.00188933	0.219806	0.00151271	0.26459	-0.00361561	0.308683	0.00680576	0.0751379	0.00202837	-1.84624	1.84453
0.256545	-0.0021239	0.165968	1.84588	0.277019	0.000958902	-0.039023	0.00037985	-0.238769	0.00111873	0.385058	-0.00243735	-0.147094	-0.00236481	0.437376	-0.00167628	0.239179	-0.00387081	0.664451	0.00564211	0.12621	0.00203408	-1.84562	1.84397
-0.260653	-0.00917077	0.200055	1.84312	-0.131235	-0.00178704	-0.241471	0.000198722	-0.270854	-0.00273924	0.0953041	-0.00059456	-0.239948	-0.00258217	0.560586	-0.00388436	0.205052	-0.00409839	1.00401	0.00435657	0.176332	0.00203607	-1.84553	1.84304
-0.16372	-0.00920652	0.551761	1.84036	-0.0878664	0.000330088	-0.0173956	-2.05301e-05	-0.198095	-0.0048059	-0.190454	0.000594494	-0.266498	-0.00247293	0.601096	-0.00501838	0.163412	-0.00429218	1.31907	0.00300719	0.225328	0.0020344	-1.84599	1.84179
0.196775	-0.00840159	0.898082	1.83759	0.0486023	-0.000108303	0.122919	-4.23829e-05	-0.0107752	-0.00388	-0.296451	0.000944199	-0.229791	-0.00199414	0.578896	-0.00522947	0.11571	-0.00444833	1.60161	0.00164438	0.273029	0.00202918	-1.84702	1.84028
0.297186	-0.00578248	0.96982	1.83483	-0.128128	-0.00140609	-0.138116	5.48528e-05	0.187713	-0.000613158	-0.18491	0.000711374	-0.145574	-0.00121727	0.51234	-0.00478573	0.0638875	-0.00456642	1.84434	0.000310978	0.319287	0.00202047	-1.84863	1.83854
0.803137	0.00182404	1.45849	1.83207	0.248788	0.0017467	-0.0377172	9.52235e-05	0.212278	0.00298284	0.0670803	0.000234328	-0.0320412	-0.000266358	0.413401	-0.00392427	0.0101537	-0.00464747	2.04156	-0.000958994	0.363959	0.00200832	-1.85083	1.83663
0.45013	0.00292199	1.88744	1.82931	-0.00566498	9.14047e-05	0.183688	5.3364e-05	0.00484425	0.00480229	0.218592	-0.000365511	0.0873002	0.000728233	0.290639	-0.00279575	-0.0432489	-0.0046927	2.18988	-0.00214324	0.406899	0.00199275	-1.85364	1.83456
0.0763206	0.00236256	1.48968	1.82655	-0.256189	-0.00101564	-0.0887172	-0.000346594	-0.19862	0.00446662	0.109364	-0.000765613	0.177246	0.00164106	0.153661	-0.00148314	-0.0940764	-0.00470327	2.28824	-0.00322981	0.44796	0.00197378	-1.85709	1.83237
0.457791	0.00173117	1.35171	1.82523	0.052015	-0.000540327	0.0278555	2.21698e-05	-0.148516	0.0026148	-0.0761945	-0.000593612	0.207456	0.00238559	0.0212244	-6.6028e-05	-0.140167	-0.00468031	2.33764	-0.00421429	0.487002	0.00195141	-1.86117	1.83008
0.578743	0.00224934	1.02426	1.82391	-0.0307253	0.00237066	-0.185212	-5.84705e-05	0.0866032	-0.000378117	-0.0946109	2.65313e-05	0.178889	0.00295627	-0.0824986	0.00134495	-0.179908	-0.00462512	2.34014	-0.00509859	0.523884	0.00192564	-1.86591	1.82769
0.883077	-0.00512771	1.32421	1.82259	0.176848	-0.00250618	0.111382	-1.32165e-05	0.252452	-0.00335236	0.00636869	0.000675992	0.108214	0.00337375	-0.134414	0.00258421	-0.212885	-0.00453937	2.29803	-0.00588523	0.558448	0.00189645	-1.87133	1.82523
0.607403	-0.00353257	1.24106	1.82127	0.0255501	0.000182201	0.13219	0.000718149	0.215583	-0.00482071	-0.0116481	0.000946671	0.0149795	0.00366693	-0.124108	0.00348566	-0.239271	-0.00442484	2.21389	-0.00657109	0.59056	0.00186385	-1.87741	1.82269
0.147005	-0.00194515	1.0445	1.81741	-0.172541	0.0017786	0.170199	-0.00016664	0.0403993	-0.00516333	-0.16133	0.000695877	-0.0816169	0.00389519	-0.0667171	0.00394316	-0.259369	-0.00428346	2.09172	-0.00714782	0.620133	0.00182785	-1.88416	1.82009
0.227815	-0.00480293	0.258393	1.81356	0.19172	-0.00126307	-0.527393	-0.000280054	-0.175513	-0.00532931	-0.136809	8.03961e-05	-0.161975	0.00411767	0.00256069	0.00391626	-0.273535	-0.00411666	1.93702	-0.00759962	0.647118	0.00178845	-1.89154	1.81744
-0.364492	-0.00253134	1.32318	1.80971	-0.183761	0.000440478	0.375342	-0.000121289	-0.364159	-0.00510305	0.190931	-0.000454537	-0.205901	0.00430932	0.0528224	0.00342155	-0.282178	-0.00392371	1.75568	-0.00790309	0.671506	0.00174563	-1.89956	1.81477
-0.233001	-0.00176708	1.05595	1.80586	-0.0406706	-0.000310839	0.0673395	-2.67168e-05	-0.404017	-0.00384568	0.456701	-0.000680452	-0.195839	0.00439191	0.0713265	0.00252196	-0.285797	-0.00370185	1.55327	-0.00802859	0.693323	0.00169939	-1.90818	1.81207
-0.0868617	0.00099898	0.563034	1.80242	-0.107423	0.00017576	-0.114494	0.000216666	-0.278934	-0.00168606	0.427046	-0.000513238	-0.128178	0.00430792	0.0552498	0.00128414	-0.284954	-0.00344836	1.335	-0.00794215	0.712627	0.00164973	-1.91739	1.80937
0.774591	0.00370155	0.204155	1.79898	0.473483	0.00073279	0.0917987	0.0001872	-0.128394	0.000512299	0.185197	-5.383e-05	-0.0197883	0.0040217	0.0137036	-0.0002356	-0.280218	-0.0031619	1.10579	-0.00761104	0.729507	0.00159666	-1.92718	1.8067
0.798806	0.0032645	-0.755798	1.79554	0.164757	-0.001351	-0.206079	-0.000239701	0.0580808	0.00242806	-0.132588	0.000696155	0.10408	0.00349079	-0.0375748	-0.00195943	-0.272179	-0.00284353	0.870311	-0.00700865	0.744067	0.00154019	-1.93753	1.80406
0.357726	0.00495134	-0.897681	1.79301	-0.683263	-0.0015695	0.375026	-0.000117995	0.328341	0.00486819	-0.513089	0.00146564	0.217668	0.00266841	-0.080876	-0.00369917	-0.261429	-0.00249609	0.633127	-0.00611828	0.756409	0.00148033	-1.94842	1.80148
2.02606	0.00601774	-2.32457	1.79048	0.676954	-0.0026442	-0.372344	5.49345e-05	0.533928	0.00783405	-0.871944	0.00149903	0.297107	0.00153371	-0.101187	-0.00513321	-0.248552	-0.00212294	0.398743	-0.00493658	0.766626	0.00141711	-1.95983	1.79899
0.812979	0.0101418	-2.06124	1.78794	-0.402118	0.00163311	0.240259	0.000482314	0.349072	0.00879217	-0.936687	0.000207011	0.325326	9.30119e-05	-0.0888945	-0.00588278	-0.234101	-0.00172706	0.171335	-0.00347802	0.7748	0.00135056	-1.97176	1.79661
0.434686	0.0119387	-2.4817	1.78541	-0.384337	0.00772263	-0.291638	0.0005029	-0.052959	0.00582656	-0.576992	-0.00208275	0.30947	-0.00158039	-0.0478478	-0.00559111	-0.218491	-0.00131079	-0.0455967	-0.00178045	0.781003	0.0012807	-1.98418	1.79436
0.641624	-0.00903684	-1.49903	1.78287	0.16637	-0.00512017	0.253693	-0.00167445	-0.371333	-0.000952141	0.0890723	-0.00370873	0.263286	-0.00329587	0.0020145	-0.00406503	-0.201992	-0.000876218	-0.249363	8.85345e-05	0.785293	0.00120756	-1.99707	1.79223
0.419109	-0.0193533	-1.52845	1.78837	0.0684322	-0.00807131	-0.206395	0.000502423	-0.452339	-0.00715662	0.749254	-0.00294335	0.200089	-0.00483108	0.0377102	-0.00144645	-0.184785	-0.000425402	-0.437815	0.00203214	0.787712	0.00113116	-2.01042	1.79023
0.311808	-0.0163065	-1.08008	1.79387	-0.0875317	-0.0025539	0.153144	-5.70667e-05	-0.351985	-0.00887845	1.08766	-5.98083e-05	0.129936	-0.00596526	0.0378515	0.00171707	-0.166901	3.96001e-05	-0.609343	0.00393946	0.78829	0.00105152	-2.02422	1.78833
0.633617	-0.010623	-1.60407	1.79937	0.0946669	0.00109415	0.0983609	-0.000531158	-0.156572	-0.00666155	0.898308	0.0030219	0.0567093	-0.00654087	-0.00922257	0.00464918	-0.148238	0.000516592	-0.763019	0.00569724	0.78705	0.000968679	-2.03844	1.78654
0.615872	-0.0041805	-2.2857	1.80487	-0.0854872	0.00311537	0.434819	0.0021752	0.0667783	-0.00256986	0.169265	0.00411166	-0.0208151	-0.00661114	-0.0834444	0.00656682	-0.128605	0.00100248	-0.898358	0.00719562	0.784001	0.000882652	-2.05307	1.78482
0.806168	0.000821215	-4.36733	1.80055	-0.0120655	0.00356313	-0.575423	-0.000591144	0.253778	0.00125577	-0.636365	0.00264988	-0.106899	-0.0062834	-0.153019	0.00697495	-0.107788	0.00149224	-1.01519	0.00833445	0.779142	0.000793467	-2.0681	1.78319
1.00017	0.00204155	-3.99908	1.79623	0.205096	0.00142746	0.228265	-0.000588743	0.313611	0.00360223	-0.86255	0.000279115	-0.205428	-0.00566922	-0.185165	0.00589252	-0.0855794	0.00197992	-1.11363	0.00903746	0.772468	0.00070115	-2.0835	1.78161
0.372512	0.00187491	-4.22395	1.79191	-0.241195	-0.00102451	-0.275001	-7.04714e-05	0.22779	0.0047349	-0.455429	-0.0011587	-0.316223	-0.00490044	-0.155745	0.00376721	-0.0618276	0.00245924	-1.19437	0.00926598	0.763968	0.000605725	-2.09926	1.78011
0.413843	0.00396554	-3.12157	1.78759	0.0281744	-0.00086361	0.320524	-0.000184763	0.104387	0.00552622	0.108104	-0.00117802	-0.435955	-0.0041281	-0.0725267	0.00126724	-0.0363943	0.0029238	-1.25866	0.00900926	0.753631	0.000507217	-2.11536	1.77868
0.34687	0.00667305	-3.16851	1.78404	0.197249	0.000347163	-0.0331353	4.31656e-05	-0.0258679	0.00602626	0.417811	-0.000710076	-0.556809	-0.00347313	0.047158	-0.000899347	-0.00915275	0.00336711	-1.30813	0.00827102	0.74145	0.000405652	-2.13179	1.77733
-0.266114	0.00710362	-3.19211	1.78048	-0.171962	0.000614352	-0.0540787	0.000266797	-0.17366	0.00536491	0.38969	-0.000785748	-0.667903	-0.0029589	0.179056	-0.00213957	0.0199884	0.00378221	-1.34433	0.00706641	0.727423	0.000301054	-2.14853	1.77607
-0.139905	0.00324765	-3.1091	1.77692	0.153865	-0.00146518	0.191627	0.00023868	-0.296132	0.00287847	0.21006	-0.00153538	-0.760281	-0.00252068	0.287069	-0.00213318	0.0510873	0.0041616	-1.36872	0.00543346	0.711555	0.000193449	-2.16557	1.77491
-0.543595	0.0043401	-3.75751	1.77336	-0.174472	0.00292605	-0.327934	-0.000921227	-0.318326	-0.00110228	0.1057	-0.0021598	-0.828796	-0.00206405	0.339281	-0.000916327	0.0841445	0.00449753	-1.3828	0.00344713	0.693855	8.28614e-05	-2.18288	1.77391
-0.102659	-0.0042994	-3.12213	1.77428	0.18871	-0.00350277	0.36343	0.000358706	-0.215593	-0.00405655	0.122032	-0.00152136	-0.869121	-0.00149162	0.330469	0.00111424	0.119015	0.00478222	-1.38819	0.00121555	0.67433	-3.0683e-05	-2.20045	1.77312
-0.202739	0.000699255	-4.017	1.77521	-0.137757	0.000440445	-0.342749	-1.79217e-05	0.00306308	-0.00388209	0.029152	0.000470171	-0.876429	-0.000720063	0.286047	0.00327917	0.155401	0.00500812	-1.38633	-0.00113493	0.652982	-0.000147159	-2.21826	1.77261
0.233771	0.00613215	-3.52014	1.77614	-0.0419639	0.00315197	0.506636	-0.000378246	0.298265	-0.0022074	-0.230894	0.00272096	-0.84507	0.000285991	0.233305	0.00479035	0.192741	0.00516812	-1.37786	-0.00347474	0.629799	-0.000266533	-2.2363	1.77248
0.775972	0.00463614	-4.78438	1.77706	0.19411	-0.000710498	-0.604364	0.00116128	0.51503	-0.00103609	-0.309211	0.00384629	-0.768165	0.00151582	0.185353	0.00495418	0.230237	0.00525565	-1.36171	-0.00568425	0.604759	-0.000388736	-2.25455	1.77278
0.643632	0.00529662	-3.59977	1.7722	-0.0686386	-0.00194707	0.367928	-0.000318077	0.506236	-0.00040725	-0.0391385	0.00316867	-0.638817	0.00290021	0.13901	0.00341647	0.267015	0.00526434	-1.33495	-0.00766486	0.577836	-0.0005136	-2.273	1.7736
0.543533	0.0104392	-3.43492	1.76734	-0.131151	0.00116993	0.289791	5.29814e-05	0.277198	0.000424379	0.261894	0.00134311	-0.453693	0.00429811	0.07321	0.000306793	0.302173	0.00518769	-1.2938	-0.0093377	0.549007	-0.00064088	-2.29162	1.77497
0.748239	0.0113905	-4.17071	1.76247	0.204946	-1.98146e-05	-0.471775	0.00041128	-0.0931448	0.0016115	0.36593	-0.000444627	-0.216607	0.00555005	-0.035376	-0.00381322	0.3348	0.00501907	-1.23462	-0.0106364	0.518244	-0.000770305	-2.3104	1.77696
0.241884	0.011669	-3.38995	1.75761	-0.181958	-0.000948297	0.456367	-0.00149215	-0.488032	0.00224577	0.328323	-0.000923877	0.0623701	0.00652123	-0.199922	-0.00807478	0.363979	0.00475185	-1.15528	-0.0114975	0.485525	-0.000901593	-2.32933	1.7796
0.559586	0.0147218	-4.44455	1.75992	0.0368899	0.00242219	-0.44182	0.00089148	-0.687121	0.001886	0.300185	-0.000605761	0.370202	0.00706792	-0.407607	-0.0114505	0.388788	0.00438015	-1.05536	-0.0118579	0.450828	-0.00103445	-2.34838	1.78294
0.918785	0.00903179	-3.96798	1.76223	-0.034197	-0.00218214	0.255706	0.00192582	-0.558191	0.0014249	0.180978	-0.00203936	0.688737	0.00705379	-0.612616	-0.0130004	0.408297	0.00390384	-0.93538	-0.0116662	0.414141	-0.00116859	-2.36754	1.78701
1.50521	0.0089522	-4.33935	1.76453	-0.17066	-0.00155672	0.239974	0.00135302	-0.0966146	0.00207636	-0.152983	-0.00550769	0.975455	0.00640131	-0.760274	-0.0121733	0.421563	0.00333497	-0.796241	-0.0109166	0.375465	-0.00130371	-2.3868	1.79178
1.98047	0.0113878	-5.08931	1.76684	-0.457245	0.00185543	-0.223053	-0.00460914	0.496287	0.00312113	-0.545443	-0.00708775	1.17898	0.00516059	-0.801632	-0.00897786	0.42762	0.00269019	-0.639541	-0.00967326	0.334825	-0.00143953	-2.40614	1.79719
3.30275	0.0085752	-4.9917	1.78774	0.671827	0.00221736	-0.33305	5.80326e-05	0.665583	0.00250763	-0.603961	-0.00339216	1.24755	0.00343931	-0.699768	-0.00403332	0.425518	0.00198665	-0.468583	-0.0080344	0.29227	-0.00157576	-2.42553	1.80314
1.2995	-0.000559165	-3.63448	1.80864	-0.637013	-0.00129713	0.217786	0.000435756	0.125856	-0.000183285	-0.212419	0.00317631	1.14806	0.00139179	-0.461077	0.00158711	0.414701	0.00124156	-0.288646	-0.00610295	0.247892	-0.0017121	-2.44497	1.80955
1.02541	-0.00643198	-2.76265	1.82955	-0.0687741	-0.000861185	0.0770862	0.00342286	-0.419849	-0.00346707	0.291332	0.00707428	0.916469	-0.000727567	-0.134294	0.00672984	0.395696	0.000472095	-0.10557	-0.0039823	0.201863	-0.00184825	-2.46444	1.8163
0.671022	-0.00970186	-1.96888	1.8368	0.075959	0.000845001	0.0718252	-0.00105052	-0.535799	-0.00562237	0.550733	0.00588595	0.607189	-0.002636	0.223578	0.0104336	0.369287	-0.000304553	0.0747787	-0.00177552	0.154386	-0.00198393	-2.48391	1.8233
0.33845	-0.0147865	-1.66526	1.84405	-0.0123479	-0.00156366	-0.0255194	-0.00111038	-0.371831	-0.00596399	0.440398	0.00196631	0.280704	-0.00406883	0.55942	0.0123207	0.33625	-0.0010712	0.246536	0.000416241	0.105674	-0.00211885	-2.50339	1.83046
0.312375	-0.0125445	-1.52205	1.8513	0.224583	0.00153989	0.0670256	-0.000155008	-0.263686	-0.00515699	0.0546672	-0.00128493	-0.00182766	-0.00486396	0.832732	0.012579	0.297361	-0.00181068	0.40384	0.00250015	0.0559444	-0.00225272	-2.52284	1.83766
-0.161867	-0.013846	-1.38762	1.85855	0.0419987	4.8089e-05	0.258328	0.00036737	-0.255441	-0.00400095	-0.323151	-0.00276925	-0.207233	-0.00500141	1.00903	0.0117191	0.253394	-0.00250647	0.540831	0.0044009	0.0054135	-0.00238523	-2.54225	1.84484
-0.597531	-0.0137339	-2.15502	1.86581	-0.264295	-0.00129413	-0.671253	0.000390724	-0.141947	-0.00221358	-0.334862	-0.00287822	-0.350742	-0.00456504	1.06256	0.0103262	0.205156	-0.003145	0.651854	0.00606395	-0.0457031	-0.00251611	-2.5616	1.8519
-0.00265007	-0.00899669	-0.550981	1.87322	0.23115	0.000464664	0.564567	6.25498e-05	0.16977	0.000589879	0.0148228	-0.00192539	-0.459906	-0.0036879	0.989297	0.00882208	0.153525	-0.00371828	0.732796	0.00745591	-0.0971896	-0.00264505	-2.58089	1.85881
-0.262645	-0.00520608	-0.824136	1.88064	-0.0659016	0.000716068	0.202693	-0.000482735	0.409573	0.00359057	0.232663	-0.000322723	-0.556896	-0.0025197	0.797291	0.00736957	0.099405	-0.00422124	0.783441	0.00856928	-0.148826	-0.00277177	-2.60008	1.86551
-0.320216	-0.00327157	-1.64447	1.88806	0.0569789	-0.000292634	-0.28108	-0.00049611	0.441826	0.00578017	0.155639	0.00123814	-0.66234	-0.00121367	0.501705	0.00591931	0.0437023	-0.00464946	0.805953	0.00942052	-0.200383	-0.00289598	-2.61917	1.87197
-0.831272	-0.000928936	-2.06393	1.89547	-0.126305	-7.62548e-06	-0.184608	0.00107013	0.34732	0.00702389	-0.00626109	0.00188612	-0.787938	7.07333e-05	0.13597	0.00427282	-0.0127158	-0.00499856	0.802924	0.0100429	-0.251633	-0.00301738	-2.63813	1.8782
-0.994455	0.00104593	-2.30862	1.89786	0.1228	0.000441399	0.0614086	-0.000281493	0.185878	0.00782973	-0.0925361	0.00124649	-0.931748	0.00117466	-0.258308	0.00223958	-0.0690341	-0.00526417	0.77703	0.0104779	-0.302349	-0.00313569	-2.65696	1.88418
-1.39657	0.00100597	-2.38959	1.90025	0.133165	-0.00114663	0.427649	-0.000245453	0.0339072	0.00888341	-0.132645	5.83816e-05	-1.08685	0.00196174	-0.635893	-0.000243558	-0.124486	-0.00544192	0.731044	0.0107701	-0.352308	-0.00325062	-2.67564	1.88991
-2.20795	0.00486194	-3.718	1.90265	-0.373277	0.000941128	-0.600967	1.04574e-05	-0.0141404	0.0104622	-0.0699229	-0.000670174	-1.24092	0.00234819	-0.952024	-0.00305438	-0.178323	-0.00552767	0.667811	0.0109596	-0.401288	-0.00336192	-2.69414	1.8954
-1.9344	0.00301169	-3.18993	1.90504	0.078473	-0.00230399	-0.0255791	-0.000107752	0.0342043	0.0119873	0.154229	-0.000647946	-1.36819	0.00231767	-1.16272	-0.00591525	-0.22983	-0.00552	0.590208	0.0110779	-0.449063	-0.0034693	-2.71245	1.90063
-1.85915	0.00369155	-2.43644	1.90813	0.377009	-0.00317736	0.729224	0.000113076	-0.0279	0.0139603	0.288769	-0.000270972	-1.43455	0.00190797	-1.2259	-0.00845476	-0.2783	-0.00542678	0.501114	0.0111502	-0.495411	-0.00357253	-2.73056	1.90559
-2.87118	0.00604706	-3.08621	1.91123	-0.273839	-0.00229464	0.318791	0.000243809	-0.319886	0.0160382	0.0227591	-0.000197111	-1.41432	0.00123794	-1.11721	-0.0103005	-0.323027	-0.00526309	0.403481	0.011198	-0.54011	-0.00367138	-2.74844	1.91028
-2.80566	0.00529126	-4.75907	1.91432	0.0625576	-0.000870387	-1.03654	0.000184448	-0.635728	0.0144997	-0.465325	-0.000646725	-1.28621	0.000473225	-0.858235	-0.0111366	-0.363339	-0.00504562	0.300663	0.0112383	-0.582941	-0.00376565	-2.76609	1.91468
-2.90526	0.00720949	-4.35439	1.91742	-0.152258	0.0107095	-0.785367	-0.000761366	-0.69662	0.00537667	-0.586711	-0.00111285	-1.0339	-0.000230347	-0.491696	-0.0107724	-0.398785	-0.00479117	0.196213	0.0112842	-0.623703	-0.00385514	-2.78348	1.91878
-2.32215	-0.00380862	-3.82373	1.92387	-0.130691	0.0137599	-1.22572	0.000200996	-0.43455	-0.008357	0.058569	-0.00105138	-0.665671	-0.000755362	-0.0742852	-0.00917003	-0.42903	-0.00451647	0.0937137	0.0113375	-0.662209	-0.00393965	-2.8006	1.92256
-1.45396	-0.0442119	0.416352	1.93033	-0.125472	-0.0159256	1.98743	0.000170022	0.0479399	-0.0190356	0.763641	-0.000758528	-0.224389	-0.000993897	0.336075	-0.00645979	-0.453765	-0.00423783	-0.00325967	0.0113889	-0.698274	-0.00401898	-2.81744	1.92599
-0.156929	-0.0124719	0.163954	1.93678	0.334839	0.0144199	1.40897	0.00013153	0.47355	-0.0179499	0.82304	-0.000859773	0.23908	-0.000880225	0.684867	-0.00296024	-0.472673	-0.00396872	-0.0911339	0.0114218	-0.731725	-0.00409294	-2.83397	1.92905
0.0590714	0.000245097	-2.97369	1.94324	0.0272748	0.0161421	-1.4044	0.000293598	0.605056	-0.00750513	0.318571	-0.00102794	0.674568	-0.000514991	0.937651	0.000838878	-0.485429	-0.00371557	-0.166363	0.0114143	-0.762398	-0.00416134	-2.85017	1.93172
0.0784327	0.00233373	-4.73879	1.94916	-0.209473	0.00368432	-2.58006	-0.000282991	0.533444	0.00640352	-0.369993	-0.000214756	1.0363	-4.82861e-05	1.09677	0.00434506	-0.491689	-0.00348183	-0.225532	0.0113401	-0.79015	-0.00422401	-2.86604	1.93398
0.450422	-0.000285681	0.0365923	1.95509	-0.00394158	-0.0102395	2.66441	-0.000897487	0.474239	0.0171375	-0.872279	0.00207126	1.28607	0.000367635	1.17469	0.00693954	-0.49108	-0.00327054	-0.265604	0.0111688	-0.814867	-0.00428077	-2.88156	1.93581
0.548023	-0.00047891	-1.70054	1.96102	-0.0246408	-0.0141641	1.04213	0.000713804	0.48893	0.0205209	-0.97089	0.00413184	1.40339	0.000580549	1.18631	0.00809448	-0.483152	-0.0030848	-0.284611	0.0108683	-0.836501	-0.00433144	-2.8967	1.93721
0.674458	0.00196963	-4.87221	1.96694	0.122638	-0.00804559	-2.30622	0.00698511	0.47474	0.0168412	-0.742553	0.00382368	1.3997	0.000476697	1.14594	0.00753874	-0.467537	-0.00292685	-0.282625	0.0104161	-0.855082	-0.00437586	-2.91145	1.93818

## Sheet: China
FSI.signal	OGAP.signal	CA.signal	CGD.signal	FSI.IMF1	OGAP.IMF1	CA.IMF1	CGD.IMF1	FSI.IMF2	OGAP.IMF2	CA.IMF2	CGD.IMF2	FSI.IMF3	OGAP.IMF3	CA.IMF3	CGD.IMF3	FSI.IMF4	OGAP.IMF4	CA.IMF4	CGD.IMF4	FSI.Residual	OGAP.Residual	CA.Residual	CGD.Residual
1.4763	-0.119683	5.86878	1.16496	0.527602	-0.261678	1.23118	0.00841116	0.126336	-0.350152	1.05571	-0.038973	0.0361074	0.192322	0.252647	-0.0661397	1.30162	0.578267	-1.20686	-0.0403874	-0.515362	-0.0317097	5.88185	1.30205
1.09296	-0.618532	2.93136	1.15224	0.332738	-0.687141	-0.729895	0.010859	-0.0536234	-0.445651	0.464302	-0.0436443	0.0236282	0.20665	0.0847991	-0.0762022	1.30524	0.582561	-1.3534	-0.04204	-0.515015	-0.0315108	5.87053	1.30326
0.10357	0.182694	1.85302	1.13951	-0.491963	-0.215877	-0.612618	0.00751055	-0.212874	-0.0753031	-0.32692	-0.0545403	0.023771	0.181603	-0.0846082	-0.0766296	1.29914	0.561305	-1.51297	-0.0420357	-0.514505	-0.0313184	5.85759	1.30521
0.88782	1.38446	2.56317	1.12679	0.245493	0.626439	0.965217	-0.0170714	-0.168132	0.385821	-0.83295	-0.0563875	0.041223	0.115353	-0.208102	-0.0672284	1.28307	0.517655	-1.67268	-0.0403873	-0.51383	-0.0311332	5.84306	1.30786
0.835075	1.0871	0.867666	1.1889	-0.00959134	0.412114	-0.626455	0.00265987	0.0297016	0.457416	-0.670233	-0.037527	0.0711629	0.0114027	-0.247996	-0.0501099	1.2568	0.456624	-1.81969	-0.0372994	-0.512995	-0.0309555	5.82698	1.31117
1.0123	-0.00988672	1.1107	1.25101	0.0379726	-0.127582	-0.839215	0.00195268	0.163021	0.0823864	-0.0538108	-0.0048317	0.10313	-0.10988	-0.20649	-0.0281698	1.22017	0.383319	-1.94284	-0.0330185	-0.512003	-0.0307861	5.80938	1.31507
0.946064	-0.407708	3.44579	1.31311	0.00901788	0.0803891	1.03246	-0.000795079	0.148135	-0.369752	0.478493	0.0266078	0.126664	-0.197163	-0.104963	-0.00440365	1.17311	0.302825	-2.03695	-0.0277915	-0.510859	-0.0306253	5.7903	1.3195
0.778327	-1.40755	1.59796	1.37522	-0.0279528	-0.84618	-0.732122	0.00937772	0.063933	-0.373823	0.397783	0.0450721	0.136187	-0.199249	0.0288978	0.0182581	1.11573	0.219953	-2.10233	-0.0218653	-0.509568	-0.0304738	5.76979	1.32438
0.597584	0.489642	1.95798	1.39537	-0.0646207	0.593663	-0.0284271	-0.00415363	-0.0112766	0.0558675	0.0428375	0.0480946	0.133239	-0.106727	0.141121	0.0372554	1.04838	0.137876	-2.14034	-0.0154871	-0.508134	-0.0303321	5.74787	1.32966
0.720424	0.783821	1.95535	1.41551	0.215832	0.565079	0.168221	-0.00389187	-0.0854636	0.294567	-0.12389	0.0419685	0.125041	0.0394385	0.173512	0.051071	0.971574	0.0572647	-2.15316	-0.00890298	-0.506559	-0.0302008	5.7246	1.33527
0.17499	0.374619	2.03285	1.43566	-0.179871	0.298851	0.25787	0.0049652	-0.144965	0.0761049	-0.0342087	0.0324529	0.118531	0.17409	0.103554	0.059449	0.886143	-0.0215325	-2.14646	-0.00235365	-0.504847	-0.0300803	5.69999	1.34114
0.294028	-1.03881	1.22142	1.43416	-0.0348031	-0.978613	-0.672518	-0.000766356	-0.0746871	-0.0410352	0.22414	0.0208384	0.113104	0.211367	-0.0289461	0.0629272	0.793412	-0.0982283	-2.13099	0.00393883	-0.502998	-0.0299712	5.6741	1.34722
0.403764	0.842432	2.66401	1.43267	0.0168964	0.85931	0.821096	-0.00115728	0.0911904	0.15674	0.28266	0.00816862	0.101648	0.110188	-0.146577	0.0624039	0.695034	-0.17288	-2.11932	0.00979717	-0.501004	-0.0298741	5.64696	1.35345
0.44277	-0.182078	0.619161	1.43117	0.120057	0.0693596	-0.725831	0.000439462	0.15337	0.150501	-0.193995	-0.00298131	0.0755241	-0.0678489	-0.182066	0.0588309	0.592675	-0.24516	-2.12234	0.015094	-0.498857	-0.0297895	5.61861	1.35979
0.0392153	-0.913309	1.29427	1.42968	-0.00534874	-0.144596	0.163021	0.000789133	0.0227928	-0.159002	-0.503687	-0.0102433	0.0304044	-0.228614	-0.103438	0.0532132	0.487913	-0.314615	-2.14335	0.0197323	-0.496547	-0.0297179	5.58908	1.36619
-0.370784	-1.55211	1.07753	1.42818	-0.0903901	-0.541334	-0.753324	-0.00195243	-0.1389	-0.300551	-0.0136781	-0.0127793	-0.0295702	-0.285712	0.0805935	0.0466689	0.382142	-0.380764	-2.17629	0.0236391	-0.494065	-0.0296599	5.55842	1.37261
-0.429726	-0.298765	3.55922	1.43525	0.0205558	0.477705	0.957987	0.000268138	-0.137877	-0.124807	0.525356	-0.0110092	-0.0976691	-0.188558	0.269921	0.0402151	0.27667	-0.442199	-2.21157	0.026756	-0.491406	-0.029616	5.52666	1.37902
-0.531305	-0.552579	2.24394	1.44231	-0.0782059	-0.0977836	-0.318077	0.000149734	0.0303513	0.0154289	0.329533	-0.00677995	-0.167655	0.0221931	0.35971	0.034521	0.172765	-0.494299	-2.23907	0.0290392	-0.488561	-0.0295868	5.49384	1.38538
-0.446026	0.0873242	1.55373	1.44937	0.0200078	0.311147	-0.543705	-0.000250242	0.181502	0.0214117	-0.194818	-0.00225745	-0.233683	0.261988	0.320919	0.0297486	0.0716711	-0.53167	-2.24986	0.0304638	-0.485524	-0.0295727	5.46	1.39166
-0.293596	-0.577833	2.40277	1.45643	0.353066	-0.782442	0.565384	0.00106711	0.152424	0.271229	-0.432817	0.000674676	-0.291304	0.435678	0.163824	0.0258059	-0.0254933	-0.548916	-2.23718	0.0310292	-0.482289	-0.0295744	5.42517	1.39785
-1.29009	1.25312	1.44948	1.4579	-0.364364	0.839395	-0.573193	-0.000532366	0.00799736	0.382128	-0.177037	0.0012194	-0.336995	0.504154	-0.0817925	0.0225253	-0.117876	-0.540761	-2.1954	0.0307565	-0.478852	-0.0295924	5.38939	1.40393
-1.28089	-0.918294	2.98651	1.45936	-0.170902	-0.81994	0.638372	-0.000355028	-0.0667097	-0.148218	0.196719	0.000342042	-0.36302	0.464703	-0.348039	0.0198123	-0.205045	-0.503805	-2.11977	0.0296877	-0.475208	-0.0296272	5.35271	1.40988
-0.80736	-0.191323	1.80794	1.46083	0.407095	0.250912	-0.743834	0.00011642	-0.102793	-0.448093	0.347338	-0.000605089	-0.353175	0.337594	-0.558542	0.0177511	-0.287128	-0.440403	-2.00559	0.0278773	-0.471359	-0.0296794	5.31515	1.41569
-1.61315	-0.36465	3.39755	1.4623	-0.259156	-0.217806	0.855299	0.000109637	-0.229863	-0.0623174	0.129407	-0.00098324	-0.291954	0.144408	-0.662248	0.0164197	-0.364874	-0.355994	-1.84796	0.0253886	-0.467306	-0.0297494	5.27676	1.42136
-1.31499	0.0631665	2.07145	1.46414	0.130251	-0.108353	-0.362099	-3.71283e-06	-0.364567	0.40076	-0.348162	-0.000818844	-0.178337	-0.116478	-0.655675	0.0157837	-0.439286	-0.256667	-1.64347	0.0222946	-0.463049	-0.0298379	5.23758	1.42689
-1.49355	0.893793	2.12144	1.46599	-0.200072	0.952278	-0.575531	-0.000327726	-0.301159	0.371429	-0.584743	-0.000235064	-0.0223906	-0.440239	-0.565241	0.0156049	-0.511342	-0.148631	-1.39305	0.0186876	-0.458592	-0.0299454	5.19763	1.43226
-0.821227	-1.07114	3.24109	1.46783	0.102307	-0.325282	-0.45619	-0.000388453	-0.0409228	-0.108076	-0.1675	0.000560807	0.153302	-0.771594	-0.43233	0.0155059	-0.581979	-0.0381612	-1.10143	0.0146805	-0.453934	-0.0300724	5.15697	1.43747
-0.446552	-2.23057	5.65976	1.46967	0.0902392	-1.02642	0.668815	0.000873479	0.243947	-0.437677	0.507641	0.000818554	0.320463	-1.01765	-0.296154	0.0150487	-0.652123	0.0684607	-0.775035	0.0104027	-0.449079	-0.0302194	5.11563	1.44253
-0.265465	-0.0827544	6.44705	1.46716	0.0186813	0.904752	0.619196	-0.000336602	0.43266	-0.24763	0.734971	0.000227532	0.449912	-1.09612	-0.191406	0.0138392	-0.722689	0.165323	-0.421589	0.005992	-0.444029	-0.0303871	5.07364	1.44743
-0.454927	-0.224558	6.19947	1.46464	-0.260346	0.249348	0.270873	-0.000378327	0.524767	0.0777505	0.260871	-0.000398426	0.514016	-0.996488	-0.132198	0.0116458	-0.794581	0.24846	-0.0508147	0.00158996	-0.438782	-0.0305759	5.03104	1.45218
-0.102484	-0.652798	5.36448	1.46212	0.239931	-0.700684	-0.430512	-0.000128164	0.462404	0.278216	-0.433703	-0.000276467	0.496854	-0.745355	-0.0839826	0.00842453	-0.868335	0.316213	0.325598	-0.00266286	-0.433338	-0.0307863	4.98787	1.45676
-0.632094	0.835851	5.17145	1.4596	0.181495	0.243461	-0.87021	0.000291275	0.14817	0.409078	-0.763379	0.000443874	0.409085	-0.382108	-0.00321345	0.00431108	-0.943148	0.367417	0.695317	-0.00662774	-0.427696	-0.0310188	4.94418	1.46118
-1.61358	0.845121	7.64678	1.4558	-0.17087	-0.311278	0.852764	1.52262e-05	-0.279237	0.496732	-0.622917	0.000900957	0.275708	0.0650578	0.143964	-0.000376231	-1.01733	0.400911	1.04664	-0.0101776	-0.42185	-0.0312728	4.89999	1.46544
-2.0599	1.97822	7.86333	1.452	-0.162103	0.741811	0.1259	0.000480279	-0.51696	0.0526744	-0.315408	0.000354259	0.123928	0.58255	0.358724	-0.0051695	-1.08897	0.415531	1.36883	-0.0131966	-0.415797	-0.0315475	4.85535	1.46953
-1.85307	0.437841	8.1757	1.4482	0.234756	-0.53678	-0.544597	0.000523666	-0.502339	-0.686782	0.0455759	-0.000675318	-0.0198631	1.07765	0.614784	-0.0095318	-1.15609	0.410003	1.6521	-0.0155843	-0.409534	-0.0318422	4.81028	1.47347
-2.28632	0.725418	9.29781	1.4444	-0.105383	-0.40622	-0.431796	-0.0016906	-0.423315	-0.842114	0.492406	-0.000981584	-0.137919	1.43285	0.878111	-0.0129234	-1.21664	0.382619	1.88708	-0.0172566	-0.403055	-0.032156	4.76484	1.47725
-2.02927	2.04213	11.0788	1.44817	0.189366	0.136183	0.6104	0.00055526	-0.322481	-0.155103	0.772123	-0.000221742	-0.231281	1.58982	1.116	-0.0148899	-1.26852	0.331559	2.0645	-0.0181572	-0.396356	-0.0324882	4.71906	1.48089
-2.23952	3.28869	10.8246	1.45195	-0.16768	0.643263	0.353168	0.000948377	-0.0584633	0.742462	0.461883	5.50085e-05	-0.314405	1.52792	1.29711	-0.0151498	-1.30954	0.256721	2.17507	-0.0182791	-0.389433	-0.032838	4.67297	1.48437
-2.49515	2.66455	10.2004	1.45572	-0.678799	-0.00874761	0.436268	0.000400655	0.298937	1.18548	-0.368796	-0.00107097	-0.395427	1.22828	1.38825	-0.0136392	-1.33758	0.164851	2.20963	-0.0176724	-0.382282	-0.0332046	4.62662	1.4877
-1.53936	2.36709	8.02942	1.4595	0.173414	0.492281	-1.15222	-0.00200338	0.486946	1.0413	-0.845156	-0.00234974	-0.474202	0.699838	1.35621	-0.0105882	-1.35062	0.0645181	2.16225	-0.0164325	-0.374898	-0.0335872	4.58004	1.49087
-0.815431	0.0920287	10.4534	1.4707	1.09256	-0.545716	1.1673	7.68904e-05	0.351867	0.597207	-0.381074	-0.00202862	-0.545805	0.0340619	1.17166	-0.00653748	-1.34677	-0.0356781	2.03728	-0.0146727	-0.36728	-0.033985	4.53327	1.49386
-3.24073	-0.366383	8.92382	1.4819	-0.860614	0.439518	-0.613711	-9.55451e-05	-0.101923	-0.0461427	0.453727	0.000114414	-0.594211	-0.64673	0.852013	-0.00227195	-1.32455	-0.127138	1.84565	-0.0125114	-0.359432	-0.0343972	4.48634	1.49667
-3.72824	-1.61396	8.47243	1.49311	-1.06636	0.599764	-0.794507	-0.000236605	-0.429051	-0.779911	0.937786	0.00277314	-0.59813	-1.21799	0.435667	0.00136084	-1.28334	-0.201262	1.59981	-0.0100676	-0.351365	-0.0348231	4.43931	1.49928
-2.47993	-3.8563	8.72067	1.50431	-0.0484895	-0.640139	0.48791	0.00240187	-0.3246	-1.36709	0.769797	0.00404567	-0.539874	-1.55618	-0.0318629	0.00363411	-1.22387	-0.249451	1.31243	-0.00745153	-0.343096	-0.0352619	4.39219	1.50168
-1.11369	-4.39797	7.7029	1.50541	0.758025	-1.12215	1.11529	-0.000702147	0.0328931	-1.38097	0.0370131	0.00280328	-0.422412	-1.55844	-0.499471	0.00419298	-1.14755	-0.264303	0.996175	-0.00475293	-0.334646	-0.0357127	4.34503	1.50387
-0.955986	-2.44114	3.78838	1.50652	0.332947	-0.271358	-1.08065	-0.000659172	0.347812	-0.596866	-0.792277	0.000159869	-0.25484	-1.22787	-0.912126	0.00320921	-1.05587	-0.244903	0.663708	-0.0020417	-0.326038	-0.0361748	4.29788	1.50585
-1.41243	0.114773	3.06076	1.50762	-0.44475	0.626578	-0.731935	-7.19719e-06	0.347781	0.497477	-1.07067	-0.00186615	-0.0478746	-0.683922	-1.21572	0.00126493	-0.950289	-0.19828	0.32758	0.000622017	-0.317297	-0.0366474	4.25076	1.50761
-0.788813	1.57187	4.85716	1.50872	0.203543	0.73283	1.24139	-0.000379775	-0.030086	1.19441	-0.593312	-0.00232681	0.17847	-0.0697495	-1.37164	-0.000896353	-0.832295	-0.133175	-5.9724e-05	0.00318283	-0.308444	-0.0371297	4.20371	1.50914
-0.762721	2.0322	3.18774	1.51218	0.204327	0.743664	-0.800908	0.000255435	-0.352249	1.03978	0.287178	-0.00150108	0.388061	0.482807	-1.38911	-0.00261927	-0.703358	-0.0583366	-0.308576	0.00559354	-0.299502	-0.0376209	4.15678	1.51045
-1.05819	0.796804	3.49132	1.51564	-0.46223	-0.202837	-0.735555	0.000113022	-0.288146	0.287143	0.912524	-0.000303918	0.547618	0.891442	-1.30404	-0.00352314	-0.56494	0.0174889	-0.58981	0.00781694	-0.290492	-0.0381203	4.11	1.51154
0.37395	0.0654682	4.86468	1.5191	0.317039	-0.499155	0.925039	-1.01148e-05	0.120051	-0.410361	0.926582	0.000437395	0.636772	1.10351	-1.15857	-0.00354531	-0.418477	0.0855535	-0.837863	0.00982243	-0.281436	-0.038627	4.0634	1.5124
0.819701	0.237478	3.70426	1.52256	0.331668	-0.191436	0.604686	0.000305381	0.386871	-0.558982	0.32747	0.000509022	0.638924	1.07813	-0.984105	-0.00286282	-0.265407	0.13794	-1.0484	0.0115836	-0.272356	-0.0391402	4.01703	1.51303
0.34687	0.712077	1.09469	1.52492	-0.0526651	0.160454	-1.09598	-1.49274e-05	0.22525	-0.203008	-0.393057	0.000174079	0.544979	0.822036	-0.792807	-0.00174082	-0.107423	0.170813	-1.2186	0.013075	-0.263271	-0.0396593	3.97093	1.51343
-0.266114	0.688361	2.75609	1.52728	-0.29532	0.10977	0.995727	-0.000177328	-0.144376	0.199957	-0.685585	4.8697e-05	0.374532	0.438153	-0.589809	-0.000454461	0.0532441	0.184197	-1.3469	0.0142695	-0.254194	-0.0401833	3.92512	1.51359
-0.139905	0.264981	1.77517	1.52963	0.145988	-0.0260691	-0.0223016	-0.000128955	-0.411484	0.305852	-0.562151	0.000317623	0.156772	0.0504985	-0.376597	0.000791903	0.213955	0.179028	-1.43249	0.015136	-0.245137	-0.0407115	3.87966	1.51352
-0.543595	-0.159843	1.26455	1.53199	-0.170121	0.0481794	-0.828055	0.000859871	-0.430762	0.129879	-0.226213	0.000440874	-0.0783599	-0.254429	-0.161326	0.00183673	0.37176	0.156855	-1.47445	0.0156464	-0.236111	-0.0412431	3.83457	1.51321
-0.102659	-0.688057	2.77314	1.5309	0.179887	-0.0069644	0.319788	-0.000168538	-0.27594	-0.12605	0.145844	3.22216e-05	-0.30311	-0.442282	0.0373678	0.00259498	0.523639	0.119403	-1.47094	0.0157815	-0.227135	-0.0417774	3.7899	1.51266
-0.202739	-0.921505	2.99008	1.52981	-0.147784	-0.0224421	0.358052	-0.000272039	-0.00783836	-0.250533	0.33092	-0.000368617	-0.495538	-0.496694	0.191939	0.00303064	0.666649	0.068456	-1.41949	0.0155364	-0.218228	-0.0423134	3.74568	1.51189
0.233771	-0.961602	3.06664	1.52872	-0.0480076	-0.186881	0.587277	-6.59203e-05	0.330907	-0.153364	0.215733	-0.000152159	-0.637766	-0.423101	0.264103	0.00312948	0.798055	0.0069141	-1.31846	0.0149229	-0.209416	-0.0428505	3.70195	1.51089
0.775972	-0.209189	1.23062	1.52763	0.193151	0.274903	-1.1039	0.000774299	0.579767	0.0267634	0.175047	0.000307456	-0.71194	-0.265114	0.218603	0.00290092	0.915714	-0.0584857	-1.16912	0.0139699	-0.20072	-0.0433879	3.65874	1.50968
0.643632	-0.264504	3.41517	1.52353	-0.0594625	0.0257169	1.10064	-0.000252462	0.578653	0.0776139	0.325468	0.000376659	-0.701834	-0.0812172	0.0614098	0.00240168	1.01844	-0.119613	-0.978015	0.0127226	-0.192161	-0.0439248	3.61611	1.50828
0.543533	-0.427654	1.94494	1.51942	-0.117532	-0.222439	-0.0169256	-0.00026001	0.340558	0.0301959	0.158968	2.26906e-05	-0.601461	0.0776757	-0.147141	0.00171957	1.10573	-0.168213	-0.756128	0.0112408	-0.183761	-0.0444603	3.57408	1.5067
0.748239	0.00141867	1.02059	1.51531	0.217817	0.13231	-0.38711	1.24967e-05	-0.050142	0.00903215	-0.259487	-0.000171135	-0.420686	0.177452	-0.329699	0.000922365	1.1768	-0.196054	-0.515807	0.00959586	-0.175551	-0.0449937	3.53269	1.50495
0.241884	-0.0769615	0.399986	1.51121	-0.168124	-0.000650205	-0.801709	0.000150731	-0.475669	0.0176264	-0.446578	7.78904e-05	-0.177389	0.198554	-0.408634	4.47078e-05	1.23063	-0.195694	-0.26961	0.00786765	-0.167561	-0.0455242	3.49198	1.50307
0.559586	-0.16247	1.51802	1.50644	0.0577162	-0.0936708	0.0222921	-0.000124249	-0.70984	0.0275916	-0.289176	0.000230239	0.105383	0.139548	-0.334393	-0.000853745	1.26615	-0.164212	-0.0296365	0.00613519	-0.159823	-0.0460511	3.45198	1.50105
0.918785	0.0452647	2.88332	1.50167	-0.0119067	0.137837	0.876935	4.56049e-05	-0.598906	0.0395403	-0.0353241	-0.000103477	0.399663	0.021405	-0.133643	-0.00166857	1.2823	-0.107	0.194134	0.00447289	-0.152366	-0.0465735	3.41275	1.49892
1.50521	-0.253283	2.63307	1.4969	-0.158185	-0.123561	0.140238	7.63741e-05	-0.132249	0.0487853	0.143148	-0.000556066	0.662843	-0.123871	0.131633	-0.00226288	1.27801	-0.0330537	0.393399	0.00294645	-0.145209	-0.0470906	3.3743	1.49669
1.98047	-0.0576681	1.84652	1.49213	-0.447435	0.0828073	-1.09356	-0.000589004	0.469043	0.0741265	0.310296	-0.000760586	0.845035	-0.265203	0.389074	-0.00251401	1.25219	0.0479309	0.560247	0.00160993	-0.138361	-0.0476017	3.33669	1.49438
3.30275	-0.167287	4.2225	1.48987	0.677801	-0.0413204	1.04579	0.000226846	0.656886	0.106112	0.363705	-0.000489333	0.896	-0.38439	0.576273	-0.00237065	1.20389	0.126481	0.686978	0.000501592	-0.131824	-0.0481059	3.29994	1.492
1.2995	-0.081499	2.49814	1.4876	-0.630438	0.0209788	-0.389879	0.000186804	0.136903	0.129984	0.030645	0.00012317	0.78549	-0.473891	0.657073	-0.00189831	1.13313	0.193941	0.76689	-0.000360642	-0.12559	-0.0486026	3.26411	1.48955
1.02541	-0.0995607	2.07624	1.48534	-0.0524317	-0.00789888	-0.366828	-6.27518e-05	-0.398056	0.126661	-0.31519	0.00056239	0.553889	-0.528749	0.629082	-0.00123858	1.04165	0.243191	0.797157	-0.000977897	-0.119646	-0.0490908	3.22921	1.48706
0.671022	-0.120677	2.07527	1.48308	0.0859806	-0.0304708	-0.263744	-4.65592e-05	-0.492891	0.0958266	-0.192019	0.000512895	0.260303	-0.539987	0.504709	-0.000543429	0.93161	0.269295	0.780481	-0.00136903	-0.11398	-0.0495698	3.1953	1.48452
0.33845	-0.0439891	2.7652	1.48074	-0.0187109	0.0430562	0.323146	-1.04362e-05	-0.308605	0.0333307	0.221045	0.000253416	-0.030844	-0.490154	0.323614	9.9002e-05	0.805186	0.270414	0.722903	-0.00156399	-0.108577	-0.0500389	3.16241	1.48196
0.312375	-0.0685655	2.20235	1.4784	0.2093	-0.00396752	-0.0402352	1.97293e-05	-0.199989	-0.0736971	0.349022	-5.17199e-05	-0.258074	-0.350337	0.144905	0.000651489	0.664558	0.248341	0.631493	-0.00159843	-0.103419	-0.0504972	3.13058	1.47938
-0.161867	0.00655488	2.27114	1.47607	0.0325882	-0.0132679	0.755482	-5.3746e-06	-0.216109	-0.217391	-0.0833274	-0.000313497	-0.391922	-0.0895385	0.0124401	0.00110507	0.512066	0.206769	0.51364	-0.00151185	-0.0984906	-0.0509439	3.09984	1.47679
-0.597531	0.182375	-0.0896621	1.47373	-0.26978	0.00475415	-0.967229	-0.000133474	-0.132635	-0.40409	-0.482104	-0.000444838	-0.452142	0.305475	-0.0582409	0.00145574	0.350799	0.149985	0.377126	-0.00134877	-0.0937733	-0.0513783	3.07024	1.4742
-0.00265007	0.359894	1.63004	1.47181	0.234329	0.0248514	0.597391	5.04766e-05	0.139896	-0.681556	-0.150345	-0.000380855	-0.472192	0.804118	-0.067461	0.00167542	0.184572	0.0823574	0.230593	-0.00115414	-0.0892545	-0.0517996	3.04181	1.47162
-0.262645	0.439998	1.865	1.46989	-0.0598133	0.0284149	0.362279	1.31962e-05	0.347748	-1.04025	0.454055	7.50366e-05	-0.483126	1.31176	-0.0440964	0.0017162	0.0174723	0.00825307	0.0835798	-0.000969932	-0.0849257	-0.0522069	3.01458	1.46905
-0.320216	0.423346	1.18786	1.46797	0.055184	0.0248874	-0.319969	-4.87115e-05	0.367423	-1.35266	0.577847	0.000818984	-0.515616	1.68749	-0.0236	0.00151119	-0.146428	-0.06796	-0.0542354	-0.000831925	-0.0807793	-0.0525995	2.98861	1.46652
-0.831272	0.410324	1.4186	1.46605	-0.129349	0.038992	0.60831	0.000383616	0.268175	-1.40731	0.000252267	0.00138192	-0.589637	1.79091	-0.0306356	0.00102946	-0.303652	-0.141887	-0.174146	-0.000768194	-0.076809	-0.0529767	2.96392	1.46402
-0.994455	0.601052	-0.629442	1.462	0.118214	0.168839	-0.65896	-0.000157238	0.117353	-1.02636	-0.656874	0.00104725	-0.705274	1.54164	-0.0733215	0.00034407	-0.451736	-0.209234	-0.269524	-0.000800326	-0.0730112	-0.0533376	2.94055	1.46157
-1.39657	0.695395	-0.0634255	1.45796	0.137429	0.0860708	0.0608217	0.000153017	-0.0225044	-0.204015	-0.684479	-7.52843e-05	-0.853023	0.958423	-0.153577	-0.000346269	-0.589086	-0.266523	-0.33633	-0.000945409	-0.0693834	-0.0536814	2.91854	1.45917
-2.20795	0.592841	0.423124	1.45391	-0.363863	-0.334078	0.121416	0.000291775	-0.0457852	0.986037	-0.13681	-0.00120548	-1.01808	0.135703	-0.265026	-0.000797207	-0.714303	-0.310486	-0.372987	-0.00121368	-0.0659225	-0.0540073	2.89793	1.45684
-1.9344	0.492443	0.753728	1.44987	0.0781533	-1.01403	-0.102506	-0.000612769	0.0478239	2.52627	0.515552	-0.00169282	-1.17176	-0.791013	-0.386868	-0.000794551	-0.825997	-0.337855	-0.379752	-0.00160593	-0.0626252	-0.0543146	2.87876	1.45457
-1.85915	0.392887	1.43012	1.44906	0.368467	-1.84336	0.302721	0.00017073	0.0281753	4.1533	0.838422	-0.0011208	-1.27353	-1.67357	-0.494085	-0.000273089	-0.922777	-0.345363	-0.358256	-0.00211172	-0.0594875	-0.0546025	2.86106	1.45239
-2.87118	0.192546	0.570395	1.44824	-0.277261	-1.97461	-0.327495	-3.45764e-07	-0.243918	4.77488	0.592649	3.43174e-05	-1.2901	-2.3723	-0.56096	0.000622482	-1.00339	-0.32973	-0.311547	-0.00271061	-0.0565048	-0.0548701	2.84487	1.4503
-2.80566	0.189552	0.739418	1.44743	0.0754451	0.129743	0.484269	-0.000182207	-0.564759	3.04928	-0.152229	0.00109081	-1.19528	-2.78835	-0.564611	0.00158962	-1.0674	-0.28763	-0.24407	-0.00337342	-0.0536722	-0.0551167	2.83023	1.44831
-2.90526	0.181913	0.213388	1.44662	-0.123016	4.19498	0.428417	0.000496617	-0.648088	-1.0432	-0.825384	0.00150018	-0.967405	-2.83187	-0.484056	0.00225678	-1.11577	-0.216659	-0.161429	-0.00406402	-0.0509868	-0.0553416	2.81718	1.44643
-2.32215	-12.4325	-1.06457	1.44329	-0.103126	-4.53595	-1.25734	-0.000127324	-0.409561	-5.44016	-0.726122	0.00114965	-0.610783	-2.40748	-0.307696	0.00232104	-1.15024	-0.119802	-0.0701188	-0.00473955	-0.0484462	-0.0555439	2.80576	1.44468
-1.45396	-2.35585	2.74779	1.43995	-0.114149	4.65642	1.23913	-2.52832e-05	0.0503592	-5.62477	0.210992	0.000601156	-0.171469	-1.44327	-0.0633726	0.00165039	-1.17266	-0.00763825	0.0227533	-0.00535131	-0.0460457	-0.0557228	2.796	1.44308
-0.156929	-0.582639	2.13892	1.43662	0.330314	0.45873	-0.349133	4.47562e-05	0.447974	-1.16196	0.795367	0.000454079	0.293455	-0.043314	0.202625	0.000336718	-1.18489	0.107588	0.109849	-0.00584868	-0.0437787	-0.0558775	2.78794	1.44163
0.0590714	1.09416	2.1408	1.43328	0.0180878	-4.66693	-0.473021	7.25e-05	0.543942	4.05423	0.564841	0.00038418	0.727491	1.44343	0.443092	-0.00134977	-1.18881	0.213633	0.183758	-0.00618348	-0.0416374	-0.0560073	2.78162	1.44036
0.0784327	13.4819	2.71953	1.42995	-0.208534	4.71044	0.478476	0.000310569	0.432253	5.81528	-0.0786344	-0.000305483	1.08061	2.61398	0.618971	-0.00302378	-1.18629	0.298253	0.237043	-0.00631116	-0.0396142	-0.0561114	2.77707	1.43928
0.450422	3.18739	1.44113	1.42661	0.00517131	-4.04448	-0.465144	0.000461093	0.349004	3.72266	-0.565018	-0.00179922	1.31314	3.12095	0.704481	-0.00425468	-1.17919	0.349203	0.262353	-0.00619155	-0.0377016	-0.0561889	2.77434	1.4384
0.548023	0.208794	1.86025	1.42328	-0.0162809	-3.99626	0.0385402	-0.000841006	0.362293	0.967116	-0.666242	-0.00314537	1.40726	2.84562	0.690052	-0.00466737	-1.16936	0.35716	0.253898	-0.00579342	-0.0358923	-0.0562392	2.77347	1.43773
0.674458	-0.557566	1.94971	1.41994	0.122795	-3.41279	0.000410727	-0.00490676	0.362295	0.732418	-0.427427	-0.00319732	1.38169	1.76588	0.583861	-0.00410612	-1.15814	0.324528	0.211161	-0.00510813	-0.034184	-0.0562613	2.77448	1.43726

## Sheet: India
FSI.signal	OGAP.signal	CA.signal	CGD.signal	FSI.IMF1	OGAP.IMF1	CA.IMF1	CGD.IMF1	FSI.IMF2	OGAP.IMF2	CA.IMF2	CGD.IMF2	FSI.IMF3	OGAP.IMF3	CA.IMF3	CGD.IMF3	FSI.IMF4	OGAP.IMF4	CA.IMF4	CGD.IMF4	FSI.Residual	OGAP.Residual	CA.Residual	CGD.Residual
2.2455	0.13828	-2.79986	1.73942	0.265649	0.0478352	-0.52754	0.0069603	0.0775562	-0.0790112	-0.569186	0.00254301	-0.240723	-0.0565421	-0.227011	-0.0162644	0.94844	0.451356	-0.983593	-0.00822407	0.385551	-0.342706	-1.16478	1.7544
1.8333	-0.164475	-1.75592	1.73226	-0.000896588	-0.195452	0.0347702	0.00234345	0.00336	-0.155802	-0.267092	0.00261799	-0.265301	-0.0644755	-0.0802567	-0.0188181	0.960514	0.470443	-1.02143	-0.00881668	0.383649	-0.336215	-1.16517	1.75494
1.50921	0.356032	-0.929642	1.72511	-0.137808	0.310201	0.270599	0.000238686	-0.115912	-0.18118	0.132698	-0.00111715	-0.263028	-0.0330593	0.0656775	-0.0203088	0.955915	0.46831	-1.05431	-0.00905151	0.381473	-0.328813	-1.16591	1.75535
1.65157	-0.131576	-1.02826	1.71796	0.101796	-0.30534	-0.25506	-0.00378371	-0.154308	-0.105434	0.399228	-0.00451639	-0.227431	0.0285001	0.172078	-0.0204862	0.933096	0.443215	-1.08454	-0.008891	0.379026	-0.320579	-1.16698	1.75564
1.33315	0.198018	-0.301557	1.72473	-0.270362	-0.18311	0.320872	0.000655659	-0.0489386	0.0672167	0.459037	-0.00418711	-0.160405	0.0917191	0.201907	-0.0191989	0.89132	0.394802	-1.11369	-0.00833186	0.376309	-0.311537	-1.16839	1.75579
1.63381	1.17185	-0.963408	1.7315	-0.0550698	0.677179	-0.312216	0.000815421	0.0947229	0.192397	0.426964	-0.00111084	-0.0767037	0.127614	0.137587	-0.0166022	0.830647	0.323921	-1.14115	-0.00741303	0.373325	-0.301711	-1.17012	1.75581
2.08054	-0.149952	-0.696877	1.73827	0.433546	-0.573811	0.122639	-1.62826e-05	0.133025	0.193231	0.316004	0.00184251	0.00706222	0.120541	0.00208546	-0.0130514	0.751676	0.233318	-1.16155	-0.00619317	0.370077	-0.291125	-1.17217	1.75569
1.32289	0.268954	-0.858118	1.74504	-0.0913189	-0.040069	0.302617	0.000487435	0.0107435	0.20682	0.0317921	0.00284257	0.0803699	0.0695394	-0.148703	-0.00897508	0.655697	0.127933	-1.1682	-0.00473598	0.366566	-0.279802	-1.17454	1.75542
0.707203	0.728682	-1.90196	1.74867	-0.446833	0.65967	-0.409711	-0.000349646	-0.109804	0.119512	-0.310711	0.00188859	0.141713	0.00141617	-0.251523	-0.00476067	0.544617	0.0142166	-1.15513	-0.00310686	0.362797	-0.267768	-1.17721	1.755
0.906102	-1.22855	-1.39731	1.75231	-0.115643	-0.847339	0.0122324	-0.000218843	-0.0781264	-0.193362	-0.368334	0.000106503	0.192828	-0.0504027	-0.247491	-0.000638148	0.420673	-0.100866	-1.11826	-0.00137259	0.35877	-0.255045	-1.18018	1.75443
1.3265	-0.0334455	-1.13372	1.75594	0.397608	0.759718	-0.302006	-2.48745e-05	0.00957487	-0.504325	-0.0846759	-0.00144646	0.238167	-0.0710811	-0.115309	0.00331125	0.286373	-0.210404	-1.05277	0.000399476	0.354489	-0.241658	-1.18345	1.75371
0.931468	-1.32275	0.61528	1.76013	0.193194	-0.446466	0.776392	0.000227654	0.0106379	-0.529265	0.185264	-0.00211348	0.279417	-0.0595768	0.0937836	0.00705509	0.144688	-0.308225	-0.953172	0.00214334	0.349956	-0.22763	-1.18701	1.75282
0.126116	-0.834033	-0.526684	1.76432	-0.353668	-0.315239	-0.928226	-9.39055e-05	-0.0385886	-0.145959	0.309075	-0.0016543	0.305631	-0.0306079	0.307671	0.0105028	-0.000687872	-0.389293	-0.814091	0.00379554	0.345174	-0.212986	-1.19084	1.75177
0.278918	0.690193	1.68231	1.7685	0.025604	0.628926	1.00042	-0.000746756	-0.0254761	0.447616	0.187042	-1.31068e-05	0.299099	-0.00765992	0.447945	0.0134196	-0.145583	-0.449444	-0.630254	0.00529529	0.340144	-0.19775	-1.19496	1.75055
0.3453	-0.176614	-0.389963	1.77269	0.26451	-0.575311	-0.951334	-0.000706811	0.0791424	0.80064	-0.220683	0.00217919	0.247381	-0.00740659	0.434236	0.015472	-0.285597	-0.485637	-0.398485	0.00658433	0.33487	-0.181945	-1.19934	1.74916
-0.4366	0.854503	0.584229	1.77687	-0.319161	0.609356	-0.00695482	0.00200344	0.192553	0.668508	-0.307957	0.00328575	0.148341	-0.0345328	0.22035	0.0163708	-0.41633	-0.49633	-0.126033	0.00760988	0.329353	-0.165602	-1.20398	1.7476
-0.205183	-0.667499	0.909824	1.77203	0.274321	-0.345529	-0.100243	-0.000485456	0.162189	0.113837	0.147133	0.00227416	0.0113668	-0.0743499	-0.154816	0.0160294	-0.533534	-0.481249	0.166541	0.00833056	0.323597	-0.14877	-1.20888	1.74588
-0.935498	-0.889586	1.63015	1.76719	0.0745469	0.0481829	0.235818	-0.000417488	-0.0462978	-0.525912	0.573644	0.000199732	-0.138804	-0.0984884	-0.513858	0.0146806	-0.63304	-0.441409	0.450606	0.00872305	0.317604	-0.131519	-1.21403	1.74401
-1.79272	-0.963884	2.08511	1.76235	-0.283397	0.266914	0.703898	7.35881e-05	-0.268567	-0.907014	0.461841	-0.00123706	-0.271731	-0.0766618	-0.680284	0.0127561	-0.71069	-0.379466	0.698135	0.00878313	0.311376	-0.113938	-1.21943	1.74198
-1.83801	-1.52791	1.2982	1.75751	-0.144163	-0.629526	0.341878	-8.26396e-05	-0.255789	-0.738986	-0.225468	-0.00144521	-0.35769	0.00704526	-0.611576	0.0107208	-0.762341	-0.299242	0.890928	0.00851842	0.304916	-0.0961192	-1.22506	1.7398
-1.64396	0.59299	-0.0571028	1.75349	-0.146009	0.541754	-0.720295	3.28533e-05	0.0326203	0.00624192	-0.900401	-0.000910799	-0.376343	0.120137	-0.338292	0.00893373	-0.784049	-0.204659	1.0167	0.00794416	0.298226	-0.0781559	-1.23092	1.73749
-1.23162	0.822186	0.335888	1.74946	-0.0309398	-0.132926	-0.762066	-3.52744e-05	0.312401	0.725945	-0.896434	-0.000178541	-0.325536	0.206156	0.0821741	0.00754383	-0.773472	-0.0995768	1.0639	0.00708619	0.291309	-0.0601444	-1.23701	1.73505
-0.592084	0.869171	3.05451	1.74544	0.538505	-0.241784	0.857329	-3.22182e-05	0.257886	0.77542	-0.135542	0.000501289	-0.206737	0.211729	0.521409	0.00649634	-0.732375	0.0116897	1.02036	0.00598447	0.284167	-0.0421812	-1.24331	1.73249
-1.82312	1.47073	3.00315	1.74141	-0.525655	1.03704	-0.17136	0.00048705	-0.121147	0.0921995	0.778403	0.000795729	-0.035621	0.120181	0.809648	0.00561823	-0.66454	0.123111	0.872829	0.00468943	0.276802	-0.0243631	-1.24982	1.72982
-1.13349	-1.49424	2.61034	1.73544	0.0908464	-1.20108	-0.400465	-0.000123937	-0.310751	-0.569196	0.995494	0.000552122	0.15508	-0.0328738	0.780789	0.0046907	-0.573955	0.22796	0.61708	0.00325776	0.269218	-0.00678694	-1.25655	1.72706
-0.441332	0.476402	2.73539	1.72946	0.31489	0.724712	1.32135	-0.000216805	-0.114698	-0.429831	0.24852	0.000178223	0.328371	-0.199108	0.377683	0.00353896	-0.464577	0.320173	0.284306	0.00174799	0.261417	0.0104506	-1.26347	1.72421
-0.539857	0.456956	-1.63582	1.72349	-0.400845	0.3629	-1.0982	-0.000137117	0.275541	-0.00722328	-0.645302	5.80547e-05	0.434059	-0.329761	-0.18687	0.00206012	-0.340358	0.394219	-0.0785142	0.000213963	0.2534	0.0272528	-1.27058	1.72129
0.478834	-0.0382825	-2.72426	1.71751	0.489295	-0.25824	-1.19169	8.26526e-05	0.276114	0.155444	-0.697838	0.000169146	0.422518	-0.39099	-0.639361	0.000252303	-0.205292	0.445353	-0.42254	-0.00129812	0.245173	0.0435229	-1.27788	1.71831
-0.82796	-0.253117	-0.157865	1.71088	-0.488399	-0.505148	1.18654	1.81321e-05	-0.0575597	0.184152	0.0578835	0.000137573	0.274368	-0.38373	-0.770347	-0.00179107	-0.0641261	0.471043	-0.698965	-0.00274948	0.236742	0.059164	-1.28536	1.71527
-0.362247	1.13896	-1.78048	1.70425	0.17258	0.894166	-0.58024	0.000176023	-0.165441	0.151959	0.336403	-9.83513e-05	0.0286522	-0.326917	-0.564284	-0.00390201	0.0758243	0.471317	-0.866103	-0.00410861	0.228115	0.0740794	-1.29301	1.71218
-0.206608	-0.654535	-1.30257	1.69762	0.334621	-0.7964	0.180004	0.000111779	-0.0534267	0.0135235	-0.15883	-0.000351269	-0.244764	-0.232846	-0.11955	-0.00586035	0.205902	0.446453	-0.912699	-0.00534941	0.219301	0.0881724	-1.30083	1.70907
-0.733511	0.469545	-1.86194	1.69099	-0.20923	0.403474	-0.612116	-0.000785433	0.023848	-0.108637	-0.145207	-0.000307429	-0.447633	-0.103086	0.227372	-0.00740085	0.317264	0.397108	-0.844597	-0.00645107	0.210307	0.101346	-1.30881	1.70593
-0.56831	0.440589	-0.22399	1.68727	0.0390483	0.373242	0.632682	0.000121397	-0.124126	-0.173947	0.165656	-1.48378e-05	-0.504248	0.0685242	0.341151	-0.00822738	0.401617	0.325218	-0.671533	-0.007401	0.201142	0.113504	-1.31694	1.70279
-0.585302	-0.629531	-1.2946	1.68355	0.124897	-0.805114	-0.292845	0.000355692	-0.411821	-0.161502	0.0418811	-0.000224168	-0.414773	0.28537	0.272075	-0.00803639	0.454145	0.235122	-0.412851	-0.00819529	0.191815	0.124549	-1.32522	1.69965
-0.892804	1.24146	-1.54585	1.67982	-0.217253	0.877143	-0.323893	0.000308507	-0.645829	-0.0864449	-0.166905	-0.0015529	-0.216394	0.528432	0.1774	-0.00661018	0.476156	0.133265	-0.115137	-0.00883614	0.182332	0.134384	-1.33365	1.69651
-0.344	-0.340566	-1.11229	1.6761	0.00229811	-0.739943	-0.0764476	-0.000442441	-0.622734	-0.144745	-0.066719	-0.00354563	0.0421552	0.750839	0.192902	-0.00399241	0.470379	0.027055	0.170317	-0.00932384	0.172704	0.142914	-1.34221	1.69341
-0.039704	0.755774	-0.285728	1.67629	-0.384375	0.407697	0.410598	0.000946648	-0.220062	-0.187285	0.164078	-0.00476126	0.303066	0.862309	0.277324	-0.000576483	0.439634	-0.0762917	0.407269	-0.00965328	0.162936	0.15004	-1.35089	1.69033
1.47374	0.500747	-1.03402	1.67647	0.273388	0.130254	-0.39738	-0.000834911	0.426612	0.023576	0.206313	-0.00309599	0.502467	0.778243	0.325341	0.0029149	0.387023	-0.170997	0.584297	-0.00981264	0.153039	0.155666	-1.35971	1.6873
1.94145	-0.203733	-0.615789	1.67666	0.241261	-0.712567	0.365956	-0.00566973	0.859275	0.538467	-0.0109914	0.0021735	0.575321	0.483611	0.27893	0.0056142	0.315918	-0.251712	0.703516	-0.00978534	0.143019	0.159707	-1.36863	1.68433
1.97724	1.40149	-0.843196	1.69333	0.635212	0.924187	0.549424	0.00709479	0.615745	0.996813	-0.188137	0.00760364	0.478453	0.0462661	0.165276	0.00677374	0.230529	-0.312773	0.775481	-0.00955583	0.132886	0.162118	-1.37767	1.68142
-0.20104	-1.34626	-2.86546	1.68268	-0.564511	-1.14469	-1.27635	-0.000396648	-0.116699	0.812713	-0.108864	0.0076702	0.257104	-0.432363	0.0350167	0.00593881	0.137052	-0.348416	0.812077	-0.00911074	0.122647	0.162877	-1.38681	1.67858
-0.934464	-0.886728	-0.164511	1.67203	-0.420486	0.439582	1.57119	-0.000826382	-0.689905	0.0648407	0.00348263	0.00211026	-0.0209505	-0.836503	-0.0659216	0.00335438	0.0421637	-0.352637	0.825242	-0.00843803	0.11231	0.161957	-1.39605	1.67583
-0.905449	-1.04169	-2.82719	1.66138	-0.0267999	1.27551	-0.763135	0.000248857	-0.764443	-0.796256	-0.115265	-0.00442345	-0.289034	-1.04393	-0.116531	-0.000100281	-0.0474577	-0.318306	0.82596	-0.00752413	0.101884	0.159336	-1.40538	1.67318
-0.703492	-1.77432	-4.1386	1.65073	0.0783611	0.834516	-1.81211	-0.00288998	-0.453435	-1.33195	-0.177713	-0.00729469	-0.490902	-0.930433	-0.162632	-0.00336764	-0.125139	-0.241065	0.820012	-0.00635476	0.0913767	0.154989	-1.41479	1.67064
-0.535582	-3.73162	-1.51089	1.6532	-0.0230591	-2.57279	0.787826	0.000920249	-0.0834618	-0.544715	0.0828104	-0.00550969	-0.594472	-0.436855	-0.246063	-0.00550854	-0.184253	-0.133072	0.806381	-0.00491461	0.0807965	0.148892	-1.42428	1.66822
-0.113323	3.927	-0.783579	1.65567	0.239651	2.51507	1.49444	0.000909888	0.0350522	1.1782	0.356057	-0.00187636	-0.57592	0.222308	-0.346306	-0.00608838	-0.21961	-0.0113013	0.776883	-0.00319349	0.0701515	0.141019	-1.43384	1.66592
-0.473625	0.686866	-2.31013	1.65815	-0.161494	-1.45214	0.286461	0.000122556	-0.113505	1.15928	0.282201	0.00064271	-0.427391	0.779414	-0.425815	-0.00518333	-0.231692	0.10711	0.721046	-0.00120674	0.0594499	0.131347	-1.44347	1.66377
-0.0981824	0.271132	-3.43336	1.66062	0.0755111	-1.0552	-0.258453	-0.000277027	-0.259107	-0.100115	-0.0915747	0.00130413	-0.198737	1.05633	-0.443329	-0.00316683	-0.223972	0.205025	0.629446	0.00098799	0.0486998	0.119851	-1.45316	1.66177
0.216684	0.758285	-4.34633	1.6637	0.0204606	0.137424	-0.715445	-3.45252e-05	-0.20156	-0.882213	-0.421548	0.00110545	0.0479678	1.0003	-0.355419	-0.000602866	-0.200608	0.266519	0.496549	0.00330452	0.0379094	0.106507	-1.4629	1.65993
0.403205	0.577003	-3.27144	1.66678	-0.334795	-0.132091	0.398888	-0.000145934	0.0472434	-0.494688	-0.443593	0.00108618	0.269226	0.615713	-0.133984	0.00194277	-0.165914	0.28353	0.323937	0.00564682	0.0270869	0.0912899	-1.47269	1.65825
1.44225	1.14927	-3.80461	1.66987	0.230487	0.255588	-0.612373	-0.00019354	0.281175	0.215154	-0.0371063	0.00133725	0.435529	0.0495332	0.193756	0.00405283	-0.124232	0.261255	0.118886	0.00791577	0.0162405	0.074176	-1.48251	1.65675
1.88268	0.535226	-2.27183	1.67295	0.462497	-0.0915455	0.357064	0.000781905	0.331061	0.494095	0.451734	0.00123985	0.522948	-0.498896	0.529673	0.00547877	-0.0799064	0.208047	-0.106918	0.010012	0.00537826	0.0551406	-1.49237	1.65544
0.794153	0.0664798	-2.12931	1.67269	-0.529406	0.121158	0.433608	-0.000167613	0.167256	0.233378	0.538924	0.000596841	0.525483	-0.889893	0.762757	0.00611717	-0.0371018	0.131992	-0.341414	0.0118399	-0.00549153	0.0341594	-1.50226	1.65431
1.5863	-0.53155	-3.72185	1.67244	0.483771	0.23464	-0.573035	-0.000335444	-0.0472278	-0.223268	0.143405	9.58318e-05	0.463689	-1.08878	0.808886	0.00598587	0.00113568	0.0408949	-0.574261	0.013317	-0.0163607	0.0112078	-1.51217	1.65338
0.471124	-1.72839	-3.70876	1.67219	-0.3975	-0.706966	0.291084	-0.000206245	-0.22547	-0.385234	-0.347596	0.000164941	0.363311	-1.10628	0.652934	0.00519435	0.0335695	-0.0571765	-0.791154	0.0143836	-0.0272211	-0.0137385	-1.52209	1.65265
1.01034	-0.0805503	-4.21258	1.67193	0.206876	0.609402	0.362537	0.000412877	-0.20665	-0.0908436	-0.41771	0.000462168	0.245673	-0.981071	0.300208	0.00391968	0.059556	-0.153152	-0.973217	0.0150063	-0.0380646	-0.0407039	-1.53202	1.65213
0.788235	-0.317279	-5.48291	1.6697	-0.170854	0.0134016	-0.793803	-0.000149507	0.0491749	0.159751	0.0450596	0.000462269	0.123359	-0.780505	-0.19588	0.00238618	0.0785112	-0.236827	-1.10066	0.0151757	-0.048883	-0.06971	-1.54195	1.65182
1.17904	-0.532569	-4.04722	1.66746	0.154737	-0.330827	0.607242	-5.77665e-05	0.213737	0.16878	0.539896	6.11892e-05	0.0139201	-0.57364	-0.667281	0.000833334	0.0898582	-0.297883	-1.15354	0.0149016	-0.059668	-0.100758	-1.55188	1.65173
1.00202	0.107261	-4.3356	1.66523	0.164908	0.311644	0.60804	7.64866e-05	0.110157	0.0721151	0.396405	-0.000400651	-0.0672781	-0.405646	-0.936166	-0.000483765	0.0930314	-0.326655	-1.11102	0.0142061	-0.0704116	-0.13378	-1.56179	1.65183
0.26793	-0.499437	-6.33129	1.663	-0.283184	-0.255758	-0.886978	-0.000320616	-0.11199	-0.0303511	-0.342021	-0.000579415	-0.115854	-0.287627	-0.947938	-0.00135643	0.0875816	-0.315689	-0.957201	0.0131186	-0.0811056	-0.168595	-1.57169	1.65214
0.434466	-0.0901361	-4.45438	1.6624	-0.0275865	0.164801	0.876123	0.00015132	-0.157091	-0.08934	-0.862275	-0.000371327	-0.131747	-0.206253	-0.678001	-0.00167647	0.0736259	-0.263166	-0.702057	0.0116742	-0.0917417	-0.204993	-1.58157	1.65262
0.559633	-0.28997	-4.84673	1.66181	-0.0308864	-0.107719	-1.01837	0.000141861	-0.00203292	-0.0667065	-0.323775	-9.36269e-05	-0.118605	-0.142098	-0.162816	-0.00144645	0.0524007	-0.172847	-0.374112	0.00991424	-0.102312	-0.242767	-1.59141	1.65329
0.920059	-0.099213	-0.781189	1.66121	0.232274	-0.0665208	1.02617	5.79435e-05	0.114243	0.0242906	0.626647	-6.88907e-05	-0.0886051	-0.0848269	0.408444	-0.000787472	0.0264265	-0.0516441	-0.00509032	0.00788472	-0.112808	-0.281708	-1.60122	1.65413
0.721131	0.493509	-0.405773	1.66062	0.112612	0.440467	0.270867	4.04406e-05	0.0570962	0.05338	0.836964	-0.000247492	-0.0555349	-0.0385183	0.812142	7.19908e-05	-0.00106104	0.0907637	0.373282	0.00563307	-0.123221	-0.321607	-1.61099	1.65512
0.210826	-0.555655	-0.859107	1.66004	-0.250563	-0.613008	-0.183276	-3.24081e-05	-0.0587154	0.021055	0.267594	-0.00024295	-0.0286886	-0.0123543	0.881654	0.000850735	-0.0267171	0.241744	0.72931	0.00320622	-0.133544	-0.362256	-1.62071	1.65626
0.362343	0.568813	-1.61851	1.65947	-0.0474799	0.46344	-0.502962	-0.000270696	-0.0657668	0.0635035	-0.395347	0.000287808	-0.0149592	-0.00558614	0.651784	0.00126172	-0.0475106	0.385738	1.03323	0.000646642	-0.143769	-0.403447	-1.63037	1.65754
0.65045	0.100639	-1.9342	1.6589	0.222467	0.0402558	-0.593557	-0.000223341	0.0140734	0.0393548	-0.574659	0.00107353	-0.0206236	-0.000158412	0.223691	0.00109705	-0.0610064	0.505802	1.26355	-0.00200789	-0.153886	-0.444971	-1.63997	1.65896
0.24561	-0.193006	-1.10704	1.65832	-0.150486	-0.163493	0.132553	0.000934367	0.0622629	-0.0248794	-0.270375	0.00132128	-0.0481509	0.0385869	-0.27413	0.00030313	-0.0658862	0.585574	1.4051	-0.00472548	-0.163889	-0.48662	-1.6495	1.66049
0.397073	-0.041393	-0.648683	1.65426	0.115842	-0.070841	0.481393	0.00015148	0.0457972	0.0317841	0.0147938	0.000448607	-0.0973566	0.153608	-0.641646	-0.000992529	-0.0623057	0.611908	1.44459	-0.00747783	-0.173768	-0.528186	-1.65895	1.66213
0.130165	0.421136	-1.1821	1.6502	-0.0306464	0.248897	0.0268759	3.13031e-05	0.0393628	0.118231	-0.0696643	-0.000962549	-0.16452	0.374007	-0.712258	-0.00251328	-0.0514357	0.579931	1.37052	-0.0102285	-0.183516	-0.569459	-1.66833	1.66387
-0.0830034	0.135184	-1.53259	1.64614	-0.158487	-0.176171	-0.28328	-0.000984544	0.0734208	0.136245	-0.278764	-0.00168823	-0.238121	0.704854	-0.503883	-0.00396411	-0.0349112	0.494216	1.18358	-0.0129278	-0.193124	-0.610231	-1.67762	1.6657
0.213239	0.336044	-0.994179	1.64598	0.248949	-0.201781	-0.0139716	0.000205148	0.0674778	0.178205	-0.236009	-0.00117642	-0.297191	1.13442	-0.146658	-0.00515149	-0.0145319	0.364196	0.908787	-0.0155081	-0.202584	-0.650294	-1.68681	1.66761
-0.463485	1.22582	-0.565754	1.64582	-0.222113	0.495976	-0.0613597	0.000268256	-0.0663875	0.141456	0.06629	-7.86614e-05	-0.32096	1.63255	0.218606	-0.00607459	0.00784906	0.199948	0.577026	-0.0178801	-0.211889	-0.68944	-1.69591	1.66958
-0.414313	0.129735	0.0322583	1.64566	0.00676231	-0.490826	0.247634	3.9751e-05	-0.219335	-0.198	0.311575	0.000849453	-0.296432	2.14549	0.484736	-0.00690511	0.0304107	0.011419	0.218995	-0.0199411	-0.221029	-0.72746	-1.7049	1.67162
-0.294495	0.670724	-0.437786	1.6455	0.16276	0.449216	-0.0453118	-0.00012034	-0.27849	-0.785673	0.262125	0.00142508	-0.217748	2.61955	0.582762	-0.00791093	0.0515734	-0.191592	-0.137451	-0.0215907	-0.229997	-0.764146	-1.71377	1.6737
-0.399773	-0.222443	-1.1221	1.64535	-0.0967599	-0.0176194	-0.202286	-0.000157993	-0.189054	-1.36195	-0.0158559	0.00172363	-0.092109	3.04681	0.544629	-0.00930589	0.0702232	-0.399221	-0.47409	-0.022735	-0.238785	-0.799288	-1.72253	1.67582
-0.207332	-0.748885	-1.03876	1.64519	-0.229577	-0.462157	0.408364	5.71167e-05	0.055181	-1.58428	-0.258043	0.00157957	0.055348	3.44489	0.447139	-0.0111327	0.0854642	-0.600868	-0.781308	-0.0232865	-0.247384	-0.832679	-1.73116	1.67797
0.548158	0.549977	-2.23023	1.64503	0.208901	0.515571	-0.620906	0.000464079	0.305477	-1.41288	-0.16864	0.00081232	0.194542	3.81994	0.352608	-0.0132158	0.0964129	-0.784806	-1.05165	-0.0231683	-0.255786	-0.864111	-1.73966	1.68014
0.501003	0.181001	-0.903988	1.64487	0.125993	-0.193477	0.613076	0.000267948	0.31635	-1.18265	0.145677	-0.00019079	0.298407	4.1097	0.249407	-0.0151986	0.102095	-0.938895	-1.27698	-0.0223167	-0.263984	-0.893397	-1.74802	1.68231
-0.0560685	0.45371	-1.74406	1.64471	-0.16942	-0.141066	-0.0701091	-0.00179773	0.0838263	-0.879941	0.203861	-0.000667098	0.355224	4.15019	0.107114	-0.0166076	0.101412	-1.05248	-1.44895	-0.0206878	-0.271968	-0.92044	-1.75624	1.68447
-0.271504	0.764035	-2.48395	1.65103	-0.0574295	0.0821638	-0.382595	0.000277692	-0.166638	-0.3243	-0.00202567	-0.000691665	0.37128	3.74283	-0.0954109	-0.016904	0.0934486	-1.12178	-1.55938	-0.0182672	-0.27973	-0.945192	-1.7643	1.68661
-0.480736	-0.0323974	-2.1556	1.65735	-0.0515245	-0.730688	0.337741	0.00115571	-0.267354	0.678658	-0.19808	-0.00184976	0.355952	2.75574	-0.333593	-0.0155909	0.0782877	-1.14733	-1.60052	-0.0150888	-0.287263	-0.967614	-1.77221	1.68872
-0.229413	0.0956222	-2.73358	1.66366	0.280329	-0.997628	-0.207922	0.00106942	-0.204889	2.53187	-0.118758	-0.00453096	0.316115	1.23635	-0.556074	-0.0123981	0.0570034	-1.1294	-1.56512	-0.0112518	-0.294559	-0.987665	-1.77995	1.69077
-0.865455	0.208213	-2.23668	1.66998	-0.413745	-1.61752	-0.07238	-0.00228208	0.0209443	4.95307	0.184099	-0.00618313	0.253088	-0.572858	-0.681839	-0.00741034	0.0310936	-1.06725	-1.44849	-0.006909	-0.301609	-1.00531	-1.78753	1.69276
-0.0192479	-0.211924	-1.36975	1.68793	0.453383	-1.79097	0.342727	0.000593863	0.186509	6.34039	0.320411	-0.00398405	0.170376	-2.38548	-0.617546	-0.00111785	0.00222924	-0.959911	-1.25717	-0.00223488	-0.308404	-1.0205	-1.79493	1.69467
-1.0265	0.22481	-1.97258	1.70588	-0.237522	1.20565	-0.46878	-0.000447382	0.0689582	5.10897	-0.0727008	0.0016552	0.0716649	-3.94944	-0.317909	0.00559247	-0.0278467	-0.806428	-1.00729	0.0025913	-0.314937	-1.0332	-1.80214	1.69649
-1.46439	-0.659423	-0.903575	1.72384	-0.297664	5.56646	0.47011	-0.000982145	-0.101587	0.662479	-0.702121	0.00753748	-0.0418772	-5.03913	0.106553	0.0116878	-0.0573548	-0.605838	-0.716935	0.00738985	-0.3212	-1.04337	-1.80917	1.6982
-1.24716	-1.07077	-0.00190049	1.74179	0.127991	11.5107	0.692766	0.00415489	-0.100492	-5.64038	-0.766684	0.00968249	-0.166909	-5.43726	0.500181	0.0161766	-0.0844944	-0.35731	-0.404252	0.0119815	-0.327185	-1.05098	-1.816	1.69979
-1.32876	-1.13667	-0.582426	1.74088	0.115275	13.6314	-1.40059	-0.0013832	0.0246053	-8.73498	0.139596	0.00641589	-0.288316	-4.92316	0.75996	0.0184103	-0.10746	-0.0644591	-0.087384	0.0161906	-0.332882	-1.05597	-1.82263	1.70125
-1.59551	-23.8197	3.87765	1.73997	-0.0772838	-16.1458	1.64462	-0.00145136	0.10217	-3.60404	1.17304	0.000595187	-0.382151	-3.38054	0.815752	0.0184228	-0.124453	0.253196	0.215633	0.0198541	-0.338285	-1.05832	-1.82905	1.70255
-1.53821	21.2433	2.49421	1.73907	0.146235	15.9218	0.151673	-0.000249375	0.0249988	6.75948	1.18605	-0.00395209	-0.43067	-1.1704	0.623898	0.0167484	-0.133668	0.572196	0.488571	0.0228243	-0.343385	-1.05798	-1.83525	1.7037
-1.92826	4.94904	0.118281	1.73816	-0.0696685	-6.3813	-1.28074	0.000346204	-0.128374	9.97483	0.38644	-0.0060017	-0.430731	1.22596	0.238897	0.0141794	-0.133465	0.86908	0.721338	0.024975	-0.348173	-1.05492	-1.84124	1.70466
-2.04698	-0.0291265	-1.6893	1.73725	-0.18046	-9.51992	-1.76595	0.000356315	-0.181555	5.64664	-0.662956	-0.00631826	-0.385467	3.36767	-0.221601	0.0115532	-0.123234	1.12039	0.907561	0.0262268	-0.352642	-1.04908	-1.847	1.70544
-1.7895	-8.95942	0.897674	1.73635	-0.167814	-11.8812	1.86388	0.000187073	-0.0346544	-2.80146	-1.4261	-0.00596279	-0.307065	4.97568	-0.629602	0.0095586	-0.103782	1.30266	1.04146	0.0265595	-0.356783	-1.04044	-1.85252	1.706
-0.981818	7.85011	-1.01463	1.73544	0.319143	11.4998	0.205251	-0.000258671	0.160086	-10.3781	-1.51109	-0.00522366	-0.218402	5.81137	-0.861636	0.00856836	-0.0762407	1.39243	1.11728	0.0259957	-0.360589	-1.02896	-1.85781	1.70636
-0.762402	0.450407	-2.10525	1.73453	0.382032	2.23243	-1.25272	-0.00136821	0.186849	-8.45047	-1.15756	-0.00378904	-0.141971	5.70286	-0.842719	0.00859599	-0.0417519	1.37205	1.13137	0.0245931	-0.36405	-1.01458	-1.86284	1.7065

## Sheet: Russia
FSI.signal	OGAP.signal	CA.signal	CGD.signal	FSI.IMF1	OGAP.IMF1	CA.IMF1	CGD.IMF1	FSI.IMF2	OGAP.IMF2	CA.IMF2	CGD.IMF2	FSI.IMF3	OGAP.IMF3	CA.IMF3	CGD.IMF3	FSI.IMF4	OGAP.IMF4	CA.IMF4	CGD.IMF4	FSI.Residual	OGAP.Residual	CA.Residual	CGD.Residual
5.0513	0.0119425	8.68888	1.86392	0.744801	0.00114745	-0.100596	-0.0311816	1.00787	-0.000213524	-0.0511898	-0.00601781	0.135225	0.0174928	-0.521537	0.0591014	1.13657	-0.00181328	-0.0477943	0.342322	0.547909	-0.00467094	7.42817	1.49969
3.50555	0.0111932	8.75925	1.89192	-0.458797	0.000204751	-0.0161535	-0.0136968	0.80227	-0.000124005	-0.0488786	-0.00850502	0.141927	0.0175333	-0.527305	0.0687186	1.08654	-0.00179856	-0.0620419	0.348039	0.536245	-0.00462227	7.4157	1.49736
3.00675	0.0104364	8.82962	1.91992	-0.540022	-0.000124483	0.0041721	-0.00264649	0.569006	-0.000317946	-0.0178625	0.00650987	0.121592	0.0172152	-0.502443	0.0718148	1.0182	-0.00176506	-0.0677294	0.350078	0.524364	-0.00457126	7.40173	1.49417
3.47217	0.00965774	8.89999	1.94792	0.347819	-9.48444e-05	0.00578257	0.0205132	0.37193	-0.000573977	0.00120862	0.0209677	0.078439	0.016558	-0.452177	0.068051	0.933766	-0.00171339	-0.0647792	0.348293	0.512286	-0.00451803	7.38635	1.4901
2.86722	0.00883614	8.97036	1.90329	0.258167	4.64006e-06	0.00880931	-0.0017208	0.112046	-0.000674945	-0.00172881	0.0186418	0.0201585	0.015614	-0.385983	0.0582754	0.836218	-0.0016448	-0.0544048	0.3429	0.500027	-0.00446271	7.36969	1.48519
1.93861	0.00794461	9.04074	1.85865	0.00784271	5.09981e-05	0.00610082	-0.00276074	-0.295421	-0.000575102	-0.00915702	0.00296809	-0.0419063	0.0144348	-0.31279	0.0446564	0.72859	-0.00156064	-0.0387681	0.334307	0.487604	-0.00440544	7.35191	1.47948
1.11452	0.00695062	9.11111	1.81401	-0.145093	3.46115e-05	9.86541e-05	0.000345147	-0.697756	-0.000327525	-0.0145175	-0.0122349	-0.0936651	0.0130522	-0.239368	0.0299204	0.613903	-0.00146232	-0.0208221	0.322976	0.475035	-0.00434634	7.33316	1.47301
0.801066	0.00581665	9.18148	1.76938	-0.0237742	3.38698e-05	-5.6786e-05	-0.00466732	-0.883052	-5.30639e-05	-0.0199728	-0.0179385	-0.121039	0.0114727	-0.16977	0.0167865	0.495132	-0.0013513	-0.00417519	0.309381	0.462338	-0.00428556	7.31359	1.46582
0.573374	0.00450086	9.25185	1.74847	-0.0913081	4.13706e-05	-0.000579557	0.0020716	-0.825582	0.000247108	-0.0163499	-0.0126945	-0.114678	0.00966468	-0.103829	0.00714643	0.37514	-0.00122905	0.0074317	0.293997	0.44953	-0.00422324	7.29333	1.45795
0.81794	0.00295776	9.32222	1.72756	0.183002	-6.51962e-06	-0.0027555	0.000879908	-0.671745	0.000649392	-0.00410522	-0.00146939	-0.0751224	0.00757126	-0.0366246	0.00142145	0.256379	-0.00109685	0.010371	0.277282	0.436629	-0.00415951	7.27249	1.44945
0.541394	0.00113906	9.39259	1.70665	-0.100525	-3.31844e-05	-0.00281194	-0.000568839	-0.506007	0.00111365	0.00695962	0.00850316	-0.0138108	0.00510901	0.0408141	-0.00129337	0.140774	-0.000955906	0.00158499	0.259657	0.423652	-0.00409452	7.25109	1.44035
0.674469	-0.00100541	9.46296	1.68574	-0.0874748	1.72223e-05	-0.00290175	0.00379044	-0.231402	0.00162295	0.00794036	0.0123092	0.0466848	0.00219027	0.1419	-0.002579	0.029961	-0.000807443	-0.0210837	0.241511	0.410617	-0.00402841	7.2291	1.43071
1.08276	-0.00352649	9.53333	1.64876	0.0921874	9.8158e-05	-0.00202694	-0.0003059	0.166179	0.00221497	-0.0167421	0.00919332	0.08616	-0.00122554	0.282266	-0.00385315	-0.0746963	-0.000652752	-0.0582957	0.223167	0.397541	-0.00396132	7.20642	1.42056
1.11741	-0.00647442	9.60371	1.61178	-0.0366982	7.00825e-05	0.000516985	5.80974e-05	0.521151	0.00290935	-0.0792249	0.00259665	0.0952952	-0.00506729	0.471823	-0.00566136	-0.172281	-0.000493176	-0.108042	0.204842	0.384441	-0.00389339	7.18295	1.40994
1.16156	-0.00989723	9.67408	1.5748	0.105236	-9.90453e-05	0.0022448	0.000394833	0.64014	0.00346968	-0.175141	-0.00360384	0.0706597	-0.00911303	0.704391	-0.00750174	-0.262498	-0.000330072	-0.165503	0.186607	0.371335	-0.00382476	7.15858	1.3989
0.553438	-0.0138389	9.74445	1.53782	-0.0519695	-0.00016654	0.0057695	-0.00328711	0.424863	0.00326717	-0.283608	-0.00656337	0.0188103	-0.0130192	0.950704	-0.00819881	-0.345735	-0.000164797	-0.224363	0.168392	0.358239	-0.00375557	7.13319	1.38748
0.184555	-0.0183372	9.81482	1.51438	0.277174	0.000269665	0.0247093	0.000965933	-0.0366468	0.00149793	-0.369947	-0.00575166	-0.0417596	-0.0164201	1.15628	-0.00658305	-0.422778	1.28925e-06	-0.277873	0.150042	0.345171	-0.00368595	7.10666	1.3757
-1.09593	-0.0234213	9.88519	1.49093	-0.41118	0.00101642	0.0176771	0.00119979	-0.411838	-0.00200689	-0.321624	-0.00317656	-0.0899723	-0.0189816	1.24408	-0.00206133	-0.494539	0.000166827	-0.319587	0.131351	0.332147	-0.00361604	7.07888	1.36362
-1.08235	-0.0291089	9.95556	1.46749	-0.204667	0.000294917	-0.106283	0.000140793	-0.425488	-0.00580152	0.0215794	-0.00112242	-0.107178	-0.0203868	1.14058	0.00510562	-0.561886	0.000330441	-0.344632	0.1121	0.319183	-0.00354597	7.04971	1.35126
-0.208518	-0.035403	10.0259	1.44404	0.535768	-0.00498818	-0.292417	0.000341881	-0.156751	-0.00709417	0.631669	-0.000946063	-0.0868418	-0.0203355	0.817355	0.0138941	-0.625359	0.000490662	-0.350762	0.0920769	0.306295	-0.00347588	7.01902	1.33868
-0.768827	-0.0422885	10.0963	1.41715	-0.224191	-0.0167266	-0.0695206	-0.00100417	0.142491	-0.00410139	1.02301	-0.00162824	-0.0375805	-0.0187006	0.288237	0.0227942	-0.684814	0.000645939	-0.336791	0.0710902	0.2935	-0.00340592	6.98669	1.3259
-0.897186	-0.0162533	10.1667	1.39025	-0.401185	0.000445075	1.14432	-0.00214481	0.268415	0.00171901	0.549177	0.00029639	0.0262836	-0.0158759	-0.382721	0.030165	-0.739672	0.00079479	-0.301652	0.048978	0.280813	-0.00333621	6.95257	1.31296
-0.250806	0.0189154	6.145	1.36336	0.412405	0.0265613	-1.11465	-0.00116382	0.171052	0.00707527	-0.578383	0.0045188	0.0887791	-0.0123899	-1.03571	0.034474	-0.789109	0.00093576	-0.244279	0.0256273	0.268251	-0.0032669	6.91653	1.2999
-0.7915	0.024175	6.44362	1.33646	0.160266	0.0260656	0.120815	0.00685222	-0.0431066	0.00901038	-1.10196	0.00728049	0.136702	-0.00877018	-1.48381	0.0345533	-0.832205	0.00106739	-0.163625	0.00101256	0.25583	-0.00319813	6.87846	1.28676
-1.59271	-0.0341995	6.61341	1.28321	-0.427685	-0.0338482	-0.0479731	-0.00154824	-0.168681	0.00705596	-0.717703	0.0059424	0.160056	-0.00546547	-1.58129	0.0299832	-0.86799	0.00118822	-0.0591344	-0.0247446	0.243565	-0.00313003	6.83822	1.27358
-0.967406	-0.00655203	8.09008	1.22997	0.179416	-0.00509352	0.457938	-0.00226381	-0.044825	0.00294055	-0.042476	0.00201002	0.152633	-0.00263313	-1.35124	0.0211755	-0.89523	0.00129679	0.0664282	-0.051355	0.231473	-0.00306273	6.7957	1.2604
-0.951337	0.0244537	8.31857	1.17672	0.133295	0.0279604	-0.413602	-0.000659013	0.135065	-0.00162223	0.51216	-0.000827796	0.118449	-0.000279664	-0.875523	0.00934429	-0.912304	0.00139164	0.204101	-0.0783987	0.219569	-0.00299638	6.7508	1.24727
-1.06856	0.0241521	9.77715	1.12348	0.183007	0.0292149	0.0908176	-0.000567354	0.0867437	-0.00523304	0.770068	-0.00100298	0.0664524	0.00163015	-0.24215	-0.00379284	-0.917311	0.00147126	0.34336	-0.10537	0.207872	-0.00293109	6.70342	1.23421
-1.45612	-0.0376851	10.6487	1.07425	0.134913	-0.0321168	0.412838	0.00169239	-0.142256	-0.0074167	0.577963	-0.000576969	0.00339691	0.00318127	0.454485	-0.0164297	-0.9082	0.00153416	0.473643	-0.131728	0.196396	-0.00286701	6.65347	1.22129
-2.22261	-0.00882356	9.80509	1.02501	-0.456366	-0.00357252	-0.499444	0.00268536	-0.220296	-0.00856626	-0.0129221	-0.0022884	-0.0678919	0.00454063	1.09785	-0.027003	-0.882851	0.00157882	0.584365	-0.156918	0.185157	-0.00280424	6.60085	1.20854
-1.15476	0.0216177	10.8767	0.975777	0.444932	0.0258661	0.629207	0.0010435	0.0242645	-0.00901377	-0.493631	-0.00641498	-0.143748	0.00590463	1.54531	-0.0344764	-0.839127	0.00160374	0.664872	-0.180376	0.174172	-0.00274294	6.5455	1.196
-1.51412	0.0286001	9.71094	0.926542	-0.138505	0.0312742	-0.818224	-0.00836746	0.295962	-0.00902919	-0.273088	-0.00874871	-0.215079	0.00743078	1.68095	-0.0385302	-0.774942	0.00160749	0.704553	-0.20154	0.163455	-0.00268319	6.48738	1.18373
-1.49792	-0.0350614	10.9459	0.908774	-0.244349	-0.0342185	-0.0541194	0.00154898	0.422225	-0.0090361	0.495708	-0.00492427	-0.270639	0.00922964	1.51571	-0.0397295	-0.688523	0.00158862	0.696099	-0.219887	0.153023	-0.00262506	6.4265	1.17177
-1.18506	-0.002678	11.9379	0.891006	0.0580007	-0.00356604	0.962188	0.00250837	0.380178	-0.00937962	1.05464	0.00271333	-0.297607	0.0112905	1.11928	-0.0394106	-0.579298	0.00154574	0.643093	-0.234963	0.14289	-0.00256857	6.36296	1.16016
-1.02631	0.0287912	9.03146	0.873238	0.344708	0.0261103	-0.896298	0.000365229	0.133605	-0.0097382	0.776906	0.00945594	-0.284649	0.0134554	0.582914	-0.0391289	-0.449323	0.00147742	0.552162	-0.246401	0.133073	-0.00251368	6.29692	1.14895
-2.06465	0.0393453	8.98577	0.855469	-0.480797	0.0344779	0.708788	-0.00103901	-0.263475	-0.00955356	-0.0124959	0.0122921	-0.227314	0.0154992	-0.00531107	-0.0400016	-0.303444	0.00138223	0.430027	-0.253959	0.123587	-0.00246034	6.22862	1.13818
-1.19759	-0.0265407	6.07744	0.837701	0.521772	-0.0346844	-0.540483	0.00024636	-0.641361	-0.0078663	-0.807143	0.00921645	-0.127191	0.0171598	-0.564834	-0.0420989	-0.147579	0.00125872	0.283394	-0.257551	0.114447	-0.0024085	6.15829	1.12789
-1.55126	0.00925297	5.77116	0.819933	0.00494096	-0.00432236	0.550829	0.00321741	-0.767536	-0.00334584	-1.42361	0.000179446	0.010643	0.0181738	-1.01694	-0.0443152	0.0122027	0.00110547	0.118956	-0.257264	0.105666	-0.00235813	6.08618	1.11812
-1.5794	0.0403159	4.17537	0.802165	-0.603842	0.0203935	-0.369507	0.00251332	-0.502997	0.00302744	-1.47484	-0.0110745	0.172041	0.0182825	-1.29567	-0.0448104	0.169858	0.000921634	-0.0565416	-0.253346	0.0972548	-0.00230916	6.01253	1.10888
-0.254738	0.056432	4.39301	0.784396	-0.201744	0.0313186	-0.5139	-0.010572	0.119407	0.0094427	-0.664303	-0.0172821	0.320335	0.0172228	-1.39007	-0.0417614	0.319351	0.00070944	-0.236138	-0.246185	0.0892214	-0.00226156	5.9376	1.1002
1.3675	-0.00788322	6.53009	0.810984	0.607106	-0.0345318	0.579304	0.00262496	0.696874	0.0136595	0.693164	-0.0129929	0.413281	0.0147292	-1.34925	-0.0344199	0.454651	0.000475238	-0.412485	-0.236287	0.0815654	-0.00221527	5.86164	1.09206
0.631539	0.0244669	7.14524	0.837571	-0.378106	0.00293599	0.398302	0.0026018	0.821639	0.0127986	1.72158	-0.00162784	0.409668	0.0106758	-1.23511	-0.023654	0.569772	0.000226763	-0.578144	-0.22421	0.0742839	-0.00217027	5.78487	1.08446
0.573901	0.0511344	6.01985	0.864159	-0.14439	0.0404783	-0.523497	0.000265154	0.544862	0.0073194	1.71929	0.00844085	0.28735	0.0054913	-1.10607	-0.0114267	0.659253	-2.81212e-05	-0.72599	-0.210518	0.0673737	-0.00212648	5.70756	1.0774
0.297998	0.0360347	6.15761	0.890746	0.155345	0.03965	0.945026	0.00422424	0.0898951	-0.00108654	0.587527	0.0115427	0.0833118	-0.000163372	-0.997403	-0.000121328	0.719085	-0.000281552	-0.850301	-0.195756	0.0608313	-0.00208388	5.62993	1.07086
-0.166086	-0.0630322	3.97552	0.898877	0.356971	-0.0461519	0.487065	-0.00156205	-0.397033	-0.00871022	-0.947082	0.00775992	-0.151205	-0.00560201	-0.905302	0.00828109	0.74602	-0.000525665	-0.94862	-0.180433	0.0546536	-0.00204242	5.55221	1.06483
-1.36141	-0.0389457	1.11626	0.907008	-0.441075	-0.0144662	-1.31482	-0.00172825	-0.605459	-0.0115822	-1.83964	0.00154012	-0.365005	-0.0101427	-0.813733	0.0128795	0.736943	-0.000752597	-1.02258	-0.164996	0.0488369	-0.00200204	5.47461	1.05931
-0.505732	0.00083187	1.9677	0.915139	0.265314	0.0272262	-0.921804	-0.000425174	-0.302671	-0.0102646	-1.25663	-0.00267556	-0.509517	-0.0132125	-0.703995	0.013752	0.688911	-0.000954485	-1.07624	-0.149806	0.0433764	-0.00196271	5.39736	1.05429
-0.311148	0.0141419	5.68115	0.923269	0.117803	0.0380616	1.24813	0.00081934	0.123896	-0.00621049	0.354894	-0.00392489	-0.548051	-0.0146614	-0.555791	0.0117256	0.59949	-0.00112347	-1.11434	-0.135119	0.0382648	-0.00192437	5.32066	1.04977
-0.344688	-0.0557698	5.54275	0.929658	-0.0809331	-0.0366657	-0.203602	0.000188431	0.276878	-0.00132448	1.66333	-0.00312647	-0.452682	-0.0146404	-0.349293	0.00791361	0.469114	-0.0012523	-1.14121	-0.121049	0.0334936	-0.00188698	5.24474	1.04573
-0.226768	-0.0275248	6.53945	0.936048	0.0860949	-0.0125951	0.887941	-0.000110789	0.110503	0.00161074	1.48261	-0.00172699	-0.223998	-0.0133525	-0.0743097	0.00328539	0.307452	-0.00133741	-1.15972	-0.107581	0.0290543	-0.00185049	5.1698	1.04218
-0.312235	0.00755615	4.81659	0.942437	0.050326	0.0193705	0.337266	-0.000161801	-0.114073	0.00239333	0.169798	-0.000450384	0.0783357	-0.0110123	0.243712	-0.00145945	0.127438	-0.00138048	-1.17138	-0.0946036	0.024938	-0.00181487	5.09604	1.03911
-0.595907	0.0262036	2.34569	0.948826	-0.395449	0.0356906	-1.01186	-0.000607204	-0.119114	0.00158025	-1.1061	0.000749001	0.376485	-0.00790254	0.563546	-0.00589223	-0.0577267	-0.00138466	-1.1769	-0.081946	0.021136	-0.00178007	5.02364	1.03652
0.575582	-0.0433883	3.51744	0.956887	0.483361	-0.0360667	0.324544	0.000174201	0.0692704	0.000213787	-1.39788	0.00156244	0.60285	-0.00443617	0.844271	-0.00985402	-0.234842	-0.00135316	-1.17635	-0.0694038	0.0176394	-0.00174608	4.95274	1.03441
-0.284305	-0.016625	3.75957	0.964949	-0.46553	-0.0127025	-0.0125729	0.000580854	0.163033	0.000166859	-0.890052	0.00158507	0.699336	-0.00108724	1.05647	-0.0132164	-0.391306	-0.00128914	-1.16948	-0.0567683	0.0144395	-0.00171293	4.88347	1.03277
0.354597	0.00813591	4.66618	0.973011	0.36101	0.00783308	0.136448	8.60791e-05	0.115869	0.00134744	-0.127033	0.000997478	0.630947	0.00183182	1.17805	-0.015802	-0.518074	-0.00119578	-1.15564	-0.0438671	0.0115277	-0.00168065	4.81594	1.0316
-0.419591	0.0386591	4.71637	0.981072	-0.00155453	0.0347662	-0.450486	-0.00224104	-0.0432681	0.00240027	0.617963	0.000368486	0.418325	0.00421807	1.18223	-0.0173357	-0.611369	-0.00107621	-1.13388	-0.0306088	0.00889509	-0.0016493	4.75021	1.03089
-0.931758	-0.0279623	5.73924	0.996724	-0.0265673	-0.0340965	0.421266	0.000702815	-0.212006	0.00265936	1.00725	-0.000131972	0.105713	0.0060274	1.04031	-0.0174961	-0.668646	-0.000933646	-1.10355	-0.0169926	0.00653307	-0.0016189	4.68636	1.03064
-1.33407	-0.00437891	4.83466	1.01238	-0.177606	-0.0116906	0.133692	0.00139789	-0.133028	0.00242109	0.774435	-0.000819837	-0.254615	0.00725204	0.7368	-0.0159376	-0.687417	-0.000771922	-1.06498	-0.0031122	0.00443326	-0.00158953	4.62443	1.03085
-0.899002	0.0150919	3.20632	1.02803	0.178145	0.00738637	-0.45286	0.000476995	0.21212	0.00189421	0.231592	-0.00234424	-0.588223	0.00796928	0.303936	-0.0124497	-0.665385	-0.000596763	-1.01925	0.0108439	0.00258851	-0.00156122	4.56446	1.0315
-1.08184	0.0415212	2.81017	1.04368	-0.101828	0.0346348	0.0863841	-0.00263844	0.420807	0.000521379	-0.148827	-0.00375162	-0.807068	0.00831496	-0.198279	-0.00713263	-0.600573	-0.000415912	-0.967749	0.0246063	0.00099364	-0.00153403	4.50649	1.03259
-0.988099	-0.030094	2.20336	1.06762	0.112334	-0.0356147	0.190121	-0.000536793	0.193041	-0.00116724	-0.319527	-0.00331384	-0.846955	0.00843417	-0.697318	-0.000483303	-0.492491	-0.00023824	-0.911909	0.0378289	-0.000356028	-0.00150801	4.45055	1.03413
-0.696355	-0.00344937	1.64527	1.09156	0.637357	-0.00902285	0.18732	-0.00101134	-0.35673	-0.00130822	-0.428808	-0.000169749	-0.711421	0.00843797	-1.11311	0.00653627	-0.347267	-7.30678e-05	-0.853184	0.0501194	-0.00146512	-0.0014832	4.39669	1.03609
-0.814828	0.0156664	0.675581	1.11551	0.353658	0.00871736	-0.555753	-0.000980022	-0.679739	1.20926e-05	-0.376103	0.00424881	-0.426185	0.0083236	-1.37138	0.0126907	-0.176511	7.29678e-05	-0.793089	0.0610672	-0.00233819	-0.00145965	4.34493	1.03848
-1.55883	0.0470609	1.89372	1.13945	-1.36817	0.0397198	0.472863	0.00501611	-0.305854	0.000553809	-0.136366	0.00602299	-0.0345787	0.00802598	-1.40787	0.0168434	0.00714481	0.000198691	-0.733518	0.0702733	-0.00297947	-0.00143742	4.2953	1.0413
2.70816	-0.0351297	1.55732	1.14227	1.47232	-0.0415358	-0.156284	-0.00134975	0.504649	9.00003e-05	-0.0539288	0.0033732	0.372463	0.00742702	-1.189	0.0183239	0.191069	0.000305552	-0.67669	0.0773933	-0.00339254	-0.00141656	4.24785	1.04453
0.92802	-0.00535846	1.90309	1.14509	-1.03248	-0.0107294	-0.0860644	-0.00202683	0.716353	-6.35263e-06	-0.230851	-0.000409106	0.692535	0.00637869	-0.732041	0.017175	0.362631	0.00039578	-0.623689	0.0821701	-0.00358047	-0.00139713	4.2026	1.04818
0.808921	0.0178833	2.61602	1.14791	-1.13549	0.0135954	0.269004	-0.000541101	0.383118	0.0003781	-0.494631	-0.00236385	0.84559	0.0048167	-0.109305	0.0141096	0.509197	0.00047233	-0.575189	0.0844589	-0.00354589	-0.00137923	4.15956	1.05224
2.28496	0.0476423	3.07559	1.15073	0.684057	0.0451394	0.0947465	0.00185718	-0.0792836	0.000496324	-0.543378	-0.00228432	0.841434	0.00283124	0.571668	0.0101889	0.618592	0.000538291	-0.531774	0.0842461	-0.00329114	-0.00136296	4.11875	1.05672
1.72768	-0.0449101	3.19094	1.14837	0.411676	-0.0448748	-0.874852	0.000207914	-0.316394	8.00869e-05	-0.0767441	-0.00153194	0.719664	0.00063638	1.18636	0.00646393	0.682859	0.000596724	-0.493968	0.0816383	-0.00281823	-0.00134846	4.08014	1.06159
0.934047	-0.0218339	6.2266	1.14601	-0.132897	-0.0192941	1.02971	-0.000207142	-0.388586	-0.000363746	0.632522	-0.00110678	0.515821	-0.00149082	1.60321	0.00363314	0.704136	0.000650694	-0.462226	0.0768509	-0.002129	-0.00133585	4.0437	1.06684
0.729469	0.00774241	5.00704	1.14366	-0.0692549	0.0122795	-0.452992	-0.000125446	-0.393016	-0.000632109	0.796691	-0.000820553	0.267195	-0.00328291	1.69635	0.00197422	0.687241	0.000703222	-0.436726	0.0701874	-0.00122466	-0.00132527	4.00939	1.07244
0.619028	0.0380114	4.28633	1.1413	0.0430676	0.0436906	-0.406794	7.91897e-05	-0.304639	-0.000561734	0.316768	-0.000497342	0.00839654	-0.00455742	1.40161	0.00136359	0.636788	0.000756841	-0.416065	0.0620097	-0.000104654	-0.00131685	3.97714	1.07835
0.418738	-0.0484648	4.11123	1.13851	0.0120144	-0.0426411	0.768526	-0.000191864	-0.149692	-5.54708e-05	-0.453677	1.3421e-05	-0.231229	-0.00526989	0.807899	0.00146624	0.557305	0.000812362	-0.395736	0.052714	0.001232	-0.00131074	3.94686	1.08451
0.21207	-0.0232105	1.41878	1.13573	-0.0606643	-0.0176642	-0.715817	-0.000150052	0.0236277	0.000390739	-0.922949	0.000383188	-0.426726	-0.00549841	0.0445544	0.00188182	0.453315	0.000868405	-0.370481	0.0427143	0.00278621	-0.00130706	3.91848	1.0909
0.121374	0.00505495	1.61712	1.13294	-0.0080557	0.0102359	-0.0755952	6.8366e-05	0.143487	0.000577454	-0.606422	0.000878474	-0.555801	-0.00537542	-0.753939	0.00212047	0.329355	0.000922946	-0.33504	0.0324159	0.0045586	-0.00130593	3.89189	1.09746
0.0526733	0.0371814	2.05694	1.13016	0.157038	0.0421203	0.0597852	0.000564316	0.106765	0.000408541	0.318926	0.00150627	-0.60149	-0.00501464	-1.4353	0.00173612	0.189968	0.000974574	-0.284178	0.0222032	0.00654955	-0.00130743	3.86702	1.10415
-0.534587	-0.0462083	2.50342	1.12541	-0.131111	-0.041363	0.1247	-5.18183e-05	-0.0685401	-9.42953e-05	1.01214	0.00162496	-0.561662	-0.00446092	-1.83257	0.000490043	0.0397643	0.00102166	-0.212671	0.012435	0.00875933	-0.00131165	3.8438	1.11092
-0.598503	-0.0168123	2.82018	1.12067	-0.017818	-0.0124831	0.576109	0.000345631	-0.192869	-0.000361433	0.747534	0.000715809	-0.444275	-0.0037115	-1.81716	-0.00155586	-0.116081	0.00106232	-0.11632	0.00344579	0.0111883	-0.00131863	3.82213	1.11772
-0.592275	0.0124568	1.51719	1.11593	-0.0742507	0.0157347	-0.228791	0.000478769	-0.137136	-0.000309742	-0.288124	-0.000453918	-0.267687	-0.00273436	-1.42207	-0.00414382	-0.270769	0.00109464	0.0043628	-0.00446349	0.0138367	-0.00132844	3.80194	1.12451
-0.2211	0.0375426	1.16012	1.11119	0.0810179	0.0394495	-0.510783	-0.0014422	0.0372099	-0.000168528	-1.18673	-0.000693703	-0.0658361	-0.0015141	-0.764611	-0.00688192	-0.41597	0.00111679	0.145577	-0.0110369	0.0167049	-0.00134109	3.78311	1.13124
-0.110628	-0.0395589	2.73237	1.11324	0.014109	-0.0392146	0.121237	0.000692958	0.169585	-3.21936e-05	-1.22241	8.71646e-05	0.120573	-8.26633e-05	0.0265068	-0.00933139	-0.542609	0.00112723	0.302998	-0.0160746	0.0197932	-0.00135662	3.76553	1.13786
-0.0904245	-0.00962195	4.13506	1.11528	0.0210977	-0.0108428	-0.345314	0.00110379	0.163856	7.64037e-06	-0.350792	0.000404509	0.252662	0.00146347	0.825546	-0.0111143	-0.641753	0.00112477	0.472344	-0.0194375	0.0231018	-0.00137502	3.74908	1.14433
-0.182122	0.0191269	5.93875	1.11733	0.0716756	0.0163865	-0.633347	0.000265513	0.0457826	5.64322e-05	0.872235	-0.000557584	0.305518	0.00297192	1.48674	-0.0119161	-0.70601	0.00110835	0.649349	-0.0210579	0.0266311	-0.00139626	3.73362	1.1506
-0.441268	0.0466849	8.88471	1.11938	-0.0302823	0.0424654	0.992035	-0.00298216	-0.0452903	0.000313363	1.6092	-0.00165221	0.276891	0.00424963	1.85883	-0.0116702	-0.732337	0.00107692	0.829749	-0.0209529	0.0303811	-0.00142033	3.71903	1.15664
-0.796467	-0.0388757	8.76715	1.13178	-0.322286	-0.0443842	1.04382	0.000381454	-0.0162607	0.00082754	1.2613	-0.00128482	0.185125	0.00509872	1.82699	-0.0105171	-0.72364	0.00102944	1.00905	-0.0192196	0.034352	-0.00144717	3.70518	1.16242
-0.130427	-0.00922284	5.20506	1.14418	0.40312	-0.0151992	-1.10731	0.000616852	0.012474	0.00111818	0.0453943	0.000392036	0.0654105	0.00536939	1.42878	-0.0086989	-0.684927	0.000965476	1.18177	-0.0160452	0.0385417	-0.0014767	3.69194	1.16791
-0.965308	0.0255532	4.25545	1.15658	-0.243906	0.0201302	-0.435171	-0.000241294	-0.123094	0.00103537	-1.10723	0.00179288	-0.0451852	0.00500965	0.770352	-0.00636935	-0.621441	0.000886866	1.34194	-0.0116995	0.0429479	-0.00150887	3.67918	1.17309
-0.888429	0.0541218	4.20393	1.16897	-0.0569581	0.0503276	0.645506	-0.000667376	-0.237038	0.000450595	-1.60756	0.00173035	-0.120663	0.00408951	-0.0303518	-0.0034985	-0.538664	0.000797674	1.48358	-0.00652476	0.0475687	-0.00154357	3.66676	1.17793
-0.713337	-0.0377277	2.46444	1.18137	-0.0234823	-0.0390224	-0.526028	-0.000116984	-0.16494	-0.000584199	-1.51335	-0.000102249	-0.145135	0.00275703	-0.834239	9.18197e-05	-0.442835	0.000702552	1.60066	-0.00090979	0.0524033	-0.00158071	3.65454	1.18241
-0.365606	-0.0493545	3.05845	1.19377	0.0351322	-0.0484937	0.461942	0.000788452	0.000142143	-0.000995118	-1.37385	-0.00279823	-0.122838	0.00114835	-1.47567	0.00454845	-0.340676	0.000606205	1.68719	0.00474039	0.0574519	-0.00162019	3.64239	1.18649
-0.0323134	0.00534344	1.78061	1.20616	0.134975	0.00717234	-0.384445	0.000931475	0.0759132	-6.74866e-05	-1.5319	-0.00469123	-0.0683629	-0.000612847	-1.81666	0.00976097	-0.2383	0.000513345	1.73715	0.0100149	0.0627153	-0.00166192	3.63017	1.19015
-0.0254547	0.0413018	2.50857	1.21856	0.0123551	0.0439027	0.616869	-6.49101e-05	0.0387849	0.00105143	-1.82867	-0.00444503	-0.000435168	-0.00237522	-1.815	0.0152023	-0.141528	0.00042868	1.74563	0.0145101	0.0681951	-0.00170579	3.61776	1.19336
-0.155826	-0.0458627	1.92556	1.23096	-0.272907	-0.0414351	-0.343454	-0.00207723	0.0457486	0.000916652	-1.73952	-0.000873625	0.0593307	-0.00394944	-1.50291	0.0199632	-0.0561875	0.000356922	1.71291	0.0178548	0.0738937	-0.0017517	3.60512	1.19609
0.642404	-0.0115195	2.39734	1.24335	0.296926	-0.00416793	-1.20639	-0.00267525	0.16936	-0.000720378	-0.885855	0.00499697	0.0924644	-0.00513443	-0.956075	0.0229877	0.0118995	0.00030279	1.64267	0.0197301	0.0798132	-0.00179958	3.59231	1.19831
0.362088	0.0178495	5.40801	1.25575	-0.10997	0.0272601	-0.358794	0.00299119	0.249848	-0.00211234	0.703431	0.00948103	0.0891371	-0.00571993	-0.279153	0.0233766	0.0571778	0.000271	1.53904	0.0198987	0.0859558	-0.00184932	3.57941	1.2
0.441068	0.016392	9.73985	1.26815	0.0785956	0.0252052	1.7536	0.018268	0.158269	-0.00162232	2.36571	0.00965249	0.0475553	-0.00555522	0.413983	0.0207962	0.0762064	0.000265245	1.40616	0.0182951	0.0923237	-0.00190091	3.5665	1.20114

## Sheet: South Africa
FSI.signal	OGAP.signal	CA.signal	CGD.signal	FSI.IMF1	OGAP.IMF1	CA.IMF1	CGD.IMF1	FSI.IMF2	OGAP.IMF2	CA.IMF2	CGD.IMF2	FSI.IMF3	OGAP.IMF3	CA.IMF3	CGD.IMF3	FSI.IMF4	OGAP.IMF4	CA.IMF4	CGD.IMF4	FSI.Residual	OGAP.Residual	CA.Residual	CGD.Residual
2.50156	0.00701805	0.00833829	1.63067	0.604926	0.00235908	0.514154	0.0103317	0.025641	0.00263501	0.0826891	0.00775834	0.200575	0.000192973	-0.311359	0.0112839	1.25442	0.00234228	-0.714682	0.0897128	0.135339	-0.000511289	0.366013	1.51158
2.9034	0.00424245	-0.797865	1.62373	0.948695	0.00110686	0.0771139	0.00202625	0.073484	0.00169482	-0.208763	0.00792492	0.195882	-0.00040036	-0.371501	0.0118897	1.26717	0.00236327	-0.76678	0.089592	0.131467	-0.00052215	0.357775	1.5123
1.62132	-0.000103664	-2.52059	1.6168	-0.233787	-0.00047295	-1.16024	-0.00111373	-0.0200108	-0.000415032	-0.677933	0.00554112	0.184972	-0.000990469	-0.364728	0.0110124	1.27194	0.00230511	-0.810029	0.0884502	0.127401	-0.000530321	0.341058	1.51291
0.995516	-0.00309088	-2.58691	1.60986	-0.775572	-0.00110513	-1.63914	-0.00076704	-0.0856912	-0.00217107	-0.322973	0.00186452	0.171616	-0.00145102	-0.28416	0.00909292	1.26911	0.00217207	-0.83831	0.086263	0.123143	-0.00053572	0.315639	1.51341
2.4198	-0.00236056	1.63616	1.60214	0.580895	0.000431074	1.58778	3.41639e-05	0.00717498	-0.00256764	0.597297	-0.00168962	0.16073	-0.00165352	-0.193641	0.00692648	1.25921	0.0019678	-0.842753	0.083054	0.1187	-0.000538265	0.281325	1.51382
1.63577	-0.00236473	-1.01319	1.59442	-0.239927	-6.87682e-05	-1.03593	0.00085894	0.0749799	-0.00193327	0.539461	-0.00475129	0.152623	-0.00152179	-0.162691	0.00530025	1.24257	0.00169697	-0.815501	0.0788767	0.114076	-0.00053787	0.238017	1.51413
1.78869	-0.00112242	-0.243527	1.58669	0.035349	2.20932e-05	0.577884	0.000706374	-0.00856432	-0.000907717	-0.285518	-0.00693546	0.145271	-0.00107321	-0.201806	0.00473843	1.21922	0.00137086	-0.753969	0.0738139	0.109281	-0.000534447	0.185766	1.51437
1.55075	0.000125562	-1.8341	1.57897	-0.0799637	-8.15968e-05	-0.848119	-0.0023705	-0.0802868	0.000131027	-0.421725	-0.00643063	0.134516	-0.000399846	-0.26914	0.00526374	1.18889	0.00100389	-0.658502	0.067969	0.10432	-0.000527911	0.124769	1.51454
1.72253	0.00163873	-0.327737	1.57941	0.128415	0.000244203	0.320492	-0.000908083	-0.0509739	0.000938885	-0.111027	-0.00210103	0.117953	0.000363155	-0.299923	0.00631616	1.15094	0.000610657	-0.530142	0.061458	0.0992018	-0.000518174	0.055404	1.51465
1.69587	0.00205036	0.340522	1.57986	0.0752754	-0.000201208	0.76053	-0.000210449	0.0536139	0.00148729	-0.0229016	0.00391695	0.0993448	0.00106385	-0.235363	0.00704024	1.10427	0.000205584	-0.370998	0.0544025	0.0939315	-0.000505151	-0.0218352	1.51471
1.04248	0.00273042	-1.23408	1.5803	-0.582603	-4.4611e-05	-0.910612	0.00422147	0.141908	0.00188739	-0.166872	0.0078546	0.086611	0.00157335	-0.0821575	0.00656209	1.0473	-0.000196957	-0.187968	0.0469365	0.0885154	-0.000488755	-0.106424	1.51472
2.31548	0.00277227	0.910796	1.56473	0.862	6.91772e-05	0.73329	-0.00109942	0.0533148	0.00190911	0.0814069	0.00756378	0.0881799	0.00184682	0.0804756	0.00434764	0.977969	-0.000583934	0.0089708	0.0392029	0.0829592	-0.000468901	-0.19784	1.51471
1.42857	0.00175106	0.211185	1.54915	0.240501	7.33773e-05	-0.476496	-0.00124865	-0.129105	0.00115194	0.385373	0.00384117	0.105403	0.00191873	0.203592	0.00051368	0.893989	-0.000947472	0.209102	0.0313647	0.0772687	-0.000445512	-0.295559	1.51468
-0.212364	0.000183045	1.28541	1.53358	-1.25816	0.000383184	0.808944	0.00061041	-0.182708	-0.000368686	0.0415709	-0.00114551	0.134688	0.00187281	0.27018	-0.00413324	0.793128	-0.00128575	0.401353	0.0235942	0.0714495	-0.000418513	-0.399064	1.51466
2.42556	-0.00245626	-0.701395	1.51801	1.2941	-0.000397098	-0.836234	0.000929315	0.00934825	-0.00185815	-0.388634	-0.00516752	0.165426	0.00178521	0.31973	-0.00844976	0.673798	-0.00159839	0.574857	0.0160503	0.0655071	-0.00038783	-0.507836	1.51465
-0.00341205	-0.0029875	0.329004	1.50244	-1.13667	-0.000188078	-0.021056	-0.0033636	0.154531	-0.00226324	-0.251184	-0.00639145	0.178485	0.00169924	0.394247	-0.0113462	0.535719	-0.00188202	0.719787	0.00886499	0.0594471	-0.000353392	-0.621346	1.51467
0.293892	-0.00223049	1.60327	1.50145	-0.646866	-5.64754e-05	0.791324	0.000882233	0.159517	-0.00132429	0.160458	-0.00413176	0.155316	0.00159554	0.48326	-0.0121722	0.380186	-0.00213014	0.828774	0.00212968	0.0532747	-0.00031513	-0.739031	1.51475
1.31032	-0.000768174	0.579241	1.50047	0.716404	0.000142312	-0.408479	0.000959072	0.0654011	0.000310096	0.349954	-0.000293607	0.0916951	0.00138751	0.554372	-0.0109486	0.21015	-0.00233512	0.896469	-0.00411698	0.0469954	-0.000272973	-0.860288	1.51487
-0.202434	2.29902e-05	0.622403	1.49949	-0.382198	0.000140637	-0.14137	0.000235134	-0.0589422	0.00163629	0.234793	0.00230294	0.00072779	0.000963167	0.578139	-0.00820857	0.0305152	-0.00249024	0.91996	-0.00989114	0.0406144	-0.000226853	-0.984525	1.51505
-0.306225	-0.000561646	0.547203	1.49851	-0.118397	-3.36435e-05	0.268497	0.00053218	-0.125462	0.00200592	-0.0355063	0.00268629	-0.0973865	0.000232518	0.541872	-0.00473676	-0.15324	-0.00258972	0.899965	-0.015255	0.0341372	-0.000176718	-1.11121	1.51528
-0.230901	-0.00208601	-0.1708	1.49578	0.156609	2.29446e-05	0.0979387	-3.52682e-05	-0.0422012	0.00143042	-0.263661	0.00186452	-0.178878	-0.000788891	0.442283	-0.00129627	-0.335633	-0.00262789	0.840337	-0.020302	0.0275693	-0.00012259	-1.23986	1.51555
-0.657129	-0.00433485	-1.11722	1.49306	-0.16205	9.1926e-05	-0.48353	-0.000331585	0.0818642	0.000186103	-0.216782	0.00104434	-0.2163	-0.00194937	0.285329	0.00163719	-0.511077	-0.00259884	0.746232	-0.0251485	0.0209162	-6.46757e-05	-1.36999	1.51586
-0.310757	-0.00644278	-0.263108	1.49033	0.396756	0.000256937	0.514862	-0.000377312	0.022244	-0.00116956	0.110808	0.00051891	-0.188967	-0.00303032	0.0974501	0.00393696	-0.672885	-0.0024965	0.622852	-0.0299289	0.0141832	-3.34275e-06	-1.50115	1.51619
-1.39096	-0.00849532	-1.48645	1.48761	-0.517304	-0.00076293	-0.422755	0.000135564	-0.0755733	-0.00166259	0.306486	-4.01137e-07	-0.100763	-0.00381599	-0.0768072	0.00574523	-0.811651	-0.00231479	0.475305	-0.0347919	0.00737566	6.09858e-05	-1.63284	1.51652
-0.73211	-0.00660853	-1.30759	1.48367	0.0494094	0.000314063	0.346154	-7.48277e-05	0.0132838	-0.00083642	0.161714	-0.000590057	0.0251025	-0.00416566	-0.197673	0.00735052	-0.917182	-0.00204839	0.308614	-0.039876	0.000499402	0.000127879	-1.76461	1.51686
-0.109067	-0.00529645	-2.39628	1.47972	0.539812	-0.000136485	-0.0252377	-0.000189213	0.116428	0.000454077	-0.178441	-0.000974933	0.133085	-0.00411421	-0.239033	0.00900881	-0.979474	-0.00169674	0.127815	-0.0453004	-0.00643937	0.000196906	-1.89598	1.51718
-1.02577	-0.00302969	-3.03975	1.47578	-0.312881	0.000740646	-0.197935	-5.0386e-06	0.0455002	0.00101422	-0.362841	-0.00130402	0.165439	-0.00378298	-0.184811	0.0107667	-0.989712	-0.00126922	-0.0613892	-0.0511573	-0.0134344	0.000267645	-2.02649	1.51748
-0.979178	-0.00323748	-2.96396	1.47184	-0.150672	-9.93194e-05	-0.146596	0.000737883	-0.0312703	0.000620762	-0.147633	-0.00158718	0.0964683	-0.00331866	-0.0380422	0.0124224	-0.945452	-0.000779946	-0.251979	-0.0574925	-0.0204808	0.000339679	-2.15565	1.51776
-0.980876	-0.00369012	-2.31305	1.46578	-0.185246	-0.00119592	0.250322	-0.000118173	0.0816781	0.000188109	0.234874	-0.00137862	-0.0625834	-0.0028503	0.159118	0.0135533	-0.853304	-0.000244611	-0.436032	-0.0642862	-0.0275769	0.000412598	-2.28299	1.51801
-0.602156	-0.000813253	-2.43836	1.45973	0.157512	0.000639101	0.155594	-0.000779103	0.183106	0.000177462	0.319069	7.35128e-05	-0.246766	-0.00243461	0.34893	0.0136278	-0.722234	0.000318801	-0.605171	-0.0714573	-0.034722	0.000485994	-2.40806	1.51827
-0.737	0.000243073	-3.30102	1.45368	0.145456	0.000934561	-0.27148	-0.000697609	0.0559659	-0.000119281	0.0254887	0.00262007	-0.391618	-0.00202177	0.48159	0.0120846	-0.561348	0.000890108	-0.751419	-0.0788651	-0.0419146	0.000559456	-2.53036	1.51854
-1.32313	-0.00163881	-3.15652	1.44762	-0.242579	-0.00140829	0.350807	0.00205686	-0.231848	-0.00078908	-0.266461	0.00447605	-0.472158	-0.00152217	0.533364	0.00855488	-0.379933	0.00144815	-0.868503	-0.0863156	-0.049153	0.000632575	-2.64943	1.51885
-0.995135	0.00121818	-4.62131	1.43224	0.153717	0.000437207	-1.0021	-0.000477037	-0.478326	-0.00103771	-0.142518	0.00394113	-0.475852	-0.000858244	0.493359	0.0030943	-0.187271	0.00197198	-0.952546	-0.0935718	-0.056435	0.000704942	-2.76478	1.51925
-0.891102	0.0027316	-2.70261	1.41685	0.135738	0.000304647	0.931906	6.97508e-05	-0.622427	-0.000818243	0.124399	0.0010497	-0.393888	2.75622e-05	0.363381	-0.00366929	0.00743824	0.00244149	-1.00262	-0.100367	-0.0637583	0.000776146	-2.87594	1.51976
-0.887434	0.00419916	-3.06379	1.40146	-0.197488	-0.000121709	0.872284	0.000406356	-0.625411	-0.000510731	0.138302	-0.00224576	-0.230541	0.00114825	0.156628	-0.0107174	0.19445	0.00283758	-1.01957	-0.106422	-0.0711209	0.000845778	-2.98242	1.52044
-0.657089	0.0058186	-5.68921	1.38607	-0.517949	-0.000397005	-1.27173	-0.00300534	-0.44968	-0.000294472	-0.00677221	-0.00386255	-0.0143339	0.00245465	-0.113914	-0.0169096	0.363865	0.003142	-1.00465	-0.111461	-0.0785207	0.000913428	-3.08378	1.52131
1.28954	0.00863372	-3.87741	1.38439	0.80297	0.000867779	0.852683	0.00168211	-0.183877	-0.000380237	0.0234253	-0.00322041	0.21442	0.00383081	-0.433113	-0.021264	0.505783	0.00333667	-0.958847	-0.115223	-0.0859556	0.000978688	-3.17967	1.52241
0.346225	0.00818082	-4.40036	1.3827	-0.788298	-0.000607614	0.560673	0.00157452	0.171244	-0.000749556	0.108319	-0.00190159	0.413852	0.00509333	-0.76675	-0.0232732	0.610306	0.00340352	-0.882701	-0.117477	-0.0934241	0.00104115	-3.26989	1.52378
0.683942	0.00943675	-5.55375	1.38102	-1.01491	-0.000309754	-0.299178	-0.00277769	0.561379	-0.000687743	0.0556864	-0.000568726	0.542452	0.00600942	-1.06608	-0.0230107	0.667532	0.00332447	-0.776262	-0.118057	-0.100925	0.00110036	-3.35434	1.52544
3.00537	0.0119436	-5.86784	1.39107	1.06313	0.00110596	-0.373945	0.000339254	0.800592	0.000230411	-0.0658722	0.00122376	0.556919	0.00636931	-1.2819	-0.0209579	0.669524	0.00308207	-0.639604	-0.116915	-0.108455	0.00115581	-3.43301	1.52738
1.09812	0.0103599	-5.25306	1.40112	-0.40522	-0.00147618	0.306618	0.000813511	0.55739	0.00193561	-0.179111	0.00259162	0.425846	0.00602571	-1.36979	-0.0177664	0.617927	0.00266778	-0.474099	-0.114124	-0.116015	0.00120695	-3.50585	1.52961
-0.131659	0.0124193	-5.62502	1.41118	-0.752726	0.000544398	-0.161934	0.000673638	0.0157705	0.00365544	-0.318773	0.00226019	0.193664	0.00486407	-1.30052	-0.0140153	0.523285	0.00210222	-0.284455	-0.109838	-0.123599	0.00125321	-3.57284	1.53209
-0.480306	0.010425	-5.18863	1.42123	-0.225613	0.000967144	-0.0502002	0.000348121	-0.450642	0.00386839	-0.408801	0.000436934	-0.0755977	0.00287704	-1.07618	-0.0101158	0.397876	0.00141835	-0.0779976	-0.104249	-0.131205	0.00129405	-3.63394	1.53481
-0.51753	0.00507349	-4.12397	1.43128	0.249578	0.00118401	0.344689	-0.00131349	-0.560848	0.00158006	-0.283976	-0.00126378	-0.318332	0.000329914	-0.735742	-0.00628082	0.253979	0.000650578	0.137049	-0.0975772	-0.138832	0.00132892	-3.6891	1.53771
-1.08422	-0.00447668	-4.1515	1.44695	-0.306659	-0.00147598	-0.710607	0.0002883	-0.243966	-0.00187679	0.135491	-0.00147829	-0.479037	-0.00231447	-0.336798	-0.00258073	0.103871	-0.000166692	0.352307	-0.0900616	-0.146477	0.00135725	-3.73829	1.54078
-0.270381	-0.00861133	-1.98671	1.46261	0.308022	-0.000411451	0.416696	9.23274e-05	0.165304	-0.00402561	0.56772	-0.000405928	-0.527575	-0.00455373	0.063607	0.000908361	-0.0401822	-0.000999044	0.55939	-0.0819474	-0.154139	0.00137851	-3.78145	1.54397
-0.620455	-0.0101751	-1.18074	1.47828	-0.0797497	9.08381e-06	0.70104	-0.000233216	0.264389	-0.00382287	0.54442	0.000733303	-0.443201	-0.00594143	0.417533	0.0040054	-0.167382	-0.00181206	0.749898	-0.0734668	-0.161816	0.00139214	-3.81852	1.54724
-0.55827	-0.009809	-2.37227	1.49395	0.0930144	-0.000245143	-0.367994	0.000842576	0.0695837	-0.0020801	-0.0352498	0.000917062	-0.233956	-0.00630955	0.706943	0.00644515	-0.272745	-0.00257179	0.915406	-0.06483	-0.169507	0.00139758	-3.84947	1.55058
-0.828388	-0.00725954	-2.78956	1.50568	-0.146356	0.000586361	-0.627694	-0.00029543	-0.117267	-0.000184976	-0.560227	0.000249366	0.0235878	-0.00580608	0.939248	0.00800251	-0.35339	-0.00324913	1.04742	-0.0562156	-0.17721	0.00139428	-3.87423	1.55394
-0.818372	-0.00609517	-1.61433	1.5174	-0.308616	-8.18412e-06	0.17408	-0.00052212	-0.0911652	0.00102898	-0.465621	-0.000196079	0.244964	-0.00466787	1.12518	0.00858721	-0.406606	-0.0038298	1.13742	-0.0477668	-0.184924	0.0013817	-3.89277	1.5573
-0.137856	-0.00469535	-1.47805	1.52913	0.115872	-0.000231722	-0.44917	-0.000356089	0.0689703	0.00163757	0.117795	0.000150168	0.387158	-0.00314909	1.25984	0.00828288	-0.429686	-0.00431138	1.17704	-0.0395971	-0.192647	0.00135927	-3.90505	1.56065
0.256641	-0.00310638	0.133017	1.54086	0.406438	-0.000222691	0.836046	0.000545211	0.144199	0.00198753	0.40584	0.000837516	0.430717	-0.00150403	1.31613	0.00729446	-0.420089	-0.00469365	1.15867	-0.0317857	-0.200379	0.00132645	-3.91105	1.56396
-0.735212	-0.00126937	-1.83362	1.54888	-0.432743	0.000441211	-0.694957	-0.00064998	0.0294408	0.00192631	0.111719	0.000793146	0.375439	5.68039e-05	1.25773	0.00589131	-0.377283	-0.00497639	1.07817	-0.0243835	-0.20811	0.00128269	-3.91085	1.56723
-0.15636	-0.00124593	-1.42758	1.55691	0.388817	0.000107095	0.264803	-0.000389715	-0.137764	0.00117954	-0.0884142	-8.91913e-05	0.255348	0.00139939	1.04724	0.00436206	-0.306653	-0.00515937	0.940174	-0.0174191	-0.215831	0.00122742	-3.90453	1.57045
-0.969104	-0.0018306	-2.31837	1.56494	-0.2476	-0.000378882	-0.240595	0.000159279	-0.235892	0.000191237	0.0915348	-0.000880866	0.113289	0.00243935	0.673748	0.00295155	-0.216562	-0.00524242	0.755367	-0.0108955	-0.223531	0.00116012	-3.89214	1.5736
-0.616274	-0.00122082	-2.15217	1.57296	0.092224	7.38665e-05	0.580202	0.000115867	-0.169178	-0.000296775	0.137386	-0.00089022	-0.0151486	0.00314778	0.201316	0.00183067	-0.115819	-0.005226	0.535658	-0.00479395	-0.231199	0.00108031	-3.87375	1.5767
-0.701837	-0.0010845	-4.05937	1.5812	-0.253852	-0.00031718	-0.348545	-1.02465e-05	0.116716	-0.000226086	-0.104211	-0.000534601	-0.117964	0.00358435	-0.283975	0.00108267	-0.0130024	-0.00511346	0.293004	0.000917104	-0.238825	0.000987871	-3.84941	1.57974
0.154563	0.000246228	-4.66445	1.58944	0.385984	0.000541678	-0.142448	4.59936e-05	0.336121	-0.000144044	-0.23962	-0.000328173	-0.193549	0.00387765	-0.69725	0.000712633	0.0840806	-0.00491222	0.0393639	0.00626929	-0.246397	0.000883169	-3.81922	1.58274
-0.610011	-0.000225021	-4.76157	1.59767	-0.335443	-5.24164e-05	0.153918	0.000124567	0.279779	-0.000436349	-0.0981414	-0.00012513	-0.242468	0.00412907	-0.971414	0.00069922	0.169082	-0.00463216	-0.213308	0.0112948	-0.253904	0.000766833	-3.78325	1.58568
-0.524864	-0.00033882	-5.22965	1.60591	-0.0886468	-0.000418227	-0.121978	0.00011386	0.0935841	-0.000623042	0.0785856	0.000203871	-0.265411	0.0043446	-1.09373	0.000996287	0.237595	-0.0042817	-0.453165	0.0160197	-0.261335	0.000639551	-3.74162	1.58857
-0.303517	0.000898349	-4.92514	1.61344	0.307007	2.34959e-05	0.446982	-0.000355911	-0.115555	-0.000228748	0.0215878	0.000408394	-0.261338	0.00446685	-1.08023	0.00149775	0.287104	-0.00386526	-0.66943	0.0204617	-0.268677	0.000502018	-3.69441	1.59142
-0.834453	0.0019934	-6.13962	1.62096	-0.086561	0.000175325	-0.537924	-0.00039367	-0.298558	0.000437341	-0.14478	0.000462951	-0.228999	0.0044086	-0.955962	0.0020428	0.316469	-0.00338279	-0.854935	0.0246274	-0.27592	0.000354928	-3.64173	1.59422
-0.849129	0.00207079	-5.65607	1.62849	-0.0744843	-0.000164779	-0.154734	1.13318e-05	-0.381442	0.000761244	-0.0995842	0.000522427	-0.16921	0.00411048	-0.750921	0.00247613	0.325833	-0.00283513	-1.00623	0.0285112	-0.283052	0.000198976	-3.58367	1.59697
-0.700929	0.00250407	-4.79894	1.63602	-0.0740863	0.00075898	0.392784	0.000982793	-0.296716	0.000347497	0.0705594	0.000531955	-0.0868901	0.00359098	-0.50191	0.00274392	0.316403	-0.00222824	-1.1213	0.0321015	-0.290068	3.48564e-05	-3.52034	1.59966
-0.23623	9.00829e-05	-4.68457	1.64079	0.152315	-0.000626704	0.338887	-0.000131596	-0.119492	-0.000536559	0.0504148	0.000351985	0.00738896	0.00296223	-0.246772	0.00289604	0.289864	-0.00157214	-1.19863	0.0353814	-0.296964	-0.000136737	-3.45176	1.60229
-0.276207	7.28609e-05	-5.71812	1.64556	-0.0912457	-0.000209875	-0.735628	-0.000428167	0.0378428	-0.000888416	-0.0983754	-0.000265769	0.0991944	0.00236165	-0.0353686	0.00304779	0.24795	-0.000875348	-1.23726	0.0383379	-0.303739	-0.000315108	-3.37785	1.60487
-0.0613629	0.000516294	-3.99071	1.65033	-0.0207302	-0.000489671	0.818725	-0.00021836	0.166422	-0.000197528	-0.0683028	-0.00114697	0.171061	0.00183949	0.0826598	0.0033229	0.192581	-0.000136434	-1.23737	0.0409793	-0.310393	-0.000499563	-3.29845	1.60739
0.119826	0.00220911	-5.24278	1.65509	0.105055	0.000157049	-0.821373	-0.000338825	0.251533	0.000820107	0.240169	-0.00152893	0.205737	0.00126751	0.0927672	0.00376293	0.126178	0.00065386	-1.20308	0.0433308	-0.316926	-0.000689408	-3.21329	1.60987
-0.155047	0.00388201	-4.06238	1.66117	-0.0849745	0.0019284	0.0498363	9.07167e-06	0.249388	0.000864675	0.503683	-0.000887637	0.192734	0.000473798	0.0347937	0.00431103	0.0518248	0.00149908	-1.14695	0.0454288	-0.323337	-0.000883948	-3.12204	1.61231
-0.324913	-0.00115828	-3.30023	1.66725	-0.0216428	-0.00176613	0.841208	-3.84381e-05	0.142757	-0.000122001	0.414393	0.00044643	0.137648	-0.00057413	-0.027789	0.00478943	-0.0268249	0.00238647	-1.08643	0.0473267	-0.329627	-0.00108249	-3.02436	1.61473
-0.352877	-0.00047144	-4.28634	1.67333	0.273666	-0.000168732	0.284709	0.000581043	-0.0319716	-0.000607993	-0.144881	0.00154784	0.0584609	-0.00170535	-0.0240709	0.00498369	-0.105731	0.00329497	-1.03942	0.0490943	-0.335796	-0.00128433	-2.91995	1.61713
-1.25965	0.000234418	-5.78823	1.67597	-0.345788	0.000428489	-0.971774	-0.000563145	-0.173813	-0.000223205	-0.639868	0.00149354	-0.0238412	-0.00268433	0.107389	0.00470685	-0.18071	0.00420226	-1.01875	0.0508225	-0.341844	-0.00148879	-2.80862	1.61951
-1.21588	0.000189773	-4.33452	1.67861	-0.1822	0.000210467	-0.0498854	-0.000210638	-0.174682	-5.15513e-05	-0.504282	0.000384376	-0.0898822	-0.0033611	0.392293	0.00391587	-0.247542	0.00508712	-1.02347	0.0526215	-0.34777	-0.00169517	-2.69065	1.6219
-0.772301	-0.000382264	-2.59834	1.68125	0.235472	0.000125211	0.625378	0.000318988	-0.0721534	-0.000837993	0.0704323	-0.000715222	-0.127995	-0.00369854	0.766559	0.00272743	-0.301976	0.00593182	-1.04487	0.054616	-0.353575	-0.00190276	-2.56672	1.62431
-0.568546	-0.0013346	-2.6827	1.68389	0.405746	-4.8296e-05	-0.446446	0.000228501	-0.00967435	-0.00214006	0.578135	-0.00132693	-0.136987	-0.00375235	1.12546	0.00130379	-0.339773	0.00671699	-1.07301	0.0569472	-0.359258	-0.00211089	-2.43759	1.62674
-0.934685	-0.0017758	-1.25249	1.68653	0.0400837	-0.00036943	0.647555	-0.000917121	-0.0221828	-0.00295644	0.536276	-0.00131262	-0.126704	-0.00354709	1.36543	-0.000222309	-0.357547	0.007416	-1.09793	0.0597626	-0.364821	-0.00231884	-2.30402	1.62922
-1.34929	-0.000450099	-2.51989	1.69322	-0.461458	9.48435e-05	-0.453082	0.000535502	0.0277844	-0.00297497	0.154797	-0.000481574	-0.114278	-0.00303994	1.41674	-0.00180662	-0.35407	0.0079959	-1.10995	0.0632085	-0.370265	-0.00252594	-2.16678	1.63177
-0.304042	0.00128306	-2.67316	1.69991	0.371476	0.000597041	-0.376759	0.000662589	0.187813	-0.00284687	-0.11817	0.000923214	-0.108676	-0.00215667	1.26512	-0.00347217	-0.329682	0.00842103	-1.10119	0.0674065	-0.375593	-0.00273148	-2.02662	1.63439
-0.597303	0.00154521	-2.041	1.7066	-0.0476911	-0.00025579	0.469299	9.09168e-05	0.243596	-0.00302847	-0.236667	0.00214373	-0.105148	-0.000891141	0.940458	-0.00518268	-0.286256	0.00865538	-1.06732	0.0724396	-0.380809	-0.00293477	-1.88429	1.63711
-0.693931	0.0028081	-2.57814	1.7133	-0.101927	-7.05525e-05	0.32009	-0.000932684	0.108977	-0.00327361	-0.444765	0.00267058	-0.096117	0.000624436	0.497568	-0.00673241	-0.226744	0.00866292	-1.00709	0.0783579	-0.38592	-0.00313509	-1.74059	1.63993
-0.709613	0.00475111	-3.76316	1.72244	0.00339949	0.000989613	-0.496106	0.000137501	-0.12686	-0.00342179	-0.580754	0.00198297	-0.0771609	0.00210735	-0.0306806	-0.00770233	-0.154706	0.00840756	-0.920094	0.0851697	-0.390928	-0.00333162	-1.59632	1.64285
-0.553042	0.00341302	-3.2959	1.73158	0.24712	-0.00107071	-0.0837902	0.00105465	-0.349692	-0.00304623	-0.267016	-0.000614501	-0.0456906	0.0032002	-0.615713	-0.00752709	-0.0741225	0.00785323	-0.80588	0.0928118	-0.39584	-0.00352346	-1.45234	1.64586
-0.813638	0.00855149	-2.61585	1.74072	-0.106102	0.00211848	0.21919	0.00097111	-0.40885	-0.000467998	0.334185	-0.00462876	-0.00191722	0.00363825	-1.19537	-0.00567662	0.0108279	0.00697242	-0.663808	0.101132	-0.40066	-0.00370967	-1.30955	1.64892
-0.787898	0.00966478	-2.28772	1.74987	-0.473602	-0.00111585	0.291026	-0.00310922	-0.173323	0.0054684	0.709593	-0.00696117	0.0485846	0.00342261	-1.69778	-0.00198324	0.0959056	0.00577896	-0.493045	0.109899	-0.405391	-0.00388934	-1.16889	1.65202
-0.0487767	0.00583215	-3.20432	1.77211	-0.345341	-0.0103818	-0.612475	0.000117356	0.289572	0.0132861	0.652056	-0.00510953	0.0947121	0.0026613	-2.06293	0.00317644	0.176898	0.00432809	-0.292572	0.11883	-0.410039	-0.00406155	-1.03138	1.6551
1.29524	0.00781806	-3.23321	1.79436	0.614494	-0.0131349	-0.578868	-0.00074267	0.55238	0.0210211	0.336598	0.000501017	0.124098	0.00147101	-2.24411	0.00886489	0.249689	0.00268624	-0.0616008	0.127627	-0.414609	-0.00422538	-0.897995	1.65811
-0.0900683	0.0083278	-2.63337	1.8166	-0.547519	-0.0119182	-0.00564132	-0.000994111	0.247006	0.02372	-0.145608	0.00671016	0.128143	-1.47744e-05	-2.1886	0.0138874	0.310536	0.000920631	0.197001	0.135998	-0.419103	-0.0043799	-0.769748	1.661
0.27405	0.00822416	-1.13425	1.83885	0.288344	0.00136945	1.40825	0.00516866	-0.271427	0.0138508	-0.859838	0.00917383	0.11389	-0.00157038	-1.84736	0.0171079	0.356657	-0.000901533	0.471491	0.143665	-0.423528	-0.00452421	-0.647637	1.66373
-0.208321	0.00926931	0.264891	1.83883	0.0891611	0.0275738	2.21295	-0.0015872	-0.574024	-0.00806945	-1.35757	0.00598241	0.0916295	-0.00286467	-1.20141	0.0177984	0.386236	-0.00271304	0.747483	0.15038	-0.427887	-0.00465737	-0.532665	1.66626
-0.490973	-0.0711246	-2.55647	1.83881	-0.151501	-0.0293413	-2.55828	-0.00183364	-0.616164	-0.0290136	-0.734599	0.000173222	0.0702413	-0.00354456	-0.291667	0.015997	0.398772	-0.00444668	1.01045	0.155936	-0.432186	-0.00477847	-0.425835	1.66854
-0.23535	-0.0154091	5.49038	1.8388	-0.0333006	0.0285985	2.39773	-0.000413339	-0.466583	-0.0297787	0.977044	-0.00400817	0.0561421	-0.0033072	0.716487	0.0124783	0.395095	-0.00603512	1.24588	0.160184	-0.436426	-0.00488659	-0.328154	1.67056
0.110562	-0.00393167	3.23373	1.83878	0.125113	0.0246247	-1.64797	0.000428273	-0.258895	-0.0140151	1.5473	-0.0052883	0.0519785	-0.00215025	1.62738	0.00832982	0.376886	-0.00741023	1.43925	0.163027	-0.440608	-0.00498081	-0.240629	1.67228
0.223084	-0.00152608	3.63109	1.83876	0.0969093	0.00506504	-1.12684	0.000434198	-0.0912673	0.00749108	0.558213	-0.00441085	0.056287	-0.000516085	2.26502	0.00460929	0.346752	-0.00850592	1.57602	0.16442	-0.444725	-0.0050602	-0.164268	1.67371
-0.0536881	0.00361752	4.48071	1.83875	-0.324328	-0.00678389	0.670669	-2.73888e-05	0.0900414	0.0237276	-0.793202	-0.00255791	0.061854	0.00106508	2.53812	0.00212843	0.30846	-0.00926743	1.64169	0.164369	-0.448771	-0.00512385	-0.100077	1.67483
0.528111	-0.00513252	4.16368	1.83873	0.0594577	-0.0247033	1.10786	-0.000290852	0.33921	0.0323186	-1.42525	-0.000857093	0.0598755	0.00206601	2.39536	0.00129971	0.266223	-0.00964298	1.62574	0.162921	-0.452738	-0.00517084	-0.0488674	1.67566
1.05035	0.000201506	2.26396	1.83871	0.408728	-0.0182071	-0.52518	-0.00012061	0.580169	0.0311225	-1.03331	0.000381252	0.0438952	0.00208305	1.82057	0.00210676	0.223746	-0.00959637	1.53366	0.160157	-0.456618	-0.00520049	-0.0106783	1.67619
