# Supplementary material for: Macroeconomic Imbalances and Financial Stress Among BRICS: Analysis of Frequency-Dependent and Asymmetric Causal Nexuses
Source: publisher site journal article supplement (doi:10.1515/snde-2024-0045), 2025-04-16
Supplement: Supplementary file 45 [file IMF1-Brazil.xlsx]

## Sheet: CA
-7.12389	-7.12389	-7.12389	-7.12389	-7.12389	-7.12389	-7.12389	-7.12389	-7.12389	-7.12389	-0.0310445	-0.0310445	-0.0310445	-0.0310445	-0.0310445	-0.0310445	-0.0310445	-0.0310445	-0.0310445
4.2429	4.2429	4.2429	4.2429	4.2429	4.2429	4.2429	4.2429	4.2429	4.2429	-0.0310445	-0.0310445	-0.0310445	-0.0310445	-0.0310445	-0.0310445	-0.0310445	-0.0310445	-0.0310445
-0.656215	-0.540204	-0.540204	3.39287	3.12956	3.12956	3.12956	3.12956	3.12956	3.12956	3.12956	3.12956	3.12956	3.12956	3.12956	3.12956	3.12956	3.12956	2.08105
-1.83592	-1.83592	-1.83592	-1.83592	-1.78439	-1.78439	-1.78439	-2.47808	-5.78216	-19.1716	-13.1501	-13.1501	-13.1501	-13.1501	-13.1501	-13.1501	-9.4321	-9.4321	-9.4321
-4.82439	-4.82439	-4.82439	-4.82439	-4.82439	-4.82439	-5.78216	-5.78216	-5.78216	-5.78216	-5.78216	-13.1501	-13.1501	-9.4321	-9.4321	-9.4321	-9.4321	-6.17533	-6.17533
1.66888	3.3226	3.3226	3.3226	2.34404	0.833429	-1.26054	-1.26054	0.50006	0.50006	0.50006	0.50006	0.50006	0.0643934	0.679403	1.51216	1.51216	-3.0806	-3.0806
1.56321	1.66888	0.833429	2.34404	2.34404	2.34404	2.34404	1.89507	3.27936	3.27936	4.5131	4.5131	4.5131	4.5131	1.99858	2.78389	2.78389	2.21346	2.21346
-0.0804924	-0.818012	-0.217337	-0.521602	-2.06818	-2.06818	-2.06818	-2.06818	-2.06818	-1.08456	-1.08456	-1.91353	-1.91353	-1.91353	-1.91353	-1.91353	-2.21525	0.187875	0.499108
1.38103	1.38103	1.38103	-0.217337	-0.521602	-0.521602	-0.521602	0.333511	0.333511	0.367108	0.876504	1.08538	3.09939	3.09939	1.78657	1.89507	1.89507	1.24625	0.672003
1.38103	2.36006	2.36006	2.2925	2.2925	2.2925	2.2925	2.64388	1.12005	1.12005	3.09939	3.09939	3.09939	1.89507	1.89507	1.73489	1.50177	1.50177	1.50177
1.06036	1.08132	1.02113	0.55698	0.758205	0.758205	0.97259	-0.0358988	-0.0358988	-0.0358988	-0.0358988	-0.780114	-0.780114	-0.780114	-0.482495	-0.482495	1.50177	1.50177	1.50177
-1.28204	-0.546139	-0.546139	-0.546139	0.300869	-0.253654	-0.253654	-0.253654	-0.0358988	-0.893011	-0.935849	-1.13259	-1.13259	-0.286411	-0.482495	-0.482495	-3.20167	-3.20167	-3.20167
-2.09026	-3.27686	-3.27686	-3.50099	-3.32583	-3.32583	-3.32583	-2.04313	-0.893011	-0.893011	-0.893011	-1.17585	-1.17585	0.461608	-0.286411	-0.286411	-0.0736313	-1.52297	-1.96669
-3.27686	-3.27686	-3.27686	-3.50099	-3.61113	-0.546139	0.247298	0.247298	2.45745	1.15897	1.15897	0.900539	0.900539	0.634724	1.39828	1.39828	0.850078	0.241673	0.241673
-2.08616	-2.08616	-2.08616	-2.08616	-0.0546924	-0.60614	0.247298	-0.103377	-0.975125	-0.975125	-1.91766	-1.91766	-1.52297	-1.52297	-1.39051	-0.121226	-0.121226	-0.121226	-0.121226
-2.08616	-2.08616	-2.08616	-4.56452	-2.6439	-2.6439	-2.87821	-2.87821	-2.87821	-2.06784	-2.06784	-1.91766	-1.91766	-1.39051	0.203583	0.20282	-0.121226	-0.121226	-0.121226
3.96132	3.96132	4.87273	4.87273	4.87273	1.07999	1.07999	1.07999	1.07999	1.65229	0.606032	-0.99446	-0.99446	-0.99446	-0.99446	-1.61079	-1.61079	-1.61079	-1.53658
3.96132	3.96132	3.96132	0.747716	0.747716	0.747716	0.606032	0.606032	0.606032	0.606032	0.606032	0.606032	0.606032	0.606032	0.606032	0.606032	-0.376861	-1.53658	-1.53658
0.747716	0.184748	0.184748	0.184748	0.184748	0.184748	0.184748	0.184748	-0.45747	-1.08912	-1.08912	-1.08912	-1.08912	-1.08912	-1.08912	-1.08912	-1.08912	-1.08912	-1.08912
	QQR	QR
0.05	-3.76412	-0.680077
0.1	2.2184	-0.341605
0.15	2.50269	-0.013208
0.2	-7.75397	-0.00257977
0.25	-7.06507	0.0676453
0.3	0.652646	0.0800853
0.35	2.73374	0.0613941
0.4	-1.3286	0.0365749
0.45	1.00267	-0.0445035
0.5	2.07808	-0.027631
0.55	0.382378	-0.154826
0.6	-0.96668	-0.196288
0.65	-1.73004	-0.179411
0.7	-0.297529	-0.155098
0.75	-1.02992	-0.050559
0.8	-1.79285	-0.0241168
0.85	0.988018	-0.0215314
0.9	0.880915	-0.149764
0.95	-0.489881	-0.663578

## Sheet: CGD
14.262	27.5046	23.0875	5.68267	12.6083	-0.925139	-18.9679	-7.36871	-12.4472	-14.4721	-12.1072	-10.9126	-9.7007	-6.92091	-5.82983	-9.97112	-12.2724	-18.7201	-0.894062
14.262	27.5046	23.0875	5.68267	12.6083	-0.925139	-18.9679	-7.36871	-12.4472	-14.4721	-12.1072	-10.9126	-9.7007	-6.92091	-5.82983	-9.97112	-12.2724	-18.7201	-0.894062
14.262	27.5046	23.0875	5.68267	12.6083	-0.925139	-11.6517	-7.36871	-12.4472	-14.4721	-12.1072	-10.9126	-9.7007	-6.92091	-5.82983	-9.97112	-12.2724	-18.7201	-0.894062
14.262	27.5046	23.0875	5.68267	12.6083	-0.925139	-11.6517	-7.36871	-12.4472	-14.4721	-12.1072	-10.9126	-9.7007	-6.92091	-5.82983	-9.97112	-12.2724	-18.7201	-0.894062
14.262	27.5046	23.0875	5.68267	12.6083	-0.925139	-11.6517	-2.47062	-12.4472	-14.4721	-12.1072	-10.9126	-9.7007	-6.92091	-5.82983	-9.97112	-12.2724	-18.7201	-0.894062
14.262	27.5046	23.0875	5.68267	12.6083	1.79566	-11.6517	-2.47062	-12.4472	-14.4721	-12.1072	-10.9126	-9.7007	-6.92091	-5.82983	-9.97112	-12.2724	-18.7201	-0.894062
14.262	27.5046	23.0875	5.68267	12.6083	1.79566	-11.6517	-2.47062	-12.4472	-14.4721	-12.1072	-10.9126	-9.7007	-6.92091	-5.82983	-9.97112	-12.2724	-18.7201	-0.894062
14.262	27.5046	23.0875	5.68267	12.6083	1.79566	-11.6517	-2.47062	-12.4472	-14.4721	-12.1072	-10.9126	-9.7007	-6.92091	-5.82983	-9.97112	-12.2724	-18.7201	-0.894062
14.262	27.5046	23.0875	5.68267	12.6083	11.4486	-3.43129	-2.47062	-12.4472	-14.4721	-12.1072	-10.9126	-9.7007	-6.92091	-5.82983	-9.97112	-12.2724	-18.7201	-0.894062
14.262	27.5046	23.0875	5.68267	12.6083	11.4486	-3.43129	-1.03042	-12.4472	-14.4721	-12.1072	-10.9126	-9.7007	-6.92091	-5.82983	-9.97112	-12.2724	-18.7201	-0.894062
14.262	27.5046	23.0875	5.68267	12.6083	11.4486	-3.43129	-1.03042	-12.4472	-14.4721	-12.1072	-10.9126	-9.7007	-6.92091	-5.82983	-9.97112	-12.2724	-18.7201	-0.894062
14.262	27.5046	23.0875	5.68267	12.6083	11.4486	-3.43129	-1.03042	-12.4472	-14.4721	-12.1072	-10.9126	-9.7007	-6.92091	-5.82983	-9.97112	-12.2724	-18.7201	-0.894062
14.262	27.5046	23.0875	5.68267	12.6083	11.4486	-3.43129	-1.03042	-12.4472	-14.4721	-12.1072	-10.9126	-9.7007	-6.92091	-5.82983	-9.97112	-12.2724	-18.7201	-0.894062
14.262	27.5046	23.0875	5.68267	12.6083	11.4486	-3.43129	-1.03042	-12.4472	-14.4721	-12.1072	-10.9126	-9.7007	-6.92091	-5.82983	-9.97112	-12.2724	-18.7201	-0.894062
14.262	27.5046	23.0875	5.68267	12.6083	11.4486	-3.43129	-1.03042	-12.4472	-14.4721	-12.1072	-10.9126	-9.7007	-6.92091	-5.82983	-9.97112	-12.2724	-18.7201	-0.894062
14.262	27.5046	23.0875	5.68267	12.6083	11.4486	-3.43129	-1.03042	-12.4472	-14.4721	-12.1072	-10.9126	-9.7007	-6.92091	-5.82983	-9.97112	-12.2724	-18.7201	-0.894062
14.262	27.5046	23.0875	5.68267	12.6083	11.4486	-3.43129	-1.03042	-12.4472	-14.4721	-12.1072	-10.9126	-9.7007	-6.92091	-5.82983	-9.97112	-12.2724	-18.7201	-0.894062
14.262	27.5046	23.0875	5.68267	12.6083	11.4486	-3.43129	-1.03042	-12.4472	-14.4721	-12.1072	-10.9126	-9.7007	-6.92091	-5.82983	-9.97112	-12.2724	-18.7201	-0.894062
14.262	27.5046	23.0875	5.68267	12.6083	11.4486	-3.43129	-1.03042	-12.4472	-14.4721	-12.1072	-10.9126	-9.7007	-6.92091	-5.82983	-9.97112	-12.2724	-18.7201	-0.894062
	QQR	QR
0.05	-3.07183	14.262
0.1	-3.07183	27.5046
0.15	-2.68677	23.0875
0.2	-2.68677	5.68267
0.25	-2.42897	12.6083
0.3	-2.28577	11.4486
0.35	-2.28577	-3.43129
0.4	-2.28577	-2.47062
0.45	-1.34507	-12.4472
0.5	-1.26927	-14.4721
0.55	-1.26927	-12.1072
0.6	-1.26927	-10.9126
0.65	-1.26927	-9.7007
0.7	-1.26927	-6.92091
0.75	-1.26927	-5.82983
0.8	-1.26927	-9.97112
0.85	-1.26927	-12.2724
0.9	-1.26927	-18.7201
0.95	-1.26927	-0.894062

## Sheet: OGAP
-15.7554	-10.9465	-7.65111	-3.14485	-1.41217	-4.25635	-3.79781	-2.77286	-2.83929	-0.956746	-0.0528983	-1.483	-2.77555	1.52598	6.29157	9.33415	8.62173	6.51521	-2.01219
-15.7554	-10.9465	-7.65111	-3.14485	-1.41217	-4.25635	-3.79781	-2.77286	-2.83929	-0.956746	-0.0528983	-1.483	-2.77555	0.0190727	6.29157	9.33415	8.62173	6.51521	-2.01219
-15.7554	-10.9465	-7.65111	-3.14485	-1.41217	-4.25635	-3.79781	-2.77286	-2.83929	-0.956746	-0.0528983	-1.483	-2.77555	0.0190727	6.29157	9.33415	8.62173	6.51521	-2.01219
-15.7554	-10.9465	-7.65111	-3.14485	-1.41217	-4.25635	-3.79781	-4.96707	-2.83929	-0.956746	-0.0528983	-1.483	-2.77555	0.0190727	6.29157	9.33415	8.62173	6.51521	-2.01219
-15.7554	-10.9465	-7.65111	-3.14485	-1.41217	-4.25635	-3.79781	-4.96707	-2.83929	-0.956746	-0.0528983	-1.483	-2.77555	0.0190727	6.29157	9.33415	8.62173	6.51521	-2.01219
-15.7554	-10.9465	-7.65111	-3.14485	-1.41217	-4.25635	-3.79781	-4.96707	-2.83929	-0.956746	-0.0528983	-1.483	-2.77555	0.0190727	6.29157	9.33415	8.62173	6.51521	-2.01219
-15.7554	-10.9465	-7.65111	-3.14485	-1.41217	-4.25635	-3.79781	-4.96707	-2.83929	-0.956746	-0.0528983	-1.483	-2.77555	0.0190727	6.29157	9.33415	8.62173	6.51521	-2.01219
-15.7554	-10.9465	-7.65111	-3.14485	-1.41217	-4.25635	-3.79781	-4.96707	-2.83929	-0.956746	-0.0528983	-1.483	-2.77555	0.0190727	6.29157	9.33415	8.62173	6.51521	-2.01219
-15.7554	-10.9465	-7.65111	-3.14485	-1.41217	-4.25635	-3.79781	-4.96707	-2.83929	-0.956746	-0.0528983	-1.483	-2.77555	0.0190727	6.29157	9.33415	8.62173	6.51521	-2.01219
-15.7554	-10.9465	-7.65111	-3.14485	-1.41217	-4.25635	-3.79781	-4.96707	-2.83929	-0.956746	-0.0528983	-1.483	-2.77555	0.0190727	6.29157	9.33415	8.62173	6.51521	-2.01219
-15.7554	-10.9465	-7.65111	-3.14485	-1.41217	-2.42168	-3.79781	-4.96707	-2.83929	-0.956746	-0.0528983	-1.483	-2.77555	0.0190727	6.29157	9.33415	8.62173	6.51521	-2.01219
-15.7554	-10.9465	-7.65111	-3.14485	-1.41217	-2.42168	-3.79781	-4.96707	-2.83929	-0.956746	-0.0528983	-1.483	-2.77555	0.0190727	6.29157	9.33415	8.62173	6.51521	-2.01219
-15.7554	-10.9465	-7.65111	-3.14485	-1.41217	-2.42168	-3.79781	-4.96707	-2.83929	-0.956746	-0.0528983	-1.483	-2.77555	0.0190727	6.29157	9.33415	8.62173	6.51521	-2.01219
-15.7554	-10.9465	-7.65111	-3.14485	-1.41217	-2.42168	-3.79781	-4.96707	-2.83929	-0.956746	-0.0528983	-1.483	-2.77555	0.0190727	6.29157	9.33415	8.62173	6.51521	-2.01219
2.91984	-10.9465	-7.65111	-3.14485	-1.41217	-2.42168	-3.79781	-4.96707	-2.83929	-0.956746	-0.0528983	-1.483	-2.77555	0.0190727	6.29157	9.33415	8.62173	6.51521	-2.01219
2.91984	-10.9465	-6.97014	-2.81077	-1.41217	-2.42168	-3.79781	-4.96707	-2.83929	-0.956746	-0.0528983	-1.483	-2.77555	0.0190727	6.29157	9.33415	8.62173	6.51521	-2.01219
2.91984	-10.9465	-6.97014	-2.81077	-1.41217	-2.42168	-3.79781	-4.96707	-2.83929	-0.956746	-0.0528983	-1.483	-2.77555	0.0190727	6.29157	9.33415	8.62173	6.51521	-2.01219
2.91984	-10.9465	-6.97014	-2.81077	-1.41217	-2.42168	-3.79781	-4.96707	-2.83929	-0.956746	-0.0528983	-1.483	-2.77555	0.0190727	6.29157	9.33415	8.62173	6.51521	-2.01219
2.91984	-10.9465	-6.97014	-2.81077	-1.41217	-2.42168	-3.79781	-4.96707	-2.83929	-0.956746	-0.0528983	-1.483	-2.77555	0.0190727	6.29157	9.33415	8.62173	6.51521	-2.01219
	QQR	QR
0.05	-1.45095	-15.7554
0.1	-1.53026	-10.9465
0.15	-1.53026	-7.65111
0.2	-1.64575	-3.14485
0.25	-1.64575	-1.41217
0.3	-1.64575	-2.42168
0.35	-1.64575	-3.79781
0.4	-1.64575	-4.96707
0.45	-1.64575	-2.83929
0.5	-1.64575	-0.956746
0.55	-1.54919	-0.0528983
0.6	-1.54919	-1.483
0.65	-1.54919	-2.77555
0.7	-1.54919	0.0190727
0.75	-0.566278	6.29157
0.8	-0.512854	9.33415
0.85	-0.512854	8.62173
0.9	-0.512854	6.51521
0.95	-0.512854	-2.01219
