# Supplementary material for: Macroeconomic Imbalances and Financial Stress Among BRICS: Analysis of Frequency-Dependent and Asymmetric Causal Nexuses
Source: publisher site journal article supplement (doi:10.1515/snde-2024-0045), 2025-04-16
Supplement: Supplementary file 46 [file IMF2-Brazil.xlsx]

## Sheet: CA
-4.08914	-4.08914	-4.08914	-4.08914	-4.08914	-4.08914	-4.08914	-4.08914	-1.61823	-1.61823	-1.61823	-0.148986	-0.148986	-0.148986	-0.148986	0.45477	0.45477	0.45477	0.45477
-0.478302	-0.478302	-0.478302	-0.478302	-0.478302	-0.478302	-0.478302	0.00386079	0.00386079	0.00386079	0.00386079	0.00386079	0.00386079	-0.0621483	0.45477	0.45477	0.45477	0.45477	0.45477
-0.264532	-0.934494	-1.1892	-0.457442	-0.457442	-0.457442	-0.457442	-0.457442	-0.457442	-0.457442	-0.457442	-0.457442	-0.457442	-0.457442	-0.457442	-0.457442	-0.457442	-0.457442	-0.457442
-7.51633	-7.51633	-7.51633	-5.32029	-12.7165	-12.7165	-12.7165	-5.16629	-5.16629	-5.16629	-5.16629	-5.16629	-2.08085	0.604846	0.109318	-2.89305	-2.89305	-2.89305	-2.89305
0.501638	0.501638	0.501638	-2.39357	0.218909	-1.52509	-1.12299	-1.12299	-0.143631	-1.74388	-1.74388	-2.6387	-3.71116	-2.94747	-2.94747	-2.98285	-2.98285	-2.98285	-2.98285
2.67479	3.28709	3.28709	0.477342	0.477342	1.95663	1.95663	1.95663	1.72099	1.72099	1.00769	1.00769	1.7518	1.7518	0.623093	1.96446	1.96446	1.43332	1.43332
0.3306	0.432155	0.717535	1.14505	0.522665	0.898992	1.05079	1.70103	1.62595	1.62595	-1.60375	-1.9239	-1.9239	-1.63372	-1.23954	-1.86799	-2.40415	-2.63326	-2.63326
0.631598	0.800235	0.445396	0.43392	1.5262	0.93335	0.758469	1.62014	0.712437	0.712437	-0.226319	-0.226319	-1.1526	-0.84898	-0.84898	-1.50087	-1.11972	-1.11972	-0.812295
-0.904772	-0.6759	-0.6759	0.0385446	-0.411472	0.173641	0.173641	0.173641	0.893081	0.81342	1.3855	1.5015	1.30232	1.39879	1.97925	1.87125	1.87125	3.81234	2.19517
-1.01007	-0.775819	-0.775819	-0.26326	-1.07068	-1.07068	-0.981799	-3.35386	-2.51438	-2.51438	-3.22544	-3.5945	-1.3229	-1.3229	-1.32365	-1.4554	-1.42389	-1.84128	-1.57599
-1.50618	-1.49583	-0.537747	-0.537747	-0.22027	-0.914918	1.12569	0.970278	0.951594	-0.456158	-0.456158	-0.502084	-0.502084	-0.614904	-0.614904	0.112451	1.12369	1.19152	-0.418737
-1.08156	-1.08156	-0.901607	-1.62266	-1.52225	-1.52225	-1.52225	-0.55226	-0.665064	-0.665064	-0.680191	-0.680191	-0.738695	-2.07588	-2.07588	-2.07588	-0.662274	2.27548	2.27548
0.654441	0.654441	-1.48609	-2.30656	-2.18996	-1.81544	-2.81814	-2.81814	-2.81814	-3.03995	-0.284634	-0.284634	1.29675	1.29675	0.0157473	1.21641	1.21641	-0.539377	-2.35361
-1.40146	-1.40146	-1.40146	-1.48609	-1.48609	-1.48609	5.18798	5.18798	3.5121	2.87067	2.70456	2.70456	2.00234	2.00234	2.00234	2.00234	2.00234	1.48206	0.845287
0.420407	0.420407	0.420407	0.420407	0.420407	0.420407	0.420407	0.420407	-2.509	-3.58738	-3.58738	-3.58738	-3.58738	-3.58738	-1.13057	-1.42116	-1.42116	-1.42116	-1.42116
12.5483	12.5483	12.5483	12.5483	12.5483	12.5483	12.5483	12.5483	12.5483	12.5483	12.5483	7.16521	7.16521	7.16521	7.16521	7.16521	7.16521	7.16521	7.16521
1.98429	1.98429	-1.51864	-1.51864	-1.51864	-1.51864	-1.51864	-8.37166	-8.37166	-8.37166	-8.37166	-8.37166	-8.37166	-8.37166	-8.37166	-8.37166	-8.37166	-8.37166	-8.37166
-1.03202	-1.03202	-1.03202	-1.03202	-1.03202	-1.03202	-1.03202	-1.03202	-1.03202	-1.03202	-1.03202	-1.03202	-1.03202	-1.03202	-1.03202	-1.03202	-1.03202	-1.03202	-1.03202
-1.03202	-1.03202	-1.03202	-1.03202	-1.03202	-1.03202	-1.03202	-1.03202	-1.03202	-1.03202	-1.03202	-1.03202	-1.03202	-1.03202	-1.03202	-1.03202	-1.03202	-1.03202	-1.03202
	QQR	QR
0.05	-1.91288	0.0605601
0.1	-0.058592	-0.142486
0.15	-0.51091	-0.190518
0.2	-5.51521	-0.213087
0.25	-1.69729	-0.277521
0.3	1.70806	-0.218323
0.35	-0.411197	-0.259156
0.4	0.037809	-0.399305
0.45	0.890278	-0.38912
0.5	-1.65351	-0.346313
0.55	-0.173816	-0.308195
0.6	-0.819714	-0.31499
0.65	-0.863354	-0.356391
0.7	1.36022	-0.345024
0.75	-1.25778	-0.284962
0.8	10.2818	-0.256681
0.85	-5.47813	-0.173056
0.9	-1.03202	-0.112579
0.95	-1.03202	-0.0366351

## Sheet: CGD
-7.01438	-4.49932	-10.9944	-4.20172	-6.58621	-9.72518	-11.152	-8.17462	-11.5161	-13.5676	-8.13917	-10.98	-7.80849	-4.06799	-1.44648	1.30569	3.90824	8.90818	1.71417
-7.01438	-4.49932	-10.9944	-4.20172	-6.58621	-9.72518	-11.152	-8.17462	-11.5161	-13.5676	-8.13917	-10.98	-7.80849	-4.06799	-1.44648	1.30569	3.90824	8.90818	1.71417
-7.01438	-4.49932	-10.9944	-4.20172	-6.00778	-9.72518	-11.152	-8.17462	-11.5161	-13.5676	-8.13917	-10.98	-7.80849	-4.06799	-1.44648	1.30569	3.90824	8.90818	1.71417
-7.01438	-4.49932	-10.9944	-4.20172	-6.00778	-9.72518	-11.152	-8.17462	-11.5161	-13.5676	-8.13917	-10.98	-7.80849	-4.06799	-1.44648	1.30569	3.90824	8.90818	1.71417
-7.01438	-4.49932	-10.9944	-4.20172	-6.00778	-9.72518	-11.152	-8.17462	-11.5161	-13.5676	-8.13917	-10.98	-7.80849	-4.06799	-1.44648	1.30569	3.90824	8.90818	1.71417
-7.01438	-4.49932	-10.9944	-4.20172	-5.57379	-9.72518	-11.152	-8.17462	-11.5161	-13.5676	-8.13917	-10.98	-7.80849	-4.06799	-1.44648	1.30569	3.90824	8.90818	1.71417
-7.01438	-4.49932	-10.9944	-4.20172	-5.57379	-9.72518	-11.152	-8.17462	-11.5161	-13.5676	-8.13917	-10.98	-7.80849	-4.06799	-1.44648	1.30569	3.90824	8.90818	1.71417
-7.01438	-4.49932	-10.9944	-4.20172	-5.57379	-9.72518	-10.7638	-8.17462	-11.5161	-13.5676	-8.13917	-10.98	-7.80849	-4.06799	-1.44648	1.30569	3.90824	8.90818	1.71417
-7.01438	-4.49932	-10.9944	-4.20172	-5.57379	-9.72518	-10.7638	-8.17462	-11.5161	-13.5676	-8.13917	-10.98	-7.80849	-4.06799	-1.44648	1.30569	3.90824	8.90818	1.71417
-7.01438	-4.49932	-10.9944	-4.20172	-5.57379	-9.72518	-10.7638	-8.17462	-11.5161	-13.5676	-8.13917	-10.98	-7.80849	-4.06799	-1.44648	1.30569	3.90824	8.90818	1.71417
-7.01438	-4.49932	-10.9944	-4.20172	-5.57379	-9.72518	-10.7638	-8.17462	-11.5161	-13.5676	-8.13917	-10.98	-7.80849	-4.06799	-1.44648	1.30569	3.90824	8.90818	1.71417
-7.01438	-4.49932	-10.9944	-4.20172	-5.57379	-9.72518	-10.7638	-8.17462	-11.5161	-13.5676	-8.13917	-10.98	-7.80849	-4.06799	-1.44648	1.30569	3.90824	8.90818	1.71417
-7.01438	-4.49932	-10.9944	-4.20172	-5.57379	-9.72518	-10.7638	-7.32211	-11.5161	-13.5676	-8.13917	-10.98	-7.80849	-4.06799	-1.44648	1.30569	-1.04335	8.90818	1.71417
-7.01438	-4.49932	-10.9944	-4.20172	-5.57379	-9.72518	-10.7638	-7.32211	-11.5161	-13.5676	-8.13917	-10.98	-7.80849	-4.06799	-1.44648	1.30569	-1.04335	8.90818	1.71417
-7.01438	-4.49932	-10.9944	-4.20172	-5.57379	-9.72518	-10.7638	-7.32211	-11.5161	-13.5676	-8.13917	-10.98	-7.80849	-4.06799	-1.44648	1.30569	-1.04335	8.90818	1.71417
-7.01438	-4.49932	-10.9944	-4.20172	-5.57379	-9.72518	-10.7638	-7.32211	-11.5161	-13.5676	-8.13917	-10.98	-7.80849	-4.06799	-1.44648	1.30569	-1.04335	8.90818	1.71417
-7.01438	-4.49932	-10.9944	-3.93687	-5.57379	-9.72518	-10.7638	-7.32211	-11.5161	-13.5676	-8.13917	-10.98	-7.80849	-4.06799	-1.44648	1.30569	-1.04335	8.90818	1.71417
-7.01438	-4.49932	-10.9944	-3.93687	-5.57379	-9.72518	-10.7638	-7.32211	-11.5161	-13.5676	-8.13917	-10.98	-7.80849	-4.06799	-1.44648	1.30569	-1.04335	8.90818	-4.53431
-7.01438	-4.49932	-10.9944	-3.93687	-5.57379	-9.72518	-10.7638	-7.32211	-11.5161	-13.5676	-8.13917	-10.98	-7.80849	-4.06799	-1.44648	1.30569	-1.04335	8.90818	-4.53431
	QQR	QR
0.05	-5.47565	-7.01438
0.1	-5.47565	-4.49932
0.15	-5.44521	-10.9944
0.2	-5.44521	-4.20172
0.25	-5.44521	-5.57379
0.3	-5.42237	-9.72518
0.35	-5.42237	-11.152
0.4	-5.40193	-8.17462
0.45	-5.40193	-11.5161
0.5	-5.40193	-13.5676
0.55	-5.40193	-8.13917
0.6	-5.40193	-10.98
0.65	-5.61767	-7.80849
0.7	-5.61767	-4.06799
0.75	-5.61767	-1.44648
0.8	-5.61767	1.30569
0.85	-5.60374	-1.04335
0.9	-5.9326	8.90818
0.95	-5.9326	1.71417

## Sheet: OGAP
-8.46813	4.70027	17.3075	17.6391	20.9254	17.4681	17.7395	19.0857	16.9477	25.7036	23.747	19.251	19.8707	17.6238	11.1484	11.785	10.2555	3.19556	2.34169
-8.46813	4.70027	17.3075	17.6391	20.9254	17.4681	17.7395	19.0857	16.9477	25.7036	23.747	19.251	19.8707	17.6238	11.9244	11.785	10.2555	3.19556	2.34169
-8.46813	4.70027	17.3075	17.6391	20.9254	17.4681	17.7395	19.0857	16.9477	25.7036	23.747	19.251	19.8707	17.6238	11.9244	11.785	10.2555	3.8565	2.34169
-8.46813	4.70027	17.3075	17.6391	20.9254	18.62	17.7395	19.0857	16.9477	25.7036	23.747	19.251	19.8707	17.6238	12.5178	11.785	10.2555	3.8565	2.34169
-8.46813	4.70027	17.3075	17.6391	20.9254	18.62	17.7395	19.0857	16.9477	25.7036	23.747	19.251	19.8707	17.6238	12.5178	11.785	10.2555	3.8565	2.34169
-8.46813	4.70027	17.3075	17.6391	20.9254	18.62	17.7395	19.0857	16.9477	25.7036	23.747	19.251	19.8707	17.6238	13.8156	11.785	10.2555	3.8565	2.34169
-8.46813	4.70027	17.3075	17.6391	20.9254	18.62	17.7395	19.0857	16.9477	25.7036	23.747	19.251	19.8707	17.6238	13.8156	11.785	10.2555	3.8565	2.34169
-8.46813	4.70027	17.3075	17.6391	20.9254	18.62	17.7395	19.0857	16.9477	25.7036	23.747	19.9101	19.8707	17.6238	13.8156	11.785	10.2555	3.8565	2.34169
-8.46813	4.70027	17.3075	17.6391	20.9254	18.62	17.7395	19.0857	16.9477	25.7036	23.747	19.9101	19.8707	17.6238	13.8156	11.785	10.2555	3.8565	2.34169
-8.46813	4.70027	17.3075	17.6391	20.9254	18.62	17.7395	19.3882	16.9477	25.7036	23.747	19.9101	19.8707	17.6238	13.8156	11.785	10.2555	3.8565	2.34169
-8.46813	4.70027	17.3075	17.6391	20.9254	18.62	17.7395	19.3882	16.9477	25.7036	23.747	19.9101	19.8707	17.6238	13.8156	11.785	10.2555	4.91802	2.34169
-8.46813	4.23111	17.3075	17.6391	20.9254	18.62	17.7395	19.3882	16.9477	25.7036	23.747	19.9101	19.8707	17.6238	13.8156	11.785	10.2555	4.91802	2.34169
-8.46813	4.23111	17.3075	17.6391	20.9254	18.62	17.7395	19.3882	16.9477	25.7036	23.747	19.9101	19.8707	17.6238	13.8156	11.785	10.2555	4.91802	2.34169
-8.46813	4.23111	17.3075	17.6391	20.9254	18.62	17.7395	19.3882	16.9477	25.7036	23.747	19.9101	19.8707	17.6238	13.8156	11.785	10.2555	4.91802	2.34169
-8.46813	4.23111	17.3075	17.6391	20.9254	18.62	17.7395	19.3882	16.9477	25.7036	23.747	19.9101	20.1136	17.6238	13.8156	11.785	10.2555	4.91802	2.34169
-8.46813	4.23111	17.3075	17.6391	20.9254	18.62	17.7395	19.3882	16.9477	25.7036	23.747	19.9101	20.1136	17.6238	13.8156	11.785	10.2555	4.91802	2.34169
-8.46813	4.23111	17.3075	17.6391	20.9254	18.62	17.7395	19.3882	16.9477	25.7036	23.747	19.9101	20.1136	17.6238	13.8156	11.785	10.2555	4.91802	2.34169
-8.46813	4.23111	17.3075	17.6391	20.9254	18.62	17.7395	19.3882	16.9477	25.7036	23.747	19.9101	20.1136	17.6238	13.8156	11.785	10.2555	4.91802	2.34169
-8.46813	4.23111	17.3075	17.6391	20.9254	18.62	17.7395	19.3882	16.9477	25.7036	23.747	19.9101	20.1136	17.6238	13.8156	11.785	10.2555	4.91802	2.34169
	QQR	QR
0.05	14.1193	-8.46813
0.1	14.1602	4.70027
0.15	14.195	17.3075
0.2	14.2868	17.6391
0.25	14.2868	20.9254
0.3	14.3551	17.4681
0.35	14.3551	17.7395
0.4	14.3898	19.0857
0.45	14.3898	16.9477
0.5	14.4057	25.7036
0.55	14.4616	23.747
0.6	14.4369	19.251
0.65	14.4369	19.8707
0.7	14.4369	17.6238
0.75	14.4497	13.8156
0.8	14.4497	11.785
0.85	14.4497	10.2555
0.9	14.4497	3.8565
0.95	14.4497	2.34169
