# Supplementary material for: Macroeconomic Imbalances and Financial Stress Among BRICS: Analysis of Frequency-Dependent and Asymmetric Causal Nexuses
Source: publisher site journal article supplement (doi:10.1515/snde-2024-0045), 2025-04-16
Supplement: Supplementary file 47 [file IMF3-Brazil.xlsx]

## Sheet: CA
0.186159	0.186159	0.186159	0.186159	0.186159	1.05037	1.05037	1.05037	1.05037	1.05037	1.05037	1.05037	1.05037	1.05037	1.05037	1.05037	1.05037	1.05037	1.05037
0.186159	0.186159	0.186159	0.186159	-1.01363	-1.01363	-1.01363	-1.01363	-1.01363	-1.01363	-1.01363	-1.01363	-1.01363	-1.01363	-1.01363	-1.01363	0.604016	0.604016	1.05037
-0.482868	-0.482868	-0.482868	-0.482868	14.9627	14.9627	14.9627	14.9627	14.9627	7.59597	0.627736	0.627736	0.627736	0.627736	0.627736	0.627736	0.627736	0.627736	0.627736
15.9893	15.9893	23.0875	23.0875	23.0875	11.5587	7.97414	7.97414	7.97414	7.97414	7.97414	7.97414	9.91941	9.91941	9.91941	9.91941	9.91941	9.91941	6.0183
-13.6711	-16.5805	-16.5805	-16.5805	-8.52238	-8.52238	-8.52238	-8.52238	-8.52238	-6.15008	-6.15008	-6.15008	-6.15008	-6.412	-6.412	-6.412	-6.412	-6.412	-6.412
0.367193	0.367193	0.367193	0.367193	0.367193	-8.85321	-8.85321	-8.85321	-8.85321	-8.85321	-8.85321	-3.20514	3.03104	3.03104	3.03104	3.03104	3.03104	3.03104	3.03104
5.57459	13.153	13.153	13.153	13.153	13.153	-2.45891	-7.37708	-7.37708	-7.37708	-13.0163	-13.0163	-13.0163	-13.0163	-13.0163	-13.0163	-13.0163	-13.0163	-6.91691
-8.72044	-8.72044	-8.72044	-8.72044	-8.72044	-8.86515	-8.86515	-2.45891	-2.45891	-2.45891	-2.42922	-2.08695	-2.08695	-2.08695	-2.08695	-2.08695	-1.03914	-1.03914	-1.48221
-1.43877	-1.43877	0.827594	1.04528	1.8149	2.09708	3.06503	3.07041	3.60983	3.60983	3.74336	1.36134	2.0444	1.30452	1.62486	2.36839	2.37744	-7.02173	-6.87417
0.896406	-0.121714	0.121382	0.121382	-0.873951	-1.03969	-0.774098	-0.919361	-1.83661	-1.56241	-1.66739	-1.66739	-1.66525	-0.738934	-0.148236	-0.732374	-0.989198	-0.926231	-0.926231
-2.60247	-2.60247	-4.69207	-4.12911	-2.81345	-3.49466	-4.94014	-5.02298	-4.35992	-4.91908	-4.35944	-4.38194	-4.38194	-5.13594	-4.53902	-0.765634	0.382597	-0.197006	-0.228107
-0.594569	-0.594569	-0.594569	-0.594569	-1.07518	-0.695691	-0.695691	-0.94861	-0.855242	-0.855242	-1.31227	-2.82139	-1.84928	-1.84928	-0.805756	-2.20115	-7.39199	-7.39199	-7.39199
3.97836	6.88885	6.88885	6.70382	6.70382	6.70382	6.75379	4.82427	4.82427	4.09988	4.67468	1.64409	0.895202	0.895202	0.895202	2.48748	2.48748	-0.972134	-0.972134
3.98268	3.98268	3.98268	5.6036	0.554705	-0.410823	-0.655403	-0.584347	-0.584347	-0.715669	-0.205693	0.020284	0.020284	0.057824	-0.0593112	-0.0593112	3.10532	3.10532	2.14182
0.0112634	0.0112634	0.0112634	0.0112634	0.0112634	-0.190032	-0.190032	-0.190032	0.324783	0.324783	0.324783	0.324783	0.100705	3.53642	3.53642	3.53642	1.56036	-0.331807	-0.331807
-2.8423	-2.8423	-2.8423	-2.8423	-2.8423	-2.8423	-0.312921	-0.312921	0.10409	-0.504619	-0.504619	-0.504619	-0.504619	1.59579	1.59579	1.59579	-1.62924	-1.62924	-1.62924
-1.27752	-1.27752	-1.27752	-0.298589	-0.298589	-0.298589	-0.298589	-0.67171	-0.67171	-0.622361	-0.622361	-0.622361	-0.622361	-0.622361	-1.16508	6.44686	6.44686	6.44686	6.44686
1.4901	1.4901	1.4901	1.4901	1.4901	1.4901	0.0263162	9.07754	9.13935	9.80065	11.5532	11.5532	11.5532	13.5566	11.7727	11.7727	11.7727	8.91296	8.91296
14.1748	10.0974	10.0974	3.20535	3.20535	3.20535	3.20535	4.09963	4.09963	4.09963	4.09963	0.091337	0.091337	0.091337	0.091337	0.091337	0.091337	0.091337	0.091337
	QQR	QR
0.05	0.822943	0.447856
0.1	-0.48213	0.446983
0.15	4.53304	0.457221
0.2	11.9042	0.48738
0.25	-8.89983	0.422427
0.3	-1.75111	0.202654
0.35	-3.38411	-0.0682056
0.4	-4.48072	-0.185658
0.45	0.90478	-0.277365
0.5	-0.813152	-0.267886
0.55	-3.32541	-0.279307
0.6	-2.13258	-0.289819
0.65	3.70552	-0.289506
0.7	1.22539	-0.228888
0.75	0.652214	-0.157891
0.8	-1.03655	-0.0651394
0.85	0.796854	-0.0201762
0.9	7.28129	0.203327
0.95	3.38527	0.0843708

## Sheet: CGD
53.4842	46.3615	37.8799	32.3792	21.8834	7.8363	12.8452	10.8912	15.2351	24.0682	24.4525	23.2871	19.889	14.8599	9.52606	6.30838	0.859617	11.5423	16.2516
53.4842	46.3615	37.8799	32.3792	21.8834	7.8363	12.8452	12.9576	15.2351	24.0682	24.4525	23.2871	19.889	14.8599	9.52606	6.30838	0.859617	11.5423	16.2516
53.4842	46.3615	37.8799	32.3792	21.8834	7.8363	12.8452	12.9576	15.2351	24.0682	24.4525	23.2871	19.889	14.8599	9.52606	6.30838	0.859617	11.5423	16.2516
53.4842	46.3615	37.8799	32.3792	21.8834	7.8363	12.8452	12.9576	15.2351	24.0682	24.4525	23.2871	19.889	14.8599	9.52606	6.30838	0.859617	11.5423	16.2516
53.4842	46.3615	37.8799	32.3792	21.8834	7.8363	12.8452	12.9576	15.2351	24.0682	24.4525	23.2871	19.889	14.8599	9.52606	6.30838	0.859617	11.5423	16.2516
53.4842	46.3615	37.8799	32.3792	21.8834	7.8363	12.8452	12.9576	15.2351	24.0682	24.4525	23.2871	19.889	14.8599	9.52606	6.30838	0.859617	11.5423	16.2516
53.4842	46.3615	37.8799	32.3792	21.8834	7.8363	12.8452	12.9576	15.2351	24.0682	24.4525	23.2871	19.889	14.8599	9.52606	6.30838	0.859617	11.5423	16.2516
53.4842	46.3615	37.8799	32.3792	21.8834	7.8363	12.8452	12.9576	15.2351	24.0682	24.4525	23.2871	19.889	14.8599	9.52606	6.30838	0.859617	11.5423	16.2516
53.4842	46.3615	37.8799	32.3792	21.8834	7.8363	12.8452	12.9576	15.2351	24.0682	24.4525	23.2871	19.889	14.8599	9.52606	6.30838	0.859617	11.5423	16.2516
53.4842	46.3615	37.8799	32.3792	21.8834	7.8363	12.8452	12.9576	15.2351	24.0682	24.4525	23.2871	19.889	14.8599	9.52606	6.30838	0.859617	11.5423	16.2516
53.4842	46.3615	37.8799	32.3792	21.8834	7.8363	12.8452	12.9576	15.9498	24.0682	24.4525	23.2871	19.889	14.8599	9.52606	6.30838	1.7341	11.5423	16.2516
53.4842	46.3615	37.8799	32.3792	21.8834	7.8363	12.8452	12.9576	15.9498	24.0682	24.4525	23.2871	19.889	14.8599	9.52606	6.30838	1.7341	11.5423	16.2516
53.4842	46.3615	37.8799	32.3792	21.8834	7.8363	12.8452	13.1025	15.9498	24.0682	24.4525	23.2871	19.889	14.8599	9.52606	6.30838	1.7341	11.5423	16.2516
53.4842	46.3615	37.8799	32.3792	21.8834	7.8363	12.8452	13.1025	15.9498	24.0682	24.4525	23.2871	19.889	14.8599	9.52606	6.30838	1.7341	11.5423	16.2516
53.4842	46.3615	37.8799	32.3792	21.8834	7.8363	12.8452	13.1025	15.9498	24.0682	24.4525	23.2871	19.889	14.8599	9.52606	6.30838	1.7341	11.5423	16.2516
53.4842	46.3615	37.8799	32.3792	21.8834	7.8363	12.8452	13.1025	15.9498	24.0682	24.4525	23.2871	19.8969	14.8599	9.52606	6.30838	1.7341	11.5423	16.2516
53.4842	46.3615	37.8799	32.3792	21.8834	7.8363	12.8452	13.1025	15.9498	24.0682	24.4525	23.2871	19.8969	14.8599	9.52606	6.30838	1.7341	11.5423	16.2516
53.4842	46.3615	37.8799	32.3792	21.8834	7.8363	12.8452	13.1025	15.9498	24.0682	24.4525	23.2871	19.8969	14.8599	9.52606	6.30838	1.7341	11.5423	16.2516
53.4842	46.3615	37.8799	32.3792	21.8834	7.8363	12.8452	13.1025	15.9498	24.0682	24.4525	23.2871	19.8969	14.8599	9.52606	6.30838	1.7341	11.5423	16.2516
	QQR	QR
0.05	20.5179	53.4842
0.1	20.6267	46.3615
0.15	20.6267	37.8799
0.2	20.6267	32.3792
0.25	20.6267	21.8834
0.3	20.6267	7.8363
0.35	20.6267	12.8452
0.4	20.6267	13.1025
0.45	20.6267	15.2351
0.5	20.6267	24.0682
0.55	20.7103	24.4525
0.6	20.7103	23.2871
0.65	20.718	19.889
0.7	20.718	14.8599
0.75	20.718	9.52606
0.8	20.7184	6.30838
0.85	20.7184	0.859617
0.9	20.7184	11.5423
0.95	20.7184	16.2516

## Sheet: OGAP
-125.643	-93.1402	-65.2197	-12.8674	22.6643	18.8899	17.1043	22.4993	29.609	20.7738	23.608	22.3421	30.9306	25.6998	29.7721	37.4561	42.9218	94.2889	147.895
-125.643	-93.1402	-65.2197	-12.8674	22.6643	18.8899	17.1043	22.4993	29.609	20.7738	23.608	22.3421	30.9306	25.6998	29.7721	37.4561	42.9218	94.2889	147.895
-125.643	-93.1402	-65.2197	-12.8674	22.6643	18.8899	17.1043	22.4993	32.8696	20.7738	23.608	22.3421	30.9306	25.6998	29.7721	37.4561	42.9218	94.2889	147.895
-125.643	-93.1402	-65.2197	-12.8674	22.6643	18.8899	17.1043	22.4993	32.8696	20.7738	23.608	22.3421	30.9306	25.6998	29.7721	37.4561	42.9218	94.2889	147.895
-125.643	-93.1402	-65.2197	-12.8674	22.6643	18.8899	17.1043	22.4993	32.8696	20.7738	23.608	22.3421	30.9306	25.6998	29.7721	37.4561	42.9218	94.2889	147.895
-125.643	-93.1402	-65.2197	-12.8674	22.6643	18.8899	17.1043	22.4993	32.8696	20.7738	23.608	22.3421	30.9306	25.6998	29.7721	37.4561	42.9218	94.2889	147.895
-125.643	-93.1402	-65.2197	-12.8674	22.6643	18.8899	17.1043	22.4993	32.8696	21.1163	23.608	22.3421	30.9306	25.6998	29.7721	37.4561	42.9218	94.2889	147.895
-125.643	-93.1402	-65.2197	-12.8674	22.6643	18.8899	17.1043	22.4993	32.8696	21.1163	23.608	22.3421	30.9306	25.6998	29.7721	37.4561	42.9218	94.2889	147.895
-125.643	-93.1402	-65.2197	-12.8674	22.6643	18.8899	17.1043	22.4993	32.8696	21.6234	23.608	22.3421	30.9306	25.6998	29.7721	37.4561	42.9218	94.2889	147.895
-125.643	-93.1402	-65.2197	-12.8674	22.6643	18.8899	17.1043	22.4993	32.8696	21.6234	23.608	22.3421	30.9306	25.6998	29.7721	37.4561	42.9218	94.2889	147.895
-125.643	-93.1402	-65.2197	-12.8674	22.6643	18.8899	17.1043	22.4993	32.8696	24.9463	23.608	22.3421	30.9306	25.6998	29.7721	37.4561	42.9218	94.2889	147.895
-125.643	-93.1402	-65.2197	-12.8674	22.6643	18.8899	17.1043	22.4993	32.8696	24.9463	23.608	22.3421	30.9306	25.6998	29.7721	37.4561	42.9218	94.2889	147.895
-125.643	-93.1402	-65.2197	-12.8674	22.6643	18.8899	17.1043	22.4993	32.8696	24.9463	23.608	22.3421	30.9306	25.6998	29.7721	37.4561	42.9218	94.2889	147.895
-125.643	-93.1402	-65.2197	-12.8674	22.6643	18.8899	17.1043	22.4993	32.8696	24.9463	23.608	22.3421	30.9306	25.6998	29.7721	37.4561	42.9218	94.2889	147.895
-125.643	-93.1402	-65.2197	-12.8674	22.6643	18.8899	17.1043	22.4993	32.8696	24.9463	23.608	22.3421	30.9306	25.6998	29.7721	37.4561	42.9218	94.2889	147.895
-125.643	-93.1402	-65.2197	-12.8674	22.6643	18.8899	17.1043	22.4993	33.147	24.9463	23.608	22.3421	30.9306	25.6998	29.7721	37.4561	42.9218	94.2889	147.895
-125.643	-93.1402	-65.2197	-12.8674	22.6643	18.8899	17.1043	22.4993	33.147	24.9463	23.608	22.3421	30.9306	25.6998	29.7721	37.4561	42.9218	94.2889	147.895
-125.643	-93.1402	-65.2197	-12.8674	22.6643	18.8899	17.1043	22.4993	33.147	24.9463	23.608	22.3421	30.9306	25.6998	29.7721	37.4561	42.9218	94.2889	147.895
-125.643	-93.1402	-65.2197	-12.8674	22.6643	18.8899	17.1043	22.4993	33.147	24.9463	25.6349	22.3421	30.9306	25.6998	29.7721	37.4561	42.9218	94.2889	147.895
	QQR	QR
0.05	15.2413	-125.643
0.1	15.2413	-93.1402
0.15	15.4129	-65.2197
0.2	15.4129	-12.8674
0.25	15.4129	22.6643
0.3	15.4129	18.8899
0.35	15.431	17.1043
0.4	15.431	22.4993
0.45	15.4576	32.8696
0.5	15.4576	20.7738
0.55	15.6325	23.608
0.6	15.6325	22.3421
0.65	15.6325	30.9306
0.7	15.6325	25.6998
0.75	15.6325	29.7721
0.8	15.6471	37.4561
0.85	15.6471	42.9218
0.9	15.6471	94.2889
0.95	15.7538	147.895
