# Supplementary material for: Macroeconomic Imbalances and Financial Stress Among BRICS: Analysis of Frequency-Dependent and Asymmetric Causal Nexuses
Source: publisher site journal article supplement (doi:10.1515/snde-2024-0045), 2025-04-16
Supplement: Supplementary file 48 [file IMF4-Brazil.xlsx]

## Sheet: CA
-0.741188	-0.741188	-0.741188	-0.741188	-0.741188	-0.741188	-0.741188	-0.741188	-1.42928	-1.42928	1.01496	1.01496	1.58608	1.58608	1.58608	1.58608	1.58608	1.58608	1.58608
-0.0828614	-0.0828614	-0.0828614	-0.164561	-7.31727	-7.31727	-7.31727	-7.31727	-7.31727	-7.31727	-7.31727	-7.31727	-7.31727	-7.31727	-7.31727	-7.31727	0.376077	0.376077	0.376077
0.110921	0.110921	0.110921	0.110921	0.110921	0.110921	0.110921	0.110921	2.43917	2.43917	2.43917	2.43917	2.43917	2.43917	2.43917	0.285903	0.285903	0.285903	0.285903
34.7908	34.7908	34.7908	34.7908	34.7908	34.7908	34.7908	34.7908	34.7908	34.7908	34.7908	34.7908	34.7908	34.7908	34.7908	34.7908	34.7908	34.7908	34.7908
-3.53281	-3.53281	-3.53281	-3.22028	-3.22028	-3.06615	-3.06615	-3.06615	-2.61023	-2.61023	-1.88936	-1.88936	-1.88936	-0.6833	-0.6833	-0.6833	0.120491	0.120491	0.505564
-0.294209	-0.294209	-0.294209	-0.294209	-0.294209	-0.339156	-0.339156	-0.339156	1.96962	1.34023	-0.249334	0.363251	0.367755	0.367755	0.367755	0.367755	0.367755	0.367755	0.367755
-0.178185	-0.178185	-0.178185	-0.178185	-0.178185	-0.178185	-0.178185	-3.2955	-14.5022	-14.5022	-14.5022	-14.5022	-3.2289	-0.806748	-0.806748	0.0953447	0.0953447	0.0953447	0.0953447
-0.121447	-0.121447	-0.121447	-0.121447	-2.71817	-2.71817	-3.14858	-19.6871	-19.6871	-19.6871	-19.6871	-19.6871	-19.6871	-19.6871	-19.6871	-19.6871	-19.6871	-19.6871	-19.6871
-1.94752	-1.94752	-1.94752	-1.94752	-1.82198	-1.82198	-1.82198	-4.80245	-4.51571	-4.51571	-5.08357	-2.88235	-2.88235	-2.79584	-2.79584	1.0038	-0.0601126	-0.0601126	-0.0601126
0.169557	0.169557	0.169557	0.169557	0.169557	0.194138	2.21037	2.21037	2.21037	2.21037	1.51831	3.66148	-2.28416	-2.28416	-2.28416	-2.28416	-2.28416	-2.28416	-2.28416
0.295072	0.295072	0.295072	0.295072	0.295072	0.295072	0.295072	0.295072	2.51128	2.51128	2.51128	2.51128	2.51128	2.51128	2.51128	3.22659	-0.192342	-0.192342	-0.192342
0.458114	0.458114	0.458114	0.458114	0.458114	0.458114	-0.290588	-0.290588	-0.290588	-0.290588	-0.290588	-0.290588	-0.290588	-0.320945	-0.320945	-0.320945	-0.320945	-0.320945	-0.320945
1.33698	1.33698	1.20586	1.20586	1.20586	1.00065	1.00065	1.00065	1.2257	-1.44219	-1.04772	-0.803657	-0.803657	-1.06863	-1.06863	-1.25326	-1.17468	-1.17468	-1.17468
-0.034139	3.56931	3.56931	3.56931	3.56931	3.56931	3.56931	3.56931	3.56931	3.56931	3.56931	3.56931	3.56931	3.56931	3.56931	3.56931	3.56931	1.08293	0.814643
-0.020665	-0.020665	-0.020665	-0.020665	-0.020665	-28.147	-28.147	-28.147	-28.147	-28.147	-28.147	-28.147	-28.147	-28.147	-28.147	-28.147	-28.147	-28.147	-28.147
8.30659	8.30659	8.30659	8.30659	8.30659	8.30659	8.30659	8.30659	8.30659	8.30659	8.30659	8.30659	8.30659	8.30659	8.30659	8.30659	8.30659	8.30659	8.30659
0.0476614	3.90324	3.90324	3.90324	3.90324	3.90324	3.90324	3.90324	3.90324	3.90324	3.90324	3.90324	3.90324	3.90324	3.90324	3.90324	3.90324	3.90324	3.90324
0.0915685	0.0915685	-5.37375	-5.37375	-5.37375	-5.37375	-5.37375	-5.37375	-5.37375	-5.37375	-5.37375	-5.37375	-5.37375	-5.37375	-5.37375	-5.37375	-0.360059	-0.360059	-0.360059
0.783175	0.783175	0.783175	0.783175	0.783175	0.783175	0.783175	0.783175	0.470206	0.470206	-0.933106	-0.933106	-0.933106	-0.933106	-0.933106	-0.933106	-0.933106	-0.933106	-0.933106
	QQR	QR
0.05	0.228654	-0.0268231
0.1	-4.5838	-0.0279748
0.15	1.00553	-0.00105797
0.2	34.7908	-0.00447138
0.25	-2.0226	-0.0121078
0.3	0.184712	-0.0192617
0.35	-3.52699	-0.0313137
0.4	-12.9113	-0.0355582
0.45	-2.2477	-0.0273117
0.5	-0.0487316	-0.040061
0.55	1.1889	-0.0314006
0.6	-0.0637421	-0.0356577
0.65	-0.0259245	-0.042372
0.7	3.10381	-0.0399893
0.75	-20.7453	-0.0515246
0.8	8.30659	-0.0504502
0.85	3.70032	-0.0708972
0.9	-4.00682	-0.10437
0.95	-0.0627444	-0.103117

## Sheet: CGD
-10.5366	-10.1183	-8.29971	-4.99593	-1.39812	3.4766	6.61916	6.44304	6.67288	-0.87205	-13.0739	-17.3299	-17.0537	-16.805	-13.1846	-12.6848	-10.9789	-9.89321	-9.32636
-10.5366	-10.1183	-8.29971	-4.99593	-1.39812	3.4766	6.61916	6.44304	6.67288	-0.87205	-13.0739	-17.3299	-17.0537	-16.805	-13.1846	-12.6848	-10.9789	-9.89321	-9.32636
-10.5366	-10.1183	-8.29971	-4.99593	-1.39812	3.4766	6.61916	6.44304	6.67288	-1.59173	-13.0739	-17.3299	-17.0537	-16.805	-13.1846	-12.6848	-10.9789	-9.89321	-9.32636
-10.5366	-10.1183	-8.29971	-4.99593	-1.39812	3.4766	6.61916	6.44304	6.67288	-1.59173	-13.0739	-17.3299	-17.0537	-16.805	-13.1846	-12.6848	-10.9789	-9.89321	-9.32636
-10.5366	-10.1183	-8.29971	-4.99593	-1.39812	3.4766	6.61916	6.44304	6.67288	-1.59173	-13.0739	-17.3299	-17.0537	-16.805	-13.1846	-12.6848	-10.9789	-9.89321	-9.32636
-10.5366	-10.1183	-8.29971	-4.99593	-1.39812	3.4766	6.61916	6.44304	6.67288	-1.59173	-13.0739	-17.3299	-17.0537	-16.805	-13.1846	-12.6848	-10.9789	-9.89321	-9.32636
-10.5366	-10.1183	-8.29971	-4.99593	-1.39812	3.4766	6.61916	6.44304	6.67288	-1.59173	-13.0739	-17.3299	-17.0537	-16.805	-13.1846	-12.6848	-10.9789	-9.89321	-9.32636
-10.5366	-10.1183	-8.29971	-4.99593	-1.39812	3.4766	6.61916	6.44304	6.67288	-1.59173	-13.0739	-17.3299	-17.0537	-16.805	-13.1846	-12.6848	-10.9789	-9.89321	-9.32636
-10.5366	-10.1183	-8.29971	-4.99593	-1.39812	3.4766	6.61916	6.44304	6.67288	-1.59173	-13.0739	-17.3299	-17.0537	-16.805	-13.1846	-12.6848	-10.9789	-9.89321	-9.32636
-10.5366	-10.1183	-8.29971	-5.65482	-1.39812	3.4766	6.61916	6.44304	6.67288	-1.59173	-13.0739	-17.3299	-17.0537	-16.805	-13.1846	-12.6848	-10.9789	-9.89321	-9.32636
-10.5366	-10.1183	-8.29971	-5.65482	-1.39812	3.4766	6.61916	6.44304	6.67288	-1.59173	-13.0739	-17.3299	-17.0537	-16.805	-13.1846	-12.6848	-10.9789	-9.89321	-9.32636
-10.5366	-10.1183	-8.29971	-5.65482	-1.39812	3.4766	6.61916	6.44304	6.67288	-1.59173	-13.0739	-17.3299	-17.0537	-16.805	-13.1846	-12.6848	-10.9789	-9.89321	-9.32636
-10.5366	-10.1183	-8.29971	-5.65482	-1.39812	3.4766	6.61916	6.44304	6.67288	-1.59173	-13.0739	-17.3299	-17.0537	-16.805	-13.1846	-12.6848	-10.9789	-9.89321	-9.32636
-10.5366	-10.1183	-8.29971	-5.65482	-1.39812	3.4766	6.61916	6.44304	6.67288	-1.59173	-13.0739	-17.3299	-17.0537	-16.805	-13.1846	-12.6848	-10.9789	-9.89321	-9.32636
-10.5366	-10.1183	-8.29971	-5.65482	-1.39812	3.4766	6.61916	6.44304	6.67288	-1.59173	-13.0739	-17.3299	-17.0537	-16.805	-13.1846	-12.6848	-10.9789	-9.89321	-9.32636
-10.5366	-10.1183	-8.29971	-5.65482	-1.39812	3.4766	6.61916	6.44304	4.11924	-1.59173	-13.0739	-17.3299	-17.0537	-16.805	-13.1846	-12.6848	-10.9789	-9.89321	-9.32636
-10.5366	-10.1183	-9.53177	-5.65482	-1.39812	3.4766	6.61916	6.44304	4.11924	-1.59173	-13.0739	-17.3299	-17.0537	-16.805	-13.1846	-12.6848	-10.9789	-9.89321	-9.32636
-10.5366	-10.1183	-9.53177	-5.65482	-1.39812	3.4766	6.61916	6.44304	4.11924	-1.59173	-13.0739	-17.3299	-17.0537	-16.805	-13.1846	-12.6848	-10.9789	-9.89321	-9.32636
-10.5366	-10.391	-9.53177	-5.65482	-1.39812	3.4766	6.61916	6.44304	4.11924	-1.59173	-13.0739	-17.3299	-17.0537	-16.805	-13.1846	-12.6848	-10.9789	-9.89321	-9.32636
	QQR	QR
0.05	-7.01786	-10.5366
0.1	-7.01786	-10.1183
0.15	-7.05574	-8.29971
0.2	-7.05574	-4.99593
0.25	-7.05574	-1.39812
0.3	-7.05574	3.4766
0.35	-7.05574	6.61916
0.4	-7.05574	6.44304
0.45	-7.05574	6.67288
0.5	-7.09042	-1.59173
0.55	-7.09042	-13.0739
0.6	-7.09042	-17.3299
0.65	-7.09042	-17.0537
0.7	-7.09042	-16.805
0.75	-7.09042	-13.1846
0.8	-7.22482	-12.6848
0.85	-7.28967	-10.9789
0.9	-7.28967	-9.89321
0.95	-7.30402	-9.32636

## Sheet: OGAP
71.8808	67.2453	58.4636	46.634	41.5549	41.0249	40.467	37.922	37.5823	38.5741	34.6926	33.1593	34.9604	31.4113	33.6437	30.5496	29.1269	31.8122	30.9052
71.8808	67.2453	58.4636	46.634	41.5549	41.0249	40.467	39.6951	37.5823	38.5741	34.6926	33.1593	34.9604	31.4113	33.6437	30.5496	29.1269	31.8122	30.9052
71.8808	67.2453	58.4636	46.634	41.5549	41.0249	40.467	39.6951	37.5823	38.5741	34.6926	33.1593	34.9604	31.4113	33.6437	30.5496	29.1269	31.8122	30.9052
71.8808	67.2453	58.4636	46.634	41.5549	41.0249	40.467	39.6951	37.5823	38.5741	34.6926	33.1593	34.9604	31.4113	33.6437	30.5496	29.1269	31.8122	30.9052
71.8808	67.2453	58.4636	46.634	41.5549	41.0249	40.467	39.6951	37.5823	38.5741	34.6926	33.1593	34.9604	31.4113	33.6437	30.5496	29.1269	31.8122	30.9052
71.8808	67.2453	58.4636	46.634	41.5549	41.0249	40.467	39.6951	37.5823	38.5741	34.6926	33.1593	34.9604	31.4113	33.6437	30.5496	29.1269	31.8122	30.9052
71.8808	67.2453	58.4636	46.634	41.5549	41.0249	40.467	39.6951	37.5823	38.5741	34.6926	33.1593	34.9604	31.4113	33.6437	30.5496	29.1269	31.8122	30.9052
71.8808	67.2453	58.4636	46.634	41.5549	41.0249	40.467	39.6951	37.5823	38.5741	34.6926	33.1593	34.9604	31.4113	33.6437	30.5496	29.1269	31.8122	30.9052
71.8808	67.2453	58.4636	46.634	41.5549	41.0249	40.467	39.6951	37.5823	38.5741	34.6926	33.1593	34.9604	31.4113	33.6437	30.5496	29.1269	31.8122	30.9052
71.8808	67.2453	58.4636	46.634	41.5549	41.0249	40.467	39.6951	37.5823	38.5741	34.6926	33.1593	34.9604	31.4113	33.6437	30.5496	29.1269	31.8122	30.9052
71.8808	67.2453	58.4636	46.634	41.5549	41.0249	40.467	39.6951	37.5823	38.5741	34.6926	33.1593	34.9604	31.4113	33.6437	30.5496	29.1269	31.8122	30.9052
71.8808	67.2453	58.4636	46.634	41.5549	41.0249	40.467	39.6951	37.5823	38.5741	34.6926	33.1593	34.9604	31.4113	33.6437	30.5496	29.1269	31.8122	30.9052
71.8808	67.2453	58.4636	46.634	41.5549	41.0249	40.467	39.6951	37.5823	38.5741	34.6926	33.1593	34.9604	31.4113	33.6437	30.5496	29.1269	31.8122	30.9052
71.8808	67.2453	58.4636	46.634	41.5549	41.0249	40.467	39.6951	37.5823	38.5741	34.6926	33.1593	34.9604	31.4113	33.6437	30.5496	29.1269	31.8122	30.9052
71.8808	67.2453	58.4636	46.634	41.5549	41.0249	40.467	39.6951	37.5823	38.5741	34.6926	33.1593	34.9604	31.4113	33.6437	30.5496	29.1269	31.8122	30.9052
71.8808	67.2453	58.4636	46.634	41.5549	41.0249	40.467	39.6951	37.5823	38.5741	34.6926	33.1593	34.9604	31.4113	33.6437	30.5496	29.1269	31.8122	30.9052
71.8808	67.2453	58.4636	46.634	41.5549	41.0249	40.467	39.6951	37.5823	38.5741	34.6926	33.1593	34.9604	31.4113	33.6437	30.5496	29.1269	31.8122	30.9052
71.8808	67.2453	58.4636	46.634	41.5549	41.0249	40.467	39.6951	37.5823	38.5741	34.6926	33.1593	34.9604	31.4113	33.6437	30.5496	29.1269	31.8122	30.9052
71.8808	67.2453	58.4636	46.634	41.5549	41.0249	40.467	39.6951	37.5823	38.5741	34.6926	33.1593	34.9604	31.4113	33.6437	30.5496	29.1269	31.8122	30.9052
	QQR	QR
0.05	40.611	71.8808
0.1	40.7044	67.2453
0.15	40.7044	58.4636
0.2	40.7044	46.634
0.25	40.7044	41.5549
0.3	40.7044	41.0249
0.35	40.7044	40.467
0.4	40.7044	39.6951
0.45	40.7044	37.5823
0.5	40.7044	38.5741
0.55	40.7044	34.6926
0.6	40.7044	33.1593
0.65	40.7044	34.9604
0.7	40.7044	31.4113
0.75	40.7044	33.6437
0.8	40.7044	30.5496
0.85	40.7044	29.1269
0.9	40.7044	31.8122
0.95	40.7044	30.9052
