# Supplementary material for: Macroeconomic Imbalances and Financial Stress Among BRICS: Analysis of Frequency-Dependent and Asymmetric Causal Nexuses
Source: publisher site journal article supplement (doi:10.1515/snde-2024-0045), 2025-04-16
Supplement: Supplementary file 49 [file Residual-Brazil.xlsx]

## Sheet: CA
1.59315	1.59315	1.59315	1.59315	1.59315	1.51191	1.51191	1.59271	1.59271	1.59271	1.59271	1.59271	1.67019	1.59194	1.59194	1.66787	1.66787	1.73995	1.80805
1.89263	1.89263	1.89263	1.82148	1.82148	1.82148	1.89029	1.89029	1.89029	1.8184	1.8184	1.88579	1.88579	1.88579	1.87958	1.87958	1.87958	1.87214	1.93221
2.24902	2.24902	2.24902	2.24902	2.19623	2.24617	2.24617	2.24617	2.24617	2.19203	2.24052	2.24052	2.24052	2.1851	2.23205	2.23205	2.17545	2.16316	2.20671
2.49912	2.49912	2.49912	2.52954	2.52954	2.52954	2.49581	2.49581	2.49581	2.52459	2.52459	2.48937	2.48937	2.51648	2.47984	2.47984	2.50527	2.46722	2.45157
2.64739	2.64739	2.64739	2.6615	2.6615	2.6615	2.6615	2.6615	2.65668	2.65668	2.65668	2.65668	2.63765	2.64863	2.64863	2.62794	2.63733	2.61498	2.62277
2.65883	2.67182	2.67548	2.68179	2.68179	2.6846	2.6846	2.68872	2.68872	2.687	2.687	2.687	2.68295	2.68412	2.68412	2.68412	2.67453	2.67453	2.6617
2.61892	2.63272	2.62541	2.62299	2.6434	2.63205	2.63205	2.65098	2.65098	2.65098	2.63802	2.63802	2.65549	2.65549	2.65549	2.64098	2.64098	2.64098	2.64098
2.49376	2.47219	2.48378	2.48378	2.51727	2.49265	2.49265	2.49265	2.52472	2.49862	2.49862	2.49862	2.49862	2.52922	2.52922	2.50162	2.50162	2.50162	2.50162
2.29752	2.26351	2.27075	2.27075	2.31409	2.27649	2.27649	2.27649	2.31988	2.28059	2.28059	2.28059	2.28059	2.32371	2.32371	2.28289	2.28289	2.28289	2.28289
2.00767	2.00874	2.00903	2.00903	2.05489	2.00882	2.00882	2.00882	2.00852	2.00852	2.00852	2.00852	2.00852	2.05524	2.00835	2.00835	2.00835	2.00835	2.00835
1.74032	1.73686	1.73383	1.73383	1.68704	1.73141	1.73141	1.73141	1.68488	1.72972	1.72972	1.72972	1.72972	1.68354	1.72884	1.72884	1.72884	1.72884	1.72884
1.4262	1.46843	1.42254	1.46499	1.41957	1.41957	1.46233	1.46233	1.41738	1.41738	1.46054	1.46054	1.41605	1.41605	1.41605	1.41605	1.45964	1.45964	1.45964
1.11749	1.1152	1.1587	1.11349	1.157	1.157	1.157	1.11229	1.1558	1.1558	1.1558	1.11155	1.15511	1.15511	1.15511	1.15511	1.11122	1.11122	1.11122
0.79475	0.793139	0.840141	0.791921	0.83914	0.791037	0.838485	0.838485	0.838485	0.790444	0.838106	0.838106	0.838106	0.838106	0.790106	0.837926	0.837926	0.837926	0.837926
0.383408	0.437617	0.382067	0.436522	0.435419	0.435419	0.435419	0.434444	0.434444	0.434444	0.48754	0.433733	0.433733	0.433733	0.486941	0.486941	0.433355	0.433355	0.433355
-7.74484	-7.68599	-6.28067	-0.653019	-0.441346	-0.268629	-0.26364	-0.26364	-0.18634	-0.259816	-0.183699	-0.183699	-0.111436	-0.181994	-0.181994	-0.110416	-0.110416	-0.181159	-0.181159
0.924592	-7.3746	-8.45965	-8.79853	-8.53995	-8.79839	-7.81453	-6.85045	-4.68853	-3.13932	-2.39015	-1.78381	-1.76562	-1.59178	-1.57807	-1.41908	-1.4111	-1.26667	-1.40699
6.53397	6.50227	6.00344	6.44931	6.81697	6.7139	6.59461	6.46227	-3.98519	-5.11742	-4.74131	-4.37543	-4.02158	-3.68108	-3.67389	-3.66664	-3.66025	-3.34047	-3.33632
10.9553	10.9255	10.2557	10.8758	10.806	10.716	10.6067	10.4791	9.5921	9.42147	-5.16448	-5.66735	-6.24709	-6.28114	-6.31179	-6.33828	-6.35982	-6.37545	-6.38368
	QQR	QR
0.05	1.61531	0.195186
0.1	1.87108	0.258779
0.15	2.22553	0.379675
0.2	2.50008	0.504238
0.25	2.64812	0.61101
0.3	2.68018	0.715421
0.35	2.64036	0.814797
0.4	2.50068	0.907436
0.45	2.28775	0.991906
0.5	2.01344	1.0147
0.55	1.72408	1.07974
0.6	1.43921	1.1318
0.65	1.13796	1.12818
0.7	0.823698	1.1629
0.75	0.437468	1.10121
0.8	-1.34073	1.13311
0.85	-4.1133	1.12398
0.9	0.446166	1.16095
0.95	2.60551	1.11229

## Sheet: CGD
3.28555	1.89916	-20.0496	-14.0897	-11.2067	-9.2135	-8.80403	-8.65348	-8.6089	-8.90973	-9.14191	-8.0064	-7.07784	-6.39298	-6.06772	-5.75577	-5.16588	-4.95049	-4.81863
2.63837	1.89916	-17.7343	-13.7134	-10.0355	-9.2135	-8.39934	-8.65348	-8.50461	-8.90973	-9.3441	-8.59993	-7.61018	-7.24551	-6.89082	-6.23027	-5.92905	-5.69014	-5.54616
2.04938	1.89916	-3.76192	-12.5022	-10.0355	-8.62963	-8.33708	-8.30375	-8.50461	-8.90973	-9.41828	-9.60943	-8.51335	-8.10871	-7.39775	-7.0422	-6.72281	-6.47639	-5.95669
0.950395	1.24835	-2.55816	-11.1741	-9.03872	-8.20357	-8.2918	-8.22744	-8.50461	-8.90973	-9.50983	-9.82757	-9.09156	-8.65099	-8.25042	-7.88176	-7.5617	-7.32286	-6.77447
0.541014	0.687173	-2.2088	-11.1305	-8.85169	-8.02864	-8.05601	-8.17891	-8.50461	-8.90973	-9.52508	-10.018	-10.0708	-9.56458	-9.13336	-8.76114	-8.45766	-8.23913	-8.11683
-0.139674	0.199793	-2.2088	-7.49028	-8.34481	-7.96979	-7.99552	-8.14599	-8.48956	-8.90973	-9.52508	-10.0361	-10.5088	-10.5305	-10.0631	-9.69507	-9.42004	-9.23146	-9.12722
-0.42178	-0.985097	-2.55816	-6.26921	-8.1309	-7.95255	-7.99552	-8.14599	-8.48956	-8.90973	-9.52508	-10.0422	-10.5264	-10.9556	-11.3184	-11.1665	-10.9646	-10.897	-10.8103
-0.889693	-1.31189	-2.86324	-6.11248	-8.06695	-7.96979	-7.99552	-8.14599	-8.48956	-8.88127	-9.52508	-10.0783	-10.6283	-11.0159	-11.3928	-11.6653	-12.0408	-12.1832	-12.3634
-1.29538	-1.85196	-3.76439	-6.11248	-8.06695	-7.96979	-7.99552	-8.17891	-8.48956	-8.88127	-9.49472	-10.1269	-10.655	-11.0285	-11.4101	-11.8291	-12.0503	-12.2612	-12.3634
-1.29538	-2.5163	-3.98925	-6.11248	-8.06695	-7.97929	-8.14969	-8.29519	-8.55781	-8.90973	-9.49472	-10.1269	-10.655	-11.0642	-11.4204	-11.8291	-12.0671	-12.2612	-12.3634
-1.46461	-2.71031	-4.18917	-6.26921	-8.06695	-8.05341	-8.14969	-8.29519	-8.65799	-9.04428	-9.49472	-10.0783	-10.655	-11.0642	-11.4204	-11.8291	-12.0671	-12.2786	-12.3649
-1.88287	-3.20814	-4.84969	-6.99615	-8.08831	-8.16291	-8.2276	-8.50822	-8.72938	-9.04428	-9.49472	-10.065	-10.6283	-11.0285	-11.4101	-11.8291	-12.0671	-12.2786	-12.3649
-1.88287	-3.37695	-5.01915	-6.99615	-8.1558	-8.19317	-8.3377	-8.5903	-8.7795	-9.13038	-9.49472	-10.065	-10.5539	-11.0285	-11.367	-11.8291	-12.0503	-12.2612	-12.3634
-2.20958	-3.92729	-5.70589	-7.12626	-8.20263	-8.2918	-8.50521	-8.72615	-8.8635	-9.13038	-9.49472	-9.94582	-10.3798	-10.9795	-11.367	-11.6835	-12.0503	-12.2612	-12.3634
-2.20958	-4.07506	-5.8513	-7.82308	-8.26936	-8.37967	-8.69579	-8.87265	-9.08468	-9.34648	-9.49472	-9.94582	-10.3693	-10.8377	-11.367	-11.6366	-12.0503	-12.1856	-12.3634
-2.724	-4.67297	-6.54967	-7.82308	-8.43002	-8.57252	-8.75327	-9.01711	-9.08468	-9.34648	-9.49472	-9.94582	-10.0841	-10.5859	-11.2013	-11.6366	-11.9426	-12.1856	-12.3634
-3.16418	-5.31345	-6.54967	-8.2797	-8.48776	-8.70057	-8.97947	-9.03363	-9.30939	-9.52035	-9.59091	-9.94582	-10.0841	-10.5859	-10.9897	-11.4987	-11.855	-12.1856	-12.3634
-3.65953	-5.31345	-7.2507	-8.41712	-8.65366	-8.92486	-9.12354	-9.17322	-9.44135	-9.56948	-9.69505	-9.94582	-10.0841	-10.5331	-10.9572	-11.3326	-11.855	-12.169	-12.3337
-3.65953	-5.9864	-8.04789	-8.58802	-8.78478	-9.10758	-9.26659	-9.40678	-9.44135	-9.56948	-9.81986	-9.94582	-10.0841	-10.3556	-10.7179	-11.3326	-11.6724	-12.0605	-12.3337
	QQR	QR
0.05	-7.45939	-1.39361
0.1	-7.56382	-2.59241
0.15	-7.06745	-5.17287
0.2	-7.24108	-8.32635
0.25	-7.6067	-8.22408
0.3	-7.77009	-8.27488
0.35	-8.21393	-8.37967
0.4	-8.50628	-8.53927
0.45	-8.62239	-8.81024
0.5	-8.69232	-9.15411
0.55	-8.7449	-9.49472
0.6	-8.88757	-9.86221
0.65	-8.91974	-10.2023
0.7	-9.01126	-10.6679
0.75	-9.0978	-10.9838
0.8	-9.17968	-11.3777
0.85	-9.28618	-11.8069
0.9	-9.39118	-12.1666
0.95	-9.4832	-12.3337

## Sheet: OGAP
33.5379	49.3313	62.2445	81.7634	97.8659	113.579	134.151	148.426	161.343	172.537	181.594	182.035	187.639	191.941	183.028	186.856	190.919	189.808	188.924
33.5379	49.3313	62.2445	81.7634	97.8659	113.579	134.151	148.426	161.343	172.537	181.594	182.035	187.639	191.941	183.028	186.856	190.919	189.808	188.924
33.5379	49.3313	62.2445	81.7634	97.8659	113.579	134.151	148.426	161.343	172.537	181.594	182.035	187.639	191.941	183.028	186.856	190.919	189.808	188.924
33.5379	49.3313	62.2445	81.7634	97.8659	113.579	134.151	148.426	161.343	172.537	181.594	182.035	187.639	191.941	183.028	186.856	190.919	189.808	188.924
33.5379	49.3313	62.2445	81.7634	97.8659	113.579	134.151	148.426	161.343	172.537	181.594	182.035	187.639	191.941	183.028	186.856	190.919	189.808	188.924
33.5379	49.3313	62.2445	81.7634	97.8659	113.579	134.151	148.426	161.343	172.537	181.594	182.035	187.639	191.941	183.028	186.856	190.919	189.808	188.924
33.5379	49.3313	62.2445	81.7634	97.8659	113.579	134.151	148.426	161.343	172.537	181.594	182.035	187.639	191.941	183.028	186.856	190.919	189.808	188.924
33.5379	49.3313	62.2445	81.7634	97.8659	113.579	134.151	148.426	161.343	172.537	181.594	182.035	187.639	191.941	183.028	186.856	190.919	189.808	188.924
33.5379	49.3313	62.2445	81.7634	97.8659	113.579	134.151	148.426	161.343	172.537	181.594	182.035	187.639	191.941	183.028	186.856	190.919	189.808	188.924
33.5379	49.3313	62.2445	81.7634	97.8659	113.579	134.151	148.426	161.343	172.537	181.594	182.035	187.639	191.941	183.028	186.856	190.919	189.808	188.924
33.5379	49.3313	62.2445	81.7634	97.8659	113.579	134.151	148.426	161.343	172.537	181.594	182.035	187.639	191.941	183.028	186.856	190.919	189.808	188.924
33.5379	49.3313	62.2445	81.7634	97.8659	113.579	134.151	148.426	161.343	172.537	181.594	182.035	187.639	191.941	183.028	186.856	190.919	189.808	188.924
33.5379	49.3313	62.2445	81.7634	97.8659	113.579	134.151	148.426	161.343	172.537	181.594	182.035	187.639	191.941	183.028	186.856	190.919	189.808	188.924
33.5379	49.3313	62.2445	81.7634	97.8659	113.579	134.151	148.426	161.343	172.537	181.594	182.035	187.639	191.941	183.028	186.856	190.919	189.808	188.924
33.5379	49.3313	62.2445	81.7634	97.8659	113.579	134.151	148.426	161.343	172.537	181.594	182.035	187.639	191.941	183.028	186.856	190.919	189.808	188.924
33.5379	49.3313	62.2445	81.7634	97.8659	113.579	134.151	148.426	161.343	172.537	181.594	182.035	187.639	191.941	183.028	186.856	190.919	189.808	188.924
33.5379	49.3313	62.2445	81.7634	97.8659	113.579	134.151	148.426	161.343	172.537	181.594	182.035	187.639	191.941	183.028	186.856	190.919	189.808	183.44
33.5379	49.3313	62.2445	81.7634	97.8659	113.579	134.151	148.426	161.343	172.537	181.594	182.035	187.639	191.941	183.028	186.856	190.919	189.808	183.44
33.5379	49.3313	62.2445	81.7634	97.8659	113.579	134.151	148.426	161.343	172.537	181.594	182.035	187.639	191.941	183.028	186.856	190.919	189.808	183.44
	QQR	QR
0.05	144.08	33.5379
0.1	144.08	49.3313
0.15	144.08	62.2445
0.2	144.08	81.7634
0.25	144.08	97.8659
0.3	144.08	113.579
0.35	144.08	134.151
0.4	144.08	148.426
0.45	144.08	161.343
0.5	144.08	172.537
0.55	144.08	181.594
0.6	144.08	182.035
0.65	144.08	187.639
0.7	144.08	191.941
0.75	144.08	183.028
0.8	144.08	186.856
0.85	143.792	190.919
0.9	143.792	189.808
0.95	143.792	188.924
