# Supplementary material for: Macroeconomic Imbalances and Financial Stress Among BRICS: Analysis of Frequency-Dependent and Asymmetric Causal Nexuses
Source: publisher site journal article supplement (doi:10.1515/snde-2024-0045), 2025-04-16
Supplement: Supplementary file 50 [file Signal-Brazil.xlsx]

## Sheet: CA
0	0	0	0	0	0	0	0	0	0	0	0	0	0	0	0	0	0	0
-3.02461	-3.02461	-3.02461	-3.02461	-3.02461	-3.02461	-3.02461	-3.02461	-3.02461	-3.02461	-3.02461	-3.02461	-3.02461	-3.02461	-3.02461	-3.02461	-3.02461	-3.02461	-3.02461
67.1514	67.1514	67.1514	67.1514	67.1514	67.1514	67.1514	67.1514	67.1514	67.1514	67.1514	67.1514	67.1514	67.1514	67.1514	67.1514	67.1514	67.1514	67.1514
3.27479	3.27479	3.27479	3.27479	3.27479	3.27479	3.27479	3.27479	3.27479	3.27479	3.27479	3.27479	3.27479	3.27479	3.27479	3.27479	3.27479	3.27479	3.27479
1.52047	2.33587	2.33587	9.63932	9.63932	25.9776	25.9776	25.9776	25.9776	25.9776	25.9776	25.9776	25.9776	25.9776	25.9776	25.9776	25.9776	25.9776	25.9776
-2.85839	-2.85839	-2.85839	-2.85839	-2.85839	-2.85839	-2.85839	-2.85839	-2.85839	-8.19346	-44.4175	-44.4175	-44.4175	-44.4175	-44.4175	-44.4175	-44.4175	-44.4175	-44.4175
10.1273	10.1273	10.1273	10.1273	10.1273	10.1273	10.1273	10.1273	10.1273	10.1273	10.1273	10.1273	10.1273	10.1273	10.1273	10.1273	10.1273	10.1273	10.1273
0.878133	0.878133	0.878133	0.878133	0.878133	0.878133	0.878133	0.878133	0.878133	0.878133	0.878133	0.878133	0.878133	0.878133	0.878133	0.878133	-4.60682	-4.60682	-4.60682
-0.392327	-0.392327	-0.392327	-0.392327	-0.392327	-0.392327	-0.392327	-0.392327	-0.392327	-0.392327	-0.392327	-0.392327	-0.392327	-0.392327	-0.392327	-0.392327	-0.392327	-0.392327	-0.392327
7.5633	7.5633	7.5633	7.5633	7.5633	7.5633	7.5633	7.5633	7.5633	7.5633	7.5633	7.5633	7.5633	7.5633	7.5633	7.5633	7.5633	7.5633	0.0762341
0.251741	0.251741	0.251741	0.251741	0.251741	0.251741	0.251741	0.251741	0.251741	0.251741	0.251741	0.251741	0.251741	0.251741	0.251741	0.251741	0.251741	0.251741	0.251741
3.10877	3.10877	3.10877	3.10877	3.10877	3.10877	3.10877	3.10877	3.10877	3.10877	3.10877	3.10877	3.10877	3.10877	3.10877	3.10877	3.10877	3.10877	3.10877
0	0	0	0	0	0	0	0	0	0	0	0	0	0	0	0	0	0	0
-4.49446	-4.49446	-4.49446	1.61795	1.61795	1.61795	1.61795	1.61795	1.61795	1.61795	1.61795	1.61795	1.61795	1.61795	1.61795	1.61795	1.61795	6.28618	6.28618
-1.33462	-1.33462	-1.33462	-1.33462	-1.33462	-1.33462	-1.33462	-1.33462	-1.33462	-1.33462	-1.33462	-1.33462	-1.33462	-1.03295	-1.03295	-1.03295	-1.03295	-1.03295	-1.03295
1.04093	1.04093	1.04093	1.04093	1.04093	1.04093	1.04093	1.04093	1.04093	1.04093	1.04093	1.04093	1.04093	1.04093	1.04093	1.04093	1.04093	0.846553	0.846553
4.54009	4.54009	4.54009	4.54009	4.54009	4.54009	4.54009	4.54009	4.54009	2.34228	2.34228	2.34228	2.34228	2.34228	2.34228	2.34228	0.132197	0.132197	0.132197
-23.3064	-23.3064	-23.3064	-23.3064	-23.3064	-23.3064	-23.3064	-23.3064	-23.3064	-23.3064	-23.3064	-23.3064	-23.3064	-23.3064	-23.3064	-23.3064	-23.3064	-23.3064	-23.3064
0	0	0	0	0	0	0	0	0	0	0	0	0	0	0	0	0	0	0
	QQR	QR
0.05	0	0.064526
0.1	-3.02461	0.00779492
0.15	67.1514	0.00854052
0.2	3.27479	0.0144448
0.25	20.4819	0.0388089
0.3	-22.8251	-0.0202881
0.35	10.1273	-0.0343101
0.4	0.0120869	-0.0322815
0.45	-0.392327	-0.027088
0.5	7.16924	-0.0285127
0.55	0.251741	-0.0252337
0.6	3.10877	0.00353477
0.65	0	-0.0397164
0.7	1.14423	-0.0447613
0.75	-1.23935	-0.0339543
0.8	1.02047	-0.0354407
0.85	3.03439	-0.00690728
0.9	-23.3064	-0.00279631
0.95	0	-0.0219957

## Sheet: CGD
-13.9221	-10.3093	2.10766	2.42704	0.598949	0.90827	-2.40169	-0.601962	-2.80237	-4.34123	-4.6708	-2.75298	-3.38815	-3.10635	-3.81325	-3.47728	-2.93826	-10.395	-9.57081
-13.9221	-10.3093	2.10766	1.34984	0.354072	-0.3754	-2.40169	-1.01474	-3.56371	-4.86387	-4.55881	-3.29036	-3.5045	-3.12193	-3.81325	-3.92295	-2.93826	-10.395	-15.2306
-13.1315	-10.3093	1.43588	1.2862	0.354072	-0.913941	-3.78242	-2.10194	-3.96293	-4.86387	-4.55881	-3.64974	-4.34044	-3.12193	-4.21008	-3.92295	-2.93826	-10.395	-15.2306
-12.8012	-10.1148	-0.439071	1.24784	0.0513071	-0.924163	-3.78242	-2.68155	-3.96293	-4.86387	-4.55881	-3.64974	-4.81156	-5.71301	-4.21008	-3.92295	-2.93826	-10.395	-15.2306
-12.1147	-8.35556	-2.41941	-0.0530772	0.0513071	-0.924163	-3.99978	-6.30938	-6.18475	-4.86387	-4.55881	-3.65384	-4.91136	-6.12925	-6.47079	-4.11427	-3.72871	-10.395	-15.2306
-8.53353	-8.35556	-2.41941	-0.98742	-1.18336	-0.924163	-4.10093	-6.36396	-6.18475	-4.94647	-4.6708	-3.99721	-5.02339	-6.24438	-6.47079	-6.16893	-3.72871	-10.395	-10.4321
-11.9376	-8.35556	-6.20465	-1.06103	-1.62241	-2.24729	-4.94983	-7.20713	-7.07948	-4.94647	-4.6708	-5.53118	-5.19289	-6.24438	-6.80768	-7.44111	-3.72871	-10.395	-9.57081
-12.8012	-8.35556	-9.43794	-5.83168	-2.29531	-3.81684	-5.28609	-7.29723	-7.13281	-5.26623	-5.15815	-6.23352	-7.16864	-7.08123	-6.80768	-7.67536	-5.27371	-8.42851	-9.57081
-13.1584	-11.8167	-12.4793	-8.27613	-7.93291	-7.75939	-7.85249	-7.91818	-7.23716	-7.31182	-6.08405	-7.13091	-7.91631	-7.10266	-7.90088	-7.70394	-5.74922	-6.35693	-4.9735
-13.6469	-12.8735	-14.0066	-12.3263	-9.6167	-11.493	-11.502	-8.89488	-8.01871	-7.35673	-7.34101	-8.50438	-8.76251	-8.07279	-7.90088	-7.70394	-5.74922	-6.35693	-4.86703
-13.6469	-15.7351	-14.762	-16.0141	-14.5962	-12.8386	-12.3653	-11.8452	-9.33602	-7.76297	-10.2454	-9.48763	-9.47938	-8.87835	-7.90088	-7.67536	-5.74922	-4.44303	-4.86703
-13.8577	-19.3021	-17.3005	-18.0042	-15.9453	-13.1949	-13.6833	-14.3407	-13.5734	-11.508	-11.0287	-10.9998	-9.6039	-8.87835	-6.53673	-6.51753	-4.8969	-3.26523	-4.86703
-13.8577	-21.1922	-20.4048	-19.0959	-19.2024	-17.6351	-15.3852	-14.4989	-15.9211	-15.9731	-11.5951	-11.6004	-9.47938	-7.76644	-5.71301	-4.35487	-4.8969	-3.26523	-4.86703
-13.8577	-21.1922	-20.487	-20.0765	-23.0643	-18.7373	-17.3829	-15.0147	-15.9413	-16.3126	-11.5951	-10.9998	-8.09689	-5.342	-5.20043	-3.99364	-4.63541	-1.97847	-3.39209
-13.8577	-23.3354	-21.5396	-20.4205	-23.1048	-23.608	-20.1246	-15.0147	-15.9413	-15.9731	-10.2454	-4.98017	-3.82582	-2.30742	-2.37986	-3.06089	-1.17304	-1.97847	-3.39209
-13.8577	-23.3354	-21.8601	-20.4787	-23.1048	-23.608	-15.7975	-14.3407	-15.6859	-7.5077	-4.81643	-2.43203	-1.069	-1.77963	-1.72449	0.530957	-0.495921	-1.51556	-3.39209
-13.8577	-21.1922	-20.4048	-19.9101	-20.586	-17.5376	-13.2738	-13.6833	-11.251	0.698535	0.217268	1.55814	0.881547	-0.813377	-0.194184	1.77526	1.79174	-0.990178	-3.39209
-12.1236	-13.1584	-6.71591	-11.8167	-4.49714	-1.90843	-2.07266	6.87872	7.88847	6.52359	4.97743	2.60899	2.37524	3.01047	3.25449	2.34986	2.14784	1.52889	-2.55425
69.5744	50.6266	63.6376	58.1295	44.8293	43.0805	42.1422	30.1572	21.5191	16.9428	9.01645	6.8733	9.57767	6.34262	5.35276	4.16416	3.14072	2.85575	-1.44517
	QQR	QR
0.05	-3.81313	-13.1315
0.1	-4.39025	-10.3093
0.15	-4.65039	-13.7015
0.2	-4.93162	-13.1027
0.25	-5.49295	-9.80922
0.3	-5.32267	-9.50921
0.35	-6.06284	-10.2606
0.4	-6.89045	-7.85249
0.45	-8.03478	-7.17585
0.5	-9.21021	-5.84697
0.55	-10.4015	-4.55881
0.6	-11.4371	-3.73032
0.65	-12.4581	-4.4205
0.7	-12.4895	-4.12386
0.75	-11.9086	-3.72468
0.8	-10.33	-2.73876
0.85	-7.90336	-2.302
0.9	-0.594899	-2.74387
0.95	25.6062	-4.73105

## Sheet: OGAP
-15.3644	0.839988	10.1531	19.7748	20.8023	20.8571	11.4632	20.7485	21.0008	24.5164	14.3007	17.1009	10.0575	14.3855	18.9491	20.1368	18.134	32.5645	46.8438
-15.3644	0.839988	10.1531	19.7748	20.8023	20.8571	11.4632	19.4297	19.0312	24.5164	14.3007	17.1009	10.0575	14.3855	18.9491	18.1588	18.134	32.5645	46.8438
-15.3644	0.839988	7.09163	19.7748	20.8023	14.3784	11.4632	19.4297	19.0312	24.5164	14.3007	17.1009	10.0575	14.3855	18.9491	18.1588	18.134	32.5645	46.8438
-15.3644	0.839988	7.09163	19.7748	20.8023	14.3784	11.4632	19.4297	19.0312	24.5164	14.3007	17.1009	10.0575	14.3855	18.9491	18.1588	18.134	32.5645	46.8438
-15.3644	0.839988	7.09163	19.7748	20.8023	14.3784	11.4632	19.4297	19.0312	24.5164	14.3007	17.1009	10.0575	14.3855	18.9491	18.1588	18.134	32.5645	46.9224
-15.3644	0.839988	7.09163	19.7748	20.8023	12.2698	11.4632	19.4297	19.0312	24.5164	14.3007	17.1009	10.0575	14.3855	18.9491	18.1588	18.134	32.5645	46.9224
-15.3644	0.839988	7.09163	19.7748	15.3276	10.5897	11.4632	19.4297	19.0312	21.0883	14.3007	15.6902	10.0575	14.3855	18.9491	18.1588	18.134	32.5645	46.9224
-15.3644	0.839988	7.09163	19.7748	15.3276	10.5897	11.4632	19.4297	19.0312	21.0883	14.3007	15.6902	10.0575	14.3855	18.9491	18.1588	18.134	32.5645	46.9224
-15.3644	0.839988	7.09163	19.7748	15.3276	10.5897	11.4632	19.4297	19.0312	21.0883	14.3007	15.6902	10.0575	14.3855	18.9491	18.1588	18.134	32.5645	53.5956
-15.3644	0.839988	7.09163	19.7748	15.3276	10.5897	11.4632	19.4297	19.0312	21.0883	14.3007	15.6902	10.0575	14.3855	18.9491	14.8759	18.134	32.5645	53.5956
-15.3644	0.839988	7.09163	19.7748	15.3276	10.5897	11.4632	19.4297	19.0312	21.0883	14.3007	15.6902	10.0575	14.3855	18.9491	14.8759	18.134	32.5645	53.5956
-15.3644	0.839988	7.09163	19.7748	15.3276	10.5897	9.72334	19.4297	19.0312	21.0883	14.3007	15.6902	10.0575	14.3855	18.9491	14.8759	16.045	32.5645	53.5956
-15.3644	0.839988	7.09163	19.7748	15.3276	10.5897	9.72334	19.4297	19.0312	21.0883	14.3007	15.6902	10.0575	14.3855	18.9491	14.8759	16.045	32.5645	53.5956
-15.3644	0.839988	7.09163	19.7748	10.4839	10.5897	9.72334	19.4297	19.0312	21.0883	14.3007	15.6902	10.0575	14.3855	18.9491	14.8759	16.045	32.5645	56.9996
-15.3644	0.839988	7.09163	19.7748	10.4839	10.5897	9.72334	19.4297	19.0312	21.0883	14.3007	15.6902	10.0575	14.3855	18.9491	14.8759	16.045	32.5645	56.9996
-15.3644	0.839988	7.09163	19.7748	10.4839	10.5897	9.72334	19.4297	19.0312	21.0883	14.3007	15.6902	10.0575	14.3855	18.9491	14.8759	16.045	32.5645	56.9996
-15.3644	0.839988	7.09163	19.7748	5.21454	10.1443	9.72334	19.4297	19.0312	21.0883	14.3007	15.6902	10.0575	14.3855	18.9491	14.8759	16.045	32.5645	56.9996
-15.3644	0.839988	7.09163	19.7748	5.21454	10.1443	9.72334	19.4297	19.0312	21.0883	14.3007	15.6902	10.0575	14.3855	18.9491	14.8759	16.045	32.5645	56.9996
-15.3644	0.839988	7.09163	4.61535	5.21454	5.86767	9.72334	19.4297	19.0312	21.0883	14.3007	15.6902	10.0575	14.3855	18.9491	14.8759	16.045	40.6072	56.9996
	QQR	QR
0.05	17.2244	-15.3644
0.1	16.9473	0.839988
0.15	16.4452	7.09163
0.2	16.4452	19.7748
0.25	16.4493	20.8023
0.3	16.3383	14.3784
0.35	15.7071	11.4632
0.4	15.7071	19.4297
0.45	16.0583	21.0008
0.5	15.8855	24.5164
0.55	15.8855	20.6602
0.6	15.684	17.1009
0.65	15.684	10.0575
0.7	15.6082	14.9243
0.75	15.6082	18.9491
0.8	15.6082	20.1368
0.85	15.3074	18.134
0.9	15.3074	40.6072
0.95	14.7078	53.5956
