# Supplementary material for: Macroeconomic Imbalances and Financial Stress Among BRICS: Analysis of Frequency-Dependent and Asymmetric Causal Nexuses
Source: publisher site journal article supplement (doi:10.1515/snde-2024-0045), 2025-04-16
Supplement: Supplementary file 51 [file IMF1.xlsx]

## Sheet: CA
-2.10225	0.312724	1.9309	1.9309	2.63061	2.63061	2.63061	2.63061	2.63061	2.63061	2.63061	2.63061	2.63061	2.63061	2.63061	2.63061	2.63061	2.63061	2.63061
-2.10225	-10.5844	-10.5844	-10.5844	-4.02018	-4.02018	-4.02018	-4.02018	-4.02018	-2.39577	0.408495	0.408495	0.408495	0.408495	2.22918	2.22918	2.22918	2.22918	2.22918
1.40624	1.40624	1.40624	1.40624	1.40624	0.71607	0.614161	-1.68628	-1.68628	-1.68628	-1.68628	-1.68628	-1.68628	-2.39577	-3.38711	-3.38711	-1.22173	-0.71968	-0.71968
-4.61192	-16.4836	-8.34095	-3.15794	-3.15794	-3.15794	-4.44578	-5.10383	-4.78054	-4.63047	-4.49964	-1.49449	-2.32607	-1.51677	0.329458	0.329458	0.329458	0.329458	1.78514
-3.26964	-0.24186	-0.24186	-0.395698	0.506394	0.79628	0.636864	0.687903	0.54733	0.173766	0.173766	-1.22622	-1.12246	-1.12246	-3.02426	-3.02426	-3.02426	-3.40366	-3.40366
5.82755	5.82755	3.81795	3.81795	3.81795	3.65375	3.65375	3.79901	3.03411	3.03411	3.03411	1.9429	0.940401	0.42551	0.657205	1.27345	2.10723	1.01904	1.01904
-4.22844	-5.59207	-2.99506	-1.64789	-1.64789	-0.585897	-0.585897	-0.585897	-0.621473	0.242377	1.01119	0.296989	0.940401	1.67211	1.67211	1.26319	1.11064	1.11064	1.11064
5.69779	5.69779	5.69779	5.67979	3.02184	3.02184	3.02184	1.34272	1.34272	1.13872	0.547736	0.547736	0.547736	-0.450106	-0.450106	-1.06866	-1.06866	-2.8614	-2.8614
-0.639994	-0.639994	-0.048545	-0.048545	-0.048545	-0.048545	-0.048545	-0.048545	-0.048545	-0.048545	-0.048545	-0.048545	-0.048545	-0.048545	-0.048545	0.139366	0.248538	0.551742	0.551742
-1.7806	-0.312061	1.82547	0.721841	0.721841	0.721841	0.721841	-0.163762	-0.163762	-1.97947	-1.97947	-1.97947	-1.02118	-1.02118	-1.02118	-2.00948	-0.711193	-0.711193	-0.711193
0.692614	1.34837	1.34837	3.24126	0.273287	0.273287	0.273287	0.273287	0.273287	-0.184361	-0.184361	0.0878221	0.0878221	-0.44813	-0.44813	0.730013	0.730013	0.730013	0.730013
1.12603	1.12603	1.12603	1.12603	1.29118	0.320296	0.320296	1.14988	1.14988	2.46892	2.46892	0.762532	0.726971	1.1816	1.1816	-0.237155	1.13484	1.13484	1.13484
-5.83519	-5.83519	-5.83519	-6.15062	-4.96207	-0.504472	-0.504472	-0.504472	-0.504472	-0.955631	-0.955631	-0.955631	-0.955631	-0.955631	-0.955631	-0.180735	-0.180735	-0.634983	-0.634983
0.23535	0.609891	0.609891	1.47541	1.47541	0.472169	0.511639	0.511639	1.25269	1.94184	1.71655	1.40453	1.40453	1.40453	2.12779	2.12779	-0.544445	-0.544445	-0.544445
0.000149166	1.02778	1.02778	1.10032	1.10032	0.47915	0.102042	0.102042	0.102042	-0.665197	-0.665197	-0.665197	-0.665197	-1.08062	-1.08062	-1.2761	-1.2761	-1.68585	-1.98334
-2.92279	-2.92279	-2.92279	-2.92279	-2.09144	-2.09144	-2.09144	-2.09144	-2.09144	-0.366356	-0.366356	-0.366356	-0.490803	-0.515823	-0.481628	-0.239155	-0.239155	-0.239155	1.67762
-0.257532	-0.870504	-0.870504	-2.38579	0.134538	0.134538	-0.15492	-0.15492	-0.15492	-0.15492	-1.00451	-2.14413	-1.78074	-1.78074	-1.78074	-1.78074	2.98774	2.98774	2.98774
2.24821	2.24821	2.24821	2.24821	2.24821	1.86849	2.60961	8.03613	8.03613	8.03613	6.43296	6.43296	6.43296	6.43296	3.41336	3.41336	3.41336	3.41336	3.41336
-0.394871	-7.04303	-7.04303	-7.04303	-16.7991	-16.7991	-11.9981	-11.9981	-11.9981	-11.9981	-11.9981	-11.9981	-11.9981	-8.84311	-8.84311	-8.84311	-8.84311	-8.84311	-8.84311
	QQR	QR
0.05	2.18587	0.298176
0.1	-2.29328	0.167727
0.15	-0.715122	0.148174
0.2	-3.40026	0.0733889
0.25	-1.05147	0.058521
0.3	2.77382	0.0571197
0.35	-0.424222	0.0279938
0.4	1.50241	0.0427402
0.45	-0.0220886	0.0289803
0.5	-0.571177	0.0287015
0.55	0.517251	0.0124592
0.6	1.08913	0.0283136
0.65	-2.00007	0.0781071
0.7	0.928859	0.0457075
0.75	-0.315883	0.0572204
0.8	-1.25134	0.0360003
0.85	-0.318069	0.0900757
0.9	4.34875	0.134063
0.95	-10.1141	0.194327

## Sheet: CGD
-4.01939	-25.5783	-29.3725	-24.3678	-21.1247	-13.5893	-19.3027	-17.4807	-12.3445	-14.0445	-12.6047	-10.9083	-9.36942	-7.16337	-3.88135	-2.37588	-0.610258	4.95563	9.40211
-4.01939	-25.5783	-29.3725	-24.3678	-21.0433	-13.5893	-15.0702	-17.4807	-12.3445	-14.0445	-12.6047	-10.9083	-9.36942	-7.16337	-3.88135	-2.37588	-0.610258	4.95563	9.40211
-4.01939	-25.5783	-29.3725	-24.3678	-21.0367	-13.5893	-15.0702	-17.4807	-12.3445	-7.24503	-12.6047	-10.9083	-9.36942	-7.16337	-3.88135	-2.37588	-0.610258	4.95563	9.40211
-4.01939	-25.5783	-29.3725	-24.3678	-21.0367	-13.5893	-15.0702	-17.4807	-12.3445	-7.24503	-12.6047	-10.9083	-9.36942	-7.16337	-3.88135	-2.37588	-0.610258	4.95563	9.40211
-4.01939	-25.5783	-29.3725	-24.3678	-21.0367	-13.5893	-15.0702	-17.4807	-12.3445	-7.24503	-12.6047	-10.9083	-9.36942	-7.16337	-3.88135	-2.37588	-0.610258	4.95563	9.40211
-4.01939	-25.5783	-29.3725	-24.3678	-21.0367	-12.6388	-15.0702	-17.4807	-12.3445	-7.24503	-12.6047	-10.9083	-9.36942	-7.16337	-3.88135	-2.37588	0.902399	4.95563	9.40211
-4.01939	-25.5783	-29.3725	-24.3678	-21.0367	-12.6388	-15.0702	-17.4807	-12.3445	-7.24503	-12.6047	-10.9083	-9.36942	-7.16337	-3.88135	-2.37588	4.69174	4.95563	9.40211
-4.01939	-25.5783	-29.3725	-24.3678	-21.0367	-12.6388	-15.0702	-17.4807	-12.3445	-7.24503	-12.6047	-10.9083	-9.36942	-7.16337	-3.88135	-2.37588	4.69174	4.95563	9.40211
-4.01939	-25.5783	-29.3725	-24.3678	-21.0367	-12.6388	-15.0702	-17.4807	-12.3445	-7.24503	-12.6047	-10.9083	-9.36942	-7.16337	-3.88135	-2.37588	4.69174	4.95563	9.40211
-4.01939	-25.5783	-29.3725	-24.3678	-21.0367	-12.6388	-15.0702	-17.4807	-12.3445	-7.24503	-12.6047	-10.9083	-9.36942	-7.16337	-3.88135	-2.37588	4.69174	4.95563	9.40211
-4.01939	-25.5783	-29.3725	-24.3678	-21.0367	-12.6388	-15.0702	-17.4807	-12.3445	-7.24503	-10.6978	-10.9083	-9.36942	-7.16337	-3.88135	-2.37588	4.69174	4.95563	9.40211
-4.01939	-25.5783	-29.3725	-24.3678	-21.0367	-12.6388	-15.0702	-17.4807	-12.3445	-7.24503	-10.6978	-10.9083	-9.36942	-7.16337	-3.88135	-2.37588	4.69174	4.95563	9.40211
-4.01939	-25.5783	-29.3725	-24.3678	-21.0367	-12.6388	-15.0702	-17.4807	-12.3445	-6.71402	-10.6978	-10.9083	-9.36942	-7.16337	-3.88135	-2.37588	4.69174	4.95563	9.40211
-4.01939	-25.5783	-29.3725	-24.3678	-21.0367	-12.6388	-15.0702	-17.4807	-12.3445	-6.71402	-10.6978	-10.9083	-9.36942	-7.16337	-3.88135	-2.37588	4.69174	4.95563	9.40211
-4.01939	-25.5783	-29.3725	-24.3678	-21.0367	-12.6388	-15.0702	1.59952	-2.92566	-6.71402	-5.94912	-10.9083	-9.36942	-7.16337	-3.88135	-2.37588	6.40306	4.95563	9.40211
-4.01939	-25.5783	-29.3725	-24.3678	-21.0367	-12.6388	-15.0702	1.59952	-2.92566	-6.71402	-4.98139	-10.9083	-9.36942	-7.16337	-3.88135	-2.37588	6.40306	4.95563	9.40211
-4.01939	-25.5783	-29.3725	-24.3678	-21.0367	-12.6388	-15.0702	1.59952	-2.92566	-6.71402	-4.98139	-9.50612	-9.36942	-7.16337	-3.88135	-2.37588	6.40306	4.95563	9.40211
-4.01939	-25.5783	-29.3725	-24.3678	-21.0367	-12.6388	-15.0702	1.59952	-2.92566	-6.71402	-4.98139	-9.50612	-9.36942	-7.16337	-3.88135	-2.37588	6.40306	4.95563	9.40211
-4.01939	-25.5783	-29.3725	-24.3678	-21.0367	-12.6388	-15.0702	1.59952	-2.92566	-6.71402	-4.98139	-9.50612	-9.36942	-7.16337	-3.88135	-2.37588	6.40306	4.95563	9.40211
	QQR	QR
0.05	-11.2516	-4.01939
0.1	-11.0245	-25.5783
0.15	-10.6663	-29.3725
0.2	-10.6663	-24.3678
0.25	-10.6663	-21.0367
0.3	-10.5367	-12.6388
0.35	-10.3372	-15.0702
0.4	-10.3372	-17.4807
0.45	-10.3372	-12.3445
0.5	-10.3372	-7.24503
0.55	-10.2369	-12.6047
0.6	-10.2369	-10.9083
0.65	-10.2089	-9.36942
0.7	-10.2089	-7.16337
0.75	-8.36897	-3.88135
0.8	-8.31804	-2.37588
0.85	-8.24424	4.69174
0.9	-8.24424	4.95563
0.95	-8.24424	9.40211

## Sheet: OGAP
-6.97539	-6.97539	-6.97539	-6.97539	-6.97539	-6.97539	-6.97539	-6.97539	-6.97539	-6.97539	-6.97539	-6.97539	-6.97539	-6.97539	-6.97539	-6.97539	-6.97539	-6.97539	-6.97539
-6.97539	-6.97539	-6.97539	-6.97539	-6.97539	-6.97539	-6.97539	-6.97539	-6.97539	-6.97539	-6.97539	-6.97539	-6.97539	-6.97539	-6.97539	-6.97539	-6.97539	-6.97539	-6.97539
-1.26476	-1.26476	-1.26476	-1.26476	-1.26476	-1.26476	-1.26476	-1.26476	-1.26476	-1.26476	-1.26476	-1.26476	-1.26476	-1.26476	-1.26476	1.07728	1.07728	1.07728	1.07728
0.680821	3.44497	3.44497	3.44497	3.44497	3.44497	3.44497	3.44497	3.44497	-1.38378	-1.38378	-1.38378	-1.38378	-1.38378	-1.38378	-1.38378	-1.38378	-1.38378	-1.38378
-2.82183	-2.82183	-2.82183	-2.82183	-4.7637	-4.7637	-4.7637	-4.7637	-4.7637	-4.7637	-4.7637	-4.7637	-4.7637	-4.7637	-1.38378	-0.0315781	-0.0315781	0.382614	3.12384
2.5927	2.5927	2.5927	2.5927	2.18693	2.18693	2.18693	2.18693	2.18693	2.18693	2.18693	-16.6559	-16.6559	-16.6559	-16.6559	-16.6559	-16.6559	-8.58768	-8.58768
-2.60524	-2.60524	-2.60524	-2.60524	-2.60524	-2.60524	-4.54538	-4.54538	-4.54538	-4.54538	-4.54538	-4.54538	-4.54538	-4.54538	-2.59697	-2.59697	-1.235	-1.235	-4.49229
-0.816136	-0.816136	-0.944506	-0.689754	-0.689754	-0.689754	-0.689754	-0.689754	2.03484	2.56604	2.56604	2.56604	2.56604	2.56604	3.2502	3.2502	3.2502	3.2502	3.2502
-2.68681	-2.68681	-2.68681	-2.68681	-0.944506	3.55777	3.55777	3.55777	2.27001	2.27001	0.987664	0.987664	0.987664	-1.2435	-0.0159933	-0.0159933	-0.0159933	-0.0159933	-0.0159933
-1.11582	-2.0073	-3.54112	-0.606767	-0.606767	-2.8371	-2.8371	-2.42431	-1.91891	0.191255	0.191255	0.191255	0.191255	0.191255	0.191255	0.191255	0.489563	-0.82279	-0.82279
3.23562	3.23562	3.23562	3.23562	-1.11591	-1.11591	-0.316302	-0.316302	-0.316302	-1.91891	-2.03275	-3.24875	-3.24875	-3.24875	-3.24875	-1.38905	0.06622	0.06622	0.06622
0.250569	0.250569	2.95805	3.56654	3.56654	3.56654	2.82095	2.82095	2.82095	2.82095	2.82095	1.80056	1.80056	1.89775	1.89775	1.89775	1.89775	1.89775	1.89775
0.250569	0.250569	17.746	17.746	2.95805	2.14782	2.14782	2.14782	0.370727	0.370727	0.370727	0.370727	0.370727	0.370727	0.0272805	1.89775	1.89775	1.89775	1.89775
-3.15649	-3.15649	-3.15649	-5.31535	-5.31535	-5.31535	-6.40141	-6.40141	-6.40141	-6.40141	-6.40141	-6.40141	-6.40141	-6.40141	-6.40141	-6.40141	-0.090795	-0.968146	-0.968146
-1.28394	-1.28394	-1.28394	-1.28394	2.22315	19.5973	19.5973	19.5973	19.5973	19.5973	19.5973	19.5973	19.5973	19.5973	19.5973	19.5973	19.5973	19.5973	19.5973
6.36595	8.83036	9.54343	9.54343	20.6599	20.6599	20.6599	20.6599	20.6599	20.6599	20.6599	16.6059	16.6059	16.6059	16.6059	16.6059	4.14464	3.70521	-1.3446
2.45285	2.45285	2.45285	2.45285	2.45285	2.45285	2.45285	3.70521	3.70521	3.70521	3.70521	3.70521	3.70521	4.14464	4.14464	4.14464	4.14464	4.14464	4.14464
-2.07268	-2.07268	-2.07268	-2.07268	-2.07268	-2.07268	-2.07268	-2.07268	-2.07268	-2.07268	-2.07268	-0.180405	-1.07526	-1.07526	-1.07526	-1.15245	-1.15245	-1.15245	-1.15245
1.45542	1.45542	1.45542	1.45542	-4.60279	-4.60279	-4.60279	-4.60279	-4.60279	-4.60279	-4.60279	-4.60279	-4.60279	-4.60279	-4.60279	-4.60279	-4.60279	-4.60279	-4.60279
	QQR	QR
0.05	-6.97539	-0.62611
0.1	-6.97539	-0.620194
0.15	-0.771702	-0.219798
0.2	0.758041	-0.292027
0.25	-2.99289	-0.23638
0.3	-4.8122	-0.213496
0.35	-3.37635	-0.237081
0.4	1.32055	-0.154473
0.45	0.271638	-0.180405
0.5	-0.932233	-0.247785
0.55	-0.440807	-0.266191
0.6	2.27638	-0.173811
0.65	2.90723	-0.176816
0.7	-4.81351	-0.19819
0.75	14.2868	-0.182524
0.8	14.1283	-0.160051
0.85	3.38258	-0.231462
0.9	-1.62186	-0.298916
0.95	-3.32738	-0.411501
