# Supplementary material for: Macroeconomic Imbalances and Financial Stress Among BRICS: Analysis of Frequency-Dependent and Asymmetric Causal Nexuses
Source: publisher site journal article supplement (doi:10.1515/snde-2024-0045), 2025-04-16
Supplement: Supplementary file 52 [file IMF2.xlsx]

## Sheet: CA
-4.06008	-4.06008	-2.17028	-2.17028	-2.17028	-2.17028	0.617114	0.617114	0.617114	0.617114	0.617114	0.617114	0.617114	0.617114	0.617114	0.617114	0.617114	0.617114	0.617114
-4.06008	-4.06008	-4.06008	-4.06008	-2.17028	-2.17028	-2.17028	-2.17028	-2.17028	0.000114253	0.617114	0.617114	0.617114	0.617114	0.617114	0.617114	0.617114	0.617114	0.617114
2.40299	2.40299	2.40299	2.40299	2.40299	0.161199	3.18175	4.54645	4.54645	4.54645	4.54645	-4.14269	-3.17065	-2.63115	-2.63115	-2.63115	-2.63115	-2.63115	-2.63115
1.26277	1.26277	2.40299	2.8573	3.6031	3.6031	3.6031	0.980846	0.980846	-2.16317	-1.27185	-1.27185	-1.27185	-1.04815	-0.289349	-1.70204	-1.70204	0.114894	0.114894
-2.16396	-2.16396	-2.17632	-2.17632	-2.17632	-1.55473	-2.79392	-2.79392	-2.79392	-0.862902	-0.777265	-0.777265	-0.777265	-0.777265	-0.617281	2.52189	0.0052425	-0.131286	-0.131286
-0.555371	-0.555371	-0.555371	3.4836	3.4836	3.4836	3.67419	3.76557	2.98556	2.28851	1.83004	2.04717	2.68385	3.99663	4.21733	2.36537	0.863576	0.863576	0.863576
-1.48772	-4.65267	-5.85345	-6.00287	-5.70127	-7.35276	-7.75496	-6.77453	-7.2605	-7.2605	-6.62444	-6.62444	-6.62444	-6.62444	-10.4284	-4.31106	-4.31106	-3.30636	-3.30636
1.05939	2.23298	2.23298	2.23298	0.966407	0.966407	0.966407	2.63818	2.41812	2.41812	2.93916	2.17716	2.41326	2.66733	3.10743	3.10743	2.75528	2.9854	-0.220679
-0.292093	-0.292093	1.98491	1.48848	1.10853	-1.02135	-1.02135	-1.02135	-0.780566	-0.966658	-0.966658	-0.966658	-0.899231	0.239554	0.239554	0.239554	0.591021	2.41748	2.15823
1.19366	1.19366	1.19366	-0.261077	1.10853	1.10853	1.44839	1.73518	1.73518	1.62353	2.06914	0.360935	-1.43275	-0.309259	-0.309259	-2.70271	-2.54529	-2.07992	-2.07992
2.25793	2.25793	2.25793	2.25793	2.24028	1.63804	1.63804	0.710723	0.042409	-1.20598	-0.360233	-0.360233	0.366543	1.66749	2.52277	1.58705	1.58705	3.06688	1.78261
-0.539923	-0.659958	-0.659958	0.136029	0.662568	0.710723	0.710723	1.22344	1.8373	1.60159	0.569726	2.69163	0.50086	1.46079	1.46079	0.849055	0.834187	-0.640854	-0.00740825
1.68161	1.25398	0.936596	0.00817331	0.00817331	-0.485271	-0.386556	-0.671059	-0.623102	-0.236767	-0.236767	-2.84317	-2.07053	-1.73067	-0.84374	0.834187	2.04602	2.04602	1.28478
-1.55753	-2.20946	-0.766113	-0.501953	-0.501953	-1.25116	-1.25116	-0.671059	-0.343261	0.420376	0.0939292	-0.136785	1.04327	1.04327	1.04327	-1.14062	-1.93709	-1.93709	-0.30907
1.78961	1.78961	-1.41822	-1.48266	-1.5758	-1.5758	-1.5758	-2.70673	1.98042	3.70822	3.6726	2.20714	2.20714	1.75878	1.75878	4.58382	4.58382	4.58382	1.77092
-0.455449	-0.455449	-0.455449	-0.455449	-0.437736	-0.437736	-3.55114	-3.55114	-3.55114	-0.654104	-0.654104	0.25356	0.25356	0.25356	0.25356	0.25356	0.25356	0.25356	-0.416303
-0.621776	0.255411	0.255411	0.255411	0.244547	2.83606	2.83606	2.83606	5.14064	1.04215	-3.90991	-3.90991	-3.90991	-3.90991	-2.49913	-2.49913	-2.49913	-2.49913	-2.49913
-4.60155	-4.60155	-4.60155	-4.60155	-4.60155	-4.60155	-5.57794	-5.57794	-4.2687	-4.2687	-4.2687	-4.2687	0.451756	1.04215	0.0486731	0.0486731	0.0486731	0.0486731	0.0486731
4.70974	4.70974	4.70974	4.70974	4.70974	4.70974	4.70974	4.70974	4.70974	4.70974	2.89474	2.89474	2.89474	0.0486731	0.0486731	0.0486731	0.0486731	0.0486731	0.0486731
	QQR	QR
0.05	-0.462042	0.167342
0.1	-1.13356	0.124196
0.15	0.549655	0.0667052
0.2	0.529806	0.098317
0.25	-1.21674	0.0656284
0.3	2.16998	0.0222738
0.35	-5.90854	0.0514571
0.4	2.10862	0.0766049
0.45	0.117858	-0.0130395
0.5	0.160537	0.0406928
0.55	1.36606	0.0312009
0.6	0.670595	0.0320514
0.65	-0.00147839	-0.0141899
0.7	-0.572115	-0.027966
0.75	1.37156	-0.0477494
0.8	-0.700014	-2.15031e-05
0.85	-0.687123	0.034882
0.9	-2.84751	0.0851505
0.95	2.95125	0.0897848

## Sheet: CGD
-5.53945	-3.96295	-3.36066	-1.7471	-1.91083	-0.565497	0.666719	1.50126	2.23376	1.37351	2.28784	3.82569	3.11997	4.30402	8.05904	7.31542	6.5859	8.15779	10.3288
-5.53945	-3.96295	-3.36066	-1.90704	-1.91083	-0.565497	0.666719	1.50126	0.623688	1.32508	2.28784	3.82569	3.11997	4.30402	8.05904	5.96776	6.5859	8.15779	10.3288
-5.53945	-3.96295	-3.36066	-1.90704	-1.91083	-0.565497	0.666719	1.21002	0.623688	1.32508	2.28784	1.84663	3.11997	4.30402	7.38523	5.96776	6.5859	8.15779	10.3288
-5.53945	-3.96295	-3.36066	-1.90704	-1.91083	0.260762	0.666719	1.21002	0.287311	1.32508	2.28784	1.84663	2.96652	4.30402	7.38523	5.96776	6.5859	8.15779	10.3288
-5.53945	-3.92915	-3.36066	-1.7471	-1.91083	0.260762	0.666719	1.21002	0.287311	1.32508	2.18245	1.84663	2.96652	4.30402	4.55389	5.96776	6.5859	8.15779	10.3288
-5.53945	-3.92915	-3.36066	-1.7471	-1.91083	0.260762	0.666719	1.21002	0.287311	1.05799	0.734347	1.84663	2.96652	1.50253	4.55389	5.67025	6.5859	8.15779	10.3288
-5.53945	-3.92915	-3.36066	-1.7471	-1.91083	0.260762	0.666719	1.21002	0.287311	1.05799	0.647645	1.84663	0.351378	1.07452	4.55389	5.67025	6.5859	7.91147	10.3288
-5.53945	-3.92915	-3.36066	-1.7471	-1.15564	0.260762	0.666719	1.21002	0.287311	1.05799	0.647645	1.34562	0.351378	1.07452	4.55389	5.67025	6.5859	7.91147	10.3288
-5.53945	-3.92915	-3.36066	-1.7471	-1.15564	0.260762	0.666719	-0.326656	0.287311	-0.0709446	0.647645	1.34562	0.3324	1.07452	4.55389	5.67025	6.5859	7.91147	10.3288
-5.53945	-3.92915	-3.36066	-1.7471	-1.15564	0.260762	0.666719	-0.326656	0.287311	-0.0709446	0.265229	-0.738612	0.3324	-0.473494	3.51479	-0.670131	6.5859	7.91147	10.3288
-5.53945	-3.92915	-3.36066	-1.7471	-1.15564	0.780623	0.670316	-0.326656	0.184694	-0.0709446	0.0791332	-0.738612	0.3324	-0.473494	-4.67477	-6.11316	-4.38112	-8.22233	10.3288
-5.53945	-3.92915	-3.36066	-1.7471	-1.15564	0.780623	0.976054	-0.326656	0.184694	-0.0709446	0.0791332	-0.738612	0.305262	-0.473494	-5.09295	-6.11316	-6.32076	-8.22233	10.3288
-5.53945	-1.52788	-3.36066	-1.7471	-0.568838	0.780623	0.989349	-0.326656	0.184694	-0.411175	0.0791332	-0.742492	-1.67125	-1.15597	-5.09295	-6.11316	-6.32076	-8.22233	-10.1348
10.3689	8.31489	7.54942	5.08204	4.03985	0.780623	0.989349	-0.326656	0.184694	-0.411175	0.0211309	-0.742492	-1.67125	-2.48405	-5.09295	-6.11316	-6.32076	-8.22233	-10.1348
10.3689	8.31489	7.54942	5.08204	4.03985	0.780623	0.989349	-0.326656	0.184694	-0.411175	0.0211309	-0.742492	-1.67125	-2.48405	-5.09295	-6.11316	-6.32076	-8.22233	-10.1348
10.3689	8.31489	7.54942	5.08204	4.03985	1.6928	0.989349	-0.326656	0.184694	-0.411175	-0.801616	-0.742492	-1.86121	-2.48405	-5.09295	-6.11316	-6.32076	-8.22233	-10.1348
10.3689	8.31489	7.54942	5.43281	4.03985	1.6928	0.989349	-0.326656	0.184694	-0.411175	-0.801616	-0.742492	-1.86121	-2.48405	-5.09295	-6.14048	-6.32076	-8.6073	-10.1348
10.3689	8.76602	7.54942	5.43281	4.03985	2.72549	0.989349	-0.326656	0.184694	-0.411175	-0.801616	-0.745529	-1.86121	-2.48405	-5.09295	-6.14048	-6.32076	-8.6073	-10.1348
10.3689	8.76602	7.54942	5.43281	4.25558	2.72549	0.989349	-0.326656	0.184694	-0.411175	-0.801616	-2.56642	-1.86121	-2.48405	-5.44832	-6.14048	-6.32076	-8.6073	-10.1348
	QQR	QR
0.05	2.24596	-5.53945
0.1	2.07933	-3.92915
0.15	1.92437	-2.8237
0.2	1.94208	-1.7471
0.25	1.79771	-0.568838
0.3	1.54433	0.780623
0.35	1.36664	0.976054
0.4	1.38002	1.21002
0.45	1.23872	0.623688
0.5	0.639031	-0.0709446
0.55	-1.49248	0.734347
0.6	-1.60191	0.541795
0.65	-2.67903	0.3324
0.7	-0.220456	-0.176942
0.75	-0.220456	3.51479
0.8	-0.225747	-0.0168898
0.85	-0.228985	6.10462
0.9	-0.151049	7.91147
0.95	-0.254235	10.3288

## Sheet: OGAP
-25.759	-25.759	-25.759	-25.759	-25.759	-25.759	-25.759	-25.759	-25.759	-25.759	-25.759	-25.759	-25.759	-25.759	-25.759	-25.759	-25.759	-25.759	-25.759
-25.759	-25.759	-25.759	-25.759	-25.759	-25.759	-25.759	-25.759	-25.759	-25.759	-25.759	-25.759	-25.759	-25.759	-25.759	-25.759	-25.759	-25.759	-25.759
-0.188036	-0.188036	-0.188036	-0.188036	-0.188036	-0.188036	-0.188036	-0.188036	-0.188036	-0.188036	-0.188036	-0.188036	-0.188036	-0.188036	-0.188036	-0.188036	-0.846626	-0.846626	-0.846626
-0.0922254	-0.0922254	-0.0922254	-0.0922254	-0.0922254	-0.0922254	-0.0922254	-0.0922254	-0.0922254	-0.0922254	-0.0922254	-0.0922254	-0.0922254	-0.0922254	-0.0922254	-0.0922254	-0.0922254	-0.0922254	-0.0922254
-0.508746	-0.508746	-0.0922254	-0.0922254	-0.0922254	-0.0922254	-0.0922254	-0.0922254	-0.0922254	-0.0922254	-0.0922254	-0.0922254	-0.0922254	-0.0922254	-0.0922254	-0.0922254	-0.0922254	-0.0922254	-0.0922254
6.95783	6.95783	6.95783	6.95783	6.95783	6.95783	9.45502	9.45502	9.45502	9.45502	9.45502	9.45502	9.45502	9.45502	9.45502	9.45502	4.24413	4.24413	4.24413
-3.02881	-3.02881	-3.02881	-3.02881	-3.02881	-3.02881	-3.02881	-1.79531	-1.79531	-1.79531	-1.79531	-1.17823	-1.17823	-1.17823	-1.17823	-1.17823	-1.17823	-1.17823	-1.17823
0.480634	0.480634	1.33848	2.67107	2.67107	1.92102	1.92102	1.92102	1.92102	0.507343	-0.800169	-0.800169	-0.800169	-1.34541	-1.34541	-1.17823	0.992976	0.992976	0.992976
-3.2971	-3.2971	-3.2971	-2.15372	-2.15372	-0.575394	-0.575394	-0.575394	-4.6482	-4.6482	-4.6482	-4.6482	-4.6482	-4.6482	-4.6482	-1.07942	-1.07942	-1.07942	-1.07942
0.998187	0.998187	0.998187	0.722972	0.722972	0.722972	0.722972	0.722972	-1.89933	-0.344973	-0.344973	-0.460319	-0.98493	-0.98493	-0.98493	-2.08569	-4.0368	-4.0368	-4.0368
-1.34856	-2.49667	-2.49667	-2.49667	-2.49667	-2.49667	-1.04527	-1.86817	-1.86817	-1.07871	-1.07871	-1.07871	-1.07871	-1.07871	-1.07871	-1.07871	-1.07871	-1.07871	-1.07871
0.109551	0.906859	0.906859	0.906859	4.08671	4.08671	4.08671	4.08671	4.08671	4.08671	4.08671	4.08671	4.12585	4.12585	4.12585	4.12585	6.0212	4.34228	-0.311087
0.494333	0.494333	0.494333	0.494333	0.494333	-0.154386	-0.154386	-0.154386	-0.154386	-0.154386	-0.154386	-1.30232	-1.30232	-1.30232	-1.30232	-1.30232	-2.40128	-2.40128	-2.40128
0.889116	0.889116	0.889116	0.889116	0.889116	0.889116	0.174948	0.174948	0.174948	1.59881	2.9457	2.9457	2.25806	2.25806	2.25806	2.25806	2.25806	2.25806	2.25806
0.898441	-1.65824	0.040978	0.040978	0.040978	0.040978	0.040978	0.040978	0.040978	0.040978	0.040978	0.040978	0.040978	0.040978	0.040978	0.040978	0.040978	0.040978	0.040978
-2.82489	-2.82489	-2.82489	-2.82489	-2.82489	-2.82489	-2.82489	-2.82489	-2.82489	-2.82489	-2.82489	-2.82489	-2.82489	-2.82489	-2.82489	-2.82489	-2.82489	-2.82489	-2.82489
-0.988107	-0.988107	-0.988107	-0.988107	-0.988107	-0.988107	-0.988107	-0.988107	-0.988107	-0.988107	1.82512	1.82512	1.82512	1.82512	1.82512	1.82512	1.82512	1.82512	1.82512
2.08356	2.08356	2.08356	2.08356	2.08356	2.08356	4.46942	4.46942	4.46942	4.46942	-1.30394	-1.30394	-1.30394	-1.30394	-1.30394	-1.30394	-1.30394	-1.30394	-1.30394
2.08356	2.08356	-3.3769	-3.3769	-36.873	-36.873	-36.873	-36.873	-36.873	-36.873	-36.873	-36.873	-36.873	-36.873	-36.873	-36.873	-36.873	-36.873	-36.873
	QQR	QR
0.05	-25.759	0.0869298
0.1	-25.759	0.0807081
0.15	-0.292024	0.0546165
0.2	-0.0922254	0.10066
0.25	-0.13607	0.066341
0.3	7.84366	0.039209
0.35	-1.98993	0.114977
0.4	0.660142	0.115009
0.45	-2.77789	0.0442658
0.5	-0.715318	0.0272777
0.55	-1.5474	0.0250303
0.6	3.26735	0.0643987
0.65	-0.640531	0.0897971
0.7	1.53453	0.103662
0.75	-0.00332474	0.104282
0.8	-2.82489	0.0279264
0.85	0.344474	0.084933
0.9	0.98124	0.062536
0.95	-29.2464	0.216567
