# Supplementary material for: Macroeconomic Imbalances and Financial Stress Among BRICS: Analysis of Frequency-Dependent and Asymmetric Causal Nexuses
Source: publisher site journal article supplement (doi:10.1515/snde-2024-0045), 2025-04-16
Supplement: Supplementary file 53 [file IMF3.xlsx]

## Sheet: CA
-12	-12	-12	-12	-12	-12	-12	-12	-2.51416	1.8756	1.8756	1.8756	1.8756	1.8756	1.8756	1.8756	1.8756	1.8756	1.8756
-1.45161	-1.45161	-1.45161	-2.51416	-6.74226	-6.74226	-6.74226	-6.74226	-6.74226	-6.74226	-6.74226	-6.74226	0.612862	0.612862	0.612862	0.612862	0.612862	0.612862	0.612862
2.96527	2.96527	0.0123317	0.0123317	0.0123317	0.0123317	0.0123317	0.0123317	0.0123317	0.0123317	0.0123317	0.0123317	0.0123317	0.0123317	0.0123317	0.0123317	0.0123317	0.0123317	0.0123317
-12.4171	-12.4171	-12.4171	-12.4171	-12.4171	-12.4171	-12.4171	-12.4171	-12.4171	-12.4171	-12.4171	-12.4171	-12.4171	-12.4171	-12.4171	-12.4171	-12.4171	-12.4171	-0.491093
-6.4104	-6.4104	-6.4104	-6.4104	-6.4104	-6.4104	-6.4104	-6.4104	-6.4104	-5.27458	-5.27458	-5.27458	-5.27458	-5.27458	-5.27458	-5.27458	-5.27458	-5.27458	-5.27458
-9.85455	-9.85455	-9.85455	-9.2518	-9.2518	-9.2518	-9.2518	-0.801454	-1.79998	-1.79998	-1.79998	-1.56254	1.72443	1.72443	1.72443	8.39395	8.39395	8.39395	8.39395
0.949249	0.949249	0.949249	0.949249	4.19612	4.19612	4.44342	4.44342	7.30479	6.52588	6.52588	2.69738	4.71365	4.71365	4.71365	4.01292	4.01292	1.32188	1.32188
1.26131	1.26131	-5.85405	-4.29367	-4.29367	-6.13062	-3.08226	-3.08226	2.64227	2.88876	3.29322	1.54728	-0.39608	-0.196019	-0.0176121	0.0622639	2.03487	2.03487	1.23582
1.84099	1.63169	0.534248	-1.90128	-3.29214	-2.99437	-2.95801	-1.46958	-0.573834	-0.573834	-0.53103	-0.0247493	-0.0247493	0.231793	0.231793	-0.869916	0.436979	0.436979	1.08267
0.0255354	-1.21893	0.534248	2.93576	3.33956	3.33956	1.61319	1.61319	1.61293	1.61293	1.55876	1.89317	1.3167	0.50361	0.399052	0.399052	0.0711449	-0.906234	-1.08666
-1.55226	-4.18487	-4.18487	-4.68674	-3.55306	-3.31424	-3.98524	-3.98524	-0.970263	-0.552836	0.0930501	-0.0770749	-0.253096	-0.026271	0.302538	0.302538	0.302538	-5.20325	-5.17905
4.91713	4.91713	4.91713	3.85725	4.67432	4.67432	4.67432	2.03021	1.63001	1.24459	1.24459	1.24459	1.24459	2.49539	2.49539	0.827896	0.827896	3.63037	3.34008
5.9562	9.15829	10.6264	10.6264	10.6264	8.88296	2.95145	2.95145	0.934169	0.934169	-5.05668	-2.17602	-2.17602	-2.17602	-2.17602	-2.17602	-2.17602	0.27225	2.75508
14.861	14.861	14.861	8.27419	8.27419	2.36053	3.44693	-1.36771	-1.36771	-1.36771	-1.36771	3.25358	2.71922	2.71922	2.71922	-0.56834	0.240799	0.240799	0.240799
-7.07758	-7.07758	-7.07758	-12.3578	-12.3578	-12.3578	-12.3578	-12.3578	-12.3578	-12.3578	-12.9284	-12.9284	-8.35719	-8.35719	-8.35719	-8.35719	-8.35719	-8.35719	-8.35719
17.4834	17.4834	17.4834	17.4834	17.4834	17.4834	17.4834	17.4834	17.4834	17.4834	17.4834	17.4834	17.4834	17.4834	17.4834	17.4834	17.4834	17.4834	17.4834
-5.65066	-5.65066	-5.65066	-5.65066	-5.65066	-5.65066	-5.65066	-5.65066	-5.65066	-5.65066	-5.65066	-5.65066	-5.65066	-5.65066	-5.65066	-5.65066	-5.65066	-5.65066	-5.65066
0.387991	0.387991	0.694296	1.84456	1.84456	1.84456	1.84456	1.84456	1.84456	1.84456	1.84456	1.84456	1.84456	1.84456	1.84456	1.84456	-0.458963	-0.458963	-0.458963
2.45852	2.45852	2.45852	2.45852	2.45852	2.45852	2.45852	2.45852	2.45852	2.45852	2.45852	2.45852	-0.888991	-0.888991	-0.888991	-0.888991	-0.888991	-0.888991	-0.888991
	QQR	QR
0.05	-4.19782	0.3754
0.1	-2.97458	0.208981
0.15	0.323168	0.0439231
0.2	-11.7894	0.0183259
0.25	-5.8126	-0.0279086
0.3	-1.87293	-0.0217035
0.35	3.62845	-0.0338896
0.4	-0.478119	-0.0803259
0.45	-0.46244	-0.11972
0.5	1.02929	-0.143255
0.55	-2.14251	-0.143421
0.6	2.8888	-0.131952
0.65	2.55591	-0.165374
0.7	3.84386	-0.0507654
0.75	-10.1102	-0.0732865
0.8	17.4834	0.00924065
0.85	-5.65066	0.10021
0.9	1.26698	0.165883
0.95	1.22523	0.285388

## Sheet: CGD
-13.7388	-9.25068	-8.1261	-7.89873	-6.69813	-6.12648	-5.3753	-3.66544	-2.6364	-2.02425	-0.98874	1.18473	1.58499	3.12819	4.60467	5.0145	7.16553	9.34806	14.3581
-13.7388	-9.25068	-8.1261	-7.89873	-6.65495	-6.12648	-5.3753	-3.66544	-2.6364	-2.02425	-0.98874	0.966635	1.58499	3.12819	4.60467	5.0145	7.16553	9.34806	14.3581
-13.7388	-9.25068	-8.1261	-7.89873	-6.65495	-6.12648	-5.3753	-3.66544	-2.6364	-2.02425	-0.98874	0.966635	1.35998	3.12819	4.60467	5.0145	7.16553	9.34806	14.3581
-13.7388	-9.25068	-8.1261	-7.89873	-6.65495	-6.12648	-4.15756	-3.66544	-2.6364	-2.02425	-0.98874	0.880671	1.35998	2.05617	4.60467	5.0145	7.03158	8.59352	11.7458
-13.7388	-9.25068	-8.1261	-7.89873	-6.65495	-5.73109	-4.13109	-3.66544	-2.6364	-2.02425	-0.98874	0.880671	1.33798	2.04268	3.50392	5.0145	7.03158	8.59352	-11.9896
-13.7388	-9.25068	-8.1261	-7.89873	-6.51905	-5.73109	-4.13109	-3.65271	-2.6364	-2.02425	-0.98874	0.708524	1.21429	2.04268	3.50392	5.0145	-2.31296	-8.43285	-11.9896
-13.7388	-9.25068	-8.1261	-7.54031	-6.51905	-5.73109	-4.10808	-3.63841	-2.55295	-2.02425	-0.98874	0.432356	1.17412	2.04268	3.50392	3.24028	-7.04094	-8.67826	-14.6701
-13.7388	-9.25068	-8.1261	-7.54031	-5.71128	-1.51327	-3.30326	-3.48967	-2.53807	-1.30689	-0.98874	0.432356	0.712	-0.791263	-4.12467	-5.04948	-7.32143	-8.67826	-14.9626
17.774	13.3909	11.4637	8.33806	6.01932	3.87405	-0.599598	-1.72398	-2.53807	-1.30689	-0.652333	0.371041	0.219463	-1.02416	-4.27356	-6.7646	-7.32143	-9.81659	-14.9626
17.774	13.3909	11.5863	10.4686	7.02246	4.27064	2.63971	-1.32102	-2.21417	-1.30159	-0.501256	0.371041	-0.029249	-1.02812	-4.27356	-6.7646	-7.41453	-9.81659	-14.9626
17.774	13.3909	11.5863	10.9098	7.96285	6.06621	5.5244	1.79787	0.57012	-0.503126	-0.500481	0.270942	-0.127358	-1.02812	-4.34126	-6.8139	-7.41453	-9.81659	-14.9626
17.774	13.3909	11.6745	10.9098	9.67111	7.72132	6.74796	2.95445	2.42468	1.81818	-0.172721	0.270942	-0.127358	-2.06419	-4.40479	-6.8139	-7.41453	-9.81659	-14.6701
17.774	13.3909	11.6745	10.9316	9.95967	9.21003	6.79566	5.46094	3.30182	1.81818	1.15314	0.270942	-0.127358	-2.62063	-4.40479	-6.8139	-7.41453	-8.67826	-14.6701
17.774	13.4644	11.6745	10.9316	10.0026	9.21003	8.22077	5.52896	4.60758	2.54509	1.15314	-0.0163713	-0.516751	-2.62063	-4.40479	-6.8139	-7.32143	-8.67826	-11.9896
17.774	13.4644	11.6745	11.0432	10.1857	9.44927	8.22077	6.20641	4.81679	3.84249	2.14361	-0.0163713	-0.516751	-2.62063	-4.40479	-6.8139	-7.32143	-8.67826	-11.9896
17.774	13.4644	11.6745	11.0432	10.1857	9.44927	8.98277	7.76554	5.48838	3.84249	2.14361	-0.0163713	-0.516751	-2.06419	-4.40479	-6.8139	-7.32143	-8.67826	-11.9896
17.774	13.3909	11.6745	11.0432	10.1857	9.63578	9.01509	7.76554	5.57693	4.30226	2.14361	-0.0163713	-0.516751	-2.06419	-4.40479	-6.8139	-7.32143	-8.67826	-11.9896
17.774	13.3909	11.6745	11.0432	10.3214	9.63578	9.01509	8.05185	5.57693	4.30226	2.26518	0.270942	-0.516751	-2.06419	-4.34126	-6.7646	-7.32143	-8.67826	-11.9896
17.774	13.3909	11.6745	11.0432	10.3214	9.63578	9.01509	8.05185	5.93949	4.31953	2.65045	0.270942	-0.516751	-1.02812	-4.34126	-5.26958	-7.32143	-8.67826	-11.9896
	QQR	QR
0.05	-1.06001	17.774
0.1	-1.06922	13.0023
0.15	-1.08106	11.4637
0.2	-1.26217	8.50005
0.25	-2.549	7.40356
0.3	-3.94469	5.02549
0.35	-4.43234	0.807027
0.4	-5.12055	-0.0538103
0.45	0.550877	-0.626744
0.5	0.941911	-0.711795
0.55	1.59713	0.0510876
0.6	2.09861	0.552272
0.65	2.4743	0.175773
0.7	2.77636	-0.645393
0.75	2.97154	-2.95917
0.8	3.15834	-4.43618
0.85	3.19485	-6.86947
0.9	3.24451	-8.43285
0.95	3.418	-11.9896

## Sheet: OGAP
-51.9973	-51.9973	-51.9973	-51.9973	-51.9973	-51.9973	-51.9973	-51.9973	-51.9973	-51.9973	-51.9973	-51.9973	-51.9973	-51.9973	-51.9973	-51.9973	-51.9973	-51.9973	-51.9973
-0.172261	-0.172261	-0.172261	-0.172261	-0.172261	-0.172261	-0.172261	0.868187	0.868187	0.868187	0.50692	0.50692	0.50692	0.50692	0.50692	0.50692	0.50692	0.50692	0.50692
4.58501	4.58501	4.58501	5.02084	8.59946	8.59946	8.59946	8.59946	8.59946	5.34918	5.34918	5.34918	5.34918	5.34918	5.34918	5.34918	5.34918	5.34918	5.34918
-1.64958	-1.64958	-1.64958	-1.64958	-1.64958	-1.64958	-1.64958	-1.64958	-1.64958	0.6434	0.6434	0.6434	0.6434	0.6434	0.6434	0.6434	0.6434	0.6434	0.6434
-0.679372	-0.679372	-0.679372	-0.679372	-0.679372	-0.679372	-1.60393	-1.60393	-1.60393	-1.60393	-1.60393	-1.60393	-1.60393	-1.60393	-0.068338	-0.068338	-0.068338	-0.068338	-0.068338
-5.9866	-5.9866	-5.9866	-5.9866	-11.0627	-11.0627	-11.0627	-11.0627	-11.0627	-11.0627	-8.86706	-8.86706	-8.86706	-8.86706	-8.86706	-8.86706	-8.86706	-8.86706	-8.86706
-0.194767	-1.93265	-1.93265	-1.93265	0.657659	3.53651	3.53651	3.53651	3.53651	3.53651	3.53651	3.53651	7.89472	7.89472	8.38098	8.38098	8.38098	8.38098	2.76922
-0.469493	-0.469493	-0.469493	-0.469493	-2.30759	-2.30759	-2.30759	-3.93749	-0.301218	-3.81774	-3.81774	-3.81774	-3.81774	-3.81774	-3.81774	-3.81774	-3.81774	-3.81774	-3.81774
3.58998	3.58998	3.58998	3.58998	3.58998	3.58998	3.58998	3.58998	3.58998	3.58998	-0.724732	-0.724732	-0.724732	-0.724732	1.39068	1.39068	1.39068	1.39068	1.39068
2.30051	2.30051	2.30051	2.30051	2.30051	2.30051	2.30051	2.00693	2.00693	-0.180438	-0.180438	-0.180438	-0.180438	-0.180438	0.721313	0.721313	0.721313	0.721313	0.721313
-0.316903	-0.316903	-0.316903	-0.316903	-4.77831	-4.77831	-4.77831	-4.77831	-4.77831	-4.77831	-4.77831	-4.77831	-4.77831	-4.77831	-4.77831	-7.15392	-7.15392	-7.15392	-2.30752
-0.077455	-0.077455	-0.077455	0.0971439	0.630803	0.630803	0.630803	0.630803	0.630803	0.630803	0.630803	5.10448	5.10448	7.23664	7.23664	7.23664	7.23664	7.23664	7.23664
0.659698	5.87943	5.87943	5.87943	5.87943	5.87943	4.13206	4.13206	4.13206	4.13206	2.82717	2.82717	-1.73553	-1.73553	-2.64816	-2.64816	-2.64816	-2.64816	-2.64816
8.34042	8.34042	8.34042	8.34042	8.34042	8.34042	8.34042	8.34042	8.34042	8.34042	8.34042	8.34042	8.34042	8.34042	8.34042	8.34042	8.34042	8.34042	1.75814
0.0380224	0.0380224	0.0380224	0.0380224	0.0380224	0.0380224	0.0380224	0.0380224	0.0380224	0.0380224	0.0380224	0.0380224	0.0380224	0.0380224	0.0380224	0.0380224	0.0380224	0.0380224	0.0380224
25.3881	25.3881	25.3881	25.3881	25.3881	25.3881	25.3881	25.3881	25.3881	0.4204	-0.0847625	-0.0847625	-0.0847625	-0.0847625	-0.0847625	-0.0847625	-0.0847625	-0.0847625	-0.0847625
-2.49327	-2.49327	-2.49327	-6.88881	-6.88881	-6.88881	-6.88881	-8.27299	-8.27299	-8.27299	-8.27299	-8.27299	-8.27299	-8.27299	-8.27299	-8.27299	-8.27299	-8.27299	-8.27299
-1.85648	-1.85648	-1.85648	-1.85648	-1.85648	-1.85648	-1.85648	-1.85648	-1.85648	-1.85648	-1.85648	-1.85648	-1.85648	-1.85648	-1.85648	-1.85648	-1.85648	-1.85648	-1.85648
1.34274	1.34274	1.34274	1.34274	1.34274	1.34274	1.34274	1.34274	1.34274	1.34274	1.34274	1.34274	1.34274	1.34274	1.34274	1.34274	1.34274	1.34274	1.34274
	QQR	QR
0.05	-51.9973	0.145657
0.1	0.313738	0.106017
0.15	6.06657	0.0828619
0.2	-0.442747	0.0894656
0.25	-0.907862	0.0875131
0.3	-8.95401	0.0973414
0.35	3.76332	0.0607099
0.4	-2.69562	0.0419756
0.45	2.10285	0.0439432
0.5	1.20115	0.0260874
0.55	-4.08412	0.0159014
0.6	3.04785	0.104578
0.65	1.86987	0.00422111
0.7	7.99398	0.146304
0.75	0.0380224	0.182873
0.8	12.0079	0.118986
0.85	-7.069	0.112855
0.9	-1.85648	0.0849505
0.95	1.34274	0.0779109
