# Supplementary material for: Macroeconomic Imbalances and Financial Stress Among BRICS: Analysis of Frequency-Dependent and Asymmetric Causal Nexuses
Source: publisher site journal article supplement (doi:10.1515/snde-2024-0045), 2025-04-16
Supplement: Supplementary file 54 [file IMF4.xlsx]

## Sheet: CA
-2.21132	-2.21132	-2.21132	-2.21132	5.3828	5.47151	4.08555	4.22	4.22	4.77535	5.35378	5.35378	5.35378	6.07167	7.70287	7.70287	8.8682	9.29835	9.29835
-0.718897	-0.718897	-0.718897	-5.62605	-5.62605	-7.53574	-7.53574	-7.53574	2.97558	2.2682	0.654889	0.654889	0.500112	0.500112	0.500112	0.500112	0.500112	0.500112	0.500112
-0.363882	-0.363882	-0.363882	-0.363882	9.40134	9.40134	0.178678	0.178678	0.178678	0.178678	0.178678	0.178678	0.178678	0.178678	0.178678	0.178678	0.178678	0.178678	0.178678
-10.8487	-10.8487	-10.8487	-10.8487	-10.8487	-13.2878	-13.2878	-13.2878	-18.4503	-18.4503	-15.0972	-13.4838	-13.4838	-13.4838	-13.4838	-13.4838	-6.76631	-6.76631	-6.76631
-1.25227	-1.25227	-1.25227	-1.25227	-1.25227	-1.25227	-1.25227	-9.06726	0.787835	0.787835	0.787835	0.787835	4.51207	4.51207	4.51207	-0.024673	-0.024673	-0.024673	-0.024673
18.2391	18.2391	18.2391	18.2391	18.2391	18.2391	18.2391	18.2391	18.2391	18.2391	18.2391	18.2391	18.2391	12.9678	12.9678	12.9678	12.9678	12.9678	12.9678
-3.71886	-3.71886	-3.71886	-3.71886	-3.71886	-3.71886	-3.71886	-3.71886	18.6482	18.6482	18.6482	18.6482	18.6482	18.6482	18.6482	18.6482	18.6482	18.6482	18.6482
-1.24279	-0.937747	-0.937747	-0.937747	-0.937747	-0.937747	23.5361	23.5361	23.5361	23.5361	23.5361	23.5361	23.5361	23.5361	23.5361	23.5361	23.5361	23.5361	23.5361
-0.948537	-0.948537	-0.948537	-0.948537	-1.26653	-1.26653	-1.32726	0.17105	2.97333	2.54051	2.5378	2.5378	2.05596	2.05596	2.05596	18.814	18.814	18.6724	18.6724
-0.241413	-0.241413	-0.241413	-0.241413	-4.41344	-3.98058	-0.743056	-0.743056	-0.743056	-0.743056	-3.2081	-12.6601	-12.6601	-6.32885	1.18928	-11.0291	-11.0291	-11.0291	-11.0291
0.0474274	0.0474274	0.0474274	0.122458	0.122458	0.122458	0.122458	0.107851	-0.262528	-0.262528	-0.262528	-0.262528	-0.262528	-11.7012	-11.7012	-11.7012	-16.7303	-16.7303	-16.3592
7.34091	1.29392	1.18132	1.18132	1.18132	1.18132	1.18132	1.18132	1.18132	1.18132	1.18132	-6.37004	-6.37004	-0.154764	-0.154764	-0.154764	-0.154764	-0.154764	-0.154764
19.4894	19.4894	19.4894	19.4894	15.7177	17.0201	17.0201	17.0201	3.18451	3.18451	3.18451	3.18451	2.27624	3.46073	-0.885415	-0.885415	-0.885415	-0.885415	-0.885415
2.58039	2.58039	2.58039	2.58039	2.58039	2.58039	2.58039	2.58039	2.58039	2.58039	2.58039	2.58039	2.58039	2.58039	2.58039	2.58039	2.58039	2.58039	2.58039
-0.241331	-0.241331	-0.777105	-0.777105	-0.777105	-0.777105	-0.777105	-0.777105	-0.777105	-0.777105	-0.777105	-0.777105	-0.777105	-0.777105	-0.777105	-0.777105	-0.777105	-0.777105	-0.222348
-0.20691	-0.841488	-0.841488	-0.841488	-0.841488	-0.841488	-0.841488	-0.841488	-0.841488	-0.841488	-0.841488	-0.841488	-0.841488	-0.841488	-0.841488	-0.841488	-0.841488	-0.841488	-0.841488
-0.167641	-0.167641	-0.167641	-0.870376	-0.870376	-0.870376	-0.870376	-0.870376	-0.870376	-0.870376	-0.870376	-0.870376	-0.870376	-0.870376	-0.870376	-0.257703	-0.257703	-0.257703	-0.257703
-0.115985	-0.115985	-0.115985	-0.115985	-0.866374	-0.866374	-0.866374	-0.866374	-0.866374	-0.866374	-0.866374	-0.866374	-0.866374	-0.292361	-0.292361	-0.292361	-0.292361	-0.292361	-0.292361
0.275226	0.275226	0.275226	0.275226	0.275226	0.275226	0.275226	0.275226	0.275226	0.275226	-0.8116	-0.8116	-0.8116	-0.8116	-0.8116	-0.8116	-0.8116	-0.8116	-0.8116
	QQR	QR
0.05	4.43756	-0.431803
0.1	-1.3664	-0.400939
0.15	1.03526	-0.399537
0.2	-12.3064	-0.287993
0.25	-0.0654885	-0.316433
0.3	16.5745	-0.321106
0.35	9.23051	-0.35198
0.4	15.7914	-0.379303
0.45	4.43403	-0.397202
0.5	-4.74296	-0.413695
0.55	-4.4998	-0.460082
0.6	0.294635	-0.499397
0.65	8.35702	-0.526159
0.7	2.58039	-0.54977
0.75	-0.69151	-0.308507
0.8	-0.808089	-0.146062
0.85	-0.630434	-0.0651551
0.9	-0.52713	-0.0373741
0.95	-0.239586	-0.0236705

## Sheet: CGD
26.097	26.0813	25.6645	24.9035	23.0616	22.9209	22.3947	22.4038	24.0464	3.33416	-23.3083	-19.5219	-16.2635	-14.3531	-12.7781	-10.9239	-8.90373	-4.12926	-1.49494
26.097	26.1136	25.9425	25.0428	24.2315	23.0262	22.3947	22.4038	24.0464	10.5797	-16.2479	-19.5219	-16.2635	-14.3531	-12.7781	-10.9239	-8.80491	-4.12926	-1.49494
26.097	26.1136	25.9425	25.0428	24.2315	23.0262	23.2676	23.6144	24.9376	13.3914	-12.6327	-19.4225	-16.2635	-14.3531	-12.7781	-10.9239	-8.80491	-4.12926	-1.49494
26.097	26.1136	25.9425	25.0428	24.6416	23.0262	23.2676	23.6144	25.1403	13.3914	-4.26609	-19.4225	-16.2635	-14.3531	-12.7781	-10.9239	-8.80491	-4.12926	-1.49494
26.097	26.1136	25.9425	25.0428	24.6416	23.0262	23.2676	24.5289	25.6643	21.0371	-4.26609	-19.4225	-16.1819	-14.3531	-12.7781	-10.9239	-8.80491	-4.12926	-1.49494
26.097	26.1136	25.9425	25.2053	24.6416	23.0262	23.7954	24.5289	26.6626	21.0371	-1.34271	-19.4225	-16.1819	-14.3531	-12.7781	-10.9239	-8.80491	-4.12926	-1.49494
26.097	26.1136	25.9425	25.2053	24.8389	23.9222	23.7954	24.5289	26.6626	21.0371	-1.34271	-18.9812	-15.9325	-14.3531	-12.7781	-10.9239	-8.80491	-4.12926	-1.49494
26.3194	26.1136	26.5663	26.0835	24.8389	24.4887	23.7954	24.5289	26.6626	25.408	6.96898	-17.9069	-15.9325	-14.3531	-12.7781	-10.9239	-8.80491	-4.12926	-1.49494
26.3194	26.1136	26.8437	26.0835	24.8389	24.4887	23.7954	24.9604	26.6626	25.408	6.96898	-16.5194	-15.9325	-14.3531	-12.7781	-10.9239	-8.80491	-4.12926	-1.49494
26.3194	26.3	26.8437	26.0835	24.8389	25.1854	23.7954	24.9604	26.6626	29.3217	6.96898	-15.066	-15.9325	-14.3531	-12.7781	-10.9239	-8.80491	-4.12926	-1.49494
26.3194	26.3	26.8437	26.0835	24.8389	25.1854	23.7954	24.9604	26.7954	29.3217	6.96898	-9.28272	-15.9325	-14.3531	-12.7781	-10.9239	-8.80491	-4.12926	-1.49494
26.3194	26.3	26.8437	26.0835	25.3047	25.1854	25.9174	24.9604	26.7954	29.3217	10.6856	-8.77415	-15.9325	-14.3531	-12.7781	-10.9239	-8.80491	-4.12926	-1.49494
26.3194	26.3	26.8437	26.0835	25.3047	25.1854	25.9174	24.9604	26.7954	29.3217	15.9832	-8.30127	-15.9325	-14.3531	-12.7781	-11.281	-8.80491	-4.12926	-1.49494
26.3194	26.3	26.8437	26.0835	25.3047	25.1854	25.9174	27.0876	28.1558	29.3217	15.9832	-8.30127	-15.9325	-14.3531	-12.7781	-11.281	-8.80491	-4.12926	-1.49494
26.3194	26.3	26.8437	26.0835	25.3047	25.1854	25.9174	27.0876	29.4755	29.3217	15.9832	-2.96261	-15.9325	-14.3531	-13.0423	-11.689	-8.80491	-4.12926	-1.49494
26.3194	26.3	26.8437	26.0835	26.4593	25.1854	25.9174	27.0876	29.4755	29.3217	15.9832	-2.96261	-15.9325	-14.3531	-13.0423	-11.689	-8.80491	-4.12926	-1.49494
26.3194	26.3	26.8437	26.0835	26.4593	25.1854	25.9174	27.0876	29.4755	30.7422	15.9832	-2.96261	-15.9325	-14.3531	-13.0423	-11.689	-8.80491	-4.12926	-1.49494
26.3194	26.3	26.8437	26.0835	26.4593	25.1854	25.9174	27.0876	29.4755	29.3217	15.9832	-0.391042	-15.8477	-14.3531	-13.0423	-11.689	-8.80491	-4.12926	-1.49494
26.3194	26.3	26.8437	26.0835	26.4593	25.1854	25.9174	27.0876	29.4755	29.3217	15.9832	-0.391042	-15.8477	-14.3531	-13.0423	-11.689	-8.80491	-4.20942	-1.49494
	QQR	QR
0.05	5.74901	26.097
0.1	6.59793	26.1136
0.15	7.09798	25.9425
0.2	7.57058	25.7376
0.25	8.05299	24.6416
0.3	8.29572	23.9222
0.35	8.38962	23.2676
0.4	9.23424	24.3688
0.45	9.34458	26.5833
0.5	9.67354	17.8536
0.55	9.98491	-4.698
0.6	10.3435	-18.1295
0.65	10.6284	-15.9925
0.7	10.812	-14.3531
0.75	11.127	-12.7781
0.8	11.1878	-11.4
0.85	11.2625	-8.90373
0.9	11.3276	-4.12926
0.95	11.3234	-1.49494

## Sheet: OGAP
-2.35871	-2.35871	-2.35871	-2.35871	-2.35871	-2.35871	-1.68648	-2.4111	-2.4111	2.83144	2.83144	3.63	3.63	3.63	2.70515	2.70515	2.70515	2.70515	2.70515
-2.35871	-2.35871	-1.29465	-1.29465	-1.68648	-1.68648	-1.68648	-1.68648	-1.75916	2.42421	2.83144	2.29122	2.29122	2.29122	2.29122	1.99431	1.99431	1.99431	1.99431
-4.4615	-4.52994	-4.52994	-4.63158	-5.25481	-5.10736	-3.93132	-3.93132	-3.55349	-3.88733	-3.88733	-3.88733	1.75391	1.71681	1.71681	1.71681	1.71681	1.71681	1.71681
-5.15659	-5.15659	-5.15659	-5.15659	-4.80632	-4.80632	-5.25481	-5.10736	-4.90564	-7.52375	-7.52375	-7.4421	-7.4421	-7.4421	-4.92815	-6.61924	1.55256	1.59901	1.59901
-2.74643	-2.74643	-2.20339	-2.77295	-2.50496	-2.50212	-1.49949	-2.12082	-2.39092	-0.890507	2.5932	2.84823	2.84823	-0.666964	-0.749162	0.758403	1.55256	1.59901	4.21998
-1.23397	-1.23397	-1.29039	0.667106	0.667106	2.00104	2.26448	1.52213	4.00043	3.46024	2.90978	7.7803	13.5383	10.8284	12.7925	8.50458	11.8953	11.8953	6.24544
-0.555988	-0.823097	-0.0185717	2.60487	2.40419	2.26448	5.65611	5.50012	2.29014	2.39749	8.21475	6.07131	6.07131	3.39125	1.27464	1.18468	1.18468	0.582608	1.12833
-0.243021	-0.383122	-0.199891	2.35248	1.72286	1.72286	-0.639428	-0.639428	2.12675	2.12675	-3.74068	1.20908	0.0441581	-1.74177	-1.73172	-1.73172	-1.97796	0.0904199	0.282317
-0.243021	-0.136035	-0.199891	-1.4645	1.72286	1.77451	0.306188	-0.322647	2.12675	2.15055	2.13884	0.0441581	-1.74177	-1.68046	-1.68046	-1.34883	-0.594989	-0.194376	-0.0580507
-0.0383776	0.0458533	-0.106202	2.64583	0.404073	1.82549	1.97986	1.32161	2.25492	2.25492	2.202	-1.96204	-1.96204	-2.13522	-0.80024	0.482585	0.482585	-0.318853	-0.318853
0.129969	1.12993	-0.106202	-0.728521	5.32182	2.92191	2.48675	2.48675	1.15053	2.25492	2.3518	-2.84309	-2.57213	-2.80704	-2.80704	0.952743	0.952743	-0.61488	-0.61488
0.129969	-0.0369615	-0.0369615	-0.728521	5.32182	4.80594	3.64832	4.78209	1.15053	0.303951	2.45797	2.38414	-3.3359	-0.132471	-1.11763	0.886075	0.820597	-0.81539	-0.943168
0.30526	-0.115444	-2.80181	-3.48752	-4.78805	-4.78805	-5.23323	4.78209	6.46965	6.46965	3.66816	3.20045	3.81675	4.86808	2.72175	-0.0638635	0.692388	-0.669055	-0.793262
0.548118	0.414283	-0.164695	-2.46896	-4.78805	-4.77936	-6.83546	-7.46902	-7.88927	-11.1804	-11.9686	-10.4882	-4.28839	-4.28839	-2.67432	-3.73145	-1.85748	0.639342	0.367142
0.548118	0.737833	-0.164695	0.0298654	0.139301	0.0709937	-0.853131	-0.343829	-3.14599	-5.23697	-3.06805	-5.00023	-13.5015	-11.9538	-13.0547	-13.0526	-4.21542	0.584729	0.584729
1.01589	1.01589	1.43319	1.43319	0.379916	0.379916	1.3602	1.3602	1.3602	0.829799	1.84344	1.64581	1.64581	-1.46107	3.30984	15.1351	1.73592	0.584729	0.584729
14.334	14.334	14.69	14.6063	16.2274	16.2274	14.4424	14.4424	18.5114	18.5114	15.2803	14.8179	14.8179	22.6769	20.1919	15.1351	0.49959	0.49959	0.49959
14.334	14.2638	14.2638	13.0751	12.8714	0.426927	0.384633	0.384633	0.404513	0.404513	0.404513	0.404513	0.404513	0.368297	0.368297	0.368297	0.368297	0.368297	0.368297
0.368488	0.368488	0.306132	0.306132	0.306132	0.306132	0.306132	0.341583	0.341583	0.341583	0.341583	0.341583	0.341583	0.286725	0.286725	0.286725	0.286725	0.286725	0.286725
	QQR	QR
0.05	0.495668	-0.0572066
0.1	0.34663	-0.112715
0.15	-2.08097	-0.168329
0.2	-4.71986	-0.25893
0.25	-0.388133	-0.338328
0.3	5.11653	-0.42596
0.35	2.67491	-0.799371
0.4	-0.0711084	-0.691502
0.45	0.0315168	-0.121398
0.5	0.434626	0.377776
0.55	0.47611	0.902325
0.6	1.02865	0.971751
0.65	0.750208	1.16975
0.7	-4.36333	1.05248
0.75	-3.73133	0.955401
0.8	1.8733	0.892389
0.85	13.7235	0.699954
0.9	3.9072	0.404513
0.95	0.317762	0.095867
