# Supplementary material for: Macroeconomic Imbalances and Financial Stress Among BRICS: Analysis of Frequency-Dependent and Asymmetric Causal Nexuses
Source: publisher site journal article supplement (doi:10.1515/snde-2024-0045), 2025-04-16
Supplement: Supplementary file 55 [file Residual.xlsx]

## Sheet: CA
-0.281275	-0.281275	-0.26191	-0.26191	-0.282029	-0.282029	-0.262873	-0.262873	-0.283529	-0.283529	-0.264444	-0.285748	-0.285748	-0.266607	-0.288668	-0.269375	-0.269375	-0.272742	-0.272742
-0.164842	-0.164842	-0.164842	-0.163648	-0.163648	-0.163648	-0.163648	-0.163648	-0.164985	-0.164985	-0.163845	-0.163845	-0.163845	-0.165265	-0.165265	-0.164186	-0.165696	-0.167467	-0.168181
-0.161768	-0.161084	-0.161084	-0.161084	-0.160607	-0.160607	-0.160607	-0.160607	-0.160607	-0.160607	-0.160354	-0.160354	-0.160354	-0.160354	-0.160354	-0.160354	-0.160354	-0.160354	-0.160354
-0.17446	-0.17446	-0.176186	-0.174134	-0.174134	-0.174134	-0.174134	-0.175964	-0.175964	-0.175964	-0.175964	-0.175964	-0.17396	-0.17396	-0.17396	-0.17396	-0.17396	-0.17396	-0.17396
-0.19298	-0.19157	-0.19157	-0.193304	-0.193304	-0.193304	-0.191784	-0.191784	-0.191784	-0.191784	-0.191784	-0.193483	-0.193483	-0.193483	-0.193483	-0.193483	-0.193483	-0.193483	-0.193483
-0.200375	-0.200635	-0.200635	-0.200635	-0.200635	-0.200635	-0.200635	-0.200303	-0.200753	-0.200753	-0.200753	-0.200753	-0.200753	-0.200753	-0.200753	-0.200753	-0.200753	-0.200753	-0.200753
-0.200945	-0.200945	-0.200945	-0.200945	-0.200945	-0.200945	-0.200945	-0.200945	-0.200945	-0.200945	-0.200945	-0.201172	-0.201172	-0.200834	-0.200834	-0.200834	-0.200834	-0.200834	-0.200636
-0.197049	-0.197049	-0.197049	-0.197049	-0.197049	-0.197049	-0.197049	-0.197049	-0.197049	-0.197605	-0.197605	-0.197605	-0.197605	-0.197605	-0.197605	-0.19701	-0.19701	-0.197554	-0.197554
-0.192586	-0.192586	-0.192586	-0.192586	-0.192586	-0.192586	-0.192586	-0.191555	-0.191555	-0.191555	-0.191555	-0.191555	-0.191555	-0.191555	-0.191555	-0.191555	-0.192484	-0.191403	-0.191403
-0.182531	-0.182531	-0.182531	-0.182531	-0.182531	-0.182531	-0.182531	-0.182531	-0.182531	-0.182531	-0.182531	-0.180864	-0.180864	-0.180864	-0.182415	-0.182415	-0.182415	-0.182415	-0.180691
-0.167244	-0.167244	-0.167244	-0.167244	-0.167244	-0.167244	-0.167244	-0.167244	-0.167244	-0.167244	-0.169373	-0.169373	-0.169373	-0.169373	-0.167213	-0.167213	-0.167213	-0.167213	-0.169295
-0.150214	-0.150214	-0.150214	-0.150214	-0.150214	-0.150214	-0.150214	-0.152255	-0.152255	-0.152255	-0.152255	-0.152255	-0.152255	-0.152255	-0.152255	-0.152255	-0.150287	-0.152361	-0.152361
-0.139001	-0.139001	-0.139001	-0.139001	-0.139001	-0.139001	-0.139001	-0.139001	-0.137295	-0.137295	-0.137295	-0.137295	-0.137295	-0.137295	-0.137295	-0.139071	-0.139071	-0.1374	-0.1374
-0.126113	-0.126113	-0.126113	-0.126113	-0.126113	-0.126113	-0.126113	-0.126113	-0.126113	-0.124652	-0.124652	-0.124652	-0.124652	-0.124652	-0.126167	-0.126167	-0.126167	-0.124726	-0.124726
-0.114534	-0.114534	-0.114534	-0.114534	-0.114534	-0.114534	-0.114534	-0.113081	-0.113081	-0.113081	-0.113081	-0.113081	-0.113081	-0.113081	-0.114553	-0.114553	-0.113111	-0.113111	-0.113111
-0.099312	-0.099312	-0.099312	-0.099312	-0.099312	-0.099312	-0.099312	-0.099312	-0.100918	-0.100918	-0.100918	-0.0993482	-0.0993482	-0.0993482	-0.0993482	-0.0993482	-0.100963	-0.0994251	-0.0994251
-0.0837457	-0.0837457	-0.0837457	-0.0837457	-0.0837457	-0.0837457	-0.0837457	-0.0837457	-0.0852392	-0.0852392	-0.0838482	-0.0838482	-0.0838482	-0.0838482	-0.0838482	-0.0853899	-0.0840578	-0.0840578	-0.0843786
-0.0695871	-0.0695871	-0.0695871	-0.0695871	-0.0695871	-0.0695871	-0.0686447	-0.0686447	-0.0696206	-0.0696206	-0.0696206	-0.0696206	-0.0686681	-0.0686681	-0.0697274	-0.0687562	-0.0687562	-0.0699094	-0.0689142
-0.0464277	-0.0464277	-0.0464277	-0.0464277	-0.0464277	-0.0464277	-0.0463842	-0.0463842	-0.0463842	-0.0463842	-0.0463842	-0.0492525	-0.0492525	-0.0463492	-0.0463492	-0.0491845	-0.0491845	-0.0491845	-0.0517029
	QQR	QR
0.05	-0.274667	-0.185224
0.1	-0.164754	-0.184546
0.15	-0.160623	-0.183487
0.2	-0.174694	-0.18143
0.25	-0.19278	-0.179603
0.3	-0.200673	-0.177053
0.35	-0.200923	-0.174792
0.4	-0.197274	-0.172801
0.45	-0.191968	-0.169801
0.5	-0.182147	-0.167805
0.55	-0.167794	-0.165426
0.6	-0.151411	-0.162809
0.65	-0.138211	-0.160877
0.7	-0.125591	-0.159012
0.75	-0.113776	-0.157538
0.8	-0.0996739	-0.156284
0.85	-0.0840826	-0.154936
0.9	-0.0692997	-0.154396
0.95	-0.0474183	-0.154643

## Sheet: CGD
0.28072	0.286162	0.286162	0.287619	0.287619	0.290222	0.290222	0.293998	0.302396	0.302396	0.30813	0.318232	0.326006	0.337785	0.34773	0.375436	0.403978	0.532105	3.27359
0.304112	0.297844	0.305425	0.299602	0.30788	0.3025	0.311466	0.306547	0.316205	0.322126	0.333444	0.341296	0.354241	0.364116	0.378596	0.422882	0.511927	2.92432	3.37861
0.319973	0.312139	0.321258	0.323817	0.323817	0.327549	0.327549	0.332427	0.344398	0.351062	0.364611	0.373093	0.382828	0.41464	0.444067	0.556565	2.6888	3.18076	3.42514
0.350091	0.350091	0.35189	0.35189	0.35491	0.359174	0.359174	0.364632	0.378967	0.38613	0.401876	0.427551	0.455792	0.506136	0.661985	2.59278	3.09154	3.35432	3.46686
0.386433	0.387549	0.402379	0.389798	0.405134	0.409011	0.41403	0.431201	0.437669	0.445201	0.482867	0.511956	0.586959	1.01129	2.64106	3.00666	3.22041	3.40576	3.50326
0.464993	0.448208	0.46644	0.468836	0.472131	0.491878	0.496224	0.501466	0.528528	0.572184	0.626321	0.739126	1.78702	2.69602	2.99665	3.21145	3.34026	3.45055	3.53219
0.544028	0.544977	0.567422	0.569083	0.571413	0.574463	0.621748	0.62557	0.680499	0.74035	0.970567	2.02026	2.62026	2.9253	3.14666	3.2812	3.40152	3.49885	3.53219
0.636936	0.637332	0.662698	0.689614	0.690784	0.719259	0.749308	0.781361	0.878311	1.19174	2.00181	2.54899	2.95068	3.18217	3.31836	3.34949	3.40152	3.49885	3.53219
0.770765	0.770958	0.771253	0.800874	0.801648	0.864646	0.899379	1.00764	1.26751	1.84506	2.39372	2.81402	2.95068	3.18217	3.31836	3.34949	3.40152	3.49885	3.53219
0.892962	0.892858	0.925754	0.960377	0.99684	1.03493	1.157	1.30382	1.63893	2.14485	2.57327	2.81402	2.95068	3.00333	3.14666	3.21081	3.29926	3.37861	3.50326
1.03029	1.06814	1.06871	1.07012	1.11046	1.19567	1.29459	1.51155	1.83466	2.22717	2.47786	2.71297	2.69602	2.75609	-1.44391	-1.44999	-1.47357	-1.49827	-1.55688
1.18804	1.14728	1.19045	1.23507	1.28309	1.38525	1.44685	1.63062	1.90591	2.14485	2.31203	2.23642	-1.58025	-1.56046	-1.54867	-1.53494	-1.54012	-1.53467	-1.55904
1.27704	1.32507	1.32624	1.37626	1.37968	1.4916	1.61967	1.75642	1.90591	1.9948	1.8535	-1.79201	-1.7115	-1.68403	-1.63135	-1.62104	-1.58688	-1.59648	-1.59613
1.47843	1.47785	1.42551	1.53667	1.54277	1.55037	1.68366	1.75642	1.83466	1.59953	-2.07115	-1.95293	-1.85383	-1.77402	-1.71629	-1.67267	-1.64433	-1.62277	-1.59749
1.59107	1.59013	1.65109	1.6559	1.6636	1.67211	1.74702	1.75642	1.71261	-2.37114	-2.21617	-2.08839	-1.97586	-1.89175	-1.80624	-1.80009	-1.75902	-1.70691	-1.69124
1.71204	1.71229	1.78051	1.78732	1.79648	1.8057	1.81359	1.75642	-2.76076	-2.55531	-2.38001	-2.24092	-2.12841	-2.03573	-1.96066	-1.90215	-1.91052	-1.84382	-1.82421
1.84297	1.84609	1.9236	1.93291	1.8655	1.95292	1.88703	1.75642	-2.76076	-2.55905	-2.39154	-2.34266	-2.25632	-2.16394	-2.08759	-2.05538	-2.00335	-1.9684	-1.95737
1.98713	1.99398	2.08281	2.00895	2.01989	2.03005	1.96077	1.75642	-2.87911	-2.66955	-2.50227	-2.39589	-2.37389	-2.27833	-2.19876	-2.20921	-2.15721	-2.13809	-2.11429
2.1492	2.1593	2.16594	2.1796	2.19184	2.11135	2.03841	1.75642	-2.88239	-2.68704	-2.62852	-2.52364	-2.41196	-2.40659	-2.32418	-2.34077	-2.2867	-2.32961	-2.24169
	QQR	QR
0.05	0.480553	1.06769
0.1	0.635955	1.06937
0.15	0.795499	1.07096
0.2	0.977147	1.11305
0.25	1.18309	1.16026
0.3	1.43634	1.21448
0.35	1.65454	1.22829
0.4	1.86428	1.29327
0.45	2.01267	1.36555
0.5	2.09622	1.44818
0.55	0.875351	1.575
0.6	0.434089	1.74138
0.65	0.215094	1.89193
0.7	-0.00103223	2.10974
0.75	-0.224572	2.33705
0.8	-0.493586	2.57742
0.85	-0.502049	-1.46805
0.9	-0.530347	-1.47357
0.95	-0.542685	-1.52633

## Sheet: OGAP
-18.9852	-18.509	-18.0759	-17.6702	-17.2878	-16.959	-16.7123	-16.6273	-16.5647	-16.4687	-16.4383	-16.5391	-16.5995	-16.7421	-16.9357	-17.0294	-17.0085	-17.0421	-17.0608
-18.9852	-18.509	-18.0759	-17.6702	-17.2878	-16.959	-16.7123	-16.6273	-16.5647	-16.4687	-16.4383	-16.5391	-16.5995	-16.7421	-16.9357	-17.0294	-17.0085	-17.0421	-17.148
-18.9852	-18.509	-18.0759	-17.6702	-17.2996	-16.959	-16.7123	-16.7158	-16.5647	-16.4687	-16.5221	-16.5391	-16.5995	-16.878	-16.9357	-17.0294	-17.0085	-17.1398	-17.148
-18.9852	-18.509	-18.0759	-17.6702	-17.2996	-17.0212	-16.913	-16.7158	-16.5647	-16.4687	-16.5221	-16.5391	-16.5995	-16.878	-16.9357	-17.0294	-17.0917	-17.1398	-17.148
-18.9852	-18.509	-18.0759	-17.6702	-17.2996	-17.0212	-16.913	-16.7158	-16.5647	-16.4687	-16.5221	-16.5391	-16.6667	-16.878	-17.0058	-17.0294	-17.1952	-17.1398	-17.148
-18.9852	-18.509	-18.0759	-17.6702	-17.2996	-17.0212	-16.913	-16.7158	-16.5647	-16.4687	-16.5221	-16.5391	-16.8029	-16.878	-17.0058	-17.0294	-17.1952	-17.1398	-17.148
-18.9852	-18.509	-18.0759	-17.6702	-17.2996	-17.0212	-16.913	-16.7158	-16.5647	-16.5686	-16.5221	-16.5391	-16.8029	-16.878	-17.0058	-17.0294	-17.1952	-17.1398	-17.148
-18.9852	-18.509	-18.0759	-17.6702	-17.2996	-17.1522	-16.913	-16.7158	-16.5647	-16.5686	-16.5221	-16.5391	-16.8029	-16.878	-17.0058	-17.142	-17.1952	-17.226	-17.148
-18.9852	-18.509	-18.0759	-17.6702	-17.2996	-17.1522	-16.913	-16.7158	-16.5647	-16.5686	-16.5221	-16.6719	-16.8029	-16.878	-17.0058	-17.142	-17.1952	-17.226	-17.2356
-18.9852	-18.509	-18.0759	-17.6702	-17.2996	-17.1522	-16.913	-16.7158	-16.5647	-16.5686	-16.5221	-16.7469	-16.8029	-16.9424	-17.0058	-17.2162	-17.1952	-17.226	-17.2356
-18.9852	-18.509	-18.0759	-17.6702	-17.2996	-17.1522	-16.913	-16.7158	-16.5647	-16.5686	-16.5221	-16.7469	-16.8029	-16.9424	-17.1282	-17.2162	-17.1952	-17.226	-17.3251
-18.9852	-18.509	-18.0759	-17.6702	-17.4368	-17.1522	-16.913	-16.7158	-16.6774	-16.5686	-16.648	-16.7469	-16.8029	-16.9424	-17.1282	-17.2162	-17.1952	-17.3198	-17.3251
-18.9852	-18.509	-18.0759	-17.6702	-17.4368	-17.1522	-16.913	-16.7158	-16.6774	-16.5686	-16.648	-16.7469	-16.8029	-16.9424	-17.1282	-17.2162	-17.1952	-17.3198	-17.3251
-18.9852	-18.509	-18.0759	-17.6702	-17.4368	-17.1522	-16.913	-16.7158	-16.6774	-16.5686	-16.648	-16.7469	-16.8029	-17.0728	-17.1282	-17.2162	-17.2746	-17.3198	-17.3251
-18.9852	-18.509	-18.0759	-17.6702	-17.4368	-17.1522	-16.913	-16.7158	-16.6774	-16.6858	-16.648	-16.7469	-16.8029	-17.0728	-17.1934	-17.2162	-17.3736	-17.3198	-17.3251
-18.9852	-18.509	-18.0759	-17.8165	-17.4368	-17.1522	-16.913	-16.7158	-16.6774	-16.6858	-16.738	-16.7469	-16.8708	-17.0728	-17.1934	-17.2162	-17.3736	-17.3198	-17.3251
-18.9852	-18.509	-18.0759	-17.8165	-17.4368	-17.1522	-16.913	-16.7158	-16.6774	-16.6858	-16.738	-16.7469	-17.0052	-17.0728	-17.1934	-17.2162	-17.3736	-17.3198	-17.3251
-18.9852	-18.509	-18.0759	-17.8165	-17.4368	-17.1522	-16.913	-16.8376	-16.7853	-16.6858	-16.738	-16.7469	-17.0052	-17.0728	-17.1934	-17.322	-17.3736	-17.4036	-17.3251
-18.9852	-18.509	-18.0759	-17.8165	-17.4368	-17.1522	-16.913	-16.8376	-16.7853	-16.6858	-16.738	-16.7469	-17.0052	-17.0728	-17.1934	-17.322	-17.3736	-17.4036	-17.4139
	QQR	QR
0.05	-17.1187	-18.9852
0.1	-17.1233	-18.509
0.15	-17.1453	-18.0759
0.2	-17.1635	-17.6702
0.25	-17.1762	-17.4368
0.3	-17.1834	-17.1522
0.35	-17.1886	-16.913
0.4	-17.206	-16.7158
0.45	-17.2176	-16.6774
0.5	-17.2288	-16.5686
0.55	-17.24	-16.5221
0.6	-17.2647	-16.6143
0.65	-17.2647	-16.8029
0.7	-17.2757	-16.9424
0.75	-17.2905	-17.0058
0.8	-17.3065	-17.2162
0.85	-17.3136	-17.1952
0.9	-17.3357	-17.226
0.95	-17.3403	-17.2356
