# Supplementary material for: Macroeconomic Imbalances and Financial Stress Among BRICS: Analysis of Frequency-Dependent and Asymmetric Causal Nexuses
Source: publisher site journal article supplement (doi:10.1515/snde-2024-0045), 2025-04-16
Supplement: Supplementary file 56 [file Signal.xlsx]

## Sheet: CA
	QQR	QR
0.05	#DIV/0!
0.1	#DIV/0!
0.15	#DIV/0!
0.2	#DIV/0!
0.25	#DIV/0!
0.3	#DIV/0!
0.35	#DIV/0!
0.4	#DIV/0!
0.45	#DIV/0!
0.5	#DIV/0!
0.55	#DIV/0!
0.6	#DIV/0!
0.65	#DIV/0!
0.7	#DIV/0!
0.75	#DIV/0!
0.8	#DIV/0!
0.85	#DIV/0!
0.9	#DIV/0!
0.95	#DIV/0!

## Sheet: CGD
8.15059	8.15059	14.8125	14.8125	14.8125	2.85343	-0.849243	-0.849243	1.0021	8.06153	8.06153	8.06153	8.06153	8.06153	15.4171	15.4171	15.4171	15.4171	15.4171
8.15059	8.15059	8.15059	14.8125	14.8125	2.85343	-0.849243	-0.849243	1.0021	1.0021	8.06153	8.06153	8.06153	8.06153	15.4171	15.4171	15.4171	15.4171	15.4171
8.15059	8.15059	8.15059	8.15059	2.85343	2.85343	-0.849243	-0.849243	1.0021	1.0021	1.0021	-0.816744	-0.816744	-0.816744	-0.816744	15.4171	15.4171	15.4171	15.4171
4.85308	8.15059	8.15059	2.85343	2.85343	2.85343	0.893518	0.312597	1.0021	1.0021	-0.816744	-0.816744	-0.816744	-0.816744	-0.816744	-3.57901	-3.57901	-3.57901	-3.57901
4.85308	4.85308	0.893518	0.893518	0.893518	0.893518	0.893518	0.312597	1.0021	1.0021	-0.816744	-0.816744	-0.816744	-0.816744	-1.0664	-3.57901	-3.57901	-3.57901	-3.57901
2.86268	0.893518	0.893518	0.893518	0.893518	0.893518	0.893518	0.312597	-0.913126	-0.816744	-0.816744	-0.816744	-0.816744	-1.0664	-1.0664	-1.0664	-3.57901	-3.57901	-3.57901
-1.58252	-1.15026	-0.30457	-0.30457	0.893518	-0.913126	-0.913126	-1.0664	-1.0664	-1.0664	-1.0664	-1.0664	-1.0664	-1.0664	-1.0664	-1.0664	-2.70075	-3.57901	-3.31959
-9.11775	-5.03942	-3.67875	-3.34981	-3.1611	-2.87275	-2.87275	-1.99977	-1.88357	-1.88357	-1.88357	-1.77424	-1.0664	-2.20357	-2.20357	-2.20357	-2.5424	-2.5424	-3.31959
-12.2168	-14.4987	-11.6398	-8.06895	-7.80618	-5.91144	-5.22957	-4.53454	-4.53604	-4.26308	-4.2367	-4.2367	-3.83381	-3.61314	-2.70075	-2.70075	-2.70075	-2.5424	-2.20357
-17.3417	-15.8706	-14.5308	-12.4256	-14.971	-11.4439	-11.2648	-9.246	-8.1773	-7.42621	-7.38127	-5.38659	-4.36692	-4.26308	-4.2367	-4.7923	-2.70075	-2.70075	-2.20357
-18.4194	-24.1304	-21.6434	-20.6355	-17.1547	-15.2269	-11.4439	-11.4227	-16.5124	-13.967	-13.1995	-12.3881	-11.2518	-9.32319	-8.21677	-6.38054	-5.99733	-3.31959	-2.20357
-27.9317	-24.1304	-22.0298	-20.7212	-17.9389	-25.24	-23.5413	-20.1262	-17.7221	-16.5469	-14.4548	-15.0127	-14.0514	-11.5434	-9.41082	-7.70654	-5.99733	-4.16869	-2.20357
-20.1978	-24.1304	-22.0298	-20.7212	-17.9389	-26.2874	-24.4727	-20.1262	-17.7221	-16.6921	-15.2226	-14.0474	-13.8603	-11.6449	-9.41082	-6.52029	-4.7923	-2.70075	-0.994888
-19.4372	-18.4416	-8.02761	7.62804	3.88181	-12.0779	-23.5413	-13.1132	-12.0146	-16.5124	-13.7923	-12.9681	-11.4982	-10.1362	-7.85217	-4.70971	-3.03527	-0.2976	1.11082
-12.6203	9.53888	17.2383	14.775	15.3468	13.7358	9.71504	0.994959	-5.82817	-4.3282	-1.82612	-3.55387	-4.25778	-2.06508	0.885412	-0.61672	1.36756	1.34869	7.60993
6.9779	14.8568	19.2183	17.2714	17.0485	15.585	14.9422	11.6753	9.85676	5.11423	4.2114	5.1475	6.01308	5.70519	5.60611	5.33329	3.63044	4.72978	8.03247
6.9779	14.8568	19.4506	18.3959	17.0485	18.8515	16.6142	14.6521	11.393	12.5265	9.11813	10.6004	9.77583	8.43864	7.13262	6.29042	4.16804	4.72978	10.7955
6.9779	23.9813	19.4506	18.3959	17.7575	20.0264	16.6142	14.6521	11.393	15.1161	13.3004	11.5174	11.7585	11.4715	8.81832	7.52129	4.62679	4.72978	10.7955
7.3723	23.9813	21.1875	18.3959	17.9391	20.0264	16.9369	14.6521	11.393	15.1161	13.3004	11.5174	11.7585	11.4715	8.81832	7.52129	3.63044	2.30235	8.93938
	QQR	QR
0.05	9.48888	-9.44808
0.1	8.7667	-7.35221
0.15	5.15886	-6.34075
0.2	0.764478	-5.18422
0.25	-0.113626	-4.36979
0.3	-0.504208	-3.32675
0.35	-1.23535	-4.95259
0.4	-2.92624	-4.38989
0.45	-5.6565	-4.13494
0.5	-8.45946	-4.13981
0.55	-12.7809	-3.47163
0.6	-15.8146	-3.17535
0.65	-15.2375	-3.23893
0.7	-9.20182	-2.39323
0.75	3.02421	-2.28214
0.8	9.52398	-2.38102
0.85	11.6745	-1.74641
0.9	13.1002	-0.999049
0.95	12.9611	-1.40739

## Sheet: OGAP
0	0	0	0	0	0	0	0	0	0	0	0	0	0	0	0	0	0	0
0	0	0	0	0	0	0	0	0	0	0	0	0	0	0	0	0	0	0
7.94906	7.94906	7.94906	7.94906	7.94906	7.94906	7.94906	7.94906	7.94906	7.94906	7.94906	7.94906	7.94906	7.94906	7.94906	7.94906	7.94906	7.94906	7.94906
-4.75478	-4.75478	-4.75478	-4.75478	-4.75478	-4.75478	-4.75478	-4.75478	-4.75478	-4.75478	-4.75478	-4.75478	-4.75478	-4.75478	-4.75478	-4.75478	-4.75478	-4.75478	-1.3134
-3.00727	-3.00727	-3.00727	-3.00727	-3.00727	-3.00727	-3.00727	-2.03029	-2.03029	-2.03029	-2.03029	-2.03029	-2.03029	-2.03029	-2.03029	-2.03029	-2.03029	-2.03029	-2.03029
-4.27885	-2.54935	-2.54935	-2.54935	-2.54935	-2.54935	-2.54935	34.8874	34.8874	34.8874	34.8874	34.8874	34.8874	34.8874	34.8874	34.8874	34.8874	34.8874	34.8874
-59.4363	-59.4363	-59.4363	-59.4363	-59.4363	-59.4363	-59.4363	-59.4363	-59.4363	-59.4363	-59.4363	-59.4363	-12.6286	-12.6286	-12.6286	-12.6286	-12.6286	-12.6286	-12.6286
4.99125	4.99125	4.99125	4.99125	4.99125	1.33609	1.33609	-7.13056	-7.13056	3.30752	3.30752	-4.22607	-4.22607	-4.22607	-4.22607	-4.22607	-4.22607	-4.22607	-4.22607
5.76278	5.76278	5.76278	5.76278	5.76278	5.76278	5.76278	5.76278	5.76278	5.76278	5.76278	5.76278	5.76278	5.76278	5.76278	5.76278	5.76278	5.76278	5.76278
47.3084	47.3084	47.3084	47.3084	47.3084	47.3084	47.3084	47.3084	47.3084	47.3084	47.3084	47.3084	47.3084	47.3084	47.3084	47.3084	47.3084	47.3084	3.67398
4.70833	2.46602	2.46602	2.46602	2.46602	-14.8677	-14.8677	-14.8677	-14.8677	-14.8677	-20.1322	-20.1322	-20.1322	-20.1322	-5.40271	-5.40271	-5.40271	-5.40271	-5.40271
-12.801	-12.801	-12.801	-12.801	-12.801	-12.801	-12.801	-12.801	-12.801	-12.801	-12.801	-12.801	-12.801	-12.801	-12.801	-12.801	-12.801	-12.801	-12.801
16.5824	16.5824	16.5824	16.5824	16.5824	16.5824	16.5824	16.5824	16.5824	16.5824	16.5824	16.5824	16.5824	16.5824	16.5824	16.5824	16.5824	16.5824	16.5824
0.479342	0.479342	0.479342	0.479342	0.479342	0.479342	0.479342	0.479342	0.479342	0.479342	0.479342	0.479342	0.479342	0.479342	0.479342	0.479342	0.479342	0.479342	0.479342
0.479342	0.479342	0.479342	0.479342	0.479342	0.479342	0.479342	0.479342	0.479342	0.479342	0.479342	0.479342	0.479342	0.479342	0.479342	0.479342	0.479342	0.479342	0.479342
-3.21316	-3.21316	-3.21316	-3.21316	-3.21316	-3.21316	-3.21316	-3.21316	-3.21316	-3.21316	-3.21316	-3.21316	-3.21316	-3.21316	-3.21316	-3.21316	-3.21316	-3.21316	-3.21316
-3.21316	-3.21316	-3.21316	-3.21316	-3.21316	-3.21316	-3.21316	-3.21316	-3.21316	-3.21316	-3.21316	-3.21316	-3.21316	-3.21316	-3.21316	-3.21316	-3.21316	-3.21316	-3.21316
0.409574	0.409574	0.409574	0.409574	0.409574	0.409574	0.409574	0.409574	0.409574	0.409574	0.409574	0.409574	0.409574	0.409574	0.409574	0.409574	0.409574	0.409574	0.409574
0	0	0	0	0	0	0	0	0	0	0	0	0	0	0	0	0	0	0
	QQR	QR
0.05	0	-0.298966
0.1	0	-0.338911
0.15	7.94906	-0.383327
0.2	-4.57366	-0.393892
0.25	-2.39023	-0.388029
0.3	21.0039	-0.459041
0.35	-42.1913	-0.577314
0.4	-0.727696	-0.544249
0.45	5.76278	-0.504477
0.5	45.0118	-0.542189
0.55	-8.8057	-0.484934
0.6	-12.801	-0.519991
0.65	16.5824	-0.49402
0.7	0.479342	-0.424309
0.75	0.479342	-0.273818
0.8	-3.21316	-0.0952686
0.85	-3.21316	-0.18937
0.9	0.409574	-0.151198
0.95	0	-0.102419
