# Supplementary material for: Macroeconomic Imbalances and Financial Stress Among BRICS: Analysis of Frequency-Dependent and Asymmetric Causal Nexuses
Source: publisher site journal article supplement (doi:10.1515/snde-2024-0045), 2025-04-16
Supplement: Supplementary file 57 [file IMF1.xlsx]

## Sheet: CA
-5.60803	-5.60803	-5.60803	-5.60803	-5.60803	-5.60803	-5.60803	-5.60803	-5.60803	-5.60803	-5.60803	-5.60803	-5.60803	-5.60803	-5.60803	-5.60803	-5.60803	-5.60803	-5.60803
0.809418	0.809418	0.809418	0.809418	0.809418	0.809418	0.809418	0.809418	0.809418	0.809418	0.809418	0.809418	0.809418	0.809418	0.809418	0.809418	0.809418	0.809418	0.809418
-5.47193	-5.47193	-5.47193	-5.47193	-5.47193	-5.47193	-5.47193	-1.54315	-1.54315	-1.54315	-1.54315	-1.54315	-1.54315	-1.54315	-1.54315	-1.54315	-1.54315	1.80399	1.80399
0.918649	0.918649	0.918649	6.2774	6.2774	6.2774	6.2774	6.2774	6.2774	6.2774	1.75778	1.75778	1.75778	1.75778	1.75778	1.75778	1.75778	1.75778	1.75778
0.277565	0.277565	0.277565	-3.58084	-3.58084	-3.58084	-1.92022	-1.92022	-1.92022	4.40666	4.40666	4.40666	4.40666	4.40666	4.40666	4.40666	4.40666	4.40666	4.40666
0.822971	0.822971	1.20558	1.20558	1.20558	1.35999	2.44154	2.44154	1.77018	1.87058	2.01937	2.01937	2.01937	2.01937	2.01937	1.97993	1.97993	1.97993	1.97993
-0.197382	1.48185	1.48185	1.12511	-0.89316	-0.89316	-0.89316	0.496033	0.496033	0.496033	0.607805	0.607805	0.607805	0.41449	0.41449	3.57092	5.74187	4.27665	3.25335
2.28066	2.6752	2.6752	2.6752	0.426064	1.16535	0.0335289	0.0335289	0.0335289	0.0335289	-0.0397906	-0.107986	0.316394	0.316394	0.316394	0.0594556	1.30246	1.30246	1.30246
-3.28062	-3.28062	-3.28062	-3.34091	-3.42669	-3.42669	-3.42669	-3.42669	-2.44766	-2.4401	-2.4401	-2.44321	-1.30044	-0.55706	-0.55706	-0.0557938	-0.0557938	-0.0557938	-0.0557938
1.20908	1.44568	1.44568	2.68379	1.87806	1.87806	1.72907	2.16995	2.16995	1.43087	1.43087	1.25858	-0.0287247	-0.0287247	-1.52982	-1.76115	1.35127	1.35127	1.35127
-1.55814	-2.46217	-2.38841	-2.38841	-3.63224	-3.63224	-4.33353	-4.33353	-4.6597	-4.05516	-4.05516	-4.29469	-3.47387	-3.05831	-2.44804	-3.14758	-3.14758	-2.79771	-0.713775
-2.29779	-3.3444	-4.19973	-3.49553	-3.49553	-3.49553	-3.34379	-1.54145	-1.1027	-1.1027	-1.1027	-1.19705	-1.8595	-4.69021	-0.765919	-1.08647	-1.08647	-2.43419	-2.78821
-4.50764	-4.50764	-4.50764	-4.50764	-4.52773	-4.52773	-4.52773	-4.52773	-4.53295	-4.53295	-4.53295	-4.53295	-0.312724	-0.435717	-0.435717	-0.435717	-0.435717	-0.435717	-3.53853
-0.0512746	-0.0512746	-0.0512746	-0.0512746	-0.0512746	-0.0512746	-0.0512746	-0.0512746	-0.0512746	-2.21376	4.26644	4.26644	4.26644	4.26644	4.26644	4.26644	4.26644	4.26644	4.26644
-2.76163	-2.76163	8.02574	8.02574	8.02574	8.02574	8.02574	8.02574	8.02574	8.02574	8.02574	8.02574	8.02574	8.02574	8.02574	8.02574	8.02574	8.02574	8.02574
5.95896	5.95896	5.95896	5.95896	5.95896	5.95896	5.95896	5.95896	5.95896	5.95896	5.95896	5.95896	5.95896	5.95896	5.95896	5.95896	5.95896	5.95896	5.95896
-2.94337	-2.94337	-8.60107	-8.60107	-8.60107	-8.60107	-8.60107	-8.60107	-8.60107	-8.60107	-8.60107	-8.60107	-8.60107	-8.60107	-8.60107	-8.60107	-2.11031	-2.11031	-2.11031
4.67366	4.67366	4.67366	4.67366	4.67366	4.67366	4.67366	4.67366	4.67366	4.67366	4.67366	4.67366	4.67366	4.67366	4.67366	4.67366	4.67366	4.67366	4.67366
-0.412895	-0.412895	-0.412895	-0.412895	-0.412895	-0.412895	-0.412895	-0.412895	-0.412895	-0.412895	-0.412895	-0.412895	-0.412895	-0.412895	-0.412895	-0.412895	-0.412895	-0.412895	-0.412895
	QQR	QR
0.05	-5.60803	0.0133003
0.1	0.809418	-0.0267336
0.15	-2.63826	-0.0106699
0.2	3.29041	-0.0416775
0.25	1.49453	0.00348389
0.3	1.74543	0.015788
0.35	1.16817	0.0234987
0.4	0.884212	-0.00979385
0.45	-2.06833	0.00360306
0.5	1.12816	0.0279823
0.55	-3.18843	0.0137878
0.6	-2.33841	0.028344
0.65	-3.17385	0.0198134
0.7	1.88015	0.0247097
0.75	6.89022	-0.0020591
0.8	5.95896	-0.00142664
0.85	-6.98067	0.0115273
0.9	4.67366	-0.0260841
0.95	-0.412895	0.0499852

## Sheet: CGD
48.1816	22.0705	55.3337	71.7388	67.5514	60.0239	47.3531	44.312	29.1218	32.7268	22.0511	8.68109	15.0833	15.2507	25.0395	4.83532	6.37702	33.3729	34.0122
48.1816	22.0705	55.3337	71.7388	67.5514	60.0239	47.3531	44.312	29.1218	32.7268	22.0511	8.68109	15.0833	15.2507	25.0395	4.83532	6.37702	33.3729	34.0122
48.1816	22.0705	55.3337	71.7388	67.5514	60.0239	49.9769	44.312	29.1218	32.7268	22.0511	8.68109	15.0833	15.2507	25.0395	4.83532	6.37702	33.3729	34.0122
48.1816	22.0705	55.3337	71.7388	67.5514	60.0239	49.9769	44.312	29.1218	32.7268	22.0511	8.68109	15.0833	15.2507	25.0395	4.83532	6.37702	33.3729	34.0122
48.1816	22.0705	55.3337	71.7388	67.5514	60.0239	49.9769	44.312	29.1218	32.7268	22.0511	8.68109	15.0833	15.2507	25.0395	4.83532	6.37702	33.3729	34.0122
48.1816	22.0705	55.3337	71.7388	67.5514	60.0239	49.9769	44.312	29.1218	32.7268	22.0511	8.68109	15.0833	15.2507	25.0395	4.83532	6.37702	33.3729	34.0122
48.1816	22.0705	55.3337	71.7388	67.5514	60.0239	49.9769	44.312	29.1218	32.7268	22.0511	8.68109	15.0833	15.2507	25.0395	4.83532	6.37702	33.3729	34.0122
48.1816	22.0705	55.3337	71.7388	67.5514	60.0239	49.9769	44.312	29.1218	32.7268	22.0511	8.68109	15.0833	15.2507	25.0395	4.83532	6.37702	33.3729	34.0122
48.1816	22.0705	55.3337	71.7388	67.5514	60.0239	49.9769	44.312	29.1218	32.7268	22.0511	8.68109	15.0833	15.2507	25.0395	4.83532	6.37702	33.3729	34.0122
48.1816	22.0705	55.3337	71.7388	67.5514	60.0239	49.9769	44.312	29.1218	32.7268	22.0511	8.68109	15.0833	15.2507	25.0395	4.83532	6.37702	33.3729	34.0122
48.1816	22.0705	55.3337	71.7388	67.5514	60.0239	49.9769	44.312	29.1218	32.7268	22.0511	8.68109	15.0833	15.2507	25.0395	4.83532	6.37702	33.3729	34.0122
48.1816	22.0705	55.3337	71.7388	67.5514	60.0239	49.9769	44.312	29.1218	32.7268	22.0511	8.68109	15.0833	15.2507	25.0395	4.83532	6.37702	33.3729	34.0122
48.1816	22.0705	55.3337	71.7388	67.5514	60.0239	49.9769	44.312	29.1218	32.7268	22.0511	8.68109	15.0833	15.2507	25.0395	4.83532	6.37702	33.3729	34.0122
48.1816	22.0705	55.3337	71.7388	67.5514	60.0239	49.9769	44.312	29.1218	32.7268	22.0511	8.68109	15.0833	15.2507	25.0395	7.10652	6.37702	33.3729	34.0122
48.1816	22.0705	55.3337	71.7388	67.5514	60.0239	49.9769	44.312	29.1218	32.7268	22.0511	8.68109	15.0833	15.2507	25.0395	7.10652	6.37702	33.3729	34.0122
48.1816	22.0705	55.3337	71.7388	67.5514	60.0239	49.9769	44.312	29.1218	32.7268	22.0511	8.68109	15.0833	15.2507	25.0395	7.10652	6.37702	33.3729	34.0122
48.1816	22.0705	55.3337	71.7388	67.5514	60.0239	49.9769	44.312	38.1929	32.7268	22.0511	8.68109	15.0833	15.2507	25.0395	7.10652	6.37702	33.3729	34.0122
48.1816	22.0705	55.3337	71.7388	67.5514	60.0239	49.9769	44.312	39.6288	32.7268	22.0511	8.68109	15.0833	15.2507	25.0395	8.30466	6.37702	33.3729	34.0122
48.1816	22.0705	55.3337	71.7388	67.5514	60.0239	49.9769	46.5273	39.6288	32.7268	22.0511	8.68109	19.0135	15.2507	25.0395	8.30466	6.37702	33.3729	34.0122
	QQR	QR
0.05	33.8482	48.1816
0.1	33.8482	22.0705
0.15	33.9863	55.3337
0.2	33.9863	71.7388
0.25	33.9863	67.5514
0.3	33.9863	60.0239
0.35	33.9863	49.9769
0.4	33.9863	44.312
0.45	33.9863	29.1218
0.5	33.9863	32.7268
0.55	33.9863	22.0511
0.6	33.9863	8.68109
0.65	33.9863	15.0833
0.7	34.1059	15.2507
0.75	34.1059	25.0395
0.8	34.1059	4.83532
0.85	34.5833	6.37702
0.9	34.7219	33.3729
0.95	35.0454	34.0122

## Sheet: OGAP
0	0	0	0	0	0	0	0	0	0	0	0	0	0	0	0	0	0	0
-0.583723	-0.583723	-0.583723	-0.583723	-0.583723	-0.583723	-0.583723	-0.583723	-0.583723	-0.583723	-0.583723	-0.583723	-0.583723	-0.583723	-0.583723	-0.583723	-0.583723	-0.583723	-0.583723
5.69655	5.69655	5.69655	5.69655	5.69655	5.69655	5.69655	5.69655	5.69655	5.69655	5.69655	8.83927	8.83927	8.83927	8.83927	8.83927	8.83927	8.83927	8.83927
1.09819	1.09819	1.09819	1.09819	2.6482	5.69655	5.69655	5.69655	5.69655	5.69655	5.69655	5.69655	8.83927	8.83927	8.83927	8.83927	8.83927	8.83927	8.83927
-1.32644	-1.32644	-1.32644	-1.32644	-1.32644	-1.32644	-1.32644	-1.32644	-1.53234	0.607537	0.169388	-1.11365	-1.11365	-1.11365	-1.11365	-1.11365	-1.11365	-1.11365	-0.317118
-2.76765	-2.76765	-2.76765	-2.76765	-2.76765	1.84288	7.53796	7.53796	7.53796	7.53796	7.53796	7.53796	1.59271	2.59581	1.38578	1.38578	1.38578	1.38578	1.38578
0.709453	4.77837	4.77837	4.77837	4.77837	11.6151	11.6151	11.6151	11.6151	11.6151	11.6151	1.84288	0.803729	0.803729	0.803729	0.803729	0.803729	0.0426958	-0.697495
0.630494	0.630494	0.709453	2.94499	2.94499	-0.647635	-0.647635	-0.647635	-0.647635	-0.647635	-0.647635	0.803729	2.4628	2.4628	2.4628	2.4628	2.4628	2.54649	1.68706
0.630494	0.630494	-3.04474	-3.04474	-3.04474	-10.1112	-7.80705	-7.80705	-7.80705	-7.80705	-7.80705	-7.80705	-7.80705	-4.15144	-5.23107	-5.23107	-5.23107	-5.23107	-5.23107
1.25169	1.25169	1.25169	1.25169	-0.581933	-0.581933	-0.581933	-0.650239	-0.650239	-0.650239	-0.650239	-0.650239	-0.650239	-0.650239	-0.650239	-0.650239	-0.480492	0.582449	0.309658
1.87946	1.87946	1.87946	1.87946	1.87946	1.87946	1.87946	1.87946	2.14127	2.14127	2.14127	4.06088	4.06088	4.06088	4.06088	4.06088	4.06088	4.06088	1.64078
-1.63645	-1.63645	-2.50615	-2.50615	-4.07423	-4.07423	-4.07423	-4.07423	-4.07423	-4.07423	-4.07423	-4.07423	-4.07423	-4.07423	-2.2851	-2.2851	-2.2851	-2.2851	-2.2851
-1.22361	-1.22361	-1.22361	-1.22361	-1.22361	-0.717264	-0.717264	0.543109	3.03255	3.03255	3.03255	3.03255	2.80541	2.80541	2.80541	2.80541	2.80541	2.80541	2.80541
0.367652	0.367652	0.367652	0.367652	0.367652	0.367652	0.367652	0.367652	-0.717264	-0.765727	-0.765727	-0.765727	-0.765727	-8.21251	-8.21251	-8.21251	-8.21251	-1.09818	-1.09818
-0.247874	-0.533951	-2.53753	-2.56135	-2.56135	-2.56135	-2.56135	-2.55118	-2.55118	-2.55118	0.457198	0.457198	0.671508	1.7781	1.7781	1.96866	1.96866	1.85319	1.04161
8.44033	8.44033	8.44033	8.44033	8.44033	3.89386	3.89386	3.89386	3.89386	3.89386	3.89386	4.76697	4.76697	3.02014	3.02014	3.02014	3.02014	3.02014	3.02014
-0.811058	-0.811058	-3.49104	-3.49104	-3.49104	-3.49104	-0.839814	-0.839814	-0.839814	-1.67372	-1.67372	-1.67372	-1.67372	-1.67372	1.44468	1.44468	1.44468	1.44468	1.44468
-1.92878	-1.92878	18.1208	18.1208	18.1208	18.1208	18.1208	18.1208	18.1208	18.1208	15.4106	15.4106	15.4106	15.4106	15.4106	15.4106	15.4106	15.4106	15.4106
-1.92878	-4.88716	-4.88716	-4.88716	-4.88716	-10.2867	-10.2867	-10.2867	-10.2867	-10.2867	-10.2867	-10.2867	-10.2867	-10.2867	-10.2867	-10.2867	-10.2867	-10.2867	-10.2867
	QQR	QR
0.05	0	-0.127183
0.1	-0.583723	-0.209392
0.15	7.0198	-0.217585
0.2	5.72588	-0.228909
0.25	-1.02524	-0.254934
0.3	2.3342	-0.184996
0.35	4.98528	-0.156902
0.4	1.12242	-0.148251
0.45	-5.41793	-0.170553
0.5	-0.114715	-0.201137
0.55	2.71192	-0.159657
0.6	-3.18174	-0.109206
0.65	1.30308	-0.155841
0.7	-1.8887	-0.0427452
0.75	-0.486529	0.00182831
0.8	4.90629	0.0387533
0.85	-1.01321	-0.0129714
0.9	14.7266	-0.0269496
0.95	-8.71007	0.123405
