# Supplementary material for: Macroeconomic Imbalances and Financial Stress Among BRICS: Analysis of Frequency-Dependent and Asymmetric Causal Nexuses
Source: publisher site journal article supplement (doi:10.1515/snde-2024-0045), 2025-04-16
Supplement: Supplementary file 58 [file IMF2.xlsx]

## Sheet: CA
-2.29127	-2.29127	-2.29127	-2.29127	-2.29127	-2.29127	-2.29127	-2.29127	-2.29127	-2.29127	-2.29127	-2.29127	-2.29127	-2.29127	-2.29127	-2.29127	-2.29127	-2.29127	-2.29127
-2.29127	-2.29127	-2.29127	-2.29127	-2.29127	-2.29127	-2.29127	-2.29127	-2.29127	-2.29127	-2.29127	-2.29127	-2.29127	-2.29127	-2.29127	-2.29127	-2.29127	-2.29127	-2.29127
0.82485	0.82485	0.82485	0.82485	0.82485	0.82485	0.82485	0.82485	0.82485	0.82485	0.82485	0.82485	0.82485	0.82485	0.82485	0.82485	0.82485	0.82485	0.82485
-0.599746	-0.599746	-0.599746	-0.599746	-0.599746	-0.599746	-0.599746	-0.599746	-0.599746	-0.599746	-0.599746	0.48081	0.48081	0.48081	0.48081	0.48081	0.48081	0.48081	0.48081
-4.97583	-4.97583	-4.97583	-4.97583	-4.97583	-4.97583	-4.97583	-4.97583	-4.97583	-4.97583	-13.7441	-13.7441	-13.7441	-13.7441	-13.7441	-13.7441	-13.7441	-3.18222	-3.18222
-0.122739	0.346566	0.346566	-0.0169587	-0.0169587	-0.0169587	-0.0169587	-0.0169587	-0.0169587	-0.0169587	0.592095	0.592095	0.592095	0.592095	1.99394	2.63447	2.63447	1.20206	-0.0109175
2.21558	2.21558	2.21558	2.21558	2.21558	2.21558	0.907407	0.907407	0.907407	-1.54337	-1.54337	-1.54337	-1.54337	-2.60108	-2.60108	-2.60108	-2.60108	-2.60108	-2.60108
-1.40835	-1.40835	-1.40835	-1.40835	-1.40634	-1.40634	-1.40634	-1.40634	-1.05496	-0.834399	-0.824458	-0.824458	-1.66586	-1.66586	-1.66586	-1.66586	-1.56769	-1.56769	-0.411261
-0.248262	-0.248262	2.09875	2.09875	1.53945	1.53945	1.53945	1.57521	1.45004	1.20868	1.20868	1.43314	1.20403	1.20403	1.20403	1.1939	1.1939	1.07132	1.07132
-2.29695	-3.65647	-4.6156	-4.1387	-0.422245	-0.0247789	0.47699	-1.40392	-1.119	-1.09469	-1.09469	-0.480489	-0.480489	-0.511498	-0.0688205	-2.4653	-1.43786	-3.00645	-4.73672
0.627705	-0.956825	1.9421	-1.14431	0.925171	1.00723	1.03261	0.980434	0.28724	-0.470923	-0.282084	-0.282084	-0.0705221	-0.264714	-0.264714	-1.19936	-2.82356	-0.184753	3.51287
1.55866	0.186937	-0.249227	-0.249227	-0.249227	0.556318	0.556318	0.498476	0.498476	0.647412	0.647412	0.621982	0.921513	0.921513	0.424731	1.10718	1.10718	1.98839	1.81842
1.19628	1.19628	1.19628	0.279626	-0.577397	-0.577397	-0.0991578	-0.142637	-0.142637	0.485206	0.485206	0.485206	0.438397	0.358122	0.420208	0.438713	0.438713	-0.743076	-2.10435
-0.822121	-0.863177	-1.82484	-1.82484	0.177211	1.09418	1.09418	1.09418	0.95	-0.0291388	0.722949	0.841534	0.841534	0.841534	0.721861	1.86143	3.09386	2.59115	1.10074
1.98804	1.98804	1.98804	1.98804	1.98804	0.0230427	0.97358	-0.604324	-0.604324	-0.604324	-0.604324	-0.604324	-0.604324	-1.1469	-1.1469	-1.1469	-1.1469	-1.1469	-1.1469
-0.365547	-0.365547	-1.20429	-1.55111	-1.55111	-1.55111	-1.55111	-1.55111	-1.55111	-1.55111	-1.55111	-1.55111	-1.55111	-1.55111	-1.55111	-0.271717	-0.271717	-0.271717	-0.271717
-0.873382	-0.873382	-0.873382	-2.32035	-2.32035	-2.32035	-2.32035	-2.32035	-2.32035	-2.32035	-2.32035	-2.32035	-2.32035	-2.32035	-2.32035	-2.32035	-2.32035	-2.32035	-2.32035
1.76199	1.76199	1.76199	1.76199	1.76199	1.76199	2.32566	2.32566	2.32566	2.32566	2.32566	2.32566	2.32566	2.32566	2.32566	2.32566	2.32566	2.32566	2.32566
-5.93549	-5.93549	-5.93549	-5.93549	-5.93549	-5.93549	-5.93549	-5.93549	-5.93549	-5.93549	-5.93549	-5.93549	-5.93549	-5.93549	-5.93549	-5.93549	-5.93549	-5.93549	-5.93549
	QQR	QR
0.05	-2.29127	0.121619
0.1	-2.29127	-0.0475072
0.15	0.82485	-0.0758516
0.2	-0.144775	-0.011589
0.25	-8.01743	0.0219079
0.3	0.593374	-0.0137756
0.35	-0.303382	-0.0133681
0.4	-1.31616	0.0106366
0.45	1.2283	-0.0075773
0.5	-1.71461	-0.0458935
0.55	0.124817	-0.00068816
0.6	0.700696	-0.00365289
0.65	0.159557	-0.0177574
0.7	0.613803	-0.00967549
0.75	0.0226056	0.00811087
0.8	-1.13871	-0.0220961
0.85	-2.09188	-0.0610288
0.9	2.14766	-0.0521461
0.95	-5.93549	0.00379011

## Sheet: CGD
31.4263	22.3699	14.4927	8.31467	5.0662	6.94839	3.02163	11.5346	11.3659	7.6852	12.5309	12.5482	13.2802	8.83072	18.6425	19.4525	30.8749	23.0541	34.2294
31.4263	22.3699	14.4927	8.31467	5.0662	6.94839	3.02163	11.5346	11.3659	7.6852	9.79318	12.5482	13.2802	8.83072	18.6425	19.4525	30.8749	23.0541	34.2294
31.4263	22.3699	14.4927	8.31467	5.0662	6.94839	3.02163	11.5346	11.3659	7.6852	9.79318	12.5482	13.2802	8.83072	18.6425	19.4525	30.8749	23.0541	34.2294
31.4263	22.3699	14.4927	8.31467	5.0662	6.94839	3.02163	11.5346	11.3659	7.6852	9.79318	12.5482	13.2802	8.83072	18.6425	19.4525	30.8749	23.0541	34.2294
31.4263	22.3699	14.4927	8.31467	5.0662	6.94839	3.02163	11.5346	11.3659	7.6852	9.79318	12.5482	13.2802	8.83072	18.6425	19.4525	30.8749	23.0541	34.2294
31.4263	22.3699	14.4927	8.31467	5.0662	6.94839	3.02163	11.5346	11.3659	7.6852	9.79318	12.5482	13.2802	8.83072	18.6425	19.4525	30.8749	23.0541	34.2294
31.4263	22.3699	14.4927	8.31467	5.0662	6.94839	3.02163	11.5346	11.3659	7.6852	9.79318	12.5482	13.2802	8.83072	18.6425	19.4525	30.8749	23.0541	34.2294
31.4263	22.3699	14.4927	8.31467	5.0662	6.94839	3.02163	11.5346	11.3659	7.6852	9.79318	12.5482	13.2802	8.83072	18.6425	19.4525	30.8749	23.0541	34.2294
31.4263	22.3699	14.4927	8.31467	5.0662	6.94839	3.02163	11.5346	11.3659	7.6852	9.79318	12.5482	13.2802	8.83072	18.6425	19.4525	30.8749	23.0541	34.2294
31.4263	22.3699	14.4927	8.31467	5.0662	6.94839	3.02163	11.5346	11.3659	7.6852	9.79318	12.5482	13.2802	8.83072	18.6425	19.4525	30.8749	23.0541	34.2294
31.4263	22.3699	14.4927	8.31467	5.0662	6.70481	3.02163	11.5346	11.3659	7.6852	9.79318	12.5482	13.2802	8.83072	18.6425	19.4525	30.8749	23.0541	34.2294
31.4263	22.3699	14.4927	8.31467	5.0662	6.70481	3.02163	11.5346	11.3659	7.6852	9.79318	12.5482	13.2802	8.83072	18.6425	19.4525	30.8749	23.0541	34.2294
31.4263	22.3699	14.4927	8.31467	5.0662	6.70481	3.02163	11.5346	11.3659	7.6852	9.79318	12.5482	13.2802	8.83072	18.6425	19.4525	30.8749	23.0541	34.2294
31.4263	22.3699	14.4927	8.31467	5.0662	6.70481	3.02163	11.5346	11.3659	7.6852	9.79318	12.5482	13.2802	8.83072	18.6425	19.4525	30.8749	23.0541	34.2294
31.4263	22.3699	14.4927	8.31467	5.0662	6.70481	3.02163	11.5346	11.3659	7.6852	9.79318	12.5482	13.2802	8.83072	18.6425	19.4525	30.8749	23.0541	34.2294
31.4263	18.9315	14.4927	8.31467	5.0662	6.70481	3.02163	11.5346	11.3659	7.6852	9.79318	12.5482	13.2802	8.83072	18.6425	19.4525	30.8749	23.0541	34.2294
31.4263	18.9315	14.4927	8.31467	5.0662	6.70481	3.02163	11.5346	11.3659	7.6852	9.79318	12.5482	13.2802	8.83072	18.6425	19.4525	30.8749	23.0541	34.2294
31.4263	18.9315	14.4927	8.31467	5.0662	6.70481	3.02163	11.5346	11.3659	7.6852	9.79318	12.5482	13.2802	8.83072	18.6425	19.4525	30.8749	23.0541	34.2294
31.4263	18.9315	14.4927	8.31467	5.0662	6.70481	3.02163	11.5346	11.3659	7.6852	9.79318	12.5482	13.2802	8.83072	18.6425	19.4525	30.8749	23.0541	34.2294
	QQR	QR
0.05	15.5615	31.4263
0.1	15.4174	22.3699
0.15	15.4174	14.4927
0.2	15.4174	8.31467
0.25	15.4174	5.0662
0.3	15.4174	6.70481
0.35	15.4174	3.02163
0.4	15.4174	11.5346
0.45	15.4174	11.3659
0.5	15.4174	7.6852
0.55	15.4046	9.79318
0.6	15.4046	12.5482
0.65	15.4046	13.2802
0.7	15.4046	8.83072
0.75	15.4046	18.6425
0.8	15.2236	19.4525
0.85	15.2236	30.8749
0.9	15.2236	23.0541
0.95	15.2236	34.2294

## Sheet: OGAP
0	0	0	0	0	0	0	0	0	0	0	0	0	0	0	0	0	0	0
0.560048	0.560048	0.560048	0.560048	0.560048	0.560048	0.560048	0.560048	0.560048	0.560048	0.560048	0.560048	0.560048	0.560048	0.560048	0.560048	0.560048	0.560048	0.560048
-6.54841	-6.54841	-6.54841	-6.54841	-6.54841	-6.54841	-6.54841	-6.54841	-6.54841	-6.54841	-6.54841	-6.54841	-6.54841	-6.54841	-6.54841	-6.54841	-6.54841	-6.54841	-6.54841
-6.54841	-6.54841	-6.54841	-6.54841	-6.54841	-6.54841	-6.54841	-6.54841	-6.54841	-6.54841	-6.54841	-6.54841	-6.54841	-6.54841	-6.54841	-6.54841	-6.54841	-6.54841	-0.378625
8.88178	8.88178	8.88178	8.88178	8.88178	8.88178	8.88178	8.88178	8.88178	8.88178	8.88178	8.88178	8.88178	8.88178	8.88178	-0.378625	-0.378625	-0.378625	-0.378625
1.99812	-0.3237	-0.3237	-0.3237	-0.3237	-0.3237	-0.3237	-0.3237	-0.3237	-0.3237	-0.3237	-0.3237	0.887045	0.887045	0.887045	0.887045	0.887045	0.887045	0.887045
0.46358	1.40676	1.40676	1.40676	-0.271893	-0.271893	-0.271893	-0.271893	-0.271893	-0.271893	2.6127	2.6127	2.6127	2.6127	2.6127	2.6127	2.6127	2.6127	2.6127
-2.48384	-2.48384	-2.48384	-2.48384	-2.48384	-2.48384	-2.48384	-2.48384	-2.48384	-2.48384	-2.48384	-2.48384	-2.48384	-2.48384	-2.48384	-2.48384	-2.48384	0.326633	0.326633
-7.32913	-7.32913	-7.32913	-5.90283	-5.90283	-5.90283	-5.90283	-4.80321	-4.80321	-4.80321	-4.80321	-4.375	-1.72045	-1.55915	-1.55915	-1.55915	-1.55915	-1.20387	0.620039
-0.29134	2.93702	4.76782	3.5971	4.34047	2.28615	2.28615	2.1088	2.1088	2.48771	2.64952	2.46453	2.46453	2.46453	1.30567	2.48184	2.48184	2.48184	2.39717
-2.6116	-4.11438	-6.07106	-0.293191	-0.741206	-0.860749	-0.860749	-0.860749	-0.809145	-1.35922	0.107841	-0.695856	-0.695856	-0.695856	-1.35569	-1.35569	-1.46604	-1.14128	-1.14128
4.56696	4.56696	4.56696	4.08624	4.08624	4.08624	2.04282	1.60377	1.60377	1.60377	1.60377	1.45421	1.45421	1.45421	1.45421	0.0847608	0.0847608	0.0847608	0.0847608
1.25385	0.628291	0.628291	0.628291	0.628291	0.628291	0.628291	0.628291	0.628291	0.628291	0.628291	0.628291	0.628291	0.360647	0.178841	0.178841	0.178841	0.178841	0.178841
11.904	11.904	11.904	11.904	11.904	11.904	11.904	11.904	11.904	11.904	11.904	11.904	11.904	11.904	11.904	11.904	11.904	11.904	11.904
-0.260109	-0.0804855	-0.0804855	-2.91701	-2.91701	-2.91701	-2.91701	-2.91701	-2.91701	-2.91701	-2.91701	-2.91701	-2.91701	-2.91701	-2.91701	-2.91701	-2.91701	-2.91701	-2.53801
-4.94536	-4.94536	-4.94536	-4.94536	-4.94536	-4.94536	-4.94536	-4.94536	-4.94536	-4.94536	-1.10187	-1.10187	-1.10187	-1.10187	-1.10187	-1.10187	-1.10187	-1.10187	-1.10187
3.97851	3.97851	3.97851	3.97851	3.97851	3.97851	3.97851	3.97851	3.97851	3.97851	3.97851	3.97851	3.97851	3.97851	3.97851	1.61639	1.61639	1.61639	1.61639
-4.48865	-4.48865	-4.48865	-4.48865	-4.48865	-4.48865	-4.48865	-4.48865	-4.48865	-4.48865	-4.48865	-4.48865	-4.48865	-4.48865	-3.20141	-3.20141	-3.20141	-3.20141	-3.20141
7.85147	7.85147	7.85147	7.85147	7.85147	7.85147	7.85147	7.85147	7.85147	7.85147	7.85147	7.85147	7.85147	7.85147	7.85147	7.85147	7.85147	7.85147	7.85147
	QQR	QR
0.05	0	0.427321
0.1	0.560048	0.33287
0.15	-6.54841	0.157011
0.2	-6.22368	0.157755
0.25	6.93222	0.194605
0.3	0.244564	0.198843
0.35	1.39825	0.233324
0.4	-2.188	0.261114
0.45	-4.09092	0.297299
0.5	2.51685	0.338999
0.55	-1.4222	0.363218
0.6	2.13544	0.372145
0.65	0.528852	0.390156
0.7	11.904	0.4014
0.75	-2.45864	0.429615
0.8	-3.12476	0.45358
0.85	3.48122	0.439904
0.9	-4.1499	0.46034
0.95	7.85147	0.649228
