# Supplementary material for: Macroeconomic Imbalances and Financial Stress Among BRICS: Analysis of Frequency-Dependent and Asymmetric Causal Nexuses
Source: publisher site journal article supplement (doi:10.1515/snde-2024-0045), 2025-04-16
Supplement: Supplementary file 59 [file IMF3.xlsx]

## Sheet: CA
-1.18823	-1.18823	-1.18823	-1.18823	-1.18823	-1.18823	-1.18823	-1.18823	-1.18823	-0.248214	-0.799314	-0.799314	-0.799314	-0.799314	-0.799314	-0.799314	-0.799314	-0.799314	-0.799314
0.360708	0.360708	0.360708	1.19535	4.04034	4.04034	4.04034	4.04034	4.04034	4.04034	4.04034	2.45561	0.0620697	-0.172838	-0.206489	2.19732	2.06036	2.06036	2.06036
-0.294068	-0.798843	-0.77466	-0.172838	-0.172838	-0.172838	-0.172838	0.0620697	0.0620697	-4.13109	-2.88827	-2.52701	-2.52701	-2.52701	-0.680576	-0.240432	-0.240432	-0.240432	1.13103
-1.25107	-1.25107	-1.25107	-1.72455	-1.72455	-1.72455	0.951155	0.945976	0.945976	0.956651	1.30544	2.71739	2.71739	2.37081	-0.680576	0.501147	0.501147	3.98863	1.13103
0.944756	0.944756	0.548396	0.548396	0.190533	-1.02179	-0.995441	-2.98182	-2.98182	-2.98182	-2.98182	-3.29348	-3.29348	-2.66085	-2.11869	-3.16916	-3.1796	-1.33636	-1.33636
-2.42443	-2.42443	-2.42443	-2.42443	-2.42443	-2.42443	-2.14371	-2.14371	-0.834718	-1.35299	-0.849765	-0.849765	-0.849765	-0.849765	-0.849765	1.0741	1.17882	1.17882	1.41879
-0.18507	-0.18507	0.462875	0.583258	1.21871	1.21871	1.21871	2.50018	2.50018	1.77497	1.05517	1.05517	0.902303	0.902303	0.902303	1.3422	-1.89454	-1.89454	-1.68896
1.24139	1.24139	1.24855	1.17791	0.917802	-0.437281	-0.437281	-1.41071	-0.632934	-0.632934	-0.182455	0.0514462	-0.329842	-0.329842	-0.329842	0.673071	0.673071	1.3422	0.532343
2.7387	1.98528	0.917802	0.65427	0.480266	-0.167475	-0.037606	-1.77685	0.762071	-0.363549	-0.363549	-0.596603	-0.596603	1.42493	1.42493	1.08486	1.08486	1.17341	-0.686415
0.142727	0.142727	0.480266	0.65427	2.49625	2.07033	2.07033	2.04549	0.411909	0.411909	0.411909	0.411909	-0.027435	-0.478919	0.125973	0.125973	-0.0717285	-0.875397	-0.485548
-0.183698	0.033537	1.09122	0.334554	0.417414	0.417414	-0.27396	-0.618193	-0.468463	-0.468463	-0.468463	-0.586852	0.379686	0.379686	0.379686	1.36093	1.36093	1.36093	1.6993
-0.840907	-2.93822	-2.83183	-2.49064	-2.49064	-2.46332	-2.46332	-1.24303	-1.30132	-1.12223	0.181441	0.973172	-1.36142	-1.03563	-0.399298	-0.30643	-1.14031	-1.50716	0.8523
-0.497581	-0.718963	0.480975	0.480975	-1.49568	3.84697	2.78067	3.76249	3.69237	3.88493	3.88493	2.29572	2.71569	2.71569	3.37292	2.68735	2.68735	1.64125	0.8523
1.44733	2.12122	2.3918	2.3918	-0.853578	-2.04524	-1.29533	-1.45876	-1.44154	-1.44154	-0.354883	-0.460234	-0.460234	-0.416609	-1.43211	-1.43211	-1.63431	-1.65874	-1.65874
-0.964619	-2.72411	-2.72411	-1.04574	-1.04574	-1.87614	-2.37723	-3.5288	-3.5288	-3.5288	-3.5288	-2.66297	-3.07527	-3.07527	-3.07527	-0.416609	2.73893	2.73893	1.2802
-0.964619	-2.13197	-2.13197	-2.13197	-1.87614	-0.615625	-0.615625	-0.615625	-0.615625	-0.615625	1.00229	0.719989	0.719989	0.719989	0.719989	0.313247	-1.29512	-1.29512	-1.29512
1.04625	1.04625	1.04625	1.04625	1.04625	0.802728	1.31808	1.31808	1.31808	1.31808	2.93805	2.93805	2.95631	1.47666	1.47666	1.47666	1.47666	1.47666	1.47666
-1.68186	-1.68186	-1.68186	-1.68186	2.13344	0.386211	0.386211	-2.63081	-6.60818	-6.60818	-6.60818	-6.60818	-6.60818	-11.7652	-4.66096	-1.3396	-1.3396	-1.3396	-1.3396
5.3635	5.3635	5.3635	5.3635	2.13344	0.386211	0.386211	0.386211	0.386211	0.0962756	0.0962756	0.0962756	0.0962756	-1.82194	-1.82194	-4.66096	-6.76645	-6.76645	-6.76645
	QQR	QR
0.05	-0.954533	0.0427797
0.1	2.16193	-0.056462
0.15	-0.910843	-0.0163824
0.2	0.496069	-0.0115151
0.25	-1.63977	0.0384673
0.3	-1.07474	0.0019324
0.35	0.620466	0.0545313
0.4	0.230318	0.0627973
0.45	0.481196	0.065695
0.5	0.529629	0.0701545
0.55	0.323537	0.108494
0.6	-1.25941	0.129507
0.65	2.05634	0.224733
0.7	-0.510094	0.264702
0.75	-1.70633	0.203189
0.8	-0.631824	0.15186
0.85	1.52625	0.129457
0.9	-3.22515	0.163795
0.95	-0.162462	0.124052

## Sheet: CGD
3.281	1.23291	-3.1277	-1.4744	-1.18509	0.770004	2.5202	2.49689	4.76255	3.7846	3.45637	3.46508	6.30283	7.86828	3.26618	-0.853318	-0.457801	4.20155	7.49224
3.281	1.23291	-3.1277	-1.4744	-1.18509	0.770004	2.5202	2.49689	4.76255	3.7846	3.45637	3.46508	6.30283	7.86828	3.26618	-0.853318	-0.457801	4.20155	7.49224
3.281	1.23291	-3.1277	-1.4744	-1.18509	0.770004	2.5202	2.49689	4.76255	3.7846	3.45637	3.46508	6.30283	4.64172	3.26618	-0.853318	-0.457801	4.20155	7.49224
3.281	1.23291	-3.1277	-1.4744	-1.33263	0.770004	1.49563	2.49689	4.76255	3.7846	3.16849	3.46508	5.03084	4.64172	3.26618	-0.853318	-0.457801	4.20155	7.49224
3.281	1.23291	-3.1277	-1.4744	-1.33263	0.770004	1.49563	2.49689	4.76255	3.7846	2.14235	3.46508	5.03084	4.64172	3.26618	-0.853318	-0.457801	4.20155	7.49224
3.281	1.23291	-3.1277	-1.4744	-1.33263	0.770004	1.49563	2.49689	4.76255	3.7846	1.78268	3.46508	5.03084	4.64172	3.26618	-0.853318	-0.457801	4.20155	7.49224
3.281	1.23291	-3.1277	-1.4744	-1.33263	0.770004	1.49563	2.49689	4.76255	3.7846	1.78268	3.46508	5.03084	4.64172	3.26618	-0.853318	-0.457801	4.20155	7.49224
3.281	1.23291	-3.1277	-1.4744	-1.33263	0.770004	1.49563	2.49689	2.81462	3.7846	1.78268	3.46508	5.03084	4.64172	3.26618	-0.853318	-0.457801	4.20155	7.49224
3.281	1.23291	-3.1277	-1.4744	-1.33263	0.770004	1.49563	2.49689	2.81462	2.69893	1.78268	3.46508	5.03084	4.64172	3.26618	-0.853318	-0.457801	4.20155	7.49224
3.281	1.23291	-3.1277	-1.4744	-1.33263	0.770004	1.49563	2.35462	2.81462	2.69893	1.78268	3.46508	5.03084	4.64172	3.26618	-0.853318	-0.457801	4.20155	7.49224
3.281	1.23291	-3.1277	-1.4744	-1.33263	0.770004	1.49563	2.35462	2.81462	2.69893	1.78268	3.46508	5.03084	4.64172	3.26618	-0.853318	-0.457801	4.20155	7.49224
3.281	1.23291	-3.1277	-1.4744	-1.33263	0.770004	1.49563	2.35462	2.39271	2.69893	1.78268	3.46508	5.03084	4.64172	3.26618	-0.853318	-0.457801	4.20155	7.49224
3.281	1.23291	-3.1277	-1.4744	-1.33263	0.770004	1.49563	2.35462	2.39271	2.69893	1.78268	3.46508	5.03084	4.64172	3.26618	-0.853318	-0.457801	4.20155	7.49224
3.281	1.23291	-3.1277	-1.4744	-1.33263	0.764263	1.49563	2.35462	2.39271	2.69893	1.78268	3.46508	5.03084	4.64172	3.26618	-0.853318	-0.457801	4.20155	7.49224
3.281	1.23291	-3.1277	-1.4744	-1.33263	0.764263	1.49563	2.35462	2.39271	2.69893	1.78268	3.46508	5.03084	4.64172	3.26618	-0.853318	-0.457801	4.20155	7.49224
3.281	1.23291	-3.1277	-1.4744	-1.33263	0.764263	1.49563	-1.25251	2.39271	1.84887	1.78268	3.46508	5.03084	4.64172	3.26618	-0.853318	-0.457801	4.20155	7.49224
3.281	1.23291	-3.1277	-1.4744	-1.33263	0.764263	1.49563	-1.25251	2.39271	1.84887	1.78268	3.46508	3.78385	4.64172	3.26618	-0.853318	-0.457801	4.20155	7.49224
3.281	1.23291	-3.1277	-1.4744	-1.33263	0.764263	-0.127845	-1.25251	2.39271	1.84887	1.78268	3.46508	3.78385	4.64172	3.26618	-0.853318	-0.457801	4.20155	7.49224
3.281	1.23291	-3.1277	-1.4744	-1.33263	0.764263	-0.127845	-1.25251	2.39271	1.84887	1.78268	3.46508	3.78385	4.64172	3.26618	-0.853318	-0.457801	4.20155	7.49224
	QQR	QR
0.05	2.51591	3.281
0.1	2.51591	1.23291
0.15	2.3461	-3.1277
0.2	2.20231	-1.4744
0.25	2.1483	-1.33263
0.3	2.12937	0.766939
0.35	2.12937	1.49563
0.4	2.02685	2.35462
0.45	1.96971	2.39271
0.5	1.96222	1.84887
0.55	1.96222	1.78268
0.6	1.94001	3.46508
0.65	1.94001	5.03084
0.7	1.93971	4.64172
0.75	1.93971	3.26618
0.8	1.70512	-0.853318
0.85	1.63949	-0.457801
0.9	1.55404	4.20155
0.95	1.55404	7.49224

## Sheet: OGAP
-10.4632	-10.4632	-10.4632	-10.4632	-10.4632	-10.4632	-10.4632	-10.4632	-10.4632	-10.4632	-10.4632	-0.939532	-2.02404	-2.02404	-2.02404	-2.02404	-2.02404	-2.02404	-2.02404
-1.77855	-1.77855	-1.77855	-1.77855	-1.77855	-1.77855	-1.77855	-1.77855	-0.939532	-0.939532	-0.939532	-0.939532	-0.939532	-0.939532	-0.939532	-0.939532	-0.939532	0.310696	0.310696
4.09706	4.09706	4.09706	4.09706	5.00322	5.00322	2.57707	2.57707	2.57707	-1.84428	-0.609843	-3.67612	-3.67612	-3.67612	-3.67612	-3.67612	-3.67612	-3.67612	-3.67612
2.57707	2.57707	2.57707	2.57707	2.57707	2.57707	2.57707	2.57707	2.57707	2.57707	2.57707	2.57707	2.57707	2.57707	2.57707	2.57707	2.57707	-0.529035	-3.67612
-0.529035	1.72133	6.81025	6.81025	6.81025	6.81025	6.81025	6.81025	6.81025	6.81025	6.81025	6.81025	6.81025	6.81025	6.81025	6.81025	6.81025	6.81025	1.41894
-4.4478	-4.4478	-4.4478	-4.4478	-0.483339	-0.483339	1.37143	1.72133	1.72133	-3.99571	-3.99571	-3.99571	-3.99571	-2.15845	-2.15845	-2.15845	-0.930715	-0.930715	-0.930715
3.20731	5.66797	5.66797	1.21849	1.21849	1.21849	1.21849	-2.16652	0.354987	0.354987	0.354987	0.354987	1.72467	1.72467	1.72467	0.188496	0.188496	0.188496	0.188496
-2.35317	-2.35317	-2.35317	-2.35317	-2.35317	-2.35317	-2.35317	-2.9065	-2.9065	-2.9065	-2.9065	-2.9065	-2.9065	-2.57266	-0.490653	-0.808923	-0.808923	-0.808923	-0.808923
-1.56342	-1.56342	-1.56342	-1.56342	-1.56342	-1.56342	-1.56342	-2.12789	-8.08156	-8.08156	-8.08156	-8.08156	-8.08156	-8.08156	-8.08156	-3.32792	-1.04245	-1.04245	-1.04245
-0.3299	0.319369	0.816693	0.816693	0.816693	0.816693	0.816693	0.816693	5.78669	3.40321	3.40321	3.40321	3.40321	4.0861	4.0861	4.0861	4.0861	4.0861	4.0861
-0.466061	1.29848	1.29848	1.29848	0.590652	-0.164939	-0.164939	-0.164939	-1.95336	-6.66902	-6.66902	-6.66902	-6.66902	-6.66902	-6.66902	-6.66902	-5.98932	-5.02841	-4.14107
-0.466061	-1.95336	-1.95336	-1.95336	-1.95336	-0.232579	-1.12652	-1.12652	-1.12652	-1.12652	-1.12652	-1.12652	-2.29525	-2.29525	-2.82497	-2.82497	-2.82497	-2.82497	-2.82497
2.55539	2.55539	2.55539	2.55539	2.55539	2.55539	2.55539	2.55539	2.55539	2.55539	2.55539	-1.12652	-1.12652	-1.12652	-1.12652	-1.12652	-1.12652	-2.29525	2.87646
-17.6638	-17.6638	-17.6638	-17.6638	-17.6638	-17.6638	-17.6638	-17.6638	-17.6638	-17.6638	-17.6638	-17.6638	-17.6638	-17.6638	-17.6638	-17.6638	-17.6638	-17.6638	-17.6638
5.56391	5.56391	5.56391	5.56391	5.56391	5.56391	5.56391	5.56391	5.56391	5.56391	5.56391	5.56391	5.56391	-1.68044	-2.31712	-2.31712	-2.31712	-2.31712	-2.31712
-4.25542	-4.25542	-4.25542	-4.25542	-4.25542	-1.68044	-1.68044	-1.68044	-1.68044	-1.68044	-1.68044	-1.68044	-1.68044	-1.68044	1.43507	1.43507	1.43507	1.43507	1.43507
8.81187	8.81187	8.81187	8.81187	8.81187	8.81187	8.81187	2.34063	2.34063	2.34063	2.34063	2.34063	-2.37194	-2.37194	-2.37194	-2.37194	-2.37194	-2.37194	-2.37194
-2.58637	-2.58637	-1.8487	-1.8487	-1.8487	-1.8487	-1.8487	-1.8487	-1.8487	-1.8487	-1.8487	-1.8487	-1.8487	-1.8487	-1.8487	-1.8487	-1.8487	-1.8487	-1.8487
-4.40301	-4.40301	-4.40301	-4.40301	-4.40301	-4.40301	-4.40301	-4.40301	-4.40301	-4.40301	-4.40301	-4.40301	-4.40301	-4.40301	-4.40301	-4.40301	-4.40301	-4.40301	-4.40301
	QQR	QR
0.05	-6.85281	0.108113
0.1	-1.1612	0.0371443
0.15	0.119095	-0.0255416
0.2	2.08448	-0.075003
0.25	5.87238	-0.177678
0.3	-2.06285	-0.177238
0.35	1.29466	-0.172906
0.4	-2.11632	-0.159639
0.45	-4.00516	-0.130467
0.5	2.56872	-0.174242
0.55	-3.17211	-0.11751
0.6	-1.78877	-0.103673
0.65	1.15428	-0.149695
0.7	-17.6638	-0.0546372
0.75	3.10867	-0.0725857
0.8	-1.5382	-0.0823244
0.85	2.98856	-0.0247383
0.9	-1.92635	0.0207701
0.95	-4.40301	-0.00648549
