# Supplementary material for: Macroeconomic Imbalances and Financial Stress Among BRICS: Analysis of Frequency-Dependent and Asymmetric Causal Nexuses
Source: publisher site journal article supplement (doi:10.1515/snde-2024-0045), 2025-04-16
Supplement: Supplementary file 60 [file IMF4.xlsx]

## Sheet: CA
-0.60131	-0.60131	-0.60131	-0.60131	-0.60131	-0.60131	-0.60131	-0.60131	-0.60131	0.152565	0.368546	0.368546	0.368546	0.368546	0.368546	0.368546	0.368546	0.368546	0.368546
-0.222141	-0.222141	-0.222141	-0.222141	-0.222141	-0.222141	-0.222141	-0.222141	-0.222141	0.0306178	0.0721108	0.0721108	0.0721108	0.0721108	0.0721108	0.0721108	0.0721108	0.0721108	0.0721108
0.621296	0.845561	0.845561	0.845561	0.845561	3.01236	5.31552	5.31552	5.31552	3.63179	4.83331	5.08934	5.08934	5.08934	5.08934	5.36379	5.62732	5.62732	5.62732
-0.804835	-0.214606	-0.214606	0.0569538	0.0569538	0.0569538	-3.87211	-2.48968	-2.52289	-2.52289	-3.05735	2.07673	1.49041	1.44254	1.44254	1.44254	1.43301	1.43301	1.43301
0.284155	0.151879	0.151879	0.151879	-0.110962	-0.129062	-0.129062	-0.129062	-0.0404993	0.490212	1.51247	1.51247	1.51247	-0.574486	-1.41785	-3.45272	-3.63768	-4.54094	-4.54094
-0.583261	-0.583261	-0.583261	-0.583261	-0.583261	-0.837331	-1.05973	-1.05973	-1.05973	-1.05973	-0.563779	-0.0134013	-0.149378	-0.149378	-0.149378	-0.149378	-0.149378	1.67442	0.487408
1.38191	1.38191	1.38191	1.38191	1.38191	1.38191	2.62029	0.689692	0.689692	0.689692	0.523336	0.523336	0.409959	-0.503677	-0.567233	-0.567233	-4.11714	-1.67842	-1.67842
-3.33843	-3.33843	-3.33843	-3.33843	-3.33843	2.0732	2.0732	0.754208	0.754208	0.754208	-0.808928	-0.808928	-0.178265	-0.178265	-0.178265	-2.73726	-6.87665	-6.87665	-6.87665
-0.479838	-1.19272	-1.76073	-1.76073	-1.15351	-0.276969	-0.182539	-0.182539	0.434761	0.434761	0.434761	0.434761	0.434761	0.434761	0.434761	-0.00349548	-0.00349548	1.63628	1.63628
1.59878	1.59878	1.59878	1.59878	1.59878	1.59878	-1.41054	-1.41054	-1.41054	-1.41054	-1.41054	-1.41054	-1.41054	-0.189988	-0.189988	-0.189988	-4.0867	-4.0867	-4.0867
-3.26259	-3.26259	-3.26259	-3.26259	-1.21522	-1.21522	-1.21522	-1.21522	-1.21522	-1.21522	-1.21522	-1.21522	-1.21522	-1.21522	0.0177801	2.53098	2.53098	2.53098	2.53098
0.585548	0.585548	0.585548	-2.05746	-4.95279	-4.95279	-4.95279	-4.95279	-4.95279	-0.382813	-0.382813	-1.87079	-1.87079	-1.87079	-1.87079	-1.87079	-1.87079	-4.14197	-2.32277
-3.68777	-3.68777	-3.68777	-3.68777	-3.68777	-8.17303	-1.61882	-1.61882	-1.61882	-1.61882	-1.61882	-1.15022	-7.05157	-7.05157	-7.05157	-7.05157	-7.05157	-7.05157	-7.05157
-3.09751	-3.09751	-3.09751	-3.09751	-2.53034	-2.75343	-4.42236	-4.42236	-4.42236	-4.42236	-4.42236	-4.42236	-4.42236	-1.66325	-3.79804	-2.85312	-0.818552	-0.596425	-0.596425
2.80507	2.05863	1.19865	1.19865	0.555923	0.555923	1.07667	1.07667	0.0843746	0.822076	0.822076	0.0678932	0.718016	0.718016	-1.64761	-1.64761	-1.64761	-1.18654	-1.18654
-0.172601	-0.172601	-0.172601	-0.172601	-0.830657	-0.570115	-0.459803	-3.03089	-3.05124	-0.928617	-0.928617	-0.928617	0.0217566	-0.26136	-0.672683	-0.672683	-0.265014	-0.265014	-0.431157
6.17111	6.17111	6.17111	6.17111	4.48912	6.4733	6.22116	6.22116	6.22116	2.44639	0.623318	0.48461	0.689927	0.689927	0.689927	0.131029	0.131029	0.0837989	0.0837989
-0.0344749	-0.0344749	-0.0344749	-0.0344749	-0.0344749	-0.0344749	-0.0344749	-0.0344749	-0.0344749	-0.0344749	-0.0344749	-0.0344749	-0.0344749	-0.0344749	-0.0404927	-0.0883943	-0.0883943	-0.0883943	-0.0883943
0.0906657	0.0906657	0.0906657	0.0906657	0.0906657	0.0906657	0.0906657	0.0906657	0.0906657	0.0906657	-0.146751	-0.146751	-0.146751	-0.146751	-0.146751	-0.146751	-0.146751	-0.146751	-0.146751
	QQR	QR
0.05	-0.102227	-0.337406
0.1	-0.0694556	-0.330472
0.15	3.89635	-0.313037
0.2	-0.17549	-0.301694
0.25	-0.680835	-0.133522
0.3	-0.376568	-0.145186
0.35	0.280281	-0.135689
0.4	-1.88437	-0.130683
0.45	-0.0358243	-0.106031
0.5	-0.69006	-0.0744849
0.55	-0.792674	-0.0678709
0.6	-2.29052	-0.0694543
0.65	-4.48511	-0.0755216
0.7	-3.10295	-0.122646
0.75	0.339092	-0.202232
0.8	-0.735006	-0.238456
0.85	3.17706	-0.317176
0.9	-0.0461431	-0.37276
0.95	-0.0217946	-0.364084

## Sheet: CGD
-26.8089	-22.5842	-16.2412	-12.8538	-10.2078	-7.33304	-5.74891	-4.56469	-5.00257	-4.97294	-4.25231	-3.89323	-5.66878	-9.00118	-13.1943	-15.0062	-16.3845	-24.2681	-29.1137
-26.8089	-22.5842	-16.2412	-12.8538	-10.2078	-7.33304	-5.74891	-4.56469	-5.00257	-4.98099	-4.25231	-3.89323	-5.66878	-9.00118	-13.1943	-15.0062	-16.3845	-24.2681	-29.1137
-26.8089	-22.5842	-16.2412	-12.8538	-10.2078	-7.33304	-5.74891	-4.56469	-5.00257	-4.98099	-4.25231	-3.89323	-5.66878	-9.00118	-13.494	-15.0062	-16.3845	-24.2681	-29.1137
-26.8089	-22.5842	-16.2412	-12.8538	-10.2078	-7.33304	-5.74891	-4.56469	-5.00257	-4.98099	-4.25231	-3.89323	-5.66878	-9.00118	-13.494	-15.0062	-16.3845	-24.2681	-29.1137
-26.8089	-22.5842	-16.2412	-12.8538	-10.2078	-7.04017	-4.45575	-4.56469	-5.00257	-4.98099	-4.25231	-4.13011	-6.0756	-9.00118	-13.494	-15.0062	-16.3845	-24.2681	-29.1137
-26.8089	-22.5842	-16.2412	-12.8538	-10.2078	-7.04017	-3.89153	-4.56469	-5.00257	-4.98099	-4.25231	-4.13011	-6.0756	-9.00118	-13.494	-15.0062	-16.3845	-24.2681	-29.1137
-26.8089	-22.5842	-16.2412	-12.8538	-10.1297	-7.04017	-3.89153	-4.56469	-5.00257	-4.98099	-4.25231	-4.18207	-6.0756	-9.00118	-13.494	-15.0062	-16.3845	-24.2681	-29.1137
-26.8089	-22.5842	-16.2412	-12.8538	-10.1297	-6.32881	-3.89153	-4.56469	-5.00257	-4.98099	-4.25231	-4.18207	-6.0756	-9.00118	-13.494	-15.0062	-16.3845	-24.2681	-29.1137
-26.8089	-22.5842	-16.2412	-12.8538	-10.1297	-6.32881	-3.89153	-4.56469	-5.00257	-4.98099	-4.25231	-4.18207	-6.0756	-9.00118	-13.494	-15.0062	-16.3845	-24.2681	-29.1137
-26.8089	-22.5842	-16.2412	-12.8538	-10.1297	-6.32881	-3.89153	-4.56469	-5.00257	-4.98099	-4.25231	-4.18207	-6.0756	-9.00118	-13.494	-15.0062	-16.3845	-24.2681	-29.1137
-26.8089	-22.5842	-16.2412	-12.8538	-10.1297	-6.32881	-3.89153	-4.56469	-5.00257	-4.97294	-4.25231	-4.18207	-6.0756	-9.00118	-13.494	-15.0062	-16.3845	-24.2681	-29.1137
-26.8089	-22.5842	-16.2412	-12.8538	-9.98332	-6.27111	-3.89153	-4.56469	-5.00257	-4.97294	-4.25231	-4.26675	-6.0756	-9.00118	-13.494	-15.0062	-16.3845	-24.2681	-29.1137
-26.8089	-22.5842	-16.2412	-12.8476	-9.98332	-6.27111	-3.89153	-4.56469	-5.00257	-4.97294	-4.25231	-4.26675	-6.0756	-9.00118	-13.494	-15.0062	-16.3845	-24.2681	-29.1137
-26.8089	-22.5842	-16.2412	-12.8476	-9.98332	-5.34057	-3.89153	-4.56469	-5.00257	-4.97294	-4.25231	-4.26675	-6.0756	-9.26233	-13.494	-15.0062	-16.3845	-24.2681	-29.1137
-26.8089	-22.5842	-16.2412	-12.8476	-9.31397	-5.34057	-3.89153	-4.56469	-5.00257	-4.97294	-4.25231	-4.26675	-6.0756	-9.26233	-13.494	-15.0062	-16.3845	-24.2681	-29.1137
-26.8089	-22.5842	-16.2412	-12.8476	-8.42684	-5.12023	-3.89153	-4.19611	-5.00257	-4.97294	-4.25231	-4.26675	-6.0756	-9.26233	-13.494	-15.0062	-16.3845	-24.2681	-29.1137
-26.8089	-22.5842	-16.2412	-12.2864	-8.42684	-5.12023	-3.89153	-4.19611	-5.00257	-4.97294	-4.25231	-4.26675	-6.0756	-9.26233	-13.494	-15.0062	-16.3845	-24.2681	-29.1137
-26.8089	-22.5842	-16.2412	-12.2864	-7.74807	-4.97244	-3.89153	-4.19611	-4.94436	-4.97294	-4.25231	-4.26675	-6.0756	-9.26233	-13.494	-15.0062	-16.0533	-24.2681	-29.1137
-26.8089	-22.5842	-16.2412	-12.2864	-7.74807	-4.97244	-3.50617	-4.19611	-4.65568	-4.97294	-4.25231	-4.26675	-6.0756	-9.26233	-13.494	-15.0062	-16.0533	-24.2681	-29.1137
	QQR	QR
0.05	-12.479	-26.8089
0.1	-12.4794	-22.5842
0.15	-12.4952	-16.2412
0.2	-12.4952	-12.4013
0.25	-12.4456	-9.98332
0.3	-12.4159	-6.27111
0.35	-12.4145	-3.89153
0.4	-12.3771	-4.56469
0.45	-12.3771	-5.00257
0.5	-12.3771	-4.97294
0.55	-12.3766	-4.25231
0.6	-12.3704	-4.18207
0.65	-12.37	-5.66878
0.7	-12.3348	-9.00118
0.75	-12.2996	-12.1277
0.8	-12.2219	-15.0062
0.85	-12.1923	-16.0533
0.9	-12.1283	-24.2681
0.95	-12.0929	-29.1137

## Sheet: OGAP
-0.416879	-0.416879	-0.416879	-0.416879	-0.416879	-0.416879	-0.589361	-0.589361	-0.589361	-0.589361	0.243823	0.243823	0.243823	0.243823	0.593393	0.593393	0.593393	0.593393	0.593393
-0.268912	-0.268912	-0.268912	-0.268912	-0.268912	-0.268912	-0.268912	-0.268912	-0.323171	-0.563553	0.0472794	0.0060129	0.0060129	0.0060129	0.0060129	0.0060129	0.0060129	0.0060129	0.0060129
-0.195955	-0.195955	-0.195955	-0.195955	-0.195955	-0.195955	-0.195955	-0.980935	-0.980935	-0.980935	-0.980935	-0.0368762	-0.0368762	-0.0368762	-0.0368762	-0.0368762	-0.0368762	-0.0368762	-0.0368762
-0.147107	-0.147107	-0.147107	-0.147107	-0.147107	-0.147107	-0.147107	-0.0595236	-0.0595236	-0.0595236	-0.0595236	-0.0595236	-0.0595236	-0.0595236	-0.0595236	-0.0595236	-0.0595236	-0.0595236	-0.0595236
-3.82201	-3.82201	-3.82201	-3.82201	-3.50111	-3.27805	-3.27805	-3.27805	-3.27805	-3.27805	-4.80011	-4.5059	-3.22015	-3.22015	-3.22015	-3.22015	-3.22015	-3.22015	-1.52583
-1.25358	-1.25358	-1.25358	-1.74052	-1.74052	3.62305	3.62305	2.78958	3.19081	3.19081	2.95724	2.95724	2.95724	3.08008	3.86863	3.86863	4.11756	4.11756	4.11756
-0.643821	-0.419655	-0.349649	-0.349649	0.748259	0.264345	0.313853	0.351647	0.0510365	-0.115015	0.127862	0.127862	0.314308	1.60468	1.4484	1.14475	1.84962	1.66562	1.39843
0.100652	0.100652	-0.547386	-0.547386	-1.66319	-1.03438	-0.595514	-0.235001	-0.235001	-0.214304	-0.250162	-0.226535	-0.226535	1.57847	1.14278	1.22607	0.705254	0.555518	0.555518
0.369357	0.369357	-0.290359	-1.96803	-1.96803	-0.724093	1.03077	-0.273299	-0.273299	-0.19302	-0.0460495	-0.0460495	-0.0460495	-0.0460495	0.388562	0.388562	0.77155	1.077	1.077
0.863957	0.863957	0.732513	0.0788441	0.0788441	0.0788441	-0.48484	-0.559929	-0.559929	-0.559929	-0.396646	-0.04405	0.0422085	-0.0780202	0.0543982	0.0543982	0.945038	0.976818	0.976818
1.18614	1.18614	0.0777283	0.379942	0.379942	-0.850033	-1.13943	-0.986661	-0.986661	-0.833052	-0.833052	0.0946194	0.0995107	1.56936	3.14334	-0.583031	4.23997	0.871617	0.871617
2.50353	2.64138	2.38692	2.46874	0.116545	0.116147	1.15845	0.843493	2.6798	2.28215	3.96567	8.77146	5.69392	3.87373	1.00697	0.914762	0.914762	0.914762	0.924327
0.564665	-0.687491	-0.687491	-1.0944	-1.0944	-0.0611719	-0.0611719	-0.33905	-0.33905	-0.33905	-1.24028	-1.24028	-1.92795	-2.56096	-7.01732	-7.55733	-7.09074	-7.09074	-7.23015
1.797	1.797	1.797	1.797	1.797	0.135964	0.135964	0.135964	0.135964	0.135964	0.135964	0.135964	-0.232763	-0.339931	-0.339931	-0.339931	-0.339931	-0.339931	-0.339931
-0.238367	-0.238367	-0.276698	-0.276698	-0.276698	-0.276698	-0.276698	-0.276698	-0.276698	-0.276698	-0.276698	-0.276698	-0.276698	-0.276698	-0.276698	-0.276698	-0.276698	-0.276698	-0.276698
0.0407085	0.0407085	0.0407085	0.0407085	0.0407085	0.0407085	0.0407085	0.0407085	0.0407085	0.0407085	0.0407085	0.0407085	0.0407085	0.0407085	0.0407085	0.0407085	0.0407085	0.0407085	0.0407085
0.106722	0.106722	0.106722	0.106722	0.106722	0.106722	0.106722	0.106722	0.106722	0.106722	0.106722	0.106722	0.106722	0.106722	0.106722	0.106722	0.106722	0.106722	0.106722
0.106722	0.106722	0.106722	0.106722	0.106722	0.106722	0.106722	0.106722	0.106722	0.106722	0.106722	0.106722	0.106722	0.106722	0.106722	0.106722	0.106722	0.323771	0.323771
0.306795	0.306795	0.306795	0.306795	0.306795	0.306795	0.306795	0.306795	0.306795	-1.69272	-1.69272	-1.69272	-1.69272	-1.69272	-1.69272	-1.69272	-1.69272	-1.69272	-1.69272
	QQR	QR
0.05	-0.0482348	0.357331
0.1	-0.154876	0.260421
0.15	-0.294234	0.1095
0.2	-0.0917913	0.0509997
0.25	-3.43854	-0.0146312
0.3	2.16933	-0.0381639
0.35	0.50173	-0.0468545
0.4	0.00997476	-0.0569119
0.45	-0.0211667	-0.0661109
0.5	0.161226	-0.079431
0.55	0.415158	-0.067851
0.6	2.32513	-0.0757519
0.65	-2.47865	-0.0622459
0.7	0.403389	-0.0163906
0.75	-0.272663	0.0800705
0.8	0.0407085	0.222094
0.85	0.106722	0.335493
0.9	0.129569	0.469567
0.95	-0.745579	0.537433
