# Supplementary material for: Macroeconomic Imbalances and Financial Stress Among BRICS: Analysis of Frequency-Dependent and Asymmetric Causal Nexuses
Source: publisher site journal article supplement (doi:10.1515/snde-2024-0045), 2025-04-16
Supplement: Supplementary file 61 [file Residual.xlsx]

## Sheet: CA
0.841442	0.831735	0.831735	0.831735	0.831506	0.831506	0.841002	0.831124	0.831124	0.840561	0.840561	0.839972	0.839972	0.848917	0.848133	0.848133	0.856628	0.863741	0.871468
0.876092	0.876092	0.875965	0.875965	0.883654	0.875711	0.875711	0.883346	0.875329	0.882914	0.874818	0.882358	0.874178	0.881676	0.880868	0.888012	0.87993	0.893857	0.899244
0.930713	0.924709	0.930614	0.930614	0.924556	0.930415	0.9243	0.930117	0.923942	0.929718	0.92348	0.929218	0.922913	0.928616	0.922241	0.921463	0.920577	0.919582	0.924039
0.971731	0.971731	0.97165	0.97165	0.975997	0.971488	0.971488	0.971245	0.971245	0.97092	0.97092	0.970513	0.970513	0.970023	0.965143	0.964513	0.963795	0.962989	0.961108
1.01043	1.00702	1.00702	1.01037	1.00692	1.00692	1.01023	1.00675	1.01004	1.00652	1.00652	1.00622	1.00622	1.00585	1.00541	1.00165	1.00109	1.00046	0.998993
1.03443	1.03443	1.03707	1.03437	1.03437	1.03426	1.03426	1.03426	1.03409	1.03409	1.03386	1.03386	1.03357	1.03357	1.03322	1.03027	1.02983	1.02933	1.02814
1.05396	1.05612	1.05612	1.05391	1.05605	1.05605	1.05381	1.05592	1.05592	1.05365	1.05574	1.05345	1.05552	1.05319	1.05524	1.05288	1.05252	1.05211	1.05111
1.07005	1.07184	1.07184	1.07184	1.07177	1.07177	1.07177	1.07166	1.07166	1.06977	1.0715	1.0715	1.07129	1.06935	1.07103	1.06907	1.06874	1.06836	1.06954
1.08342	1.08491	1.08491	1.08491	1.08485	1.08485	1.08485	1.08474	1.08474	1.08316	1.08459	1.08459	1.0844	1.0844	1.08416	1.08251	1.08388	1.08186	1.08277
1.09457	1.09581	1.09581	1.09581	1.09575	1.09575	1.09575	1.09565	1.09565	1.09433	1.09551	1.09551	1.09532	1.09532	1.0951	1.09371	1.09483	1.09453	1.09378
1.10384	1.10487	1.10487	1.10487	1.10481	1.10481	1.10481	1.10471	1.10471	1.10361	1.10458	1.10458	1.1044	1.1044	1.10418	1.10393	1.10393	1.10449	1.10292
1.11148	1.11232	1.11232	1.11232	1.11226	1.11226	1.11226	1.11216	1.11216	1.11203	1.11203	1.11203	1.11186	1.11258	1.11165	1.1114	1.11208	1.11078	1.11103
1.11895	1.11829	1.11829	1.11891	1.11823	1.11823	1.11883	1.11814	1.11872	1.11872	1.118	1.11857	1.11783	1.11837	1.11814	1.11787	1.11787	1.11721	1.11723
1.12331	1.12331	1.12374	1.12327	1.12368	1.1232	1.1232	1.12359	1.12308	1.12345	1.12292	1.12327	1.12273	1.12305	1.1228	1.12307	1.12275	1.12239	1.1218
1.12666	1.12666	1.12662	1.12662	1.12678	1.12654	1.12667	1.12641	1.12653	1.12625	1.12634	1.12604	1.12612	1.1259	1.12604	1.12593	1.12587	1.12641	1.12779
1.12728	1.12731	1.12734	1.12739	1.12739	1.12749	1.12785	1.12777	1.12828	1.12814	1.1288	1.12941	1.13044	1.1313	1.13226	1.13508	1.1364	1.14295	1.15423
1.13659	1.13892	1.13932	1.13932	1.13998	1.13998	1.14092	1.14213	1.14213	1.1436	1.14709	1.14901	1.15116	1.15548	1.15805	1.16611	1.16933	1.17636	1.18419
1.17463	1.17497	1.18158	1.17565	1.18246	1.17667	1.1837	1.1853	1.17976	1.18726	1.18959	1.19229	1.20118	1.19538	1.19886	1.20275	1.20703	1.20661	1.20685
1.24633	1.23425	1.2468	1.23493	1.23606	1.24918	1.23765	1.25109	1.2397	1.24222	1.24222	1.24521	1.2487	1.2487	1.25268	1.25718	1.24732	1.24357	1.24127
	QQR	QR
0.05	0.842158	1.10373
0.1	0.880827	1.10345
0.15	0.925886	1.10274
0.2	0.969403	1.10207
0.25	1.00603	1.10204
0.3	1.03322	1.09964
0.35	1.05438	1.09907
0.4	1.07076	1.09756
0.45	1.08413	1.09433
0.5	1.09518	1.09291
0.55	1.10439	1.09072
0.6	1.11195	1.08724
0.65	1.11823	1.08485
0.7	1.12309	1.08324
0.75	1.12643	1.08194
0.8	1.13143	1.07767
0.85	1.15051	1.07692
0.9	1.18961	1.07507
0.95	1.24448	1.07521

## Sheet: CGD
-4.10009	-4.04368	-4.09555	-4.12745	-4.17132	-4.27618	-4.34126	-4.53389	4.54919	4.31692	4.16005	4.00996	3.92132	3.81413	3.78257	3.71639	3.66705	3.63353	3.69057
-4.08909	-4.04368	-4.05892	-4.08558	-4.13695	-4.17181	-4.33814	-4.42278	4.54945	4.3344	4.16005	4.00996	3.85577	3.71932	3.63995	3.59815	3.60773	3.57187	3.5506
-4.00658	-4.01732	-3.97845	-4.0145	-4.0543	-4.17181	-4.2355	5.00748	4.71081	4.3344	4.16005	4.00996	3.81808	3.71932	3.63995	3.57798	3.53216	3.5013	3.48444
-3.99689	-3.96254	-3.93903	-3.96691	-4.03658	-4.08698	-4.23236	5.00839	4.71081	4.3399	4.16005	3.95392	3.79473	3.70429	3.63902	3.57798	3.53216	3.49249	3.46738
-3.99689	-3.93925	-3.91117	-3.91361	-3.95599	-4.01029	-4.14578	5.1868	4.71475	4.3399	4.16005	3.9002	3.79473	3.70429	3.60046	3.55615	3.49222	3.49249	3.46738
-3.99689	-3.89582	-3.87303	-3.87071	-3.8898	-3.93884	5.76856	5.18928	4.73019	4.47954	4.16005	3.9002	3.77591	3.65776	3.55603	3.48127	3.46951	3.44586	3.46738
-3.99689	-3.84855	-3.81686	-3.81075	-3.82969	-3.87139	5.76951	5.19778	4.89359	4.48098	4.16005	3.9002	3.77591	3.59009	3.51911	3.48127	3.42447	3.44586	3.46738
-3.90441	-3.83488	-3.75233	-3.75299	-3.77502	6.72572	5.99479	5.39392	4.89359	4.48098	4.16005	3.9002	3.72741	3.59009	3.51911	3.45683	3.42447	3.43004	3.42817
-3.90441	-3.77599	-3.69753	-3.70059	-3.68209	7.00171	5.99765	5.39538	4.89359	4.48098	4.16005	3.9002	3.68363	3.59009	3.5151	3.42997	3.42447	3.38535	3.41632
-3.90441	-3.77472	-3.65188	-3.62075	7.92113	7.01112	6.2383	5.59675	4.90515	4.48098	4.16005	3.88273	3.68363	3.56264	3.44338	3.42997	3.41399	3.38535	3.41632
-3.90441	-3.71816	-3.61481	9.39333	8.26698	7.30024	6.2383	5.60897	5.06781	4.48098	4.16005	3.88273	3.68363	3.51172	3.44338	3.39022	3.36598	3.38468	3.41632
-3.82847	-3.67019	-3.56048	9.80271	8.62475	7.30565	6.50174	5.60897	5.06781	4.48098	4.16005	3.82293	3.62129	3.51172	3.44338	3.39022	3.36598	3.38468	3.41632
-3.82847	12.912	11.5654	9.80749	8.63467	7.62355	6.50174	5.81298	5.06781	4.50712	4.16005	3.7988	3.62129	3.51172	3.44293	3.39022	3.36105	3.38468	3.41632
14.3822	12.912	11.5654	10.2348	9.01589	7.62355	6.77849	5.81298	5.06781	4.50712	4.09867	3.7988	3.59818	3.47434	3.44293	3.36048	3.36105	3.38468	3.41632
14.3822	13.332	12.0257	10.239	9.01589	7.94707	6.77849	6.05664	5.26221	4.50712	4.05199	3.7988	3.59818	3.47434	3.37617	3.36048	3.36105	3.38468	3.41632
14.3822	13.332	12.0257	10.6752	9.41505	7.9742	7.0596	6.05664	5.26221	4.50712	4.05199	3.70503	3.59818	3.47434	3.37617	3.36048	3.36105	3.38468	3.41632
14.3822	13.3331	12.0257	10.6752	9.41505	8.31361	7.0596	6.05664	5.26221	4.50712	4.05199	3.70503	3.52335	3.45204	3.37617	3.36048	3.36105	3.38468	3.41632
14.6302	13.7262	12.4977	11.1512	9.43797	8.31361	7.0596	6.05664	5.26221	4.48098	3.94786	3.70503	3.52335	3.45204	3.37617	3.36048	3.36105	3.38468	3.41632
14.6302	13.7262	12.4977	11.1512	9.84637	8.31361	7.34781	6.28625	5.26221	4.48098	3.94786	3.70316	3.52335	3.45204	3.36883	3.36048	3.36598	3.38468	3.41632
	QQR	QR
0.05	0.503803	-3.8323
0.1	0.486858	-3.68017
0.15	1.00092	-3.62898
0.2	1.00841	8.26266
0.25	1.02823	7.00171
0.3	1.55876	6.23391
0.35	1.57537	5.58782
0.4	2.16346	5.04363
0.45	2.18494	4.75465
0.5	2.81999	4.35709
0.55	3.54515	4.13951
0.6	3.60263	3.88273
0.65	5.29954	3.73827
0.7	6.30714	3.63567
0.75	6.3878	3.56413
0.8	6.44306	3.48395
0.85	6.45587	3.45069
0.9	6.53386	3.44635
0.95	6.58239	3.46738

## Sheet: OGAP
-0.331315	-0.394855	-0.394855	-0.330697	-0.393673	-0.393673	0.566687	0.621029	0.621029	0.618857	0.618857	0.617243	0.617243	0.617243	0.616174	0.616174	0.559399	0.615641	0.615641
0.641354	0.635761	0.712638	0.631094	0.627121	0.566687	0.564364	0.564364	0.517594	0.51629	0.478886	0.478886	0.447962	0.478239	0.447542	0.447542	0.447332	0.447332	0.447332
0.641354	0.526557	0.424792	0.36491	0.336462	0.349493	0.336211	0.336211	0.324346	0.324346	0.336057	0.324246	0.324246	0.324246	0.324246	0.324246	0.313616	0.313616	0.313616
0.28145	0.274697	0.280631	0.273892	0.273892	0.273892	0.273892	0.273388	0.273388	0.273388	0.273388	0.273388	0.273388	0.273388	0.267316	0.267316	0.267316	0.267316	0.267316
0.25542	0.254348	0.254348	0.254348	0.254348	0.250475	0.250475	0.253695	0.253695	0.253695	0.253695	0.253695	0.250057	0.250057	0.250057	0.250057	0.250057	0.250057	0.250057
0.243922	0.242968	0.242968	0.242968	0.24078	0.24078	0.242399	0.242399	0.242399	0.242399	0.242399	0.242399	0.242399	0.240411	0.240411	0.240411	0.240411	0.240411	0.240411
0.238751	0.237426	0.237426	0.237426	0.238041	0.236904	0.236904	0.236904	0.236904	0.236904	0.236904	0.236904	0.236904	0.237689	0.237689	0.237689	0.237689	0.237689	0.237689
0.236402	0.236402	0.236178	0.236178	0.236178	0.236178	0.235894	0.23599	0.23599	0.23599	0.23599	0.23599	0.235918	0.235918	0.236137	0.236137	0.236137	0.236419	0.236419
0.23768	0.23768	0.23768	0.23768	0.23768	0.23768	0.23768	0.23768	0.23768	0.236932	0.236932	0.236932	0.236932	0.238012	0.238012	0.238012	0.238012	0.23743	0.23868
0.243653	0.243653	0.243653	0.243653	0.243653	0.243653	0.243653	0.241904	0.241904	0.241904	0.241904	0.243995	0.243995	0.243995	0.246449	2.90528	2.6627	2.90365	3.01553
0.253954	0.253954	0.253954	0.253954	0.254322	3.38632	4.12743	4.57474	5.08269	3.68009	3.97345	4.28412	4.28412	4.60887	3.45587	3.6404	3.6404	3.81783	3.01553
0.260997	0.260997	0.261384	0.261384	2.35254	-0.309313	-0.307391	-0.308385	-0.306504	-0.307762	-0.305945	-0.305945	-0.305548	-0.305548	-0.305548	-0.30531	-0.30531	-0.30531	-0.303667
0.269536	0.274603	0.274603	0.269948	-2.68021	-0.321457	-0.320516	-0.319766	-0.321087	-0.320564	-0.320564	-0.320174	-0.320174	-0.318372	-0.319915	-0.319915	-0.318175	-0.319786	-0.319786
0.292214	0.292214	0.299525	0.292698	0.300289	-1.75825	-0.340543	-0.338866	-0.337563	-0.339341	-0.336615	-0.338417	-0.335997	-0.335997	-0.337827	-0.335665	-0.335665	-0.337541	-0.337541
0.325344	0.325344	0.336018	0.336018	0.325861	0.326723	-1.46659	-0.371411	-0.368488	-0.366116	-0.360754	-0.364324	-0.359295	-0.363132	-0.363132	-0.363132	-0.358418	-0.362538	-0.362538
0.402126	0.387015	0.387015	0.401917	0.401917	0.386791	0.386569	-1.02337	-0.431157	-0.417563	-0.417563	-0.415424	-0.415424	-0.406447	-0.41401	-0.41401	-0.405417	-0.413307	-0.413307
0.518071	0.494823	0.494823	0.51774	0.494362	0.51708	0.516091	0.538817	-0.6407	-0.5539	-0.528961	-0.510966	-0.525674	-0.508287	-0.523376	-0.506534	-0.506534	-0.505678	-0.505678
0.711219	0.756727	0.71066	0.755795	0.754244	0.804452	0.80169	0.798256	-0.841863	-0.84745	-0.833354	-0.821574	-0.812157	-0.764637	-0.759181	-0.719247	-0.755591	-0.716823	-0.753811
1.10644	1.21669	1.10523	1.21454	1.10281	1.21096	1.0992	1.09442	0.9955	-1.10011	-1.08167	-1.16862	-1.15296	-1.05427	-1.14091	-1.04571	-1.1329	-1.04065	-1.12893
	QQR	QR
0.05	0.29906	0.324948
0.1	0.53149	0.32099
0.15	0.361201	0.326904
0.2	0.272771	0.328404
0.25	0.252244	0.333512
0.3	0.241771	0.34059
0.35	0.237391	0.351471
0.4	0.236129	0.369621
0.45	0.237632	0.386067
0.5	0.796778	0.41288
0.55	2.99169	0.444462
0.6	-0.0468517	0.479796
0.65	-0.319567	0.523408
0.7	-0.245731	0.571674
0.75	-0.202872	0.624216
0.8	-0.149139	0.701271
0.85	-0.0907622	0.78208
0.9	-0.133297	0.861827
0.95	-0.0474189	-0.301013
