# Supplementary material for: Macroeconomic Imbalances and Financial Stress Among BRICS: Analysis of Frequency-Dependent and Asymmetric Causal Nexuses
Source: publisher site journal article supplement (doi:10.1515/snde-2024-0045), 2025-04-16
Supplement: Supplementary file 62 [file Signal.xlsx]

## Sheet: CA
	QQR	QR
0.05	#DIV/0!
0.1	#DIV/0!
0.15	#DIV/0!
0.2	#DIV/0!
0.25	#DIV/0!
0.3	#DIV/0!
0.35	#DIV/0!
0.4	#DIV/0!
0.45	#DIV/0!
0.5	#DIV/0!
0.55	#DIV/0!
0.6	#DIV/0!
0.65	#DIV/0!
0.7	#DIV/0!
0.75	#DIV/0!
0.8	#DIV/0!
0.85	#DIV/0!
0.9	#DIV/0!
0.95	#DIV/0!

## Sheet: CGD
-13.2944	-12.9869	-12.0323	-10.1517	-9.329	-9.44725	-8.70951	-5.32161	-4.66217	-7.55301	-0.17155	3.71283	8.55473	13.2834	13.0105	15.5229	17.1805	29.4359	35.9988
-13.2944	-12.9869	-12.0323	-10.1517	-9.329	-9.44725	-8.70951	-6.14148	-5.1365	-7.55301	-3.71474	3.71283	5.85698	10.1986	12.7554	13.9799	17.1805	28.1205	22.7989
-13.2944	-12.9869	-12.0323	-11.5816	-10.1114	-9.44725	-10.2037	-6.28992	-7.47379	-8.06147	-8.24985	3.21338	3.28479	9.14027	10.5364	12.8761	16.1327	14.8217	18.7126
-13.2944	-12.9869	-12.5242	-11.5816	-10.75	-9.82297	-10.2037	-7.37265	-9.10776	-8.12983	-8.94483	0.104148	3.28479	3.82833	10.3701	12.8761	13.9309	14.8217	18.7126
-13.2944	-12.9869	-12.636	-11.5816	-11.488	-11.7331	-11.2226	-8.23101	-9.10975	-8.12983	-8.94483	-1.39969	1.29261	3.82833	10.3701	12.2192	12.8532	12.7323	9.84222
-13.2944	-12.9869	-12.636	-12.2754	-11.488	-11.7331	-11.2226	-8.23101	-9.14212	-8.12983	-9.61585	-1.39969	1.29261	3.78179	7.74664	12.2192	12.8532	12.7323	9.84222
-13.2944	-13.4186	-12.636	-12.497	-11.5617	-11.7987	-11.6808	-8.23101	-9.14212	-8.12983	-9.61585	-2.25308	1.29261	3.78179	7.74664	11.0965	10.1548	6.44482	9.84222
-13.2944	-13.4186	-12.636	-12.822	-11.7666	-11.7987	-12.596	-11.8101	-9.14212	-8.12983	-9.61585	-5.04187	-0.808512	3.46185	6.96607	9.54614	9.53376	6.44482	7.50801
-13.2944	-13.4186	-12.636	-12.822	-11.7666	-12.1706	-12.596	-11.8101	-9.14212	-8.12983	-9.61585	-5.04187	-0.808512	1.69883	6.39453	6.50368	9.53376	6.44482	3.02906
-13.2944	-13.4186	-12.636	-12.822	-11.9308	-12.2697	-12.596	-11.8101	-9.14212	-8.12983	-9.61585	-5.04187	-0.808512	1.69883	2.11368	4.80557	8.46981	4.35222	3.02906
-13.2944	-13.4186	-12.636	-12.822	-14.5027	-12.2697	-12.596	-11.8101	-9.14212	-8.12983	-9.61585	-5.04187	-0.808512	1.69883	1.58387	4.27521	5.72731	4.28639	3.02906
-13.2944	-12.9869	-12.636	-12.822	-14.5407	-12.2697	-12.596	-11.8101	-9.14212	-8.12983	-9.61585	-5.04187	-1.79636	1.69883	1.58387	4.27521	5.72731	4.28639	3.02906
-13.2944	-12.9869	-12.636	-12.822	-14.5679	-12.2697	-12.596	-11.8101	-9.05261	-8.06147	-8.24985	-5.04187	-1.79636	1.53453	1.42677	3.57695	-1.34472	1.43387	3.02906
-13.2944	-12.9869	-12.636	-12.822	-14.5679	-12.2697	-12.596	-10.8882	-9.05261	-7.98819	-4.69247	-4.33911	-1.79636	-2.68167	1.40614	1.66662	-1.85273	0.804435	3.02906
-13.2944	-12.8293	-12.5242	-12.822	-14.5679	-12.2697	-11.2226	-10.8882	-9.05261	-7.98819	-4.69247	-1.39969	-1.99557	-2.68167	1.40614	1.66662	-1.85273	-1.31181	2.29882
-13.2944	-11.1207	-12.5242	-12.822	-14.5679	-12.2697	-11.1164	-7.68576	-8.69072	-7.58348	-4.47418	-1.39969	-1.99557	-3.35355	-0.153205	-5.65878	-3.11114	-5.13457	2.29882
-13.2944	-11.1207	-12.2151	-12.6587	-14.5679	-12.1706	-10.6651	-7.52066	-8.30313	-5.1365	-3.94589	-1.39969	-1.99557	-3.35355	-1.10155	-6.4821	-7.76527	-7.01885	2.14629
-12.6847	-11.0951	-12.0229	-12.6587	-14.5407	-11.3638	-10.4627	-5.87881	-6.28992	-4.44532	-3.94589	-1.12737	-1.99557	-4.30079	-1.29684	-7.4675	-9.04613	-8.5578	-3.69695
-11.7927	-11.0951	-11.6824	-12.4945	-13.3955	-10.7641	-10.4627	-5.30009	-5.18924	-1.70502	-0.970477	-1.12737	-2.18058	-4.48886	-9.32717	-10.9107	-9.35071	-8.5578	-3.69695
	QQR	QR
0.05	2.26528	-13.2944
0.1	0.847731	-12.8293
0.15	-1.10604	-12.5242
0.2	-1.93632	-12.6587
0.25	-3.03262	-11.7188
0.3	-3.24668	-10.2621
0.35	-3.88946	-11.1164
0.4	-4.70631	-7.18027
0.45	-5.24462	-6.0521
0.5	-5.7393	-7.3715
0.55	-6.07827	-4.96459
0.6	-6.10953	-1.39969
0.65	-6.60677	-0.546778
0.7	-6.71358	1.98648
0.75	-6.63271	3.33655
0.8	-7.08722	6.35045
0.85	-7.29311	9.21987
0.9	-7.51987	9.35781
0.95	-7.60484	7.50801

## Sheet: OGAP
20.9281	20.9281	20.9281	20.9281	20.9281	20.9281	20.9281	20.9281	20.9281	20.9281	20.9281	20.9281	20.9281	20.9281	20.9281	20.9281	20.9281	20.9281	20.9281
7.67635	12.0413	12.0413	12.0413	12.0413	12.0413	12.0413	12.0413	12.0413	12.0413	12.0413	12.0413	12.0413	12.0413	12.0413	12.0413	12.0413	12.0413	12.0413
-0.269249	-0.269249	-0.269249	-0.269249	-0.269249	-0.269249	-0.269249	-0.269249	-0.269249	-0.269249	-0.269249	-0.269249	-0.269249	-0.269249	-0.269249	-0.269249	-0.269249	-0.269249	-0.269249
11.5376	11.5376	11.5376	11.5376	11.5376	11.5376	11.5376	11.5376	11.5376	11.5376	11.5376	11.5376	11.5376	11.5376	11.5376	11.5376	11.5376	11.5376	11.5376
19.1098	19.1098	19.1098	19.1098	19.1098	19.1098	19.1098	19.1098	19.1098	19.1098	19.1098	19.1098	19.1098	19.1098	14.7772	14.7772	14.7772	14.7772	14.7772
-3.47879	-10.0115	-10.0115	-10.0115	-10.0115	-10.0115	-10.0115	-10.0115	-10.0115	-10.0115	-10.0115	-1.98938	-1.85364	-1.85364	-1.85364	-1.85364	-1.85364	-1.85364	-1.85364
-10.0115	-10.0115	-10.0115	-10.0115	-10.0115	-10.0115	-10.0115	-10.0115	-10.0115	-10.0115	-15.1454	-15.1454	-15.1454	-15.1454	-15.1454	-15.1454	-15.1454	-15.1454	-0.437596
-5.5342	-5.5342	-5.5342	-5.5342	-5.5342	-5.5342	-5.5342	-5.5342	-5.5342	-5.5342	-5.5342	-5.5342	-5.5342	-5.5342	-5.5342	-5.5342	-5.5342	12.7196	16.7025
15.3361	15.3361	15.3361	15.3361	20.4008	20.4008	20.4008	20.4008	28.1928	28.1928	17.0239	-2.75482	2.58617	2.58617	2.58617	2.58617	2.58617	2.58617	2.58617
0.965327	0.965327	-10.7334	-10.7334	-10.7334	-10.7334	-12.5703	-12.5703	-12.5703	-3.31257	-3.31257	-3.31257	-3.31257	-3.86785	-3.86785	-3.86785	-6.47206	-6.47206	-6.47206
-15.2726	-15.2726	-15.2726	-15.2726	-15.2726	-15.2726	-15.2726	-15.2726	-15.2726	-15.2726	-15.2726	-15.2726	-15.2726	-15.2726	-15.2726	-15.2726	-15.2726	-7.06043	-7.06043
-7.23343	-0.144705	2.13967	2.13967	2.13967	2.13967	2.13967	2.13967	2.13967	2.13967	2.13967	2.13967	2.13967	2.13967	2.13967	1.11416	1.11416	1.11416	1.11416
-7.05802	-5.70522	-5.70522	-5.70522	-5.70522	1.7385	1.7385	5.06649	5.06649	5.06649	3.5456	3.5456	3.5456	33.945	33.945	33.945	33.945	33.945	-0.245081
9.85514	9.85514	17.3272	17.3272	17.3272	17.3272	17.3272	17.3272	19.7821	19.7821	19.7821	19.7821	19.7821	19.7821	19.7821	19.7821	19.7821	11.1275	4.55262
-11.4441	-11.4441	-11.4441	-11.4441	-17.9473	-17.9473	-17.9473	-4.87122	-4.87122	-4.87122	-4.87122	-4.87122	-4.87122	-4.35471	-9.09077	-9.09077	-9.09077	-9.09077	-9.09077
2.74443	0.851902	0.851902	0.851902	0.851902	0.851902	0.851902	0.851902	0.851902	0.851902	0.851902	0.851902	0.851902	0.261383	0.261383	0.261383	0.261383	0.261383	0.261383
-5.1763	-5.1763	-5.1763	-5.1763	-5.1763	-5.1763	60.6985	60.6985	60.6985	60.6985	60.6985	60.6985	60.6985	60.6985	60.6985	60.6985	60.6985	60.6985	60.6985
17.9348	17.9348	17.9348	17.9348	17.9348	17.9348	17.9348	17.9348	17.9348	17.9348	17.9348	17.9348	17.9348	17.9348	17.9348	17.9348	17.9348	17.9348	1.49553
-54.8819	-54.8819	-54.8819	-54.8819	-54.8819	-54.8819	-54.8819	-54.8819	-54.8819	-54.8819	-54.8819	-54.8819	-54.8819	-54.8819	-54.8819	-54.8819	-54.8819	-54.8819	-54.8819
	QQR	QR
0.05	20.9281	0.0802964
0.1	11.8116	0.258029
0.15	-0.269249	0.08798
0.2	11.5376	0.229079
0.25	17.9697	0.19526
0.3	-6.23995	0.282592
0.35	-11.6693	0.100201
0.4	-3.40312	-0.0774854
0.45	12.195	-0.0867796
0.5	-6.47283	0.116267
0.55	-14.4082	0.100249
0.6	1.31022	0.371844
0.65	8.89023	-0.101623
0.7	16.7049	0.299356
0.75	-9.40286	0.281543
0.8	0.765029	0.306391
0.85	39.8959	0.383875
0.9	17.0696	0.0919138
0.95	-54.8819	-0.0665844
