# Supplementary material for: Macroeconomic Imbalances and Financial Stress Among BRICS: Analysis of Frequency-Dependent and Asymmetric Causal Nexuses
Source: publisher site journal article supplement (doi:10.1515/snde-2024-0045), 2025-04-16
Supplement: Supplementary file 63 [file IMF1.xlsx]

## Sheet: CA
6.80597	6.80597	6.80597	6.80597	6.80597	6.80597	6.80597	6.80597	6.80597	6.80597	6.80597	6.80597	6.80597	6.80597	6.80597	6.80597	6.80597	6.80597	6.80597
1.07182	1.07182	1.07182	1.07182	1.07182	1.07182	1.07182	1.07182	1.07182	1.07182	1.25878	1.25878	1.25878	1.25878	1.25878	1.25878	1.25878	1.25878	1.25878
5.89087	5.89087	5.89087	5.89087	6.40459	6.40459	6.40459	6.40459	6.40459	6.40459	7.33685	7.33685	7.33685	7.33685	7.33685	7.33685	7.33685	3.11727	0.036809
-3.89865	-3.89865	-3.89865	-3.89865	-3.89865	-3.89865	-3.89865	-6.18921	-6.18921	-6.18921	-6.18921	-6.18921	-2.24607	-2.24607	-2.97006	-2.97006	-2.97006	-2.97006	-2.97006
-0.698701	-0.435341	-0.435341	0.195913	0.691018	0.0762234	1.6047	1.6047	1.6047	1.6047	1.6047	1.6047	2.58847	2.58847	2.58847	2.58847	2.58847	3.32187	3.32187
-1.13498	2.46282	-0.535529	-0.535529	0.591685	0.928752	1.06568	1.06568	1.60629	1.02129	0.290272	0.558144	0.558144	0.427086	0.427086	-1.14242	-1.14242	-1.55019	-2.47886
3.15185	3.15185	1.37269	1.37269	1.73252	1.73252	0.274758	0.274758	0.274758	-0.610263	-0.719987	-0.357348	7.67718	4.35512	4.35512	4.35512	4.35512	4.30766	3.39928
-6.71374	-6.71374	-1.95464	-2.01583	-1.27143	-1.27143	-1.27143	-1.09321	-1.06844	-1.06844	-0.314973	-6.66897	-12.2635	-9.77384	-8.83757	-10.2484	-9.62376	-9.01854	-8.39788
2.79815	2.61691	2.32643	2.4253	0.501418	0.924098	0.865372	2.00248	1.84479	2.43304	2.27546	2.06764	2.66063	1.04916	1.90587	2.623	3.42881	4.95583	3.77949
-6.96017	-6.96017	-7.07909	-7.07909	-7.39955	-7.77986	-8.74398	-0.711682	-0.711682	-0.711682	-0.711682	-0.711682	-1.54709	0.650473	-0.873357	-1.12222	-1.12222	-1.12222	-1.12222
-10.4611	-7.01929	-7.01929	-7.01929	-7.01929	-0.915397	-0.915397	-0.915397	-0.915397	-0.121866	-0.121866	-0.121866	0.986752	0.986752	-0.935447	-3.26228	-2.27856	-2.27856	-0.777687
7.5949	0.740252	0.0565048	-0.463797	-0.463797	-0.463797	-0.339657	0.112268	0.112268	0.112268	-0.147018	-0.147018	1.55029	0.618824	0.618824	2.7118	2.7118	2.7118	2.7118
3.16428	3.16428	8.24947	8.24947	8.24947	8.24947	8.24947	8.24947	8.24947	0.560662	0.560662	0.560662	0.560662	0.560662	-0.00224662	-0.00224662	-3.10739	-3.10739	-3.10739
-1.11801	-1.11801	-1.11801	-1.11801	-0.378388	-0.378388	-0.378388	-0.378388	-0.378388	-0.378388	-0.378388	-0.378388	1.2131	1.2131	1.2131	1.2131	1.2131	0.812071	0.812071
-2.61981	-2.61981	-2.61981	-2.61981	-2.61981	-2.61981	-4.65839	-2.34087	-2.34087	-2.34087	-2.34087	-2.34087	-2.34087	-2.34087	-2.43552	-2.43552	-2.43552	-2.52113	-2.52113
4.99944	4.99944	4.99944	4.99944	4.99944	4.99944	4.99944	4.99944	4.99944	4.99944	4.99944	4.99944	4.99944	4.99944	4.99944	4.99944	4.99944	4.99944	4.99944
4.99944	4.99944	4.99944	4.99944	4.99944	4.99944	4.99944	4.99944	4.99944	4.99944	4.99944	4.99944	4.99944	4.99944	4.99944	4.99944	4.99944	4.99944	4.99944
0	0	0	0	0	0	0	0	0	0	0	0	0	0	0	0	0	0	0
0	0	0	0	0	0	0	0	0	0	0	0	0	0	0	0	0	0	0
	QQR	QR
0.05	6.80597	-0.0750166
0.1	1.16038	0.0105696
0.15	6.13174	0.0122983
0.2	-4.08311	0.0539161
0.25	1.50569	0.011845
0.3	0.130683	0.0671997
0.35	2.33976	0.0589917
0.4	-5.24157	0.0488273
0.45	2.28862	0.0489636
0.5	-3.25364	0.0111311
0.55	-2.63813	-0.026421
0.6	1.07045	-0.0156263
0.65	3.02902	-0.0394058
0.7	0.010027	-0.096687
0.75	-2.58485	-0.0878192
0.8	4.99944	-0.109827
0.85	4.99944	-0.116381
0.9	0	0.0186525
0.95	0	0.076205

## Sheet: CGD
-7.35044	2.561	4.98719	16.8121	12.3861	8.73451	8.59208	7.15876	8.52426	7.06738	10.7971	14.389	-1.4905	-3.39762	-5.59552	-14.0493	-12.6825	-10.6126	-6.63103
-7.35044	2.561	4.98719	16.8121	12.3861	8.73451	8.59208	10.5904	8.52426	7.06738	10.7971	14.389	8.52211	-3.39762	-5.59552	-10.4249	-12.6825	-10.6126	-6.63103
-7.35044	2.561	4.98719	16.8121	12.3861	8.73451	8.59208	10.5904	8.52426	7.06738	10.7971	14.389	8.52211	-3.39762	-5.59552	-10.4249	-12.6825	-10.6126	-6.63103
-7.35044	2.561	4.98719	16.8121	12.3861	8.73451	8.59208	10.5904	8.52426	7.06738	10.7971	14.389	9.51069	-3.39762	-5.59552	-10.4249	-12.6825	-10.6126	-6.63103
-7.35044	2.561	4.98719	16.8121	12.3861	8.73451	8.59208	10.5904	8.52426	7.06738	10.7971	14.389	9.51069	-0.0817767	-5.59552	-10.4249	-12.6825	-10.6126	-6.63103
-7.35044	2.561	4.98719	16.8121	12.3861	8.73451	8.63007	10.5904	8.52426	12.0789	10.7971	14.389	9.51069	1.05627	-5.59552	-10.4249	-12.6825	-10.6126	-6.63103
-7.35044	2.561	4.98719	16.8121	12.3861	8.73451	8.63007	10.5904	8.52426	12.5748	12.1099	14.389	9.51069	1.05627	-5.54336	-10.4249	-12.6825	-10.6126	-6.63103
-7.35044	2.561	4.98719	16.8121	12.3861	8.73451	8.63007	10.5904	8.52426	12.5748	12.1099	14.389	9.51069	4.27156	-5.54336	-10.4249	-12.6825	-9.30544	-6.63103
-7.35044	2.561	9.69665	16.8121	12.3861	8.73451	8.63007	10.5904	8.98614	12.5748	12.5395	14.389	9.51069	4.27156	-5.54336	-10.4249	-12.6825	-9.30544	-6.63103
-7.35044	2.561	9.69665	16.8121	12.3861	8.73451	8.63007	10.5904	8.98614	12.5748	12.5395	14.389	9.51069	4.27156	-4.65487	-9.98863	-12.6825	-9.30544	-6.63103
-7.35044	2.561	9.69665	16.8121	12.3861	8.73451	8.63007	10.5904	8.98614	12.5748	12.5395	14.389	9.82978	4.27156	-2.80449	-9.98863	-12.6825	-9.30544	-6.63103
-7.35044	2.561	9.69665	16.8121	12.3861	8.73451	8.63007	10.5904	8.98614	12.5748	12.5395	14.389	9.82978	4.27156	-2.80449	-9.98863	-12.6825	-9.30544	-6.63103
-7.35044	2.561	9.69665	16.8121	12.3861	8.73451	8.63007	10.5904	8.98614	12.5748	12.5395	14.389	12.1519	4.27156	-2.80449	-9.98863	-12.6825	-9.30544	-6.63103
-7.35044	2.561	9.69665	16.8121	12.3861	8.73451	8.63007	10.5904	8.98614	12.5748	12.5395	14.389	12.1519	4.27156	-2.80449	-9.98863	-5.69329	-4.98794	-6.63103
-7.35044	2.561	9.69665	16.8121	12.3861	8.73451	8.63007	10.5904	8.98614	12.5748	12.5395	14.389	12.1519	4.27156	-2.80449	-9.98863	-0.414611	-4.98794	-6.63103
-7.35044	2.561	9.69665	16.8121	12.3861	10.4902	8.63007	10.5904	8.98614	12.5748	12.5395	14.389	12.1519	8.07008	-2.80449	-9.98863	-0.414611	-4.98794	-6.63103
-7.35044	2.561	9.69665	16.8121	12.3861	10.4902	8.63007	10.5904	8.98614	12.5748	13.2963	14.389	12.1519	8.07008	-2.80449	-9.98863	-0.414611	-4.98794	-6.63103
-7.35044	2.561	9.69665	16.8121	12.3861	10.4902	8.63007	10.5904	8.98614	12.5748	13.2963	14.389	12.1519	8.07008	-2.10069	3.94034	-0.414611	-3.14488	-6.63103
-7.35044	2.561	9.69665	16.8121	12.3861	10.4902	8.63007	10.5904	8.98614	16.6406	15.8525	14.389	12.1519	8.07008	-2.10069	3.94034	-0.414611	-3.14488	-6.63103
	QQR	QR
0.05	2.11578	-7.35044
0.1	3.01413	2.561
0.15	3.01413	9.69665
0.2	3.06616	16.8121
0.25	3.24068	12.3861
0.3	3.56634	8.73451
0.35	3.66428	8.59208
0.4	3.90231	7.15876
0.45	4.19709	8.52426
0.5	4.26682	12.5748
0.55	4.381	12.1099
0.6	4.381	14.389
0.65	4.50322	9.51069
0.7	5.09831	3.59073
0.75	5.37614	-5.59552
0.8	5.66847	-10.4249
0.85	5.7083	-12.6825
0.9	6.57544	-9.30544
0.95	6.92397	-6.63103

## Sheet: OGAP
-4.9195	-3.28533	-2.73854	0.650091	0.636703	0.308078	-0.282643	-0.892222	-0.0834482	-0.184595	0.246327	0.521764	-0.417192	0.00158378	-2.84002	-2.97938	-3.76803	-3.78109	-6.3217
-4.9195	-3.28533	-2.73854	0.650091	0.636703	0.308078	-0.17833	-0.892222	-0.0834482	-0.184595	0.246327	0.521764	-0.417192	0.00158378	-2.84002	-2.97938	-3.76803	-3.78109	-6.3217
-4.9195	-3.28533	-2.33927	0.650091	0.636703	0.308078	-0.17833	-0.892222	-0.0834482	-0.184595	0.246327	0.563244	-0.417192	0.00158378	-2.84002	-2.97938	-3.76803	-3.78109	-3.91014
-4.9195	-3.28533	-2.33927	0.650091	0.636703	0.308078	-0.17833	-0.733151	-0.00747349	-0.184595	0.349298	0.563244	-0.417192	0.00158378	-2.72379	-2.97938	-3.76803	-3.78109	-2.94402
-4.9195	-3.28533	-1.76	0.650091	0.636703	0.308078	-0.17833	-0.733151	-0.00747349	-0.166173	0.359696	0.563244	-0.19987	0.00158378	-2.72379	-2.97938	-3.76803	-3.78109	-2.94402
-4.9195	-1.20798	-1.76	0.650091	0.910065	0.308078	-0.17833	-0.733151	-0.00747349	-0.166173	0.359696	0.563244	-0.19987	0.00158378	-2.72379	-2.97938	-3.76803	-3.78109	-2.94402
-3.33109	-1.20798	-1.17963	0.650091	0.910065	0.308078	-0.17833	-0.098796	-0.00747349	-0.166173	0.359696	0.563244	-0.19987	0.00158378	-2.72379	-3.03261	-3.76803	-3.78109	-2.94402
-3.33109	-1.20798	-1.17963	0.650091	0.910065	0.308078	-0.17833	-0.098796	-0.00747349	0.153741	0.359696	0.563244	0.329339	0.00158378	-2.72379	-3.03261	-3.76803	-3.78109	-2.94402
-3.33109	-0.811584	-1.17963	0.650091	0.910065	0.385314	-0.17833	-0.098796	-0.00747349	0.153741	0.359696	0.563244	0.329339	0.00158378	-2.72379	-3.03261	-3.76803	-3.78109	-2.94402
-3.33109	-0.777336	-1.17963	0.650091	0.910065	0.385314	0.606568	-0.098796	0.0818362	0.153741	0.359696	0.563244	0.329339	0.00158378	-2.72379	-3.03261	-3.76803	-3.78109	-2.94402
-3.33109	-0.777336	-0.529473	0.650091	0.910065	0.385314	0.606568	0.0545097	0.0818362	0.153741	0.359696	0.563244	0.329339	0.00158378	-0.957173	-3.03261	-3.76803	-3.78109	-2.94402
-3.33109	-0.777336	-0.529473	0.650091	0.910065	0.385314	0.606568	0.496914	0.0818362	0.153741	0.359696	0.563244	0.329339	0.00158378	-0.957173	-3.09364	-3.76803	-3.78109	-2.94402
-3.33109	-0.777336	-0.529473	0.978129	0.910065	0.385314	0.606568	0.496914	0.363227	0.432167	0.359696	0.563244	0.329339	0.00158378	-0.957173	-3.09364	-3.76803	-2.9125	-2.94402
-3.33109	-0.777336	0.162763	0.978129	0.910065	0.576114	0.606568	0.496914	0.363227	0.432167	0.359696	0.563244	0.329339	0.00158378	-0.706679	-3.09364	-3.76803	-2.9125	-2.94402
-3.33109	-0.777336	0.162763	0.978129	1.61612	0.576114	0.606568	0.508708	0.363227	0.432167	0.359696	0.563244	0.329339	0.00158378	-0.706679	-3.09364	-3.76803	-2.22999	-2.94402
-3.33109	-0.777336	0.162763	1.56894	1.61612	0.576114	0.606568	0.508708	0.363227	0.432167	0.359696	0.563244	0.329339	0.00158378	-0.706679	-3.09364	-3.76803	-2.22999	-2.94402
-3.33109	-0.777336	0.772728	1.56894	1.61612	0.576114	0.606568	0.508708	0.363227	0.432167	0.359696	0.563244	0.329339	0.00158378	-0.706679	-3.09364	-3.76803	-2.22999	-2.94402
-3.33109	-0.777336	0.772728	1.56894	1.61612	0.576114	0.606568	0.508708	0.63974	0.432167	0.359696	0.563244	0.329339	-0.0808155	-0.706679	-3.09364	-3.76803	-2.22999	-2.94402
-3.33109	-0.642084	0.772728	1.56894	1.61612	0.576114	0.606568	0.508708	0.63974	0.432167	0.359696	0.405074	0.329339	-0.0808155	-0.706679	-3.09364	-3.76803	-2.22999	-2.94402
	QQR	QR
0.05	-1.58574	-4.9195
0.1	-1.58025	-0.811584
0.15	-1.43013	-0.913684
0.2	-1.35538	0.650091
0.25	-1.31193	0.910065
0.3	-1.18821	0.385314
0.35	-1.04348	0.127525
0.4	-0.99879	-0.098796
0.45	-0.973862	-0.00747349
0.5	-0.926048	0.153741
0.55	-0.790781	0.349298
0.6	-0.770708	0.521764
0.65	-0.678264	-0.19987
0.7	-0.618605	-0.0808155
0.75	-0.544901	-2.72379
0.8	-0.513806	-3.03261
0.85	-0.481703	-3.76803
0.9	-0.471486	-3.78109
0.95	-0.472692	-2.94402
