# Supplementary material for: Macroeconomic Imbalances and Financial Stress Among BRICS: Analysis of Frequency-Dependent and Asymmetric Causal Nexuses
Source: publisher site journal article supplement (doi:10.1515/snde-2024-0045), 2025-04-16
Supplement: Supplementary file 64 [file IMF2.xlsx]

## Sheet: CA
0	0	0	0	0	0	0	0	0	0	0	0	0	0	0	0	0	0	0
0.280869	0.280869	0.280869	0.280869	0.280869	0.280869	0.280869	0.280869	0.280869	0.280869	0.280869	0.280869	0.280869	0.280869	0.280869	0.280869	0.280869	0.280869	0.280869
-5.16397	-5.16397	-5.16397	-5.16397	-5.16397	-5.16397	-5.16397	-5.16397	-5.16397	7.43634	7.43634	7.43634	7.43634	7.43634	7.43634	7.43634	7.43634	7.43634	7.43634
1.21942	1.21942	1.21942	1.21942	1.21942	1.21942	1.21942	1.21942	1.21942	1.21942	1.21942	1.21942	1.21942	1.21942	1.67827	1.67827	1.67827	1.67827	1.67827
-1.74775	-1.74775	-1.74775	-1.74775	-1.74775	-1.74775	-1.74775	-1.74775	-1.74775	-2.28513	-2.28513	-2.28513	-2.28513	-2.28513	-2.28513	-2.28513	-2.28513	-2.28513	0.97276
-1.74597	-1.74597	-1.74597	-1.74597	-1.74597	-9.70215	-9.70215	-9.70215	-9.70215	-9.70215	-9.70215	-9.70215	-9.70215	-9.70215	-9.70215	-9.70215	-9.70215	-9.70215	-1.92467
2.4385	2.4385	2.4385	2.4385	2.4385	2.4385	2.4385	2.4385	0.60108	0.60108	0.60108	0.60108	0.60108	0.60108	0.60108	0.60108	0.60108	0.60108	0.60108
-1.73198	-1.73198	-1.73198	-1.73198	-1.73198	-1.73198	-1.73198	-1.73198	-1.73198	-1.73198	-1.73198	-1.73198	-1.73198	-1.73198	-1.73198	-1.73198	-1.73198	-1.73198	-1.73198
-1.23305	-1.23305	-1.23305	-1.23305	-1.23305	1.00469	1.00469	1.00469	1.00469	1.00469	1.00469	1.00469	1.00469	1.00469	1.00469	1.00469	1.00469	1.00469	1.00469
-3.31197	-3.31197	-3.31197	-3.31197	-3.31197	-3.31197	-2.94595	-2.94595	-4.7173	-4.7173	-4.7173	-4.7173	-4.37826	-4.37826	-4.37826	-4.37826	-4.37826	-4.37826	-4.37826
5.27875	5.27875	5.27875	5.27875	5.27875	5.27875	5.27875	5.27875	5.27875	5.27875	5.27875	5.27875	5.27875	5.27875	5.27875	5.27875	5.27875	5.27875	1.76847
0.0710213	-0.715512	-0.715512	-0.715512	-0.715512	-0.715512	-0.715512	-0.715512	-0.715512	-0.715512	-0.715512	-0.715512	-0.715512	-0.715512	-0.715512	-0.715512	-0.715512	-0.715512	-0.715512
-4.21448	-4.21448	-4.21448	-4.21448	-4.21448	-2.4418	-2.4418	-2.4418	-3.80754	-3.80754	-3.6194	-3.6194	-3.6194	-3.6194	-3.6194	-2.87661	-2.87661	-2.87661	-2.87661
0.166168	0.166168	0.166168	0.0469724	-0.573647	0.854754	-0.0172639	-7.93368	-7.93368	-7.93368	-7.93368	-7.93368	-6.72626	-6.72626	-6.72626	-6.72626	-6.72626	-6.72626	-6.72626
-0.339228	-0.339228	-0.339228	-0.339228	-0.339228	-0.339228	-0.339228	-0.339228	-0.339228	-0.339228	-0.339228	1.10838	1.10838	1.10838	0.220395	0.220395	0.220395	0.220395	0.887809
12.4973	12.4973	12.4973	12.4973	12.4973	12.4973	12.4973	12.4973	7.51551	7.51551	7.51551	7.51551	7.51551	7.51551	7.51551	7.51551	7.51551	7.51551	7.51551
-0.630123	-0.630123	-0.630123	-0.630123	-0.630123	-0.630123	-0.630123	-0.630123	-0.630123	-0.630123	-0.630123	-0.630123	-0.630123	-0.630123	-0.630123	-0.630123	-0.630123	-0.630123	-0.630123
0.920611	0.920611	0.920611	0.920611	0.920611	0.920611	0.920611	0.920611	0.920611	0.920611	0.920611	0.920611	0.920611	0.920611	0.920611	0.920611	0.920611	0.920611	1.83521
4.78896	4.78896	4.78896	4.78896	4.78896	4.78896	4.78896	4.78896	4.78896	9.35233	9.35233	9.35233	9.35233	9.35233	9.35233	9.35233	9.35233	9.35233	9.35233
	QQR	QR
0.05	0	0.228532
0.1	0.280869	0.297179
0.15	1.46777	0.205296
0.2	1.34017	0.215505
0.25	-1.85911	0.226041
0.3	-7.19908	0.244539
0.35	1.37473	0.248513
0.4	-1.73198	0.198478
0.45	0.415814	0.212367
0.5	-3.96214	0.198108
0.55	5.094	0.15707
0.6	-0.674115	0.166332
0.65	-3.45349	0.223674
0.7	-4.52331	0.204191
0.75	0.0717385	0.196274
0.8	9.61309	0.162691
0.85	-0.630123	0.18704
0.9	0.968748	0.252182
0.95	7.19074	0.281442

## Sheet: CGD
13.7046	17.7062	11.7161	14.7819	15.5477	14.7773	12.1573	3.7823	-0.495684	4.84256	3.39718	1.28799	0.530971	1.39862	-2.80737	-7.57211	-11.2512	-11.2718	-14.6013
13.7046	17.7062	11.7161	14.7819	15.5477	14.7773	12.1573	3.7823	-0.495684	4.84256	3.39718	1.28799	0.530971	1.39862	-2.80737	-7.57211	-11.2512	-11.2718	-14.6013
13.7046	17.7062	11.7161	14.7819	15.5477	14.7773	12.1573	3.7823	-0.495684	4.84256	3.39718	1.28799	0.530971	1.39862	-2.80737	-7.57211	-11.2512	-11.2718	-14.6013
13.7046	17.7062	11.7161	14.7819	15.5477	14.7773	12.1573	3.7823	-0.495684	4.84256	3.39718	1.28799	0.530971	1.39862	-2.80737	-7.57211	-11.2512	-11.2718	-14.6013
13.7046	17.7062	11.7161	14.7819	15.5477	14.7773	12.1573	3.7823	-0.495684	4.84256	3.39718	1.28799	0.530971	1.39862	-2.80737	-7.57211	-11.2512	-11.2718	-14.6013
13.7046	17.7062	11.6038	14.7819	15.5477	14.7773	12.1573	3.7823	-0.495684	4.84256	3.39718	1.28799	0.530971	1.39862	-2.80737	-7.57211	-11.2512	-8.12267	-14.6013
13.7046	17.7062	11.6038	14.7819	15.5477	14.7773	12.1573	3.7823	-0.495684	4.84256	3.39718	1.28799	0.530971	1.39862	-2.80737	-7.57211	-11.2512	-8.12267	-14.6013
13.7046	17.7062	11.6038	14.7819	15.5477	14.7773	12.1573	3.7823	-0.495684	4.84256	3.39718	1.28799	0.530971	1.39862	-2.80737	-7.57211	-11.2512	-8.12267	-14.6013
13.7046	17.7062	11.6038	14.7819	15.5477	14.7773	12.1573	3.7823	-0.495684	4.84256	3.39718	1.28799	0.530971	1.39862	-2.80737	-6.7146	-11.2512	-8.12267	-14.6013
13.7046	17.7062	11.6038	14.7819	15.5477	-0.618913	12.1573	3.7823	-0.495684	4.84256	3.39718	1.28799	0.530971	1.39862	-2.80737	-6.7146	-11.2512	-8.12267	-14.6013
13.7046	17.7062	11.6038	14.7819	15.5477	-0.618913	12.1573	3.7823	-0.495684	4.84256	3.39718	1.28799	0.530971	1.39862	-2.80737	-6.7146	-11.2512	-8.12267	-14.6013
13.7046	17.7062	11.6038	14.7819	15.5477	-0.618913	12.1573	3.7823	-0.495684	4.84256	3.39718	1.28799	0.530971	1.39862	-2.49006	-6.7146	-11.2512	-8.12267	-14.6013
13.7046	17.7062	11.6038	6.85339	15.5477	-0.618913	12.1573	3.7823	-0.495684	4.84256	3.39718	1.28799	0.530971	1.39862	-2.49006	-6.7146	-11.2512	-8.12267	-13.8049
13.7046	17.7062	11.6038	6.85339	15.5477	-1.73196	12.1573	3.7823	-0.495684	4.84256	3.39718	1.28799	0.530971	1.39862	-2.49006	-6.7146	-11.2512	-8.12267	-13.8049
13.7046	17.7062	11.6038	6.85339	15.5477	-1.73196	12.1573	3.7823	-0.495684	4.84256	3.39718	1.28799	0.530971	1.39862	-2.49006	-6.7146	-11.2512	-8.12267	-13.8049
13.7046	17.7062	11.5306	6.85339	15.5477	-1.73196	12.1573	3.7823	-0.495684	4.84256	3.39718	1.28799	0.530971	1.39862	-2.49006	-6.7146	-11.2512	-8.12267	-13.8049
13.7046	17.7062	11.5306	6.85339	15.5477	-1.73196	12.1573	3.7823	-0.495684	4.84256	3.39718	1.28799	0.530971	1.39862	-2.49006	-6.7146	-11.2512	-8.12267	-13.8049
13.7046	17.7062	11.5306	6.85339	7.13241	-1.73196	12.1573	3.7823	-0.495684	4.84256	3.39718	1.28799	0.530971	1.39862	-2.49006	-6.7146	-9.94052	-8.12267	-13.8049
13.7046	17.7062	11.5306	6.85339	7.13241	-1.73196	12.1573	3.7823	-0.495684	4.84256	3.39718	1.28799	0.72555	1.39862	-2.49006	-6.7146	-9.94052	-8.12267	-13.8049
	QQR	QR
0.05	3.55954	13.7046
0.1	3.55954	17.7062
0.15	3.55954	11.6038
0.2	3.55954	14.7819
0.25	3.55954	15.5477
0.3	3.71937	14.7773
0.35	3.71937	12.1573
0.4	3.71937	3.7823
0.45	3.7645	-0.495684
0.5	2.95418	4.84256
0.55	2.95418	3.39718
0.6	2.97088	1.28799
0.65	2.5955	0.530971
0.7	2.53692	1.39862
0.75	2.53692	-2.49006
0.8	2.53306	-6.7146
0.85	2.53306	-11.2512
0.9	2.15914	-8.12267
0.95	2.16938	-14.6013

## Sheet: OGAP
23.9761	29.6379	24.6874	26.5941	19.9726	14.8995	16.6285	20.1557	21.7203	21.9573	24.7602	9.94349	12.4303	14.7141	21.5097	28.8364	24.1099	18.8624	19.2608
23.9761	29.6379	24.6874	26.5941	19.9726	14.8995	16.6285	20.1557	21.7203	21.9573	24.7602	9.94349	12.4303	14.7141	21.5097	28.8364	24.1099	18.8624	19.2608
23.9761	29.6379	24.6874	26.5941	19.9726	14.8995	16.6285	20.1557	21.7203	21.9573	24.7602	9.94349	12.4303	14.7141	21.5097	28.8364	24.1099	18.8624	19.2608
23.9761	29.6379	24.6874	26.5941	19.9726	14.8995	16.6285	20.1557	21.7203	21.9573	24.7602	9.94349	12.4303	15.9284	21.5097	28.8364	24.1099	18.8624	19.2608
23.9761	29.6379	24.6874	26.5941	19.9726	14.8995	19.5261	20.1557	21.7203	21.9573	24.7602	9.94349	12.4303	15.9284	21.5097	28.8364	24.1099	18.8624	19.2608
23.9761	29.6379	24.6874	26.5941	19.9726	14.8995	19.5261	20.1557	21.7203	21.9573	24.7602	9.94349	12.4303	15.9284	21.5097	28.8364	24.1099	18.8624	19.2608
23.9761	29.6379	24.6874	26.5941	19.9726	14.8995	19.5261	20.1557	21.7203	21.9573	24.7602	9.94349	12.4303	15.9284	21.5097	28.8364	24.1099	18.8624	19.2608
23.9761	29.6379	24.6874	26.5941	19.9726	14.8995	19.5261	20.1557	21.7203	21.9573	24.7602	9.94349	12.4303	15.9284	21.5097	28.8364	24.1099	18.8624	19.2608
23.9761	29.6379	24.6874	26.5941	19.9726	14.8995	19.5261	20.1557	21.7203	21.9573	24.7602	9.94349	12.4303	16.1799	21.5097	28.8364	24.1099	18.8624	19.2608
23.9761	29.6379	24.6874	26.5941	19.9726	14.8995	19.5261	20.1557	21.7203	21.9573	24.7602	9.94349	12.4303	16.1799	21.5097	28.8364	24.1099	18.8624	19.2608
23.9761	29.6379	24.6874	26.5941	19.9726	14.8995	19.5261	20.1557	21.7203	21.9573	24.7602	9.94349	12.4303	16.1799	21.5097	28.8364	24.1099	18.8624	19.2608
26.146	29.6379	24.6874	26.5941	19.9726	14.8995	19.5261	20.1557	21.7203	21.9573	24.7602	9.94349	12.4303	16.1799	21.5097	28.8364	24.1099	18.8624	19.2608
26.146	29.6379	24.6874	26.5941	19.9726	14.8995	19.5261	20.1557	21.7203	21.9573	24.7602	9.94349	12.4303	16.1799	21.5097	28.8364	24.1099	18.8624	19.2608
26.146	29.6379	24.6874	26.5941	19.9726	14.8995	19.5261	20.1557	21.7203	21.9573	24.7602	9.94349	12.4303	16.1799	21.5097	28.8364	24.1099	18.8624	19.2608
26.146	29.6379	24.6874	26.5941	19.9726	17.0835	19.5261	20.1557	21.7203	21.9573	24.7602	9.94349	12.4303	16.1799	21.5097	28.8364	24.1099	18.8624	19.2608
26.146	29.6379	24.6874	26.5941	19.9726	17.0835	19.5261	20.1557	21.7203	21.9573	24.7602	9.94349	12.4303	16.1799	21.5097	28.8364	24.1099	18.8624	19.2608
26.146	29.6379	24.6874	26.5941	19.9726	17.0835	19.5261	20.1557	21.7203	21.9573	24.7602	9.94349	12.4303	16.1799	21.5097	28.8364	24.1099	18.8624	19.2608
26.146	29.6379	24.6874	26.5941	19.9726	17.0835	19.5261	20.1557	21.7203	21.9573	24.7602	9.94349	12.4303	16.1799	21.5097	28.8364	24.1099	18.8624	19.2608
26.146	29.6379	24.6874	26.5941	19.9726	17.0835	19.5261	20.1557	21.7203	21.9573	24.7602	9.94349	12.4303	16.1799	21.5097	28.8364	24.1099	18.8624	19.2608
	QQR	QR
0.05	20.7714	23.9761
0.1	20.7714	29.6379
0.15	20.7714	24.6874
0.2	20.8353	26.5941
0.25	20.9878	19.9726
0.3	20.9878	14.8995
0.35	20.9878	19.5261
0.4	20.9878	20.1557
0.45	21.0011	21.7203
0.5	21.0011	21.9573
0.55	21.0011	24.7602
0.6	21.1153	9.94349
0.65	21.1153	12.4303
0.7	21.1153	16.1799
0.75	21.2302	21.5097
0.8	21.2302	28.8364
0.85	21.2302	24.1099
0.9	21.2302	18.8624
0.95	21.2302	19.2608
