# Supplementary material for: Macroeconomic Imbalances and Financial Stress Among BRICS: Analysis of Frequency-Dependent and Asymmetric Causal Nexuses
Source: publisher site journal article supplement (doi:10.1515/snde-2024-0045), 2025-04-16
Supplement: Supplementary file 65 [file IMF3.xlsx]

## Sheet: CA
7.61883	7.61883	7.61883	7.61883	7.61883	7.61883	31.0042	31.0042	31.0042	31.0042	31.0042	31.0042	31.952	31.952	31.952	31.952	31.952	31.952	31.952
-2.67841	-1.28504	-1.28504	-1.28504	-1.28504	-1.28504	-1.28504	-1.28504	-1.28504	-1.28504	-1.28504	-1.28504	-1.28504	-1.28504	-0.239561	-0.239561	-0.239561	-0.239561	-0.239561
2.74267	2.74267	2.74267	2.74267	-2.90872	-2.70207	-2.70207	-2.70207	1.30174	1.30174	1.30174	1.6382	2.21376	0.615155	2.30347	2.27677	1.95913	2.0555	2.0555
-4.76283	-4.50246	0.608164	0.608164	1.35495	1.35495	-0.254705	-0.806714	-0.806714	-0.806714	-0.806714	-0.806714	-0.806714	-0.806714	-0.806714	-0.806714	-0.806714	-0.806714	-0.806714
2.69584	0.762323	1.3443	1.3443	1.3443	1.3443	0.322581	0.221465	0.221465	-0.142732	-0.142732	-0.142732	0.0462791	0.0462791	0.0462791	0.0462791	0.0462791	-1.29929	-1.29929
-2.67302	-3.19092	-3.19092	-3.19092	-3.19092	-3.19092	-3.19092	-3.19092	-5.11417	-2.7977	-2.7977	0.0854147	0.60678	0.60678	0.60678	-1.66155	-1.66155	4.0011	4.0011
2.112	2.112	2.112	2.112	2.112	4.9701	4.9701	5.43283	5.43283	5.43283	5.43283	5.43283	5.43283	3.53364	3.53364	3.53364	3.68692	3.07865	-0.817958
-3.34028	-3.41323	-3.74974	-3.74974	-0.880444	-0.880444	-0.880444	-0.880444	-0.880444	-0.880444	-0.86339	-0.86339	-0.86339	-0.796079	-0.796079	-0.796079	-0.796079	-0.796079	-0.796079
3.0044	3.0044	3.0044	3.0044	4.0875	-0.704948	-0.393309	-0.393309	-0.393309	-0.393309	-0.393309	-0.393309	-0.553295	-1.16251	-1.16251	-0.688843	-0.613047	4.4537	4.4537
-1.70555	-1.70555	-2.10298	-3.99902	-3.99902	-3.99902	-3.99902	-0.0814597	1.50146	1.50146	1.50146	0.791745	0.791745	0.791745	0.791745	3.0998	3.0998	1.80495	-0.640312
-3.91831	-3.91831	-3.91831	-0.575832	-0.575832	-0.575832	-0.575832	0.281231	0.281231	0.281231	0.202943	0.202943	0.202943	0.202943	0.202943	0.202943	0.202943	0.202943	0.202943
3.92974	3.92974	3.42092	0.246482	0.246482	-0.355541	-0.480569	0.677046	0.82538	0.82538	0.82538	0.82538	0.82538	0.82538	0.82538	0.82538	0.82538	0.82538	0.723779
0.19517	0.19517	0.19517	0.19517	0.19517	0.19517	0.19517	-2.17136	-2.17136	-2.17136	-2.17136	-2.17136	-2.17136	-5.80737	-5.80737	-5.80737	-5.80737	-5.80737	-4.46244
1.75092	1.75092	1.75092	1.75092	2.0827	2.0827	2.0827	2.0827	5.71606	5.71606	5.71606	5.71606	5.71606	8.76691	8.76691	8.76691	7.97859	7.97859	7.97859
-1.87702	-1.87702	-0.663521	-0.919301	-3.017	-3.017	-3.017	-3.017	-2.12302	-2.12302	-2.12302	-1.27163	-1.27163	-7.42561	-2.23456	-2.23456	-0.562508	-0.562508	0.156506
0.166239	0.166239	-0.15099	-0.549067	-0.549067	-0.549067	-8.2176	-8.2176	-8.2176	-8.2176	-10.9175	-10.9175	-10.9175	-10.9175	-10.9175	-14.0267	-14.0267	-14.0267	-14.0267
-2.44572	-2.44572	-2.44572	-2.44572	-2.44572	-1.05878	-1.05878	-1.05878	2.09836	2.09836	2.09836	3.49051	3.49051	3.49051	3.49051	3.49051	3.49051	3.49051	3.49051
0.336228	-0.525884	-0.525884	-0.525884	-0.525884	-0.525884	-9.40203	-9.40203	-9.40203	-2.66958	-2.66958	-2.66958	-2.66958	-2.66958	-2.66958	-2.66958	-2.66958	-2.66958	-2.66958
2.88218	2.88218	2.88218	2.88218	2.88218	2.88218	2.88218	2.88218	2.88218	2.88218	2.88218	2.88218	2.88218	2.88218	2.88218	2.88218	2.88218	2.88218	2.88218
	QQR	QR
0.05	23.9685	0.167673
0.1	-1.08325	0.123999
0.15	0.998867	0.119503
0.2	-0.803913	0.093791
0.25	0.358184	0.101658
0.3	-1.53338	0.0410124
0.35	3.66556	0.0496373
0.4	-1.41591	0.0345735
0.45	0.935133	0.0238511
0.5	-0.345053	0.035249
0.55	-0.599373	0.0215302
0.6	1.08378	0.0306135
0.65	-2.37691	0.0182376
0.7	4.95533	0.0336555
0.75	-2.06213	0.0595143
0.8	-7.63318	0.0502134
0.85	0.990224	0.100907
0.9	-3.01027	0.120949
0.95	2.88218	0.120832

## Sheet: CGD
-7.38533	-4.89758	-3.46441	0.673517	1.87143	2.14121	1.46073	1.67589	1.66116	1.27452	0.566909	0.583448	-0.10738	-0.961093	-1.07438	-2.00173	-2.19663	3.8902	7.71677
-7.38533	-4.89758	-3.46441	0.673517	1.87143	2.14121	1.46073	1.67589	1.66116	1.27452	0.566909	0.583448	-0.10738	-0.869707	-1.07438	-2.00173	-2.7457	3.8902	7.71677
-7.38533	-4.89758	-3.46441	0.673517	2.08419	2.14121	1.46073	1.67589	1.66116	1.27452	0.566909	0.583448	-0.10738	-0.869707	-1.07438	-2.48932	-2.7457	0.295259	7.71677
-7.38533	-3.98607	-3.46441	1.31592	2.54091	2.14121	1.94459	1.67589	1.66116	1.27452	0.566909	0.583448	0.0683342	-0.869707	-1.07438	-2.48932	-2.97318	0.295259	7.71677
-0.935211	-3.98607	-2.73134	1.31592	2.54091	2.14121	1.94459	1.67589	1.66116	1.27452	0.653557	0.583448	0.0683342	-0.725788	-1.07438	-2.48932	-2.7457	0.295259	7.15862
-0.935211	-3.98607	-2.73134	1.31592	2.64704	2.14121	2.27963	1.75654	1.66116	1.33031	0.653557	0.583448	0.158035	-0.325836	-1.07438	-2.48932	-2.7457	0.295259	7.15862
1.6617	-3.98607	-2.73134	1.31592	2.64704	2.38898	2.27963	1.75654	1.66116	1.33031	0.653557	0.583448	0.158035	-0.325836	-1.07438	-2.48932	-2.19663	-1.28611	3.98443
1.6617	-3.98607	-2.46784	1.59271	2.64704	2.38898	2.27963	1.75654	1.66116	1.33031	0.991377	0.583448	0.247905	-0.318817	-1.07438	-2.00173	-2.19663	-1.28611	3.98443
5.34953	3.00383	-2.46784	1.72403	2.83935	2.38898	2.27963	1.85378	1.66116	1.37664	0.991377	0.583448	0.247905	-0.318817	-1.02521	-2.00173	-2.19663	-1.28611	3.98443
7.65422	6.4453	-1.28892	3.50974	2.83935	2.38898	2.27963	1.85378	1.66116	1.37664	0.991377	0.583448	0.434909	-0.318817	-0.612988	-1.83526	-2.19663	-1.28611	3.98443
10.8281	6.4453	5.49139	3.50974	2.8972	2.63718	2.69513	1.91168	1.66116	1.37664	1.28455	0.583448	0.57793	0.177793	-0.432577	-1.83526	-2.19663	-1.28611	1.8676
10.8281	9.11527	7.63445	4.38347	2.92603	2.63718	2.69513	2.3047	1.66116	1.64735	1.28455	0.583448	0.57793	0.339413	-0.432577	-1.83526	-2.19663	-4.5746	1.8676
10.8281	9.11527	7.63445	4.42512	3.14195	2.66155	2.78272	2.3047	1.86682	1.64735	1.3394	0.729282	0.596539	0.339413	-0.432577	-1.83526	-2.19663	-4.5746	1.8676
10.8281	9.11527	7.63445	4.42512	3.14195	2.66155	2.78272	2.40202	2.12381	1.64735	1.3394	0.878732	0.596539	0.339413	-0.432577	-1.67252	-2.19663	-4.5746	-0.22377
10.8281	9.11527	7.63445	4.44002	3.40325	3.17081	2.78272	2.40202	2.12381	1.9175	1.3394	0.878732	0.596539	0.339413	-0.405517	-1.67252	-2.19663	-4.5746	-0.22377
10.8281	9.11527	7.63445	4.44002	3.40325	3.17081	2.78272	2.40202	2.12381	1.9175	1.3394	0.878732	0.642136	0.339413	-0.060164	-1.58051	-2.19663	-4.5746	-0.22377
10.8281	9.11527	7.63445	4.44002	3.42765	3.17081	2.82966	2.40202	2.28832	2.08362	1.3394	0.878732	0.642136	0.339413	-0.060164	-1.58051	-2.19663	-4.5746	-0.22377
10.8281	9.11527	7.63445	4.44002	3.42765	3.17081	2.82966	2.40202	2.38165	2.08362	1.3394	0.878732	0.642136	0.768442	-0.060164	-1.07235	-2.19663	-4.5746	-9.15171
10.8281	9.11527	7.63445	4.44002	3.54669	3.17081	2.94886	2.40202	2.38165	2.08362	1.3394	0.878732	0.642136	0.768442	-0.060164	-0.852765	-2.19663	-4.5746	-9.15171
	QQR	QR
0.05	0.0751183	1.6617
0.1	0.0510297	-0.887741
0.15	-0.152643	-1.28892
0.2	-0.0240784	2.94157
0.25	0.348716	2.71056
0.3	0.404888	2.51811
0.35	0.333214	2.75393
0.4	0.410192	2.20705
0.45	0.999355	2.12381
0.5	1.49812	1.9175
0.55	2.01023	1.28455
0.6	2.18141	0.729282
0.65	2.22322	0.59033
0.7	2.14823	0.177793
0.75	2.20521	-0.612988
0.8	2.23063	-1.74987
0.85	2.25179	-2.19663
0.9	1.83613	-1.28611
0.95	1.86023	1.8676

## Sheet: OGAP
-8.17174	6.86686	7.47749	5.17536	4.14736	-0.0508393	0.559256	1.43839	1.51479	2.27531	2.5342	3.53948	2.97285	5.35242	8.88407	12.0261	13.9119	3.45196	30.1234
-8.17174	6.86686	7.47749	5.17536	4.14736	-0.0508393	0.559256	1.43839	1.51479	2.27531	2.5342	3.53948	2.97285	3.39825	8.88407	12.0261	13.9119	3.45196	23.0287
-8.17174	6.86686	7.47749	5.17536	4.14736	-0.0508393	0.559256	1.43839	1.51479	2.27531	2.5342	3.53948	2.97285	3.39825	8.88407	12.0261	13.9119	3.45196	23.0287
-8.17174	6.86686	7.47749	5.17536	4.14736	-0.0508393	0.559256	1.43839	1.51479	2.27531	2.5342	3.53948	2.97285	3.39825	8.57087	12.0261	13.9119	3.45196	23.0287
-8.17174	6.86686	7.47749	5.17536	4.14736	-0.0508393	0.559256	1.43839	1.51479	2.27531	2.5342	3.53948	2.97285	3.39825	8.57087	12.0261	13.9119	3.45196	23.0287
-8.17174	9.29852	7.47749	5.17536	4.14736	-0.0508393	0.559256	1.43839	1.51479	2.27531	2.5342	3.53948	2.97285	3.39825	8.57087	12.0261	13.9119	3.45196	8.29275
-8.17174	9.29852	7.47749	5.17536	4.14736	-0.0508393	0.559256	1.43839	1.51479	2.27531	2.5342	3.53948	2.97285	3.39825	8.57087	12.0261	13.9119	3.45196	8.29275
-8.17174	9.29852	7.47749	5.17536	4.14736	-0.0508393	0.559256	1.29235	1.51479	2.27531	2.5342	3.53948	2.97285	3.39825	8.57087	12.0261	13.9119	3.45196	8.29275
-8.17174	9.29852	7.47749	5.17536	4.14736	-0.0508393	0.559256	1.29235	1.51479	2.27531	2.5342	3.53948	2.97285	3.39825	8.57087	12.0261	13.9119	1.78611	8.29275
-8.17174	9.29852	7.47749	5.17536	4.14736	-0.0508393	0.559256	1.29235	1.51479	2.27531	2.5342	2.94175	2.69584	3.39825	8.57087	12.0261	13.9119	1.78611	8.29275
-8.17174	9.29852	7.47749	5.17536	4.14736	-0.0508393	0.559256	1.29235	1.51479	2.27531	2.5342	2.94175	2.69584	3.39825	6.62831	11.105	13.9119	1.78611	8.29275
-8.17174	9.29852	7.47749	5.17536	4.14736	-0.0508393	0.559256	1.29235	1.51479	2.27531	2.5342	2.94175	2.69584	3.28679	6.62831	11.105	13.9119	1.78611	8.29275
-8.17174	9.29852	7.47749	5.17536	4.14736	-0.0508393	0.559256	1.29235	1.51479	1.14478	2.5342	2.94175	2.69584	3.28679	6.62831	11.105	13.9119	1.78611	8.29275
-8.17174	9.29852	7.47749	5.17536	4.14736	-0.0508393	0.559256	1.29235	1.51479	1.14478	2.5342	2.94175	2.57402	3.28679	6.62831	11.105	13.9119	1.78611	8.29275
-8.17174	9.29852	7.47749	5.17536	4.14736	-0.0508393	0.559256	1.29235	1.51479	1.14478	2.5342	2.94175	2.57402	3.28679	6.62831	11.105	13.9119	1.78611	8.29275
-8.17174	9.29852	7.47749	5.17536	4.14736	-0.0508393	0.559256	1.29235	1.51479	1.14478	2.5342	2.88017	2.57402	3.28679	6.62831	11.105	13.2392	1.78611	8.29275
-8.17174	9.29852	7.47749	5.17536	4.14736	-0.0508393	0.559256	1.29235	1.51479	1.14478	2.5342	2.88017	2.57402	3.28679	6.62831	11.105	11.7696	1.78611	8.29275
-8.17174	9.29852	7.47749	5.17536	4.14736	-0.0508393	0.559256	1.29235	1.51479	1.14478	2.5342	2.88017	2.57402	3.28679	6.62831	11.105	11.7696	1.78611	8.29275
-8.17174	9.29852	7.47749	5.17536	4.14736	-0.0508393	0.559256	1.29235	1.51479	1.14478	2.5342	2.88017	2.42673	3.28679	6.62831	11.105	11.7696	1.78611	8.29275
	QQR	QR
0.05	5.47519	-8.17174
0.1	4.99894	9.29852
0.15	4.99894	7.47749
0.2	4.98245	5.17536
0.25	4.98245	4.14736
0.3	4.33486	-0.0508393
0.35	4.33486	0.559256
0.4	4.32717	1.43839
0.45	4.2395	1.51479
0.5	4.19346	2.27531
0.55	4.04274	2.5342
0.6	4.03687	3.53948
0.65	3.97737	2.97285
0.7	3.97096	3.39825
0.75	3.97096	6.62831
0.8	3.93231	11.6178
0.85	3.85496	13.9119
0.9	3.85496	1.78611
0.95	3.84721	8.29275
