# Supplementary material for: Macroeconomic Imbalances and Financial Stress Among BRICS: Analysis of Frequency-Dependent and Asymmetric Causal Nexuses
Source: publisher site journal article supplement (doi:10.1515/snde-2024-0045), 2025-04-16
Supplement: Supplementary file 66 [file IMF4.xlsx]

## Sheet: CA
-4.2882	-4.2882	-6.18228	-6.18228	-6.18228	-6.18228	-5.95844	-5.95844	-4.0636	5.1496	7.4174	10.5052	8.27514	8.27514	8.27514	11.322	8.73278	8.73278	8.73278
0.481854	0.481854	0.481854	0.481854	0.893191	0.893191	0.893191	0.501286	0.501286	0.501286	-2.38916	0.884206	0.44749	0.44749	0.44749	0.895166	0.895166	0.895166	0.895166
2.47298	2.47298	2.47298	2.47298	2.47298	2.47298	2.65933	2.65933	2.65933	2.65933	2.65933	2.42793	-3.435	-0.273955	-0.273955	-0.273955	-0.273955	-0.273955	-0.273955
3.17094	3.17094	3.23651	3.23651	3.23651	3.23651	3.23651	3.23651	3.23651	3.23651	3.23674	3.18266	3.0933	-2.89951	-2.89951	-0.99506	-0.99506	-0.60523	-0.60523
0.854008	0.801841	1.28586	1.28586	1.7257	1.7257	1.23	1.23	1.23	1.23	1.23	1.23	1.15913	1.34345	1.34345	1.34345	1.34345	1.34345	1.34345
-9.13521	-11.9276	-11.0731	-11.0731	-13.5636	-13.5636	-13.5636	-10.7759	-10.2175	-10.2175	-11.7262	-7.66737	-7.66737	-4.02495	-3.90989	-3.7556	-3.7556	-3.79431	-3.38791
-0.534337	-0.534337	-0.534337	-0.670401	-0.529107	1.50594	1.42635	1.42635	1.43977	1.43977	1.43977	1.47497	-2.02664	-2.02664	-2.02664	-1.82327	-2.03656	-0.101148	2.6932
4.94239	-0.0486907	1.96166	2.32575	2.32575	2.17849	2.9399	1.29306	-8.95147	-7.4564	-7.65047	-7.73604	-7.73604	-8.45063	-8.55574	-8.55574	-10.2201	-10.2201	-13.7875
-0.124021	-0.124021	-0.124021	-0.124021	-0.124021	-1.02823	-2.67568	-3.8665	-3.8665	-4.97278	-4.97278	-5.72666	-3.25433	-3.92207	-3.92207	-3.92207	-3.92207	-4.30468	-4.30468
-0.0359537	-0.0359537	-0.0359537	-0.0359537	-0.0359537	-0.804457	-0.804457	-9.28349	-9.28349	-9.28349	-9.28349	-12.836	-12.836	-12.836	-12.836	-12.836	-12.836	-12.836	-1.06295
0.069935	0.069935	0.069935	0.069935	0.069935	0.069935	-2.15227	-7.9946	-7.9946	-7.9946	-7.9946	-7.9946	-7.9946	-7.9946	-7.9946	-3.75415	-1.19441	-1.19441	-1.19441
0.543115	0.543115	0.543115	0.543115	0.543115	0.897837	0.897837	1.73921	0.374041	-0.363027	-1.24866	-2.13672	-1.66184	-1.66184	-1.42937	-1.42937	-1.42937	-1.42937	-1.42937
0.647692	0.647692	0.340303	0.340303	0.340303	0.340303	0.340303	0.340303	0.340303	0.340303	-0.145939	-0.145939	-0.327827	-0.327827	-0.327827	-0.327827	-0.327827	-0.327827	-0.819902
0.0485072	0.0485072	0.0485072	0.0485072	0.0485072	0.0485072	0.0485072	0.0485072	0.0485072	0.0485072	0.0485072	0.0485072	0.0485072	0.0485072	0.0485072	0.0485072	0.0485072	0.0485072	0.0485072
0.224139	0.224139	0.224139	0.224139	0.224139	0.224139	0.224139	0.224139	0.224139	0.224139	0.224139	0.224139	0.224139	0.224139	0.224139	0.224139	0.224139	0.224139	0.224139
0.396355	0.396355	0.396355	0.396355	0.396355	0.396355	0.396355	0.396355	0.396355	0.396355	0.396355	0.396355	0.396355	0.396355	0.396355	0.396355	0.396355	0.396355	3.39191
0.584453	0.584453	0.584453	0.584453	0.584453	0.584453	0.584453	-7.94293	-7.94293	-7.94293	-7.94293	-7.94293	-7.94293	-0.143207	-0.143207	-0.143207	-0.143207	-0.143207	-0.143207
0.818461	0.818461	0.818461	0.818461	0.818461	0.818461	0.818461	0.818461	0.972353	-2.68541	-0.961858	-0.436926	-0.436926	-0.436926	-0.436926	-0.436926	-0.436926	-0.436926	-0.436926
2.04927	2.04927	2.04927	2.04927	2.04927	2.04927	2.04927	2.04927	3.40819	2.07848	-1.49022	-1.49022	-1.49022	-2.60891	-2.60891	-2.60891	-2.60891	-2.60891	-2.60891
	QQR	QR
0.05	1.90168	-0.163237
0.1	0.501527	-0.126905
0.15	1.34125	-0.0407386
0.2	1.72353	-0.0622557
0.25	1.27783	-0.0977587
0.3	-8.67368	-0.103716
0.35	0.000143198	-0.153516
0.4	-4.28431	-0.202796
0.45	-2.90954	-0.223265
0.5	-6.83356	-0.205723
0.55	-3.84352	-0.243705
0.6	-0.399708	-0.269175
0.65	0.0494247	-0.254541
0.7	0.0485072	-0.2591
0.75	0.224139	-0.289544
0.8	0.554015	-0.272048
0.85	-2.33819	-0.283303
0.9	0.0198609	-0.307761
0.95	0.0924588	0.100868

## Sheet: CGD
-7.24539	-7.24539	-9.02176	-7.25842	-8.9949	-7.28001	-7.28001	-7.30651	6.10191	7.85474	7.85474	7.90206	9.53683	9.53683	9.52974	9.52974	9.52974	9.53238	9.53238
-4.71019	-5.85369	-5.85369	-4.75993	-5.90386	-4.84482	-4.94768	-5.05803	4.51783	4.80811	5.0131	6.41864	5.14345	6.48904	5.21659	6.52416	6.52416	6.53491	6.53491
-3.03268	-3.03268	-3.08608	-3.08608	-3.18598	-4.00163	-3.31834	-1.21389	0.708441	2.262	2.52226	2.52226	2.70881	1.60124	2.82315	1.70666	2.88409	2.88409	1.75783
-1.86398	-1.41987	-1.41987	-1.48039	-1.48039	-1.58162	-0.715105	-1.21389	-3.10747	-2.30946	-3.4129	-3.41765	-3.34603	-3.34603	-3.23367	-3.23367	-3.23367	-3.16208	-3.16208
-0.345674	-0.0769625	-0.375102	-0.117262	-0.185456	0.281383	0.0176406	-4.15517	-6.80869	-7.54977	-8.16096	-8.08387	-8.65866	-8.04945	-7.49319	-7.96199	-7.64314	-6.60287	-5.25274
0.631358	0.611734	0.799999	1.58755	1.6404	1.30164	0.57598	-5.06266	-6.70885	-7.54977	-8.02481	-8.08387	-8.53248	-7.56256	-7.48042	-7.05432	-6.09432	-4.95237	-3.92496
1.20351	1.18428	2.76683	2.24805	2.24817	1.93003	2.08787	1.80012	0.956949	-0.882782	-2.57165	-0.92249	-2.40271	-2.74955	-1.96359	-2.46501	-2.86966	-2.92262	-2.60308
1.56597	1.55042	2.98708	2.89217	3.59769	3.64657	4.36082	4.58864	5.27579	6.05854	6.87556	7.62331	6.4713	7.48335	7.36315	5.84976	4.48414	4.83573	2.74619
1.74055	1.71845	2.10564	2.89217	4.0518	5.04012	6.30459	7.94166	8.96806	9.88591	10.7044	10.8578	11.5868	12.1188	11.3597	10.7236	10.5679	9.47501	7.43625
1.92917	1.91136	1.23176	1.41772	2.50617	5.04012	6.30459	7.23321	8.09552	9.08316	10.0411	10.8578	11.5302	11.6836	11.3597	11.7751	12.0429	10.9076	9.50871
2.29405	2.27143	1.23176	1.02215	0.993338	1.04101	1.31495	3.32101	5.20371	6.37251	7.31125	8.48873	7.68278	8.72474	9.57723	9.40878	8.43436	8.51475	8.6556
2.83302	2.65234	2.62769	1.41772	0.993338	0.621256	-0.755693	-1.32704	-1.57675	-1.91758	-2.31785	-2.85095	-3.85866	-3.10168	-3.05144	-3.38062	-2.72399	-2.08051	-2.17988
3.49828	3.33092	3.33092	3.49486	3.31894	3.13557	1.77235	0.0129565	-1.3923	-1.64432	-2.31785	-4.15304	-3.85866	-4.3605	-5.6609	-4.41485	-4.98066	-3.83648	-3.0451
4.19865	4.19865	4.38349	4.38349	4.38349	4.19943	4.19943	4.38499	4.38499	4.20093	4.20093	4.20065	4.01192	1.57512	0.133242	-2.08778	-2.10289	-2.72399	-1.39449
5.32541	5.32541	5.32541	5.32541	5.51535	5.32667	5.32667	5.32667	5.32667	5.52044	5.33069	5.33069	5.33069	5.33763	5.33763	5.54284	5.34708	5.35793	1.45143
6.10676	6.10676	6.32977	6.32977	6.32977	6.32977	6.11801	6.35091	6.35091	6.35091	6.60947	6.38439	6.38439	6.65505	6.42668	6.71013	6.77305	7.11224	7.62291
7.10492	7.10492	7.43801	7.43801	7.43801	7.43801	7.4722	7.4722	7.4722	7.87433	7.52869	7.95214	7.95214	8.05957	8.05957	8.61149	8.19689	8.35664	8.52237
8.73627	8.73627	8.73627	9.36595	8.7683	8.7683	8.7683	9.42842	8.83654	8.83654	9.53915	8.94666	8.94666	9.70381	9.10259	9.9183	9.29935	10.1654	9.52028
10.1214	10.1214	10.1214	11.1581	10.1758	10.1758	10.1758	11.2724	10.2885	10.2885	10.2885	10.4651	10.4651	10.4651	10.7009	10.7009	10.7009	10.977	10.1654
	QQR	QR
0.05	1.83204	1.71845
0.1	1.147	1.63436
0.15	0.0222882	1.7166
0.2	-2.42841	1.83907
0.25	-4.59063	1.80012
0.3	-3.88856	1.73339
0.35	-0.311965	1.64877
0.4	4.75033	1.56538
0.45	7.6568	1.59769
0.5	7.60313	1.51427
0.55	5.36127	1.48771
0.6	-1.05144	1.31682
0.65	-0.935256	1.31069
0.7	2.56475	1.04346
0.75	5.15846	0.950787
0.8	6.49377	0.877406
0.85	7.76275	0.717804
0.9	9.16439	0.691495
0.95	10.4646	0.764979

## Sheet: OGAP
-119.621	-157.752	-233.213	-257.106	-291.641	-326.062	-355.117	-382.827	-381.358	-418.692	-380.759	-409.257	-392.343	-351.776	-328.507	-302.315	-277.9	-241.344	-194.457
-119.621	-157.752	-233.213	-257.106	-291.641	-326.062	-355.117	-382.827	-381.358	-418.692	-380.759	-409.257	-392.343	-351.776	-328.507	-302.315	-277.9	-241.344	-194.457
-119.621	-157.752	-233.213	-257.106	-291.641	-326.062	-355.117	-382.827	-381.358	-418.692	-380.759	-409.257	-392.343	-351.776	-328.507	-302.315	-277.9	-241.344	-194.457
-119.621	-157.752	-233.213	-257.106	-291.641	-326.062	-355.117	-382.827	-381.358	-418.692	-380.759	-409.257	-392.343	-351.776	-328.507	-302.315	-277.9	-241.344	-194.457
-119.621	-157.752	-233.213	-257.106	-291.641	-326.062	-355.117	-382.827	-381.358	-418.692	-380.759	-409.257	-392.343	-351.776	-328.507	-302.315	-277.9	-241.344	-194.457
-119.621	-157.752	-233.213	-257.106	-291.641	-326.062	-355.117	-382.827	-381.358	-418.692	-380.759	-409.257	-392.343	-351.776	-328.507	-302.315	-277.9	-241.344	-194.457
-119.621	-157.752	-233.213	-257.106	-291.641	-326.062	-355.117	-382.827	-381.358	-418.692	-380.759	-409.257	-392.343	-351.776	-328.507	-302.315	-277.9	-241.344	-194.457
-119.621	-157.752	-233.213	-257.106	-291.641	-326.062	-355.117	-382.827	-381.358	-418.692	-380.759	-409.257	-392.343	-351.776	-328.507	-302.315	-277.9	-241.344	-194.457
-119.621	-157.752	-233.213	-257.106	-291.641	-326.062	-355.117	-382.827	-381.358	-418.692	-380.759	-409.257	-392.343	-351.776	-328.507	-302.315	-277.9	-241.344	-194.457
-119.621	-157.752	-233.213	-257.106	-291.641	-326.062	-355.117	-382.827	-381.358	-418.692	-380.759	-409.257	-392.343	-351.776	-328.507	-302.315	-277.9	-241.344	-194.457
-119.621	-157.752	-233.213	-257.106	-291.641	-326.062	-355.117	-382.827	-381.358	-418.692	-380.759	-409.257	-392.343	-351.776	-328.507	-302.315	-277.9	-241.344	-194.457
-119.621	-157.752	-233.213	-257.106	-291.641	-326.062	-355.117	-382.827	-381.358	-418.692	-380.759	-409.257	-392.343	-351.776	-328.507	-302.315	-277.9	-241.344	-194.457
-119.621	-157.752	-233.213	-257.106	-291.641	-326.062	-355.117	-382.827	-381.358	-418.692	-380.759	-409.257	-392.343	-351.776	-328.507	-302.315	-277.9	-241.344	-194.457
-119.621	-157.752	-233.213	-257.106	-291.641	-326.062	-355.117	-382.827	-381.358	-418.692	-380.759	-409.257	-392.343	-351.776	-328.507	-302.315	-277.9	-241.344	-194.457
-119.621	-157.752	-233.213	-257.106	-291.641	-326.062	-355.117	-382.827	-381.358	-418.692	-380.759	-409.257	-392.343	-351.776	-328.507	-302.315	-277.9	-241.344	-194.457
-119.621	-157.752	-233.213	-257.106	-291.641	-326.062	-355.117	-382.827	-381.358	-418.692	-380.759	-409.257	-392.343	-351.776	-328.507	-302.315	-277.9	-241.344	-194.457
-119.621	-157.752	-233.213	-257.106	-291.641	-326.062	-355.117	-382.827	-381.358	-418.692	-380.759	-409.257	-392.343	-351.776	-328.507	-302.315	-277.9	-241.344	-194.457
-119.621	-157.752	-233.213	-257.106	-291.641	-326.062	-355.117	-382.827	-381.358	-418.692	-380.759	-409.257	-392.343	-351.776	-328.507	-302.315	-277.9	-241.344	-194.457
-119.621	-157.752	-233.213	-257.106	-291.641	-326.062	-355.117	-382.827	-381.358	-418.692	-380.759	-409.257	-392.343	-351.776	-328.507	-302.315	-277.9	-241.344	-194.457
	QQR	QR
0.05	-305.371	-119.621
0.1	-305.371	-157.752
0.15	-305.371	-233.213
0.2	-305.371	-257.106
0.25	-305.371	-291.641
0.3	-305.371	-326.062
0.35	-305.371	-355.117
0.4	-305.371	-382.827
0.45	-305.371	-381.358
0.5	-305.371	-418.692
0.55	-305.371	-380.759
0.6	-305.371	-409.257
0.65	-305.371	-392.343
0.7	-305.371	-351.776
0.75	-305.371	-328.507
0.8	-305.371	-302.315
0.85	-305.371	-277.9
0.9	-305.371	-241.344
0.95	-305.371	-194.457
