# Supplementary material for: Macroeconomic Imbalances and Financial Stress Among BRICS: Analysis of Frequency-Dependent and Asymmetric Causal Nexuses
Source: publisher site journal article supplement (doi:10.1515/snde-2024-0045), 2025-04-16
Supplement: Supplementary file 67 [file Residual.xlsx]

## Sheet: CA
-0.46205	-0.46205	-0.46205	-0.456548	-0.456548	-0.456548	-0.456548	-0.463129	-0.457865	-0.457865	-0.457865	-0.452567	-0.452567	-0.452567	-0.453429	-0.453429	-0.446398	-0.446398	-0.428741
-0.175683	-0.175683	-0.175683	-0.175683	-0.187961	-0.187961	-0.175273	-0.175273	-0.175273	-0.187274	-0.187274	-0.174469	-0.186154	-0.186154	-0.186154	-0.18463	-0.18463	-0.196124	-0.193769
-0.0347258	-0.0347258	-0.0347258	-0.0347258	-0.0347258	-0.0347258	-0.0347258	-0.0347258	-0.0392886	-0.0392886	-0.0347077	-0.0347077	-0.0347077	-0.0347077	-0.0392514	-0.0392514	-0.0346685	-0.0346685	-0.0391877
0.00415283	0.00415283	0.00415283	0.00415283	0.00415283	0.00415283	0.00415283	0.00173695	0.00173695	0.00173695	0.00173695	0.00173695	0.00173695	0.00173695	0.00173695	0.00173695	0.00176527	0.00176527	0.00176527
0.0205901	0.0205901	0.0205901	0.0205901	0.0205901	0.0205901	0.0205901	0.0205901	0.0205901	0.0205901	0.0205901	0.0205901	0.0205901	0.0205901	0.0187658	0.0206225	0.0206225	0.0206225	0.0206225
0.0339055	0.0339055	0.0339055	0.0339055	0.0339055	0.0339055	0.0339055	0.0339055	0.0339055	0.0339055	0.0339055	0.0323582	0.0323582	0.0323582	0.0323582	0.0323582	0.0323582	0.0323582	0.0339515
0.0431166	0.0431166	0.0431166	0.0431166	0.0431166	0.0431166	0.0431166	0.0431166	0.0431166	0.0431166	0.0431166	0.0431166	0.0431166	0.0431166	0.0431166	0.0431166	0.0446761	0.0431768	0.0431768
0.052512	0.052512	0.052512	0.052512	0.052512	0.052512	0.052512	0.052512	0.052512	0.052512	0.052512	0.052512	0.052512	0.052512	0.052512	0.052512	0.0541747	0.0541747	0.0525888
0.0628415	0.0628415	0.0628415	0.0628415	0.0628415	0.0628415	0.0628415	0.0628415	0.0628415	0.0628415	0.0628415	0.0628415	0.0628415	0.0628415	0.0628415	0.0628415	0.0628415	0.0628415	0.0629378
0.0749616	0.0749616	0.0749616	0.0749616	0.0749616	0.0749616	0.0749616	0.0749616	0.0749616	0.0749616	0.0749616	0.0749616	0.0749616	0.0749616	0.0749616	0.0728267	0.0728267	0.0728267	0.0728267
0.0893795	0.0893795	0.0893795	0.0893795	0.0893795	0.0893795	0.0893795	0.0893795	0.0893795	0.0893795	0.0893795	0.0893795	0.0893795	0.0868221	0.0868221	0.0868221	0.0868221	0.0868221	0.0868221
0.100778	0.100778	0.100778	0.100778	0.100778	0.100778	0.100778	0.100778	0.100778	0.100778	0.100778	0.100778	0.100778	0.103973	0.103973	0.103973	0.103973	0.103973	0.103973
0.121774	0.121774	0.121774	0.121774	0.121774	0.121774	0.121774	0.121774	0.121774	0.121774	0.121774	0.121774	0.121774	0.125817	0.125817	0.125817	0.125817	0.125817	0.125817
0.148659	0.148659	0.148659	0.148659	0.148659	0.148659	0.148659	0.148659	0.148659	0.148659	0.148659	0.153951	0.153951	0.153951	0.153951	0.153951	0.153951	0.153951	0.153951
0.198468	0.198468	0.198468	0.198468	0.198468	0.198468	0.198468	0.198468	0.198468	0.198468	0.198468	0.198468	0.198468	0.198468	0.198468	0.198334	0.198334	0.198334	0.198334
0.265114	0.265114	0.265114	0.265114	0.265114	0.265114	0.265114	0.265114	0.274499	0.274499	0.274499	0.274499	0.274499	0.274499	0.274499	0.264798	0.264798	0.273992	0.273992
0.395689	0.395689	0.395689	0.395689	0.395689	0.395689	0.395689	0.395689	0.395689	0.394977	0.394977	0.394977	0.394977	0.394977	0.394977	0.406397	0.39357	0.39357	0.40456
0.576583	0.576583	0.576583	0.576583	0.576583	0.576583	0.567228	0.57543	0.57543	0.57543	0.57543	0.57543	0.582844	0.573204	0.573204	0.573204	0.580282	0.570063	0.577042
0.785289	0.785289	0.785289	0.785289	0.785289	0.816307	0.816307	0.787212	0.787212	0.787212	0.787212	0.787212	0.762546	0.790821	0.790821	0.790821	0.767054	0.767054	0.746845
	QQR	QR
0.05	-0.454482	0.0688198
0.1	-0.18269	0.0698177
0.15	-0.0359074	0.0709416
0.2	0.00263148	0.0733149
0.25	0.0205009	0.0753175
0.3	0.0333379	0.0761092
0.35	0.043205	0.0816018
0.4	0.0526911	0.083109
0.45	0.0628466	0.0862771
0.5	0.0745122	0.0926945
0.55	0.0885719	0.0947503
0.6	0.101787	0.0982293
0.65	0.123051	0.100261
0.7	0.150887	0.106703
0.75	0.19844	0.108327
0.8	0.269473	0.111181
0.85	0.396272	0.114889
0.9	0.575459	0.116943
0.95	0.784794	0.116698

## Sheet: CGD
0.0778447	0.0777691	0.0776684	0.0775928	0.0775593	0.0775653	0.0775991	0.0991511	0.0997413	0.123673	0.490043	1.06883	1.08804	1.10886	1.10864	1.10841	1.10815	1.10789	1.10767
0.146871	0.147332	0.148061	0.14903	0.134213	0.135346	0.136642	0.157026	0.161757	0.206272	0.312066	1.02113	1.0356	1.05195	1.03707	1.03766	1.03821	1.03868	1.03903
0.203502	0.204316	0.205659	0.207477	0.225028	0.215413	0.218849	0.226971	0.217256	0.248846	0.312066	0.971269	0.984783	0.98476	0.975198	0.986994	0.987773	0.988391	0.988775
0.312175	0.313269	0.315131	0.317791	0.308684	0.313281	0.30681	0.320162	0.315841	0.320461	0.352227	0.41255	0.943428	0.940651	0.939778	0.9322	0.932317	0.932501	0.932614
0.408031	0.427239	0.429265	0.4323	0.436332	0.425117	0.431476	0.447366	0.443114	0.453981	0.445884	0.41255	0.91955	0.911177	0.903602	0.896494	0.895064	0.89401	0.893328
0.591196	0.59279	0.62387	0.595452	0.59923	0.604206	0.610493	0.594127	0.603836	0.628464	0.586906	0.554935	0.913047	0.896687	0.890951	0.884478	0.88268	0.883657	0.884477
0.900969	0.852064	0.854729	0.907019	0.912449	0.86457	0.87216	0.881867	0.893947	0.908659	0.926228	1.29195	0.932292	0.896687	0.886719	0.884478	0.885074	0.883657	0.886225
1.52059	1.55028	1.57049	1.56701	1.58197	1.59812	1.56797	1.61251	1.60208	1.61836	1.59377	1.48986	0.956323	0.907764	0.897932	0.892445	0.890177	0.892072	0.895185
1.58947	1.63507	1.6918	1.68023	1.72741	1.72511	1.78131	1.77674	1.78122	1.6833	1.64876	1.17845	0.940228	0.926311	0.914059	0.909477	0.911795	0.905088	0.908718
1.52059	1.58073	1.62468	1.61354	1.64858	1.63969	1.68564	1.63722	1.53333	0.992969	0.973423	0.955894	0.940228	0.933961	0.933961	0.936194	0.930809	0.93396	0.933656
1.4748	1.50479	1.51789	1.51111	1.45792	1.0513	1.01327	0.991566	0.982168	0.972047	0.973423	0.973423	0.965316	0.957834	0.957834	0.960356	0.953774	0.963484	0.971707
1.42963	1.26223	1.06345	1.03652	1.01241	1.00164	1.00164	0.991566	1.00277	1.00277	0.992969	0.992969	0.994967	0.994967	0.986116	0.997582	1.00084	1.00477	1.0094
1.10987	1.07785	1.04936	1.03652	1.05001	1.03745	1.03745	1.03745	1.03745	1.03901	1.03901	1.02753	1.04121	1.04121	1.04406	1.05914	1.04761	1.05189	1.0736
1.10987	1.10987	1.09365	1.09365	1.11061	1.09473	1.09473	1.1121	1.1121	1.09653	1.11436	1.11436	1.11739	1.11739	1.12123	1.12123	1.12593	1.15333	1.18524
1.18708	1.18708	1.18708	1.18797	1.18797	1.18797	1.18977	1.18977	1.21394	1.19251	1.19251	1.21736	1.19622	1.22182	1.22735	1.25616	1.26383	1.27277	1.31837
1.28833	1.31927	1.31927	1.28952	1.32118	1.32118	1.29188	1.32436	1.32436	1.32882	1.32882	1.36554	1.33461	1.37248	1.34175	1.38091	1.39089	1.40249	1.41569
1.42704	1.4707	1.4707	1.42862	1.47327	1.47327	1.43179	1.47756	1.47756	1.48361	1.48361	1.48361	1.49144	1.5456	1.50111	1.5571	1.51265	1.52603	1.54099
1.62782	1.62782	1.6936	1.63002	1.63002	1.69723	1.63444	1.63444	1.64111	1.64111	1.64111	1.65009	1.65009	1.66139	1.66139	1.60642	1.6199	1.6199	1.58562
1.76558	1.8491	1.8491	1.8491	1.76824	1.85357	1.85357	1.77361	1.86104	1.86104	1.78171	1.87152	1.79255	1.79255	1.80596	1.80596	1.73651	1.75192	1.69022
	QQR	QR
0.05	0.534878	1.43293
0.1	0.533366	1.40503
0.15	0.544912	1.37021
0.2	0.550625	1.29608
0.25	0.605573	1.21673
0.3	0.706394	1.16198
0.35	0.911671	1.1153
0.4	1.32657	1.08897
0.45	1.38498	1.05914
0.5	1.26048	1.05189
0.55	1.11337	1.0318
0.6	1.04101	1.02881
0.65	1.04935	1.02696
0.7	1.1157	1.03575
0.75	1.21461	1.04624
0.8	1.34007	1.0533
0.85	1.48717	1.06503
0.9	1.63966	1.09586
0.95	1.80594	1.11319

## Sheet: OGAP
-173.932	-171.786	-170.615	-167.753	-166.979	-164.038	-161.192	-158.622	-157.732	-155.822	-154.321	-153.291	-151.743	-153.154	-153.045	-154.776	-155.317	-157.162	-158.071
-173.932	-171.786	-170.615	-167.753	-166.979	-164.038	-161.192	-158.622	-157.732	-155.822	-154.321	-153.291	-151.743	-153.154	-153.045	-154.776	-155.317	-157.162	-158.071
-173.932	-171.786	-170.615	-167.753	-166.979	-164.038	-161.192	-158.622	-157.732	-155.822	-154.321	-153.291	-151.743	-153.154	-153.045	-154.776	-155.317	-157.162	-158.071
-173.932	-171.786	-170.615	-167.753	-166.979	-164.038	-161.192	-158.622	-157.732	-155.822	-154.321	-153.291	-151.743	-153.154	-153.045	-154.776	-155.317	-157.162	-158.071
-173.932	-171.786	-170.615	-167.753	-166.979	-164.038	-161.192	-158.622	-157.732	-155.822	-154.321	-153.291	-151.743	-153.154	-153.045	-154.776	-155.317	-157.162	-158.071
-173.932	-171.786	-170.615	-167.753	-166.979	-164.038	-161.192	-158.622	-157.732	-155.822	-154.321	-153.291	-151.743	-153.154	-153.045	-154.776	-155.317	-157.162	-158.071
-173.932	-171.786	-170.615	-167.753	-166.979	-164.038	-161.192	-158.622	-157.732	-155.822	-154.321	-153.291	-151.743	-153.154	-153.045	-154.776	-155.317	-157.162	-158.071
-173.932	-171.786	-170.615	-167.753	-166.979	-164.038	-161.192	-158.622	-157.732	-155.822	-154.321	-153.291	-151.743	-153.154	-153.045	-154.776	-155.317	-157.162	-158.071
-173.932	-171.786	-170.615	-167.753	-166.979	-164.038	-161.192	-158.622	-157.732	-155.822	-154.321	-153.291	-151.743	-153.154	-153.045	-154.776	-155.317	-157.162	-158.071
-173.932	-171.786	-170.615	-167.753	-166.979	-164.038	-161.192	-158.622	-157.732	-155.822	-154.321	-153.291	-151.743	-153.154	-153.045	-154.776	-155.317	-157.162	-158.071
-173.932	-171.786	-170.615	-167.753	-166.979	-164.038	-161.192	-158.622	-157.732	-155.822	-154.321	-153.291	-151.743	-153.154	-153.045	-154.776	-155.317	-157.162	-158.071
-173.932	-171.786	-170.615	-167.753	-166.979	-164.038	-161.192	-158.622	-157.732	-155.822	-154.321	-153.291	-151.743	-153.154	-153.045	-154.776	-155.317	-157.162	-158.071
-173.932	-171.786	-170.615	-167.753	-166.979	-164.038	-161.192	-158.622	-157.732	-155.822	-154.321	-153.291	-151.743	-153.154	-153.045	-154.776	-155.317	-157.162	-158.071
-173.932	-171.786	-170.615	-167.753	-166.979	-164.038	-161.192	-158.622	-157.732	-155.822	-154.321	-153.291	-151.743	-153.154	-153.045	-154.776	-155.317	-157.162	-158.071
-173.932	-171.786	-170.615	-167.753	-166.979	-164.038	-161.192	-158.622	-157.732	-155.822	-154.321	-153.291	-151.743	-153.154	-153.045	-154.776	-155.317	-157.162	-158.071
-173.932	-171.786	-170.615	-167.753	-166.979	-164.038	-161.192	-158.622	-157.732	-155.822	-154.321	-153.291	-151.743	-153.154	-153.045	-154.776	-155.317	-157.162	-158.071
-173.932	-171.786	-170.615	-167.753	-166.979	-164.038	-161.192	-158.622	-157.732	-155.822	-154.321	-153.291	-151.743	-153.154	-153.045	-154.776	-155.317	-157.162	-158.071
-173.932	-171.786	-170.615	-167.753	-166.979	-164.038	-161.192	-158.622	-157.732	-155.822	-154.321	-153.291	-151.743	-153.154	-153.045	-154.776	-155.317	-157.162	-158.071
-173.932	-171.786	-170.615	-167.753	-166.979	-164.038	-161.192	-158.622	-157.732	-155.822	-154.321	-153.291	-151.743	-153.154	-153.045	-154.776	-155.317	-157.162	-158.071
	QQR	QR
0.05	-159.966	-173.932
0.1	-159.966	-171.786
0.15	-159.966	-170.615
0.2	-159.966	-167.753
0.25	-159.966	-166.979
0.3	-159.966	-164.038
0.35	-159.966	-161.192
0.4	-159.966	-158.622
0.45	-159.966	-157.732
0.5	-159.966	-155.822
0.55	-159.966	-154.321
0.6	-159.966	-153.291
0.65	-159.966	-151.743
0.7	-159.966	-153.154
0.75	-159.966	-153.045
0.8	-159.966	-154.776
0.85	-159.966	-155.317
0.9	-159.966	-157.162
0.95	-159.966	-158.071
