# Supplementary material for: Macroeconomic Imbalances and Financial Stress Among BRICS: Analysis of Frequency-Dependent and Asymmetric Causal Nexuses
Source: publisher site journal article supplement (doi:10.1515/snde-2024-0045), 2025-04-16
Supplement: Supplementary file 68 [file Signal.xlsx]

## Sheet: CA
	QQR	QR
0.05	#DIV/0!
0.1	#DIV/0!
0.15	#DIV/0!
0.2	#DIV/0!
0.25	#DIV/0!
0.3	#DIV/0!
0.35	#DIV/0!
0.4	#DIV/0!
0.45	#DIV/0!
0.5	#DIV/0!
0.55	#DIV/0!
0.6	#DIV/0!
0.65	#DIV/0!
0.7	#DIV/0!
0.75	#DIV/0!
0.8	#DIV/0!
0.85	#DIV/0!
0.9	#DIV/0!
0.95	#DIV/0!

## Sheet: CGD
-9.10335	-9.10335	0.764285	1.58361	1.58361	2.07918	4.43873	0.235208	0.235208	-8.68489	-8.68489	-0.406196	0.774379	5.19733	-2.16787	-6.27251	-14.9243	-13.4086	-13.4086
7.74604	0.524876	0.764285	2.18031	2.07918	4.43873	6.70587	5.69411	5.4265	8.45328	7.0883	-0.406196	-3.35514	-9.82265	-8.99987	-11.1376	-11.1376	-11.8056	-10.7285
6.06116	1.58154	5.02224	3.00503	2.54423	2.39598	5.62643	5.69411	7.17724	4.44539	1.71102	-0.0567118	-2.7787	-3.08419	-4.28262	-7.19	-7.84748	-2.01471	-0.468981
-6.23464	0.252629	0.259481	-1.22777	-1.25262	-5.22187	-5.22187	-5.123	-6.32419	-5.61157	-5.63508	-4.87135	-3.08419	-3.08419	-3.01952	-2.01767	-2.35483	-2.01471	-2.5799
9.26769	7.87164	2.38972	4.50231	3.71725	3.71725	3.72851	3.83902	3.95897	3.48941	3.74189	3.99877	6.20867	2.45557	2.33774	2.03971	2.71249	4.60594	3.34937
4.92566	5.99289	2.84578	3.23907	4.93476	6.62276	6.69531	8.053	10.7564	16.2127	16.9847	17.6062	18.8337	19.237	21.8126	18.117	16.9721	15.6074	20.8876
0.949889	0.256213	-0.338731	-1.333	-0.189091	-1.84995	2.91209	2.55834	0.544988	1.41126	0.639439	-0.883776	1.96008	-0.483211	-1.40294	-1.74459	-2.90655	-10.7415	-15.703
-4.95421	-5.98038	-1.29475	-1.333	-1.95839	-0.503985	2.91209	3.58871	0.544988	1.41126	1.41126	1.58286	2.46361	1.24991	-1.40294	-3.05928	-4.03633	-8.12034	-15.703
-4.95421	-6.02284	-6.02284	0.4381	0.253599	-1.9647	-2.98467	-5.82661	-4.65401	-4.69812	-3.74329	-5.69579	-5.69579	-5.69579	-7.26701	-7.26701	-7.26701	-7.44332	-7.44332
2.76959	6.15141	0.4381	-1.9647	-1.9647	-1.9647	-1.9647	-1.9647	0.280992	0.280992	0.280992	-4.43322	-6.19955	-5.69579	-5.69579	-5.69579	-5.69579	-3.69301	-3.69301
-2.21971	-2.21971	-2.21971	-2.39732	-1.97397	-1.97397	-1.97397	-1.97397	-4.43322	0.280992	0.280992	0.280992	5.4188	5.4188	5.4188	5.4188	2.88281	2.88281	4.60982
9.08781	13.8041	13.8041	13.8041	15.2452	20.9102	20.9102	20.9102	15.7349	9.80574	9.80574	9.80574	10.9576	10.9576	9.83029	8.12543	8.12543	10.4782	10.4782
9.08781	13.8041	11.9439	15.2452	9.6913	9.57707	9.57707	9.57707	9.57707	9.57707	15.7349	15.7349	15.7349	16.1691	16.1691	16.1691	16.1691	11.1557	10.4782
1.85588	-0.0713394	0.8182	0.8182	-4.39052	-4.39052	-3.38683	-2.24943	-2.24943	-1.19396	-1.19396	-1.19396	-1.19396	-1.06544	-1.06544	-1.06544	-1.06544	-1.06544	-1.06544
-0.0713394	-4.70355	-4.70355	-4.70355	-4.39052	-4.39052	-1.61166	-1.61166	-3.38683	-3.98011	-3.98011	-2.58655	-2.58655	-2.58655	-3.36073	-3.36073	-2.33545	-2.33545	-2.33545
0.764759	0.764759	0.764759	0.764759	4.13975	4.13975	4.13975	4.13975	4.13975	4.13975	5.33818	3.43059	3.43059	3.43059	3.43046	3.43086	3.43086	7.31102	9.96383
17.6062	17.8668	17.8668	17.8668	17.433	17.1783	12.7423	12.7423	14.6514	14.6514	15.4294	14.8163	14.8163	20.4402	20.4402	31.046	31.046	28.6768	28.6768
17.6062	17.6062	17.1783	17.433	17.433	17.433	17.433	17.433	14.9603	14.8163	13.5528	13.5528	-0.596081	-0.596081	-0.596081	-18.7979	-18.7979	-18.7979	-18.7979
17.1783	17.1783	17.1783	16.6209	16.6209	16.6209	16.6209	13.5528	13.5528	13.5528	13.5528	13.5528	-0.596081	-0.596081	-0.596081	-0.596081	-18.7979	-18.7979	-18.7979
	QQR	QR
0.05	-3.64595	1.45252
0.1	-0.857453	1.51912
0.15	0.923209	2.26242
0.2	-3.38773	2.46672
0.25	4.10168	2.37957
0.3	12.4388	2.47128
0.35	-1.38653	2.39233
0.4	-1.74642	2.38099
0.45	-4.94498	2.36821
0.5	-2.12755	2.31135
0.55	0.605688	2.38277
0.6	12.7674	2.43694
0.65	12.6933	2.49389
0.7	-1.28496	2.33476
0.75	-3.10636	2.97906
0.8	3.74182	3.01998
0.85	19.2628	2.84687
0.9	6.28727	3.00249
0.95	6.68444	3.52686

## Sheet: OGAP
-1.08096	3.41217	2.5454	0.409563	-1.33025	-0.793739	2.41233	1.35501	1.68157	4.27494	6.68587	9.40638	12.366	11.0249	14.0475	11.8145	16.6388	22.3044	23.1101
-1.08096	3.41217	2.5454	0.409563	0.527857	-0.341133	2.41233	1.35501	1.68157	4.1749	6.68587	9.40638	11.1954	11.0249	14.0475	11.8145	14.6781	22.3044	23.1101
-1.08096	3.41217	2.5454	0.409563	0.527857	-0.341133	2.41233	1.35501	1.68157	4.1749	5.50975	8.23426	11.1954	11.0249	14.0475	11.8145	14.6781	22.3044	23.1101
-1.08096	3.41217	2.5454	0.409563	0.527857	-0.341133	2.41233	1.35501	1.68157	4.1749	5.50975	8.23426	10.4426	11.0249	9.43083	7.76316	14.6781	22.3044	23.1101
-1.08096	3.41217	2.5454	0.409563	0.527857	-0.341133	2.41233	1.35501	1.68157	4.1749	4.58062	8.23426	7.77005	11.0249	7.11814	7.76316	14.6781	22.3044	23.1101
-1.08096	3.41217	2.5454	0.409563	0.527857	-0.341133	2.41233	1.35501	1.59476	2.92493	4.58062	7.54773	7.77005	10.9496	5.52831	7.76316	14.6781	22.3044	23.1101
-1.08096	0.790956	2.5454	0.409563	0.527857	-0.341133	2.41233	1.35501	1.25704	2.92493	4.32441	7.52318	7.77005	10.9496	5.52831	5.2293	12.7234	22.3044	23.1101
-1.08096	0.790956	1.70075	0.409563	0.270882	-0.341133	2.41233	1.35501	1.25704	0.957011	3.05743	7.16987	7.64445	2.91782	5.52831	4.58255	12.7234	22.3044	23.1101
-1.08096	0.790956	0.21693	0.409563	0.270882	-0.341133	2.41233	1.35501	1.25704	0.957011	3.05743	5.40557	7.38608	2.47271	3.04962	4.58255	8.12314	22.3044	23.1101
-1.08096	0.790956	0.21693	0.409563	-0.0579172	-0.793739	2.41233	1.35501	0.801682	0.484072	2.41206	5.40557	5.10028	2.10548	2.09679	0.65093	6.26975	16.5233	23.1101
-1.08096	-4.3693	0.21693	-0.648982	-0.0579172	-0.793739	0.212764	1.35501	0.404717	-0.172479	1.80463	4.68456	4.54681	1.08705	-0.301927	-4.80932	3.03119	16.5233	23.1101
-1.08096	-4.3693	0.21693	-0.648982	-1.33025	-0.793739	0.060339	-0.787819	0.404717	-0.546989	1.41661	4.22195	0.771187	0.31494	-0.923699	-5.01273	-9.30938	16.5233	23.1101
-1.08096	-4.3693	0.21693	-1.66609	-1.33025	-1.9008	0.060339	-0.787819	-0.872443	-0.546989	1.27583	-2.37545	-0.854264	0.31494	-1.68534	-5.01273	-9.30938	16.5233	6.55273
-1.08096	-4.3693	0.21693	-1.66609	-1.33025	-1.9008	0.060339	-0.787819	-1.87966	-0.782612	1.05333	-2.37545	-3.49501	-0.749391	-2.16136	-5.0655	-9.43444	16.5233	6.55273
-1.08096	-4.3693	0.21693	-1.66609	-1.33025	-1.91393	-0.264198	-0.787819	-2.02511	-0.966934	-2.48756	-3.20872	-3.49501	-7.21338	-2.16136	-5.67448	-9.43444	16.5233	6.55273
-1.08096	-4.3693	0.21693	-1.66609	-2.44546	-1.91393	-0.98335	-0.942659	-2.4143	-1.50129	-4.35371	-4.05081	-6.03851	-7.2424	-5.85546	-5.67448	-9.43444	16.5233	6.55273
-1.08096	-4.90793	0.00720405	-1.66675	-2.44546	-1.91393	-0.98335	-0.942659	-2.43627	-1.50129	-4.35371	-4.9483	-12.1092	-7.28363	-6.53353	-5.67448	-9.43444	16.5233	-19.3996
-1.08096	-4.90793	-1.42748	-2.38035	-2.44546	-1.91393	-4.94798	-2.47928	-2.92797	-1.93887	-4.35371	-7.0969	-12.1092	-11.1265	-6.91696	-7.12457	-9.43444	-9.7275	-19.3996
-1.08096	-4.90793	-1.42748	-2.38035	-2.73454	-1.91393	-5.05259	-2.47928	-3.29766	-1.93887	-4.35371	-7.0969	-13.5596	-12.8965	-15.1556	-7.12457	-9.43444	-9.7275	-19.3996
	QQR	QR
0.05	7.3834	-1.08096
0.1	7.33494	-2.26077
0.15	7.21135	0.21693
0.2	6.71551	-0.648982
0.25	6.40423	-1.33025
0.3	6.21011	-1.24055
0.35	5.80336	0.060339
0.4	5.09315	1.00458
0.45	4.51259	0.512482
0.5	3.59011	-0.503292
0.55	2.35486	1.49569
0.6	1.17033	2.18293
0.65	-0.36041	5.60439
0.7	-0.66695	1.55788
0.75	-1.30456	0.533735
0.8	-1.93022	3.00967
0.85	-3.74132	-0.3658
0.9	-5.9863	18.7781
0.95	-6.62958	23.1101
