# Supplementary material for: Macroeconomic Imbalances and Financial Stress Among BRICS: Analysis of Frequency-Dependent and Asymmetric Causal Nexuses
Source: publisher site journal article supplement (doi:10.1515/snde-2024-0045), 2025-04-16
Supplement: Supplementary file 69 [file IMF1.xlsx]

## Sheet: CA
2.49107	2.49107	2.49107	2.49107	2.49107	2.49107	2.49107	2.49107	2.49107	2.49107	2.49107	2.49107	2.49107	2.49107	2.49107	2.49107	2.49107	2.49107	2.49107
2.49107	2.49107	2.49107	2.49107	2.49107	2.49107	2.49107	2.49107	2.49107	2.49107	2.49107	2.49107	2.49107	2.49107	2.49107	2.49107	2.49107	2.49107	2.49107
2.49107	2.49107	2.49107	2.49107	2.49107	2.49107	2.49107	2.49107	2.49107	2.49107	2.49107	2.49107	2.49107	2.49107	2.49107	2.49107	2.49107	2.49107	2.49107
-1.90939	-1.90939	-1.90939	-1.90939	-1.57936	-1.57936	-1.57936	-1.57936	-1.57936	-1.57936	-1.57936	-1.57936	-1.57936	-1.57936	-1.57936	-1.57936	-1.57936	-1.57936	-1.57936
-8.0564	-8.0564	-8.0564	-8.0564	-8.0564	-8.0564	-8.0564	-8.0564	-8.0564	-8.0564	-8.0564	-8.0564	-8.0564	-8.0564	-8.0564	-8.0564	1.93338	1.93338	1.93338
4.25772	4.25772	4.25772	4.25772	4.25772	4.25772	4.25772	4.25772	4.25772	4.25772	1.93338	1.93338	1.93338	1.93338	1.93338	1.93338	1.93338	1.93338	1.93338
-1.81005	-1.81005	-0.108865	-0.108865	-0.108865	-0.108865	-0.108865	-0.108865	-0.108865	-0.108865	-0.108865	-0.108865	-0.108865	-0.108865	1.46887	1.46887	1.46887	1.46887	1.46887
-4.02668	-4.02668	3.55006	3.55006	3.55006	3.55006	-0.680087	-0.680087	2.20766	2.20766	2.20766	-0.281578	-0.281578	8.0885	11.1802	11.1802	11.1802	11.1802	11.1802
1.91033	1.91033	1.91033	1.91033	1.91033	-0.391933	-0.391933	0.057917	0.057917	0.057917	-1.53028	-2.38679	-2.38679	0.543355	-2.37123	-6.23209	-6.23209	-7.81778	-7.81778
1.91033	1.91033	1.91033	1.91033	0.59071	2.95213	2.95213	2.95213	2.95213	2.95213	2.5195	2.5195	1.34006	1.34006	1.34006	6.45547	1.86409	1.86409	1.86409
4.71758	4.71758	4.71758	2.58015	0.59071	-0.777432	-0.777432	-0.777432	1.25659	6.49634	6.49634	6.49634	5.68963	5.68963	5.68963	4.9375	1.31242	1.31242	1.31242
-0.538071	-0.538071	-4.88545	-4.88545	-4.25667	-4.25667	-3.11102	-3.11102	-3.11102	-3.11102	-3.11102	-3.11102	-3.11102	-3.11102	-3.11102	-2.11412	-2.11412	-2.11412	-2.11412
-0.456952	1.33057	1.61813	1.61813	1.61813	1.61813	1.55799	1.55799	1.55799	1.55799	1.89429	1.89429	-1.61238	-1.61238	0.0156724	2.11801	2.11801	2.11801	1.39161
3.68056	3.68056	3.68056	3.68056	0.373666	-0.570569	-0.570569	2.44862	2.44862	2.16086	2.16086	2.16086	2.16086	2.87734	0.811646	-1.74296	-1.74296	-1.74296	-0.531916
-2.60032	1.45951	3.89708	2.05886	2.05886	2.05886	0.903911	0.903911	0.903911	0.903911	0.903911	0.903911	0.903911	0.903911	0.903911	0.903911	0.86487	0.86487	0.86487
-7.61454	-7.61454	-7.61454	-7.61454	-25.8683	-25.8683	-25.8683	-4.66078	-4.66078	-4.66078	-4.66078	-4.66078	-4.66078	-4.66078	-4.66078	-4.66078	-4.66078	-4.66078	-4.66078
5.04786	5.04786	5.04786	5.04786	3.60122	3.60122	-0.687545	-1.42318	-1.42318	-1.42318	-1.42318	-1.42318	-1.42318	-1.42318	-1.42318	-1.42318	-1.42318	-1.42318	-1.42318
-0.687545	-0.687545	-0.687545	-0.687545	-0.687545	-2.82392	-2.82392	-2.82392	3.60122	3.60122	3.60122	3.60122	3.60122	5.82103	5.82103	5.82103	5.82103	5.82103	5.82103
5.58899	5.58899	5.58899	5.58899	5.58899	5.58899	5.58899	5.58899	-2.82392	-2.82392	-2.82392	-2.82392	-2.82392	-8.42221	-8.42221	-8.42221	-8.42221	-8.42221	-8.42221
	QQR	QR
0.05	2.49107	-0.0492276
0.1	2.49107	0.153672
0.15	2.49107	0.144786
0.2	-1.64884	0.150108
0.25	-6.47907	0.169716
0.3	3.15672	0.218589
0.35	0.127257	0.194163
0.4	3.93873	0.253792
0.45	-1.43631	0.269341
0.5	2.32103	0.276568
0.55	3.24635	0.257585
0.6	-2.93769	0.254868
0.65	1.1528	0.377658
0.7	1.33809	0.319237
0.75	1.08245	0.235644
0.8	-8.63117	0.226083
0.85	0.506748	0.160214
0.9	2.15909	0.270186
0.95	-1.04952	0.299751

## Sheet: CGD
61.7654	56.2637	54.3973	65.0184	84.1682	80.2424	73.8124	67.8789	64.7011	61.3175	59.007	51.328	48.4495	43.2572	58.0184	111.271	112.373	191.919	184.559
61.7654	56.2637	54.3973	65.0184	84.1682	80.2424	73.8124	67.8789	64.7011	61.3175	59.007	51.328	48.4495	43.2572	58.0184	111.271	112.373	191.919	184.559
61.7654	56.2637	54.3973	65.0184	84.1682	80.2424	73.8124	67.8789	64.7011	61.3175	59.007	51.328	48.4495	43.2572	58.0184	111.271	112.373	191.919	184.559
61.7654	56.2637	54.3973	65.0184	84.1682	80.2424	73.8124	67.8789	64.7011	61.3175	59.007	51.328	48.4495	43.2572	58.0184	111.271	112.373	191.919	184.559
61.7654	56.2637	54.3973	65.0184	84.1682	80.2424	73.8124	67.8789	64.7011	61.3175	59.007	51.328	48.4495	43.2572	58.0184	111.271	112.373	191.919	184.559
61.7654	56.2637	54.3973	65.0184	84.1682	80.2424	73.8124	67.8789	64.7011	61.3175	59.007	51.328	48.4495	43.2572	58.0184	111.271	112.373	191.919	184.559
61.7654	56.2637	54.3973	65.0184	84.1682	80.2424	73.8124	67.8789	64.7011	61.3175	59.007	51.328	48.4495	43.2572	58.0184	111.271	112.373	191.919	184.559
61.7654	56.2637	54.3973	65.0184	84.1682	80.2424	73.8124	67.8789	64.7011	61.3175	59.007	51.328	48.4495	43.2572	58.0184	111.271	112.373	191.919	184.559
61.7654	56.2637	54.3973	65.0184	84.1682	80.2424	73.8124	67.8789	64.7011	61.3175	59.007	51.328	48.4495	43.2572	58.0184	111.271	112.373	191.919	184.559
61.7654	56.2637	54.3973	65.0184	84.1682	80.2424	73.8124	67.8789	64.7011	61.3175	59.007	51.328	48.4495	43.2572	58.0184	111.271	112.373	191.919	184.559
61.7654	56.2637	54.3973	65.0184	84.1682	80.2424	73.8124	67.8789	64.7011	61.3175	59.007	51.328	48.4495	43.2572	58.0184	111.271	112.373	191.919	184.559
61.7654	56.2637	54.3973	65.0184	84.1682	80.2424	73.8124	67.8789	64.7011	61.3175	59.007	51.328	48.4495	43.2572	58.0184	111.271	112.373	191.919	184.559
61.7654	56.2637	54.3973	65.0184	84.1682	80.2424	73.8124	67.8789	64.7011	61.3175	59.007	51.328	48.4495	43.2572	58.0184	111.271	112.373	191.919	184.559
61.7654	56.2637	54.3973	65.0184	84.1682	80.2424	73.8124	67.8789	64.7011	61.3175	59.007	51.328	48.4495	43.2572	58.0184	111.271	112.373	191.919	184.559
61.7654	56.2637	54.3973	65.0184	84.1682	80.2424	73.8124	67.8789	64.7011	61.3175	59.007	51.328	48.4495	43.2572	58.0184	111.271	112.373	191.919	184.559
61.7654	56.2637	54.3973	65.0184	84.1682	80.2424	73.8124	67.8789	64.7011	61.3175	59.007	51.328	48.4495	43.2572	58.0184	111.271	112.373	191.919	184.559
61.7654	56.2637	54.3973	65.0184	84.1682	80.2424	73.8124	67.8789	64.7011	61.3175	59.007	51.328	48.4495	43.2572	58.0184	50.3524	112.373	191.919	184.559
61.7654	56.2637	54.3973	65.0184	84.1682	80.2424	73.8124	67.8789	64.7011	61.3175	59.007	51.328	48.4495	43.2572	58.0184	50.3524	112.373	191.919	184.559
61.7654	56.2637	54.3973	65.0184	84.1682	80.2424	73.8124	67.8789	64.7011	61.3175	59.007	51.328	48.4495	43.2572	58.0184	50.3524	112.373	191.919	184.559
	QQR	QR
0.05	80.513	61.7654
0.1	80.513	56.2637
0.15	80.513	54.3973
0.2	80.513	65.0184
0.25	80.513	84.1682
0.3	80.513	80.2424
0.35	80.513	73.8124
0.4	80.513	67.8789
0.45	80.513	64.7011
0.5	80.513	61.3175
0.55	80.513	59.007
0.6	80.513	51.328
0.65	80.513	48.4495
0.7	80.513	43.2572
0.75	80.513	58.0184
0.8	80.513	111.271
0.85	77.3068	112.373
0.9	77.3068	191.919
0.95	77.3068	184.559

## Sheet: OGAP
-21.0906	2.70865	12.3665	10.036	9.09007	6.95993	4.51649	2.39375	2.20012	3.56913	3.22603	1.2581	0.819755	-1.07726	-4.69989	-6.1494	-1.21313	-5.74544	13.4599
-21.0906	2.70865	12.6915	10.036	9.09007	6.95993	4.51649	2.39375	2.20012	3.56913	3.22603	1.2581	0.819755	-1.07726	-4.69989	-6.1494	-1.21313	-5.74544	13.4599
-21.0906	2.70865	12.6915	10.036	9.09007	7.14232	4.51649	2.39375	2.20012	3.56913	3.22603	1.2581	0.819755	-1.07726	-4.69989	-6.1494	-1.21313	-5.74544	13.4599
-21.0906	2.70865	12.6915	10.036	9.09007	9.39987	4.51649	2.39375	2.20012	3.56913	3.22603	1.2581	0.819755	-1.07726	-4.69989	-6.1494	-1.21313	-5.74544	13.4599
-21.0906	2.70865	12.6915	10.036	9.09007	9.39987	9.14097	2.39375	2.20012	3.56913	3.22603	1.2581	0.819755	-1.07726	-4.69989	-6.1494	-10.7557	-5.74544	13.4599
-21.0906	2.70865	12.6915	10.036	9.09007	11.2579	9.14097	2.39375	2.20012	3.56913	3.22603	1.2581	0.819755	-1.07726	-4.69989	-6.1494	-10.7557	-5.74544	13.4599
-21.0906	2.70865	12.6915	10.036	9.09007	11.2579	9.14097	2.39375	2.20012	3.56913	3.22603	1.2581	0.819755	-1.07726	-4.69989	-6.1494	-10.7557	-5.74544	13.4599
-21.0906	2.70865	12.6915	10.036	9.09007	11.2579	9.14097	2.39375	2.20012	3.56913	3.22603	1.2581	0.819755	-1.07726	-4.69989	-6.1494	-10.7557	-5.74544	13.4599
13.8501	2.70865	12.6915	10.036	9.09007	11.2579	9.14097	2.39375	2.20012	3.56913	3.22603	1.2581	0.371766	-1.07726	-4.69989	-6.62161	-10.7557	-5.74544	13.4599
13.8501	2.70865	12.6915	10.036	9.09007	11.2579	9.14097	2.39375	2.20012	3.56913	3.22603	1.2581	0.371766	-1.07726	-4.69989	-6.62161	-10.7557	-5.74544	13.4599
13.8501	16.4843	12.6915	10.036	9.09007	11.2579	9.14097	2.39375	2.20012	3.56913	3.22603	1.2581	0.371766	-1.07726	-4.69989	-6.62161	-10.7557	-5.74544	13.4599
13.8501	16.4843	12.6915	10.036	9.09007	11.2579	9.14097	6.91236	2.20012	3.56913	1.95313	1.2581	0.371766	-1.07726	-4.69989	-6.62161	-10.7557	-5.74544	13.4599
13.8501	16.4843	12.6915	10.036	9.09007	11.2579	9.14097	6.91236	2.20012	3.56913	1.95313	1.2581	0.371766	-1.07726	-4.69989	-7.01912	-10.7557	-5.74544	13.4599
25.6442	16.4843	12.6915	10.036	9.09007	11.4476	9.14097	6.91236	6.12778	3.56913	1.95313	1.2581	0.371766	-1.07726	-4.69989	-7.01912	-10.7557	-12.9047	13.4599
25.6442	16.4843	12.6915	10.036	9.09007	11.4476	9.14097	6.91236	6.35208	4.9175	1.95313	1.2581	0.371766	-1.07726	-4.69989	-7.01912	-10.7557	-12.9047	13.4599
25.6442	16.4843	12.6915	10.036	9.09007	11.4476	9.14097	6.91236	6.35208	4.9175	1.95313	1.2581	0.371766	-1.07726	-4.69989	-7.01912	-10.7557	-12.9047	13.4599
25.6442	16.4843	12.6915	10.036	9.09007	11.4476	9.14097	6.91236	6.35208	4.9175	1.95313	1.2581	0.371766	-1.18261	-4.69989	-7.01912	-10.7557	-12.9047	13.4599
25.6442	16.4843	12.6915	10.036	9.09007	11.4476	9.14097	6.91236	6.35208	4.9175	1.95313	1.2581	0.371766	-1.18261	-4.69989	-7.01912	-10.7557	-12.9047	13.4599
25.6442	16.4843	12.6915	10.036	9.09007	11.4476	9.14097	6.91236	6.35208	4.9175	1.95313	1.2581	0.371766	-1.18261	-4.69989	-7.01912	-10.7557	-12.9047	13.4599
	QQR	QR
0.05	1.71731	13.8501
0.1	1.73441	2.70865
0.15	1.74401	12.6915
0.2	1.86283	10.036
0.25	1.60398	7.62741
0.3	1.70177	6.95993
0.35	1.70177	4.51649
0.4	1.70177	2.39375
0.45	3.49233	2.20012
0.5	3.49233	3.56913
0.55	4.21736	1.95313
0.6	4.38819	1.2581
0.65	4.36727	0.819755
0.7	4.82791	-1.07726
0.75	4.91068	-4.69989
0.8	4.91068	-6.62161
0.85	4.90514	-10.7557
0.9	4.90514	-5.74544
0.95	4.90514	13.4599
