# Supplementary material for: Macroeconomic Imbalances and Financial Stress Among BRICS: Analysis of Frequency-Dependent and Asymmetric Causal Nexuses
Source: publisher site journal article supplement (doi:10.1515/snde-2024-0045), 2025-04-16
Supplement: Supplementary file 70 [file IMF2.xlsx]

## Sheet: CA
-2.20157	0.275898	0.275898	0.275898	0.275898	0.275898	0.275898	0.275898	0.275898	0.275898	0.275898	0.275898	0.275898	0.275898	0.275898	0.275898	0.275898	0.275898	0.275898
-2.20157	-2.20157	-2.20157	-2.20157	-2.20157	0.275898	0.275898	0.275898	0.275898	0.275898	0.275898	0.275898	0.275898	0.275898	0.275898	0.275898	0.275898	0.275898	0.275898
-2.20157	-2.20157	-2.20157	-2.20157	-6.32657	-6.32657	-6.32657	-6.32657	-6.32657	-0.706381	0.275898	0.728207	0.728207	1.32969	1.32969	1.32969	1.32969	1.32969	0.824615
-0.88289	-0.88289	-0.88289	1.53713	1.53713	2.81412	2.81412	4.65044	0.728207	0.728207	0.728207	0.728207	0.648032	0.248967	1.32969	1.32969	1.32969	1.32969	1.32969
-0.88289	-0.88289	-0.88289	-0.88289	1.53713	1.53713	-2.87766	-0.884264	-0.884264	-0.884264	-0.884264	-0.884264	-0.674627	-0.674627	0.248967	0.248967	2.35854	2.35854	2.35854
0.583366	3.88415	3.88415	3.95675	3.95675	3.95675	3.95675	1.8614	2.64648	2.64648	2.64648	2.64648	2.64648	0.717282	3.87809	3.87809	3.6568	3.6568	3.6568
0.583366	-1.98864	-1.98864	-0.545304	0.0942099	0.0942099	-0.840051	-1.14371	0.309599	0.309599	0.00387443	0.00387443	0.00387443	0.00387443	-0.398233	-0.398233	3.6568	3.6568	3.6568
0.211027	3.29743	3.29743	0.232509	-1.71094	-0.892131	-0.840051	-0.840051	-0.0676493	-0.327149	0.00387443	0.00387443	0.00387443	1.6682	1.6682	-0.398233	0.0169873	2.14768	2.14768
0.211027	-2.97038	-1.79831	-0.412312	-0.412312	-0.892131	-0.869241	-0.991222	-2.35508	-0.683463	-0.683463	-0.683463	-0.683463	-2.71869	-1.81035	-1.81035	-1.96788	-1.96788	-1.96788
-1.31697	0.211027	1.94579	-0.545308	-0.412312	-0.763697	-0.869241	-0.252849	0.803164	0.234087	-0.224204	-0.224204	-0.224204	-0.00400797	0.210834	-0.126545	-0.525699	-1.96788	-1.96788
-1.31697	-1.21132	-0.763697	-0.763697	-0.763697	-0.536193	-0.252849	-0.324117	-0.324117	-0.31332	-0.307606	-0.307606	-0.00400797	-0.627748	-0.627748	-2.9583	-7.41248	-7.41248	-5.16936
-3.10788	-3.84354	-6.03985	-6.03985	-0.763697	-0.536193	-2.72659	-4.46872	-4.46872	-4.46872	-2.21401	-1.93589	-1.93589	-0.965979	-1.26794	-1.26794	-2.9583	-2.9583	-5.16936
3.26927	3.26927	3.00325	4.13794	3.27666	3.27666	2.5732	2.5732	2.5732	1.25588	0.934859	0.934859	0.479051	0.479051	0.42416	0.42416	0.108541	-0.0761795	-0.707717
3.26927	3.00325	0.984781	0.745836	0.553547	-0.499888	-0.613773	0.934859	0.934859	0.934859	0.934859	1.20468	1.20468	1.20468	1.07923	1.07923	1.07923	1.07923	0.741093
2.212	2.212	2.212	2.212	2.212	2.212	2.212	2.212	0.365691	0.365691	0.365691	1.20468	1.20468	1.20468	1.20468	1.20468	1.20468	1.20468	1.07923
2.212	2.212	2.212	2.212	2.212	2.212	2.212	2.212	0.365691	-0.448385	-0.448385	-0.448385	-0.448385	-0.448385	-0.448385	-0.448385	-0.448385	-0.448385	-0.448385
0.130373	0.130373	0.130373	0.130373	0.130373	0.867303	0.867303	0.867303	0.867303	0.867303	0.867303	0.867303	0.867303	0.867303	0.867303	0.867303	0.867303	0.867303	0.360697
0.130373	0.130373	0.130373	0.130373	0.130373	0.130373	0.130373	0.130373	0.867303	0.867303	0.867303	0.867303	0.867303	0.867303	0.867303	0.867303	0.867303	0.867303	0.867303
-4.25268	-4.25268	-4.25268	-4.25268	-4.25268	-4.25268	-4.25268	-4.25268	-4.25268	-4.25268	-4.25268	-4.25268	-4.25268	-4.25268	-4.25268	-4.25268	-4.25268	-4.25268	-4.25268
	QQR	QR
0.05	0.145505	-0.150792
0.1	-0.376067	0.211027
0.15	-1.68106	0.379715
0.2	1.11382	0.515325
0.25	-0.0806307	0.272755
0.3	3.09033	0.157484
0.35	0.267057	0.180833
0.4	0.50645	0.207904
0.45	-1.34036	0.218332
0.5	-0.316847	0.249591
0.55	-1.65249	0.248194
0.6	-3.00723	0.201644
0.65	1.69523	0.177237
0.7	1.04498	0.128743
0.75	1.48974	0.188937
0.8	0.714625	0.22767
0.85	0.64671	0.204688
0.9	0.557017	-0.0914896
0.95	-4.25268	0.0169873

## Sheet: CGD
-10.7542	12.7164	2.92642	0.563268	7.75625	7.36079	2.65655	7.16004	7.4655	2.64634	4.26775	4.35142	0.556562	-1.57948	-5.02688	1.55323	7.05828	-2.90853	34.7764
-10.7542	12.7164	2.92642	0.563268	7.75625	7.36079	2.65655	7.16004	7.4655	2.64634	4.26775	4.35142	0.556562	-1.57948	-5.02688	1.55323	7.05828	-2.90853	34.7764
-10.7542	12.7164	2.92642	0.563268	7.75625	7.36079	2.65655	7.16004	7.4655	2.64634	4.26775	4.35142	0.556562	-1.57948	-5.02688	1.55323	7.05828	-2.90853	34.7764
-10.7542	12.7164	2.92642	0.563268	7.75625	7.36079	2.65655	7.16004	7.4655	2.64634	4.26775	4.35142	0.556562	-1.57948	-5.02688	1.55323	7.05828	-2.90853	34.7764
-10.7542	12.7164	2.92642	0.563268	7.75625	7.36079	2.65655	7.16004	7.4655	2.64634	4.26775	4.35142	0.556562	-1.57948	-5.02688	1.55323	7.05828	-2.90853	34.7764
-10.7542	12.7164	2.92642	0.563268	7.75625	7.36079	2.65655	7.16004	7.4655	2.64634	4.26775	4.35142	0.556562	-1.57948	-5.02688	-1.46903	7.05828	-2.90853	34.7764
-10.7542	12.7164	2.92642	0.563268	7.75625	7.36079	2.65655	7.16004	7.4655	2.64634	4.26775	4.35142	0.556562	-1.57948	-5.02688	-1.46903	7.05828	-2.90853	34.7764
-10.7542	12.7164	2.92642	0.563268	7.75625	7.36079	2.65655	7.16004	7.4655	2.64634	4.26775	4.35142	0.556562	-1.57948	-5.02688	-1.46903	7.05828	-2.90853	34.7764
-10.7542	12.7164	2.92642	0.563268	7.75625	7.36079	2.65655	7.16004	7.4655	2.64634	4.26775	4.35142	0.556562	-1.57948	-5.02688	-1.46903	7.05828	-2.90853	34.7764
-10.7542	12.7164	2.92642	0.563268	7.75625	7.36079	2.65655	7.16004	7.4655	2.64634	4.26775	4.35142	0.556562	-1.57948	-5.02688	-1.46903	7.05828	-2.90853	34.7764
-10.7542	12.7164	2.92642	0.563268	7.75625	7.36079	2.65655	7.16004	7.4655	2.64634	4.26775	4.35142	-0.951983	-1.57948	-5.02688	-1.46903	7.05828	-2.90853	34.7764
-10.7542	12.7164	2.92642	0.563268	7.75625	7.36079	2.65655	7.16004	7.4655	2.64634	4.26775	4.35142	-0.951983	-1.57948	-5.02688	-1.46903	7.05828	-2.90853	34.7764
-10.7542	12.7164	2.92642	0.563268	7.75625	7.36079	2.65655	7.16004	7.4655	2.64634	4.26775	4.35142	-0.951983	-1.57948	-5.02688	-1.46903	7.05828	-2.90853	34.7764
-10.7542	12.7164	2.92642	0.563268	7.75625	7.36079	2.65655	7.16004	7.4655	2.64634	4.26775	4.35142	-0.951983	-1.57948	-5.02688	-1.46903	7.05828	-2.90853	34.7764
-10.7542	12.7164	2.92642	-2.82133	7.75625	7.36079	2.65655	7.16004	7.4655	2.64634	4.26775	4.35142	-0.951983	-1.57948	-5.02688	-1.46903	7.05828	-2.90853	34.7764
-10.7542	12.7164	2.92642	-2.82133	7.75625	7.36079	2.65655	7.16004	7.4655	2.64634	4.26775	4.35142	-0.951983	-1.57948	-5.02688	-1.46903	7.05828	-2.90853	34.7764
-10.7542	12.7164	2.92642	-2.82133	7.75625	7.36079	2.65655	7.16004	7.4655	2.64634	4.26775	4.35142	-0.951983	-1.57948	-5.02688	-1.46903	7.05828	-2.90853	34.7764
-10.7542	12.7164	2.92642	-2.82133	7.75625	7.36079	2.65655	7.16004	7.4655	2.64634	4.26775	4.35142	-0.951983	-1.57948	-5.02688	-1.46903	7.05828	-2.90853	34.7764
-10.7542	12.7164	2.92642	-2.82133	7.75625	7.36079	2.65655	7.16004	7.4655	2.64634	4.26775	4.35142	-0.951983	-1.57948	-5.02688	-1.46903	7.05828	-2.90853	34.7764
	QQR	QR
0.05	4.39716	-10.7542
0.1	4.39716	12.7164
0.15	4.39716	2.92642
0.2	4.39716	-2.82133
0.25	4.39716	7.75625
0.3	4.2381	7.36079
0.35	4.2381	2.65655
0.4	4.2381	7.16004
0.45	4.2381	7.4655
0.5	4.2381	2.64634
0.55	4.1587	4.26775
0.6	4.1587	4.35142
0.65	4.1587	0.556562
0.7	4.1587	-1.57948
0.75	3.98056	-5.02688
0.8	3.98056	-1.46903
0.85	3.98056	7.05828
0.9	3.98056	-2.90853
0.95	3.98056	34.7764

## Sheet: OGAP
13.6094	8.40477	13.0209	14.3789	15.5653	14.0439	13.0329	13.53	14.3198	15.2083	16.5683	17.047	17.4105	16.2002	15.283	13.9997	17.5814	15.2743	11.592
13.6094	8.40477	13.0209	14.3789	15.5653	14.0439	13.0329	13.53	14.3198	15.2083	16.5683	17.047	17.4105	16.2002	15.283	13.9997	15.708	15.2743	11.592
13.6094	8.40477	13.0209	14.3789	15.5653	14.0439	13.0329	13.53	14.3198	15.2083	16.5683	17.047	17.0078	16.2002	15.283	13.9997	12.8313	15.2743	11.592
13.6094	8.40477	13.0209	14.3789	15.5653	14.0439	13.0329	13.53	14.3198	15.2083	16.5683	17.047	17.0078	16.2002	15.283	13.9997	12.8313	15.2743	11.592
13.6094	8.40477	13.0209	14.3789	15.5653	14.0439	13.0329	13.53	13.907	15.2083	16.5683	17.047	17.0078	16.2002	15.283	13.9997	12.8313	15.2743	11.592
13.6094	8.40477	13.0209	14.3789	15.5653	14.0439	13.0329	13.53	13.907	15.2083	16.5683	17.047	17.0078	16.2002	15.283	13.9997	12.8313	15.2743	11.592
13.6094	8.40477	13.0209	14.3789	15.5653	14.0439	13.0329	13.3384	13.907	15.2083	16.5683	17.047	17.0078	16.2002	15.283	13.9997	12.8313	15.2743	11.592
13.6094	8.40477	13.0209	14.3789	15.5653	14.0439	13.0329	13.3384	13.907	15.2083	16.5683	17.047	17.0078	16.2002	15.283	13.9997	12.8313	15.2743	11.592
13.6094	8.40477	13.0209	14.3789	15.5653	14.0439	13.0329	13.3384	13.907	15.2083	16.5683	17.047	16.9419	16.2002	15.283	13.9997	12.8313	15.2743	11.592
13.6094	8.40477	13.0209	14.3789	15.5653	14.0439	13.0329	13.3384	13.907	15.2083	16.5683	17.047	16.9419	16.1145	15.283	13.9997	12.8313	15.032	11.592
13.8966	8.40477	13.0209	14.3789	15.5653	14.0439	13.0329	13.3384	13.907	14.9676	16.5683	17.047	16.9419	16.1145	15.283	13.9997	12.8313	15.032	11.592
13.8966	8.40477	13.0209	14.3789	15.5653	14.0439	13.0329	13.3384	12.7087	14.9676	16.5683	17.047	16.9419	16.1145	15.283	13.9997	12.8313	15.032	11.592
13.8966	8.40477	13.0209	14.3789	15.5653	14.0439	13.0329	13.0801	12.7087	10.5637	16.5683	17.047	16.9419	16.1145	15.283	13.9997	12.8313	15.032	11.592
13.8966	8.40477	13.8481	14.3789	15.5653	14.0439	13.0329	13.0801	12.7087	10.5637	15.5168	17.047	16.9419	16.1145	15.283	13.9997	12.8313	15.032	11.592
13.8966	8.40477	13.8481	14.3789	15.5653	14.0439	13.0329	13.0801	12.7087	10.5637	15.5168	17.047	16.9419	16.1145	15.283	13.9997	12.8313	15.032	11.592
13.8966	20.5293	13.8481	14.3789	15.5653	14.0439	13.0329	13.0801	12.7087	10.5637	15.5168	17.047	16.9419	16.1145	15.283	13.9997	12.8313	15.032	11.592
13.8966	20.5293	13.8481	11.7654	15.5653	14.0439	13.0329	13.0801	12.7087	10.5637	15.5168	17.0459	16.9419	16.1145	15.283	13.9997	12.8313	15.032	11.592
13.8966	20.5293	13.8481	11.7654	15.5653	14.0439	13.0329	13.0801	12.7087	10.5637	9.83039	17.0459	16.9419	16.1145	15.283	13.9997	12.8313	15.032	11.592
13.8966	20.5293	13.8481	11.7654	15.5653	14.0439	13.0329	13.0801	12.047	10.5637	9.83039	17.0459	16.9419	16.1145	15.283	13.9997	12.8313	15.032	11.592
	QQR	QR
0.05	14.53	13.8966
0.1	14.4314	8.40477
0.15	14.2588	13.0209
0.2	14.2588	14.3789
0.25	14.2371	15.5653
0.3	14.2371	14.0439
0.35	14.227	13.0329
0.4	14.227	13.3384
0.45	14.2235	13.907
0.5	14.2063	15.2083
0.55	14.2087	16.5683
0.6	14.1457	17.047
0.65	13.9003	17.0078
0.7	13.8885	16.2002
0.75	13.8885	15.283
0.8	14.5266	13.9997
0.85	14.389	12.8313
0.9	14.0897	15.2743
0.95	14.0549	11.592
