# Supplementary material for: Macroeconomic Imbalances and Financial Stress Among BRICS: Analysis of Frequency-Dependent and Asymmetric Causal Nexuses
Source: publisher site journal article supplement (doi:10.1515/snde-2024-0045), 2025-04-16
Supplement: Supplementary file 71 [file IMF3.xlsx]

## Sheet: CA
0.0728793	0.0728793	0.0728793	0.0728793	0.0728793	0.0728793	0.0728793	0.0728793	0.0728793	0.0728793	0.0728793	0.0728793	0.0728793	0.0728793	0.0728793	0.0728793	0.0728793	0.0728793	0.0728793
0.0889646	0.0889646	0.0889646	0.0889646	0.0889646	0.0889646	0.0889646	0.0889646	0.0889646	0.0889646	0.0889646	0.0889646	0.0889646	0.0889646	0.0889646	0.0889646	0.0889646	0.0889646	0.0889646
-0.436589	-0.436589	-0.436589	-0.436589	-0.436589	-0.436589	-0.436589	-0.436589	-0.436589	-0.436589	-0.436589	-0.436589	-0.436589	-0.436589	-0.436589	-0.436589	-0.436589	-0.436589	-0.436589
-3.35186	-3.35186	-3.35186	-3.35186	-3.35186	-3.35186	-3.35186	-3.35186	-3.35186	-3.35186	-3.35186	-3.35186	-3.35186	-3.35186	1.49127	1.49127	1.49127	1.49127	1.49127
-2.21997	-2.59231	-2.59231	-2.59231	-2.59231	-2.59231	-2.59231	-2.59231	-2.25302	-2.91286	-2.91286	-2.91286	-2.91286	-2.91286	-2.91286	-1.33536	-1.33536	-1.33536	-0.0670343
0.332249	0.332249	0.871614	0.871614	0.871614	0.871614	0.871614	0.871614	0.871614	0.871614	0.871614	0.871614	0.871614	0.871614	0.871614	0.871614	0.871614	0.871614	0.2916
2.27146	2.27146	2.27146	2.27146	1.81338	1.81338	1.81338	1.81338	1.81338	1.81338	1.81338	1.81338	1.81338	1.81338	0.913543	0.913543	0.913543	0.913543	-3.04257
-2.37504	-2.37504	-7.1999	-2.22871	-1.01932	-1.01932	-0.724275	-0.724275	-0.430616	-0.430616	-0.430616	-0.430616	-0.300891	-0.300891	-0.300891	-0.300891	-0.287366	-0.113715	-0.113715
-1.04137	-1.04137	-1.04137	-0.754831	-0.936017	-0.936017	-0.936017	-1.00909	-0.490267	-0.490267	-0.490267	-0.66484	-0.603106	-0.4505	-0.4505	-0.4505	-0.419629	-0.443277	-0.176984
3.1932	3.1932	0.110655	-0.702544	1.67348	1.67348	1.1241	-0.748949	-0.748949	-0.748949	0.0925471	-0.855083	-0.855083	-0.855083	-0.542933	-0.542933	-0.542933	-0.905338	-0.905338
-0.910639	-0.910639	-0.910639	-0.630599	-0.630599	0.0191997	-1.09191	-1.09191	0.727231	0.238428	-1.78029	-1.78029	-0.059225	-0.059225	-1.47069	-0.0618234	-0.260288	-0.260288	-0.260288
1.3723	-0.827336	-0.827336	-1.82202	-1.82202	-1.82202	-0.683169	-1.03536	-1.33711	-1.33711	-1.33711	-1.33711	-1.33711	-1.33711	-1.33711	-1.33711	-1.33711	-1.33711	-1.33711
3.37586	3.37586	3.37586	3.37586	3.37586	3.37586	3.37586	3.37586	3.37586	2.146	2.146	2.146	2.146	2.146	2.146	2.146	2.146	2.146	2.146
0.20271	0.20271	0.20271	0.20271	0.20271	2.97745	2.97745	3.87428	0.984333	0.984333	0.984333	0.984333	0.984333	1.05593	1.05593	1.05593	1.05593	1.05593	1.05593
0.2422	0.2422	0.2422	0.2422	0.2422	0.2422	0.2422	0.2422	0.2422	0.2422	0.2422	0.2422	0.2422	0.2422	0.2422	0.2422	0.2422	0.2422	0.682117
-0.0418431	-0.0418431	-0.0418431	-0.0418431	-0.0418431	-0.0418431	-0.0418431	-0.0418431	-0.0418431	-0.0418431	-0.0418431	-0.0418431	-0.0418431	-0.0418431	-0.0418431	-0.0418431	-0.0418431	-0.0418431	-0.0418431
0.0278807	0.0278807	0.0278807	0.0278807	0.0278807	0.0278807	0.0278807	0.0278807	0.0278807	0.0278807	0.0278807	0.0278807	0.0278807	0.0278807	0.0278807	0.0278807	0.0278807	0.0278807	0.0278807
0.0275331	0.0275331	0.0275331	0.0275331	0.0275331	0.0275331	0.0275331	0.0275331	0.0275331	0.0275331	0.0275331	0.0275331	0.0275331	0.0275331	0.0275331	0.0275331	0.0275331	0.0275331	0.0275331
0.0138586	0.0138586	0.0138586	0.0138586	0.0138586	0.0138586	0.0138586	0.0138586	0.0138586	0.0138586	0.0138586	0.0138586	0.0138586	0.0138586	0.0138586	0.0138586	0.0138586	0.0138586	0.0138586
	QQR	QR
0.05	0.0728793	-0.121208
0.1	0.0889646	0.0101957
0.15	-0.436589	0.0449817
0.2	-2.07735	0.0428518
0.25	-2.32471	0.00216779
0.3	0.784312	-0.0193073
0.35	1.4648	-0.0416753
0.4	-1.11088	-0.0401213
0.45	-0.675063	-0.0156536
0.5	0.110872	-0.0138154
0.55	-0.588657	-0.0154536
0.6	-1.16712	-0.0148927
0.65	2.72856	-0.0145096
0.7	1.16316	-0.0258837
0.75	0.265354	-0.0336079
0.8	-0.0418431	-0.0214978
0.85	0.0278807	-0.00895602
0.9	0.0275331	0.0211485
0.95	0.0138586	-0.0191846

## Sheet: CGD
-6.40292	-2.97685	-3.67214	-7.4343	-5.16563	-0.372337	0.685814	4.46106	2.67872	3.04202	0.604768	-2.23589	-2.5661	-2.98017	-2.86342	-2.85072	-7.68849	-8.36983	-10.5586
-6.40292	-2.97685	-3.67214	-7.4343	-5.16563	-0.322117	0.685814	4.46106	2.67872	3.04202	1.90016	-0.512855	-2.5661	-2.98017	-2.86342	-2.85072	-7.68849	-8.36983	-10.5586
-6.40292	-2.52115	-3.67214	-7.4343	-4.69833	-0.322117	0.685814	5.58496	3.198	3.04202	1.90016	-0.210818	-2.5661	-2.98017	-2.63108	-2.45444	-7.68849	-8.36983	-9.41479
-6.40292	-2.52115	-3.67214	-7.4343	-4.69833	-0.322117	0.685814	5.58496	3.198	3.04202	1.90016	-0.210818	-2.30855	-2.98017	-2.63108	-2.45444	-7.68849	-8.36983	-9.41479
-6.40292	-2.52115	-2.54086	-7.4343	-3.8523	-0.322117	0.685814	5.58496	3.32932	3.05299	1.90016	-0.210818	-2.30855	-2.81151	-2.63108	-2.45444	-7.48424	-8.36983	-9.41479
-6.40292	-2.52115	-2.54086	-7.4343	-3.8523	0.867289	0.685814	5.58496	3.32932	3.05299	1.92464	-0.210818	-2.30855	-2.81151	-2.63108	-2.45444	-7.48424	-8.36983	-9.41479
-6.40292	-2.52115	-2.54086	-6.95475	-3.36302	0.867289	4.29679	5.58496	3.32932	3.05299	1.92464	-0.210818	-2.30855	-2.81151	-2.63108	-2.45444	-7.48424	-8.36983	-9.41479
-6.40292	-2.52115	-2.54086	-6.95475	-3.02532	0.867289	4.29679	5.58496	3.32932	3.05299	1.92464	-0.210818	-2.30855	-2.38691	-2.63108	-2.45444	-7.48424	-8.36983	-9.41479
-6.40292	-2.52115	-2.54086	-6.95475	-3.02532	1.67783	4.29679	5.58496	3.32932	3.05299	1.92464	0.189942	-2.30855	-2.38691	-2.63108	-2.45444	-7.48424	-8.36983	-9.41479
-6.40292	-2.52115	-1.7836	-6.95475	-3.02532	1.67783	6.31822	5.58496	3.32932	3.05299	1.92464	0.189942	-2.30855	-2.38691	-2.63108	-2.45444	-7.48424	-8.36983	-9.41479
-6.40292	-2.52115	-1.7836	-6.95475	-2.88829	1.67783	6.31822	5.58496	3.32932	3.05299	1.92464	0.204235	-2.30855	-2.38691	-2.37011	-2.45444	-7.20232	-8.36983	-9.41479
-6.40292	-2.52115	-1.7836	-6.95475	-2.88829	1.67783	6.31822	5.58496	3.32932	3.06204	3.22726	0.204235	-1.45889	-2.38691	-2.37011	-2.45444	-6.88252	-8.36983	-9.41479
-6.40292	-2.52115	-1.7836	-6.95475	-2.70426	2.27181	6.31822	5.58496	3.32932	3.06204	3.22726	0.204235	-1.45889	-2.38691	-2.27017	-2.45444	-6.88252	-8.36983	-9.41479
-6.40292	-2.52115	-1.7836	-6.95475	-2.70426	2.27181	6.31822	5.58496	3.32932	3.06204	3.32396	0.204235	-1.45889	-2.38691	-2.27017	-2.45444	-6.88252	-8.36983	-9.41479
-6.40292	-2.52115	-1.7836	-6.95475	-2.70426	2.27181	6.31822	5.58496	3.32932	3.06204	3.32396	0.204235	-1.45889	-2.38691	-2.27017	-2.45444	-6.88252	-8.36983	-9.41479
-6.40292	-2.52115	-1.7836	-6.95475	-1.27601	2.27181	7.31907	5.58496	3.32932	3.06204	3.32396	0.204235	-1.45889	-1.48398	-2.27017	-2.32633	-6.88252	-8.36983	-9.41479
-6.40292	-2.52115	-1.7836	-6.95475	-1.27601	2.27181	7.31907	5.58496	5.08787	3.06204	3.32396	0.204235	-1.45889	-1.48398	-2.27017	-2.32633	-6.88252	-8.36983	-9.41479
-6.40292	-2.52115	-1.7836	-6.95475	3.68931	2.27181	7.31907	5.58496	5.09248	3.06204	3.32396	0.204235	-1.45889	-1.48398	-2.27017	-2.32633	-6.88252	-8.36983	-9.41479
-6.40292	-2.52115	-1.7836	-6.95475	3.68931	2.27181	7.31907	5.58496	5.42221	3.06204	3.32396	0.204235	-1.45889	-1.41484	-2.27017	-2.32633	-6.40164	-8.36983	-9.41479
	QQR	QR
0.05	-2.87711	-6.40292
0.1	-2.7156	-2.52115
0.15	-2.47135	-2.54086
0.2	-2.4578	-6.95475
0.25	-2.32661	-3.02532
0.3	-2.26272	1.67783
0.35	-2.02168	4.29679
0.4	-1.98156	5.58496
0.45	-1.91781	3.32932
0.5	-1.77156	3.04202
0.55	-1.73502	1.90016
0.6	-1.60444	-0.210818
0.65	-1.55823	-2.30855
0.7	-1.55314	-2.38691
0.75	-1.55314	-2.63108
0.8	-1.37103	-2.45444
0.85	-1.27847	-7.48424
0.9	-1.0169	-8.36983
0.95	-0.970596	-9.41479

## Sheet: OGAP
29.8584	19.9686	8.43085	11.7235	9.33782	12.0067	17.1843	20.6321	24.9087	10.1963	11.2265	11.0273	15.2962	15.8707	18.3393	23.8257	31.8725	33.9981	28.0571
29.8584	19.9686	8.43085	11.7235	9.33782	12.0067	17.1843	20.6321	24.9087	10.1963	11.2265	11.0273	15.2962	15.8707	18.3393	23.8257	31.8725	33.9981	28.0571
29.8584	19.9686	8.43085	11.7235	9.33782	12.0067	17.1843	20.6321	24.9087	10.1963	11.2265	11.0273	15.2962	15.8707	18.3393	23.8257	31.8725	33.9981	28.0571
29.8584	19.9686	8.43085	11.7235	9.33782	12.0067	17.1843	20.6321	24.9087	10.1963	11.2265	11.0273	15.2962	15.8707	18.3393	23.8257	31.8725	33.9981	28.0571
29.8584	19.9686	8.43085	11.7235	9.33782	12.0067	17.1843	20.6321	24.9087	10.1963	11.2265	11.0273	15.2962	15.8707	18.3393	23.8257	31.8725	33.9981	28.0571
29.8584	19.9686	8.43085	11.7235	9.33782	12.0067	17.1843	20.6321	24.9087	10.1963	11.2265	11.0273	15.2962	15.8707	18.3393	23.8257	31.8725	33.9981	28.0571
29.8584	19.9686	8.43085	11.7235	9.33782	12.0067	17.1843	20.6321	24.9087	10.1963	11.2265	11.0273	15.2962	15.8707	18.3393	23.8257	31.8725	33.9981	28.0571
29.8584	19.9686	8.43085	11.7235	9.33782	12.0067	17.1843	20.6321	24.9087	10.1963	11.2265	11.0273	15.2962	15.8707	18.3393	23.8257	31.8725	33.9981	28.0571
29.8584	19.9686	8.43085	11.7235	9.33782	12.0067	17.1843	20.6321	24.9087	10.1963	11.2265	11.0273	15.2962	15.8707	18.3393	23.8257	31.8725	33.9981	28.0571
29.8584	19.9686	8.43085	11.7235	9.33782	12.0067	17.1843	20.6321	24.9087	10.1963	11.2265	11.0273	15.2962	15.8707	18.3393	23.8257	31.8725	33.9981	28.0571
29.8584	19.9686	8.43085	11.7235	9.33782	12.0067	17.1843	20.6321	24.9087	10.1963	11.2265	11.0273	15.2962	15.8707	18.3393	23.8257	31.8725	33.9981	28.0571
29.8584	19.9686	8.43085	11.7235	9.33782	12.0067	17.1843	20.6321	24.9087	10.1963	11.2265	11.0273	15.2962	15.8707	18.3393	23.8257	31.8725	33.9981	28.0571
29.8584	19.9686	8.43085	11.7235	9.33782	12.0067	17.1843	20.6321	24.9087	10.1963	11.2265	11.0273	15.2962	15.8707	18.3393	23.8257	31.8725	33.9981	28.0571
29.8584	19.9686	8.43085	11.7235	9.33782	12.0067	17.1843	20.6321	24.9087	10.1963	11.2265	11.0273	15.2962	15.8707	18.3393	23.8257	31.8725	33.9981	28.0571
29.8584	19.9686	8.43085	11.7235	9.33782	12.0067	17.1843	20.6321	24.9087	10.1963	11.2265	11.0273	15.2962	15.8707	18.3393	23.8257	31.8725	33.9981	28.0571
29.8584	19.9686	8.43085	11.7235	9.33782	12.0067	17.1843	20.6321	24.9087	10.1963	11.2265	11.0273	15.2962	15.8707	18.3393	23.8257	31.8725	33.9981	28.0571
29.8584	19.9686	8.43085	11.7235	9.33782	12.0067	17.1843	20.6321	24.9087	10.1963	11.2265	11.0273	15.2962	15.8707	18.3393	23.8257	31.8725	33.9981	28.0571
29.8584	19.9686	8.43085	11.7235	9.33782	12.0067	17.1843	20.6321	24.9087	10.1963	11.2265	11.0273	15.2962	15.8707	18.3393	23.8257	31.8725	33.9981	28.0571
29.8584	19.9686	8.43085	11.7235	9.33782	12.0067	17.1843	20.4117	24.9087	10.1963	11.2265	11.0273	15.2962	15.8707	18.3393	23.8257	31.8725	33.9981	28.0571
	QQR	QR
0.05	18.619	29.8584
0.1	18.619	19.9686
0.15	18.619	8.43085
0.2	18.619	11.7235
0.25	18.619	9.33782
0.3	18.619	12.0067
0.35	18.619	17.1843
0.4	18.619	20.6321
0.45	18.619	24.9087
0.5	18.619	10.1963
0.55	18.619	11.2265
0.6	18.619	11.0273
0.65	18.619	15.2962
0.7	18.619	15.8707
0.75	18.619	18.3393
0.8	18.619	23.8257
0.85	18.619	31.8725
0.9	18.619	33.9981
0.95	18.6074	28.0571
