# Supplementary material for: Macroeconomic Imbalances and Financial Stress Among BRICS: Analysis of Frequency-Dependent and Asymmetric Causal Nexuses
Source: publisher site journal article supplement (doi:10.1515/snde-2024-0045), 2025-04-16
Supplement: Supplementary file 72 [file IMF4.xlsx]

## Sheet: CA
-4.29024	-3.83523	-1.93684	-1.93684	-1.93684	-1.93684	-1.93684	-1.93684	-1.55675	-1.55675	-2.1716	-1.82172	0.590305	1.08482	1.08482	1.08482	1.08482	1.08482	1.08482
1.26595	1.24244	1.04727	1.17121	1.4399	1.23178	1.23786	1.59089	1.59089	1.80707	1.80707	3.36821	-0.938568	-1.19838	0.408812	1.1197	1.1197	0.0819467	0.406853
-0.854339	-1.10537	0.723698	0.77147	0.898069	0.898069	0.898069	1.99137	3.25612	3.03495	5.02729	5.02729	4.56883	5.1269	5.13988	5.14829	5.92872	5.61744	5.53047
-1.54944	-8.47997	-8.47997	0.597941	-1.59916	-3.56101	-3.56101	-3.56101	-0.610867	-0.379453	-0.379453	-0.450486	-0.381656	-0.118794	-0.183755	-0.183755	-0.183755	-0.110209	-0.110209
-12.5016	-12.5016	-12.5016	-12.5016	-12.5016	-12.5016	-12.5016	0.49822	-1.08398	-0.228929	-0.311756	4.39807	4.39807	4.39807	4.39807	-0.295664	-0.295664	-0.295664	-0.295664
-16.6491	-16.6491	-16.6491	-16.6491	-16.6491	-16.6491	-16.6491	3.55291	3.55291	3.55291	3.55291	3.55291	8.26208	4.71715	4.71715	4.71715	4.71715	4.71715	-0.293265
-17.2219	-17.2219	-17.2219	-17.2219	-17.2219	-11.8249	-11.8249	-11.8249	-0.0986096	-0.0986096	-4.97853	-4.97853	-4.97853	-4.97853	-4.97853	-4.97853	-4.97853	-5.93059	-0.31127
-0.232228	-7.62769	-7.62769	-7.62769	-7.62769	0.531336	-1.64026	-6.31186	-6.31186	-6.31186	-6.31186	-5.90545	-5.90545	-5.90545	-5.90545	-5.90545	-5.90545	-5.90545	-5.90545
0.0541108	-6.48924	-6.48924	-2.67375	-2.67375	-2.67375	-2.67375	-2.67375	-2.67375	-2.67375	-2.67375	-2.67375	-5.65274	-5.65274	-5.65274	-5.65274	-5.65274	-5.65274	-5.65274
0.344538	4.82575	5.85068	-1.7119	-0.697335	0.943368	0.943368	0.943368	0.943368	0.943368	0.943368	1.73925	8.88242	8.88242	8.88242	8.88242	8.88242	8.88242	8.88242
0.633094	3.52955	7.82088	7.82088	18.4421	18.4421	14.0532	14.0532	14.0532	14.0532	14.0532	14.0532	14.0532	7.44012	7.44012	7.44012	7.44012	7.44012	7.44012
0.940486	0.940486	9.17491	9.17491	9.17491	9.17491	9.17491	3.18719	3.18719	3.18719	3.18719	-4.51472	-4.51472	-4.51472	3.06812	3.06812	3.06812	3.06812	-0.687765
1.31146	1.31146	1.31146	1.55069	3.44357	3.44357	3.44357	3.9789	3.9789	3.9789	-0.240679	2.26706	-0.0744296	-1.66581	-0.952733	-0.952733	-0.952733	-0.952733	-0.952733
1.05405	0.837734	0.837734	0.837734	0.837734	0.837734	-0.351063	0.437915	0.437915	0.0942386	1.16368	-2.06243	-2.06243	-2.51178	-2.51178	-2.51178	-2.51178	-2.51178	-2.51178
-0.511822	-0.511822	-0.511822	-0.511822	-0.642258	-0.610874	-0.610874	-0.610874	-0.776993	-1.25721	-2.57755	-2.01008	4.06937	4.06937	4.06937	1.6548	1.6548	1.6548	1.6548
-0.531775	-0.531775	-0.531775	-0.531775	-0.531775	-0.531775	-0.530009	-0.530009	-0.530009	-0.530009	-0.530009	-0.582535	-0.582535	-0.582535	-0.494888	-0.494888	-0.494888	4.60539	3.77142
3.07612	-0.0941718	-0.0941718	-0.0941718	-0.0941718	-0.0941718	-0.0941718	-0.0941718	-0.0941718	-0.0941718	-0.0941718	-0.0941718	-0.0941718	-0.0941718	-0.0941718	-0.0941718	-0.0941718	-0.0941718	-0.0941718
-1.62201	-1.62201	-1.62201	-1.62201	-1.62201	-1.62201	-1.62201	-1.62201	-1.62201	-1.62201	-1.62201	-1.62201	-1.62201	-0.593375	-0.220314	-0.220314	-0.220314	-0.220314	-0.220314
0.461278	0.461278	0.461278	0.461278	0.461278	0.461278	0.461278	0.461278	0.784207	-0.583166	-0.583166	-0.583166	-0.583166	-0.583166	-0.583166	-0.583166	-0.583166	-0.583166	-0.583166
	QQR	QR
0.05	-1.03969	-0.213341
0.1	1.04214	-0.183253
0.15	3.03301	-0.035989
0.2	-1.7519	-0.0424269
0.25	-3.80148	-0.0589412
0.3	-3.53813	-0.0643089
0.35	-8.57226	-0.0599438
0.4	-5.49173	-0.0417022
0.45	-4.02933	-0.0450594
0.5	4.11517	0.0312911
0.55	10.5106	-0.00697023
0.6	3.08131	-0.00837059
0.65	1.225	-0.00287487
0.7	-0.640532	-0.00896731
0.75	0.404384	-0.0961555
0.8	-0.0366398	-0.14568
0.85	0.0726859	-0.384063
0.9	-1.199	-0.384129
0.95	-0.071433	-0.392872

## Sheet: CGD
-25.4358	-24.1906	-23.8559	-23.8559	-23.2967	-20.3042	-17.8955	-16.4073	-16.1212	-15.9732	-16.0846	-14.6844	-14.4074	-13.3539	-12.0865	-10.6086	-8.08387	-5.88926	-3.24919
-23.0378	-21.4882	-21.0143	-20.2632	-17.9221	-16.7047	-15.3323	-13.6902	-13.6521	-12.9174	-13.262	-11.7914	-11.2891	-9.83307	-9.59303	-7.4695	-5.63555	-4.01424	-2.4305
-18.2775	-17.9718	-17.3438	-16.4114	-13.5935	-9.65843	-11.2327	-10.9117	-10.2472	-9.33984	-9.4734	-8.51135	-7.67338	-6.58182	-5.62896	-4.84212	-3.52997	-2.45808	-1.03853
-10.3899	-9.83449	-6.17289	-5.67925	-5.19542	-4.73239	-4.49127	-4.45896	-4.27643	-4.28491	-4.12952	-4.0476	-3.05297	-2.71063	-2.37648	-2.66082	-1.85816	-2.04783	0.0467265
5.56688	5.0139	4.14734	3.30735	2.3866	1.97513	1.25403	0.881818	1.06363	-0.354285	0.503024	0.103325	0.255061	-0.205446	-0.468962	-0.581859	-1.28546	0.104751	1.89748
5.6993	5.29256	4.95984	5.84313	5.11402	4.88714	4.56623	4.93325	3.98659	3.57717	3.95064	3.18585	3.29939	2.81301	1.48269	0.931096	0.143686	1.27989	2.6659
5.6993	5.29256	5.18154	5.84313	5.8544	6.11172	7.1248	7.4255	6.76677	6.97348	7.00122	5.72862	6.07799	4.83648	3.6988	3.63667	5.371	4.96356	3.53742
5.69154	5.29256	4.95984	4.42857	4.20153	6.11172	7.1248	7.88711	8.4339	8.75071	9.05252	8.10149	8.18138	6.56394	9.75112	9.25074	8.18954	6.8246	4.76374
5.62361	5.27909	4.50204	4.13289	3.88672	4.63464	5.6631	7.4255	8.4339	8.75071	9.08072	9.74723	10.0993	12.082	11.3877	10.5445	9.44226	8.24424	6.73219
5.61665	5.1437	4.38712	3.38864	3.13022	3.31442	3.99377	5.07266	6.2909	8.08488	9.08072	10.7709	11.9978	12.3528	11.579	10.7611	9.92119	9.45005	7.13723
5.61665	4.23589	3.16877	2.26909	2.6138	3.10626	3.03302	3.02825	2.67116	5.01176	7.02266	9.74723	13.4104	12.6236	11.579	10.0961	9.92119	9.45005	8.30956
5.47619	3.77684	3.16877	2.26909	2.53843	2.96659	2.22078	2.15767	1.82158	1.75894	1.28251	6.07799	13.4104	12.1855	10.5656	10.0961	8.48452	8.05655	7.13723
5.61665	5.1437	4.38712	2.85224	2.6138	2.98689	2.22078	1.82478	1.4652	1.24138	1.03208	0.843176	4.81133	10.8545	9.25074	7.83868	7.33661	6.9703	6.23766
5.81417	5.70371	5.31113	4.85448	3.80715	3.28482	2.77755	2.0259	1.4652	1.24138	0.991372	0.629757	0.526016	7.88219	6.47526	5.96931	5.86737	5.65067	5.52572
5.96005	6.04669	5.71833	5.24627	4.9755	4.30808	3.59306	2.86464	1.59954	1.24138	0.735559	0.360814	0.0408124	-3.92748	-6.6963	3.66232	4.48273	4.38466	4.32856
5.96005	6.04669	5.71833	5.56189	4.9755	4.30808	3.59306	2.86464	2.40716	1.24138	0.735559	0.360814	-2.14072	-5.94979	-7.65598	-9.44176	-10.2873	-11.6228	-12.0017
5.96005	6.04669	5.71833	5.56189	4.9755	4.7066	4.60085	3.72564	2.63806	1.27423	0.783629	0.337603	-3.16969	-6.88541	-8.73125	-9.54172	-11.2034	-11.9694	-12.0017
5.96005	6.04669	5.71833	5.56189	4.9755	4.7066	4.60085	3.72564	2.63806	1.66089	0.783629	0.337603	-4.11284	-6.88541	-8.73125	-10.423	-11.2034	-11.9694	-12.0017
5.81417	5.82955	5.41376	5.34649	4.9755	4.30808	4.60085	3.72564	2.63806	1.66089	1.16029	0.337603	-3.16969	-6.88541	-9.62917	-10.423	-11.8012	-11.9694	-12.0017
	QQR	QR
0.05	-16.0939	5.62361
0.1	-13.2284	5.16932
0.15	-9.7224	4.71699
0.2	-4.33438	3.96547
0.25	1.34549	3.27118
0.3	3.61112	3.1872
0.35	5.63816	2.99559
0.4	7.02954	2.53581
0.45	7.66801	2.07401
0.5	7.44599	1.81421
0.55	6.67971	1.28233
0.6	5.55007	1.03208
0.65	4.50146	0.67707
0.7	3.98964	0.533389
0.75	2.57501	-0.0105161
0.8	-0.80668	1.27989
0.85	-0.903869	3.52828
0.9	-0.979542	3.13557
0.95	-1.05625	2.9268

## Sheet: OGAP
56.0629	30.762	6.53812	2.03152	-1.20341	-11.8289	-19.3089	-21.0206	-19.4525	-18.3273	-12.6907	-12.8534	-1.37877	8.36777	18.8946	28.5161	72.1943	83.3692	84.6226
56.0629	30.762	6.53812	2.03152	-1.20341	-11.8289	-19.3089	-21.0206	-19.4525	-18.3728	-12.6907	-12.8534	-1.86326	8.36777	18.8946	27.1149	72.1943	83.3692	84.6226
56.0629	30.762	6.53812	2.03152	-1.20341	-11.8289	-19.3089	-21.0206	-19.4525	-18.3728	-12.6907	-12.8534	-1.86326	8.36777	18.8946	27.1149	72.1943	83.3692	84.6226
56.0629	30.762	6.53812	2.03152	-1.20341	-11.8289	-19.3089	-21.0206	-19.4525	-18.3728	-12.6907	-12.8534	-1.86326	8.36777	18.8946	27.1149	72.1943	83.3692	84.6226
56.0629	30.762	6.89355	2.03152	-1.20341	-11.8289	-19.3089	-21.0206	-19.4525	-18.3728	-12.6907	-12.8534	-1.86326	8.36777	18.8946	27.1149	72.1943	83.3692	84.6226
56.0629	30.762	6.89355	2.03152	-1.20341	-11.8289	-19.3089	-21.0206	-19.4525	-18.3728	-12.6907	-12.8534	-1.86326	8.36777	18.8946	27.1149	72.1943	83.3692	84.6226
56.0629	30.762	6.89355	2.03152	-1.20341	-11.8289	-19.3089	-21.0206	-19.4525	-18.3728	-12.6907	-12.8534	-1.86326	8.36777	18.8946	27.1149	72.1943	83.3692	84.6226
56.0629	30.762	6.89355	2.03152	-1.20341	-11.8289	-19.3089	-21.0206	-19.4525	-18.3728	-12.6907	-12.8534	-1.86326	8.36777	18.8946	27.1149	72.1943	83.3692	84.6226
56.0629	30.762	6.89355	2.03152	-1.20341	-11.8289	-19.3089	-21.0206	-19.4525	-18.3728	-12.6907	-12.8534	-1.86326	8.36777	18.8946	27.1149	72.1943	83.3692	84.6226
56.0629	30.762	6.89355	2.03152	-1.20341	-11.8289	-19.3089	-21.0206	-19.4525	-18.3728	-14.1266	-12.8534	-1.86326	8.36777	18.8946	27.1149	72.1943	83.3692	84.6226
56.0629	30.762	6.89355	2.03152	-1.20341	-11.8289	-19.3089	-21.0206	-19.4525	-18.3728	-14.1266	-12.9482	-1.86326	8.36777	18.8946	27.1149	72.1943	83.3692	84.6226
56.0629	30.762	6.89355	2.03152	-1.20341	-11.8289	-19.3089	-21.0206	-19.4525	-18.3728	-14.1266	-12.9482	-1.86326	8.36777	18.8946	27.1149	72.1943	83.3692	84.6226
56.0629	30.762	6.89355	2.03152	-1.20341	-11.8289	-19.3089	-21.0206	-19.4525	-18.3728	-14.1266	-12.9482	-1.86326	8.36777	18.8946	27.1149	72.1943	83.3692	84.6226
56.0629	30.762	6.89355	2.03152	-1.20341	-11.8289	-19.3089	-21.0206	-19.4525	-18.3728	-14.1266	-12.9482	-1.86326	8.36777	18.8946	27.1149	72.1943	83.3692	84.6226
56.0629	30.762	6.89355	2.03152	-1.20341	-11.8289	-19.3089	-21.0206	-19.4525	-18.3728	-14.1266	-12.9482	-4.83445	8.36777	18.8946	27.1149	72.1943	83.3692	84.6226
56.0629	30.762	6.89355	2.03152	-1.20341	-11.8289	-19.3089	-21.0206	-19.4525	-18.3728	-14.1266	-12.9482	-4.83445	5.15139	18.8946	27.1149	72.1943	83.3692	84.6226
56.0629	30.762	6.89355	2.03152	-1.20341	-11.8289	-19.3089	-21.0206	-19.4525	-18.3728	-14.1266	-12.9482	-4.83445	5.15139	18.8946	27.1149	72.1943	83.3692	84.6226
56.0629	30.762	6.89355	2.03152	-1.20341	-11.8289	-19.3089	-21.0206	-19.4525	-18.3728	-14.1266	-12.9482	-4.83445	5.15139	18.8946	27.1149	72.1943	83.3692	84.6226
56.0629	30.762	6.89355	2.03152	-1.20341	-11.8289	-19.3089	-21.0206	-19.4525	-18.3728	-14.1266	-12.9482	-4.83445	5.15139	18.8946	27.1149	72.1943	83.3692	84.6226
	QQR	QR
0.05	14.3839	56.0629
0.1	14.2823	30.762
0.15	14.2823	6.89355
0.2	14.2823	2.03152
0.25	14.301	-1.20341
0.3	14.301	-11.8289
0.35	14.301	-19.3089
0.4	14.301	-21.0206
0.45	14.301	-19.4525
0.5	14.2254	-18.3728
0.55	14.2204	-14.1266
0.6	14.2204	-12.9482
0.65	14.2204	-1.86326
0.7	14.2204	8.36777
0.75	14.0641	18.8946
0.8	13.8948	27.1149
0.85	13.8948	72.1943
0.9	13.8948	83.3692
0.95	13.8948	84.6226
