# Supplementary material for: Macroeconomic Imbalances and Financial Stress Among BRICS: Analysis of Frequency-Dependent and Asymmetric Causal Nexuses
Source: publisher site journal article supplement (doi:10.1515/snde-2024-0045), 2025-04-16
Supplement: Supplementary file 73 [file Residual.xlsx]

## Sheet: CA
-0.416825	-0.137478	-0.0916729	-0.0702613	-0.05908	-0.0502356	-0.0440149	-0.0396632	-0.036653	-0.0355625	-0.0341145	-0.0336404	-0.0338007	-0.0350473	-0.0379151	-0.045478	-0.0774304	0.0813229	0.243246
-0.416825	-0.137478	-0.0916729	-0.0702613	-0.05908	-0.0502356	-0.0440149	-0.0396632	-0.036653	-0.0355625	-0.0341145	-0.0336404	-0.0338007	-0.0350473	-0.0379151	-0.0434157	-0.0694287	0.0813229	0.243246
-0.499251	-0.137478	-0.0916729	-0.0702613	-0.05908	-0.0502356	-0.0440149	-0.0396632	-0.036653	-0.0355625	-0.0341145	-0.0336404	-0.0338007	-0.0350473	-0.0379151	-0.0434157	-0.0694287	0.0813229	0.243246
-0.499251	-0.137478	-0.0916729	-0.0702613	-0.05908	-0.0502356	-0.0440149	-0.0396632	-0.036653	-0.0355625	-0.0341145	-0.0336404	-0.0338007	-0.0350473	-0.0379151	-0.0434157	-0.0694287	0.0813229	0.243246
-0.417178	-0.137478	-0.0916729	-0.0702613	-0.05908	-0.0502356	-0.0440149	-0.0396632	-0.036653	-0.0355625	-0.0341145	-0.0336404	-0.0338007	-0.0350473	-0.0379151	-0.0434157	-0.0694287	0.0813229	0.243246
-0.417178	-0.146007	-0.0916729	-0.0702613	-0.05908	-0.0502356	-0.0440149	-0.0396632	-0.036653	-2.44206	-0.0341145	6.14495	-5.56384	-0.0350473	-0.0379151	-0.0434157	-0.0694287	0.0813229	0.197551
-0.499939	-0.146007	-0.0959441	-0.0702613	-0.05908	-0.0502356	-0.0440149	-0.0396632	-0.036653	-2.44206	4.25645	6.14495	-5.56384	-0.0350473	-0.0379151	-0.0434157	-0.0774594	0.0813229	0.197551
-0.417844	-0.146007	-0.0959441	-0.0702613	-0.05908	-0.0502356	-1.46385	-0.0396632	-0.036653	-2.44206	4.25645	6.14495	-5.56384	-0.0362346	-0.0379151	-0.0434157	-0.0774594	0.0813229	0.197551
-0.417844	-0.137501	-0.0959441	-0.073375	-0.05908	-3.93007	-3.42062	-1.39068	-0.036653	-2.44206	4.25645	6.14495	-5.56384	-5.14796	-0.0379151	-0.0434157	-0.0774594	0.0813229	0.197551
-0.418828	-0.146046	-0.0916007	-0.0701756	-0.956991	-3.93007	-3.42062	0.0557224	0.0540755	-16.086	4.25645	6.14495	-5.56384	-5.14796	-5.49535	-0.0477796	-0.0774594	0.0813229	0.197551
0.416748	0.146403	0.0995984	0.0800798	0.0691468	-1.50022	-3.42062	0.0557224	0.0536011	-2.32592	4.25645	6.14495	-5.56384	-5.14796	0.0533875	0.0562216	-0.0774594	0.0813229	0.197551
0.416748	0.146353	0.0995984	0.0827856	0.0691468	0.0631258	0.0588101	0.0557224	0.0536011	0.0521841	4.25645	0.0511238	-2.10467	0.0517855	0.0533875	0.0562216	-2.88295	0.0813229	0.197551
0.501274	0.146353	0.0995984	0.0827856	0.0691468	0.0631258	0.0588101	0.0557224	0.0536011	0.0521841	0.0516912	0.0511238	0.0511284	0.0517855	0.0533875	0.0562216	0.0607793	0.0773149	0.242111
0.416338	0.146353	0.10377	0.0827856	0.0691468	0.0631258	0.0588101	0.0557224	0.0536011	0.0521841	0.0516912	0.0511238	0.0511284	0.0517855	0.0533875	0.0562216	0.0607793	0.0773149	0.242111
0.416338	0.146353	0.10377	0.0827856	0.0691468	0.0631258	0.0588101	0.0557224	0.0536011	0.0521841	0.0516912	0.0511238	0.0511284	0.0517855	0.0533875	0.0562216	0.0607793	0.0773149	0.196486
0.50095	0.138256	0.10377	0.0827856	0.0691468	0.0631258	0.0588101	0.0557224	0.0536011	0.0521841	0.0516912	0.0511238	0.0511284	0.0517855	0.0533875	0.0562216	0.0607793	0.0773149	0.196486
0.50095	0.138256	0.10377	0.0827856	0.0691468	0.0631258	0.0588101	0.0557224	0.0536011	0.0521841	0.0516912	0.0511238	0.0511284	0.0517855	0.0533875	0.0562216	0.0607793	0.0773149	0.196486
0.416089	0.138256	0.10377	0.0827856	0.0691468	0.0631258	0.0588101	0.0557224	0.0536011	0.0521841	0.0516912	0.0511238	0.0511284	0.0517855	0.0533875	0.0562216	0.0623409	0.081453	0.196486
0.416089	0.138256	0.10377	0.0827856	0.0691468	0.0631258	0.0588101	0.0557224	0.0536011	0.0521841	0.0516912	0.0511238	0.0511284	0.0517855	0.0533875	0.0562216	0.0623409	0.081453	0.166125
	QQR	QR
0.05	-0.0502265	-0.0403137
0.1	-0.0496969	-0.041021
0.15	-0.0540351	-0.0414227
0.2	-0.0540351	-0.0434582
0.25	-0.0497155	-0.0455404
0.3	-0.145093	-0.0475711
0.35	0.0757229	-0.0512944
0.4	0.00525298	-0.0542629
0.45	-0.641797	0.0816177
0.5	-1.61382	0.0776653
0.55	-0.332886	0.0725001
0.6	0.0451739	0.0697702
0.65	0.0988497	0.0660662
0.7	0.094599	0.0642477
0.75	0.0921977	0.0627032
0.8	0.0962247	0.0617864
0.85	0.0962247	0.0606001
0.9	0.0920583	0.0606516
0.95	0.0904604	0.0613039

## Sheet: CGD
-3.0644	-3.25941	-3.49048	-3.38344	-3.60949	-3.82185	-4.00496	-4.02167	-4.14128	-4.23912	-4.23171	-4.31936	-4.33061	-4.43059	-4.4495	-4.46311	-4.41888	-4.35712	-4.18705
-2.81588	-2.96908	-3.0551	-3.10883	-3.32006	-3.43315	-3.62502	-3.79234	-3.84763	-3.96451	-3.99701	-4.16999	-4.19875	-4.23399	-4.27168	-4.3625	-4.33123	-4.27436	-4.09171
-2.6346	-2.75462	-2.72799	-2.89483	-3.0222	-3.2192	-3.35038	-3.52507	-3.67715	-3.74783	-3.8578	-3.97681	-4.02007	-4.06776	-4.18162	-4.18118	-4.25023	-4.16116	-3.98892
-2.50357	-2.49987	-2.58925	-2.69132	-2.85684	-2.89379	-3.07433	-3.31991	-3.47672	-3.57028	-3.6856	-3.81505	-3.86947	-3.92544	-4.04255	-4.10689	-4.12906	-4.07175	-3.88232
-2.48459	-2.49612	-2.51127	-2.54717	-2.62317	-2.77305	-2.91878	-3.08761	-3.22316	-3.42025	-3.53941	-3.61354	-3.74038	-3.80052	-3.91587	-3.98321	-4.00853	-3.94391	-3.76311
-2.48459	-2.49612	-2.51109	-2.53286	-2.56083	-2.59818	-2.72468	-2.87139	-3.00866	-3.21495	-3.34305	-3.4971	-3.569	-3.68747	-3.79762	-3.8598	-3.87844	-3.84169	-3.67402
-2.4845	-2.49545	-2.50949	-2.5319	-2.55594	-2.5846	-2.60512	-2.70725	-2.83258	-3.03283	-3.16433	-3.33107	-3.46711	-3.58182	-3.68354	-3.73352	-3.74199	-3.70753	-3.60512
-2.4845	-2.48955	-2.5071	-2.52153	-2.53887	-2.56406	-2.59034	-2.60725	-2.64131	-2.80972	-3.00095	-3.10972	-3.25938	-3.37792	-3.52032	-3.55556	-3.60337	-3.58166	-3.56042
-2.4845	-2.48955	-2.50113	-2.51603	-2.52733	-2.55273	-2.56479	-2.58822	-2.59217	-2.63949	-2.73247	-2.8978	-3.05062	-3.22662	-3.31304	-3.38082	-3.47135	-3.47234	-3.5417
-2.4845	-2.48838	-2.49586	-2.50681	-2.52098	-2.53093	-2.54783	-2.55427	-2.55997	-2.56969	-2.5819	-2.66279	-2.78919	-2.96585	-3.10677	-3.21074	-3.30507	-3.40789	-3.50916
-2.4845	-2.48838	-2.49586	-2.50057	-2.50496	-2.51245	-2.51995	-2.52733	-2.52699	-2.52195	-2.52472	-2.50282	-2.57066	-2.70625	-2.84988	-3.01223	-3.14984	-3.31122	-3.48462
-2.48176	-2.4846	-2.48994	-2.49139	-2.49317	-2.49796	-2.49755	-2.48903	-2.48781	-2.46662	-2.46952	-2.44651	-2.41831	-2.42722	-2.55876	-2.73821	-2.94574	-3.19512	-3.45455
-2.48176	-2.48244	-2.4837	-2.4768	-2.48083	-2.47478	-2.46826	-2.45948	-2.45423	-2.43245	-2.40803	-2.38305	-2.35641	-2.32836	-2.32377	-2.47509	-2.78574	-3.07179	-3.39229
-2.48128	-2.47992	-2.47811	-2.47438	-2.46555	-2.45512	-2.44679	-2.42876	-2.41782	-2.39668	-2.37501	-2.34156	-2.30061	-2.28549	-2.26743	-2.30558	-2.52678	-2.91902	-3.32078
-2.44861	-2.46751	-2.45369	-2.43589	-2.41448	-2.39001	-2.36328	-2.35131	-2.32263	-2.30856	-2.2834	-2.27218	-2.27208	-2.27236	-2.25828	-2.25138	-2.32184	-2.68583	-3.17274
-2.2882	-2.28053	-2.26829	-2.25236	-2.2337	-2.21346	-2.22137	-2.1998	-2.18036	-2.19098	-2.20828	-2.22886	-2.22059	-2.23773	-2.23657	-2.2419	-2.24361	-2.40211	-3.02377
-2.08237	-2.07747	-2.06985	-2.06029	-2.0499	-2.0457	-2.07733	-2.10633	-2.12537	-2.14137	-2.14048	-2.17133	-2.19792	-2.20671	-2.2171	-2.22218	-2.23181	-2.25059	-2.8
-1.94001	-1.94991	-1.96885	-1.98604	-2.00505	-2.02514	-2.05242	-2.0665	-2.06439	-2.0851	-2.12325	-2.13089	-2.14429	-2.1729	-2.18692	-2.20109	-2.2241	-2.22964	-2.47143
-1.94001	-1.94991	-1.95441	-1.97034	-1.96127	-1.95726	-1.97522	-2.00309	-2.04284	-2.05878	-2.05489	-2.09265	-2.10364	-2.12371	-2.15407	-2.18003	-2.20557	-2.22121	-2.27509
	QQR	QR
0.05	-4.01179	-2.48651
0.1	-3.78225	-2.49402
0.15	-3.59155	-2.50681
0.2	-3.42126	-2.5334
0.25	-3.28388	-2.55393
0.3	-3.16587	-2.59121
0.35	-3.07135	-2.6079
0.4	-2.9644	-2.71938
0.45	-2.87067	-2.80426
0.5	-2.77887	-2.93532
0.55	-2.69448	-3.04188
0.6	-2.60704	-3.07247
0.65	-2.53785	-3.13085
0.7	-2.48246	-3.18214
0.75	-2.40769	-3.24018
0.8	-2.28276	-3.31122
0.85	-2.17232	-3.40936
0.9	-2.10673	-3.48462
0.95	-2.06442	-3.54293

## Sheet: OGAP
33.0751	34.1671	34.6669	36.3343	36.7036	39.0605	41.8262	45.0008	49.0944	53.1814	58.1889	65.7326	71.9629	80.9504	90.4117	99.9358	110.301	117.168	123.352
33.0751	34.1671	34.6669	36.3343	36.7036	39.0605	41.8262	45.0008	49.0944	53.1814	58.1889	65.7326	71.9629	80.9504	90.4117	99.9358	110.301	117.168	123.352
33.0751	34.1671	34.6669	36.3343	36.7036	39.0605	41.8262	45.0008	49.0944	53.1814	58.1889	65.7326	71.9629	80.9504	90.4117	99.9358	110.301	117.168	123.352
33.0751	34.1671	34.6669	36.3343	36.7036	39.0605	41.8262	45.0008	49.0944	53.1814	58.1889	65.7326	71.9629	80.9504	90.4117	99.9358	110.301	117.168	123.352
33.0751	34.1671	34.6669	36.3343	36.7036	39.0605	41.8262	45.0008	49.0944	53.1814	58.1889	65.7326	71.9629	80.9504	90.4117	99.9358	110.301	117.168	123.352
33.0751	34.1671	34.6669	36.3343	36.7036	39.0605	41.8262	45.0008	49.0944	53.1814	58.1889	65.7326	71.9629	80.9504	90.4117	99.9358	110.301	117.168	123.352
33.0751	34.1671	34.6669	36.3343	36.7036	39.0605	41.8262	45.0008	49.0944	53.1814	58.1889	65.7326	71.9629	80.9504	90.4117	99.9358	110.301	117.168	123.352
33.0751	34.1671	34.6669	36.3343	36.7036	39.0605	41.8262	45.0008	49.0944	53.1814	58.1889	65.7326	71.9629	80.9504	90.4117	99.9358	110.301	117.168	123.352
33.0751	34.1671	34.6669	36.3343	36.7036	39.0605	41.8262	45.0008	49.0944	53.1814	58.1889	65.7326	71.9629	80.9504	90.4117	99.9358	110.301	117.168	123.352
33.0751	34.1671	34.6669	36.3343	36.7036	39.0605	41.8262	45.0008	49.0944	53.1814	58.1889	65.7326	71.9629	80.9504	90.4117	99.9358	110.301	117.168	123.352
33.0751	34.1671	34.6669	36.3343	36.7036	39.0605	41.8262	45.0008	49.0944	53.1814	58.1889	65.7326	71.9629	80.9504	90.4117	99.9358	110.301	117.168	123.352
33.0751	34.1671	34.6669	36.3343	36.7036	39.0605	41.8262	45.0008	49.0944	53.1814	58.1889	65.7326	71.9629	80.9504	90.4117	99.9358	110.301	117.168	123.352
33.0751	34.1671	34.6669	36.3343	36.7036	39.0605	41.8262	45.0008	49.0944	53.1814	58.1889	65.7326	71.9629	80.9504	90.4117	99.9358	110.301	117.168	123.352
33.0751	34.1671	34.6669	36.3343	36.7036	39.0605	41.8262	45.0008	49.0944	53.1814	58.1889	65.7326	71.9629	80.9504	90.4117	99.9358	110.301	117.168	123.352
33.0751	34.1671	34.6669	36.3343	36.7036	39.0605	41.8262	45.0008	49.0944	53.1814	58.1889	65.7326	71.9629	80.9504	90.4117	99.9358	110.301	117.168	123.352
33.0751	34.1671	34.6669	36.3343	36.7036	39.0605	41.8262	45.0008	49.0944	53.1814	58.1889	65.7326	71.9629	80.9504	90.4117	99.9358	110.301	117.168	123.352
33.0751	34.1671	34.6669	36.3343	36.7036	39.0605	41.8262	45.0008	49.0944	53.1814	58.1889	65.7326	71.9629	80.9504	90.4117	99.9358	110.301	117.168	123.352
33.0751	34.1671	34.6669	36.3343	36.7036	39.0605	41.8262	45.0008	49.0944	53.1814	58.1889	65.7326	71.9629	80.9504	90.4117	99.9358	110.301	117.168	123.352
33.0751	34.1671	34.6669	36.3343	36.7036	39.0605	41.8262	45.0008	49.0944	53.1814	58.1889	65.7326	71.9629	80.9504	90.4117	99.9358	110.301	117.168	123.352
	QQR	QR
0.05	64.2691	33.0751
0.1	64.2691	34.1671
0.15	64.2691	34.6669
0.2	64.2691	36.3343
0.25	64.2691	36.7036
0.3	64.2691	39.0605
0.35	64.2691	41.8262
0.4	64.2691	45.0008
0.45	64.2691	49.0944
0.5	64.2691	53.1814
0.55	64.2691	58.1889
0.6	64.2691	65.7326
0.65	64.2691	71.9629
0.7	64.2691	80.9504
0.75	64.2691	90.4117
0.8	64.2691	99.9358
0.85	64.2691	110.301
0.9	64.2691	117.168
0.95	64.2691	123.352
