# Supplementary material for: Macroeconomic Imbalances and Financial Stress Among BRICS: Analysis of Frequency-Dependent and Asymmetric Causal Nexuses
Source: publisher site journal article supplement (doi:10.1515/snde-2024-0045), 2025-04-16
Supplement: Supplementary file 74 [file Signal.xlsx]

## Sheet: CA
	QQR	QR
0.05	#DIV/0!
0.1	#DIV/0!
0.15	#DIV/0!
0.2	#DIV/0!
0.25	#DIV/0!
0.3	#DIV/0!
0.35	#DIV/0!
0.4	#DIV/0!
0.45	#DIV/0!
0.5	#DIV/0!
0.55	#DIV/0!
0.6	#DIV/0!
0.65	#DIV/0!
0.7	#DIV/0!
0.75	#DIV/0!
0.8	#DIV/0!
0.85	#DIV/0!
0.9	#DIV/0!
0.95	#DIV/0!

## Sheet: CGD
-9.43773	-7.06378	-7.06378	-7.32243	-7.0165	-4.10976	-11.2344	-16.4752	-15.5511	-15.2625	-14.8702	-18.0429	-13.7955	-12.1321	-17.9135	-15.1047	-15.3586	-14.0403	-24.5648
-9.43773	-4.32625	-6.05635	-2.28519	-2.28519	-4.06192	-1.43219	-7.9101	-4.17823	-9.68991	-8.28294	-10.114	-9.09215	-11.6962	-9.09952	-13.9835	-12.9624	-10.9527	-19.0653
-5.84462	-4.32625	-0.703639	-1.45267	-1.3036	0.566566	-1.18199	-0.768683	-1.64947	-2.18966	-2.45632	-1.07204	-2.69683	-4.78405	-5.10382	-7.4821	-10.8727	-8.50505	-15.4943
-1.69628	2.02701	3.16648	2.95628	2.2283	1.76042	2.51427	2.88085	3.55885	4.58739	3.08711	3.32167	3.17369	2.17865	-0.0525384	0.329571	-0.566446	2.13595	1.64848
3.01788	3.41094	3.38861	3.14811	3.15242	5.11408	5.55729	5.90251	6.56585	6.69033	7.16258	6.48856	6.98775	7.06503	7.88691	10.4683	12.8755	6.99663	6.575
3.01788	3.07285	3.16648	3.29298	3.15242	4.96967	6.72781	7.31366	7.37972	7.94079	11.2311	11.0975	13.7618	14.1562	16.7239	16.5947	15.1216	14.2403	9.96381
2.40331	2.84823	2.81198	2.64172	3.02827	2.81613	4.25399	5.90251	6.56944	9.60965	11.3979	15.0664	15.2778	18.2591	17.7409	17.8817	17.0626	16.0303	9.96381
1.69196	0.968004	1.82668	2.2705	1.29723	1.39353	2.1321	1.61283	2.67589	4.84893	10.8534	15.0664	14.4576	18.055	17.2954	17.8817	15.1997	10.9126	7.44096
0.283064	-0.155281	0.147499	0.0165591	0.253486	0.298382	-0.110748	-0.506961	-0.789515	-0.130192	-0.529046	8.4877	9.49431	2.84956	4.57777	8.70627	9.71448	9.14955	2.82191
-2.24065	-1.43094	-1.52869	-1.44084	-1.94171	-2.03571	-2.36965	-2.11203	-2.76018	-4.60092	-9.25431	-14.807	-16.8196	-17.9737	-16.871	-15.9578	-8.141	2.78832	2.82191
-4.12646	-5.27686	-4.17661	-2.80371	-2.37081	-3.28404	-3.43747	-3.76161	-6.31256	-6.49744	-14.7267	-14.9981	-20.1734	-19.3601	-18.2391	-18.3876	-19.1813	-22.967	-18.0308
-5.66444	-5.67537	-6.61626	-3.34241	-2.37081	-3.28404	-3.90962	-4.31264	-6.31256	-6.49744	-8.53479	-10.0457	-13.0561	-16.4648	-16.711	-18.0057	-18.4046	-22.967	-27.5966
-5.19704	-7.11917	-6.61626	-1.52869	-1.44084	-1.17647	-2.5695	-4.26429	-5.64734	-5.7779	-6.41693	-6.83743	-8.27918	-8.32195	-10.9014	-12.4872	-14.8225	-18.1053	-18.0308
-4.25439	6.00656	2.81539	2.23368	0.361164	-0.227318	-0.970165	-2.5695	-3.32485	-3.55041	-4.90559	-5.05763	-3.48945	-3.54648	-4.31574	-3.84619	-0.172638	-1.44086	-6.06747
5.89539	6.38443	6.00656	5.89646	2.91375	4.07587	1.78552	3.654	3.57907	2.9631	2.94181	3.32478	3.38275	2.34903	3.0787	2.63349	2.32007	3.12878	1.62458
4.72048	6.21321	6.21321	6.16996	6.16996	5.78782	5.63951	5.84539	5.84539	5.44541	5.60451	6.20758	5.11153	4.83738	4.83738	4.16093	4.97463	6.78947	8.44037
4.72048	6.21321	6.21321	6.16996	6.16996	5.78782	5.63951	6.49354	5.84539	6.19036	6.19036	6.31948	6.58907	4.83738	5.89182	6.257	8.64003	6.78947	8.44037
4.525	6.21321	6.21321	6.16996	6.16996	5.63951	5.63951	5.84539	5.84539	6.19036	6.19036	6.20758	5.43769	4.83738	4.83738	6.55086	4.97463	-5.5209	-5.5209
3.33819	6.21321	5.89646	6.16996	4.76933	5.63951	4.65961	5.44541	5.44541	6.19036	5.35548	4.07877	4.07877	4.83738	4.83738	2.22335	-17.2877	-5.5209	-5.5209
	QQR	QR
0.05	-12.9663	-0.568299
0.1	-8.25852	0.800687
0.15	-4.06954	0.94357
0.2	2.06525	0.665112
0.25	6.23444	0.9065
0.3	9.10132	0.722305
0.35	9.55609	0.5113
0.4	7.78319	0.967659
0.45	2.87257	0.794714
0.5	-6.14082	0.919778
0.55	-10.9532	0.676408
0.6	-10.5143	0.516708
0.65	-7.66001	0.293939
0.7	-1.91168	-0.0504348
0.75	3.57569	-0.27001
0.8	5.73758	-1.6759
0.85	6.28413	-0.768606
0.9	4.54977	-2.01812
0.95	2.67627	-4.24052

## Sheet: OGAP
20.1594	12.3367	-5.15297	-4.04971	-3.44733	-2.48775	-1.67897	-0.832725	2.37342	2.78619	3.76705	4.58801	5.80156	8.32904	10.5566	19.5018	22.6267	29.8852	38.2958
20.1594	13.5445	-5.15297	-4.04971	-3.44733	-2.48775	-1.67897	-0.832725	2.37342	2.78619	3.76705	4.58801	5.80156	8.32904	10.5566	19.5018	22.6267	29.8852	38.2958
33.2083	13.5445	-5.15297	-4.04971	-3.44733	-2.48775	-1.67897	-0.832725	2.37342	2.78619	3.76705	4.58801	5.80156	8.95236	10.5566	19.5018	22.6267	29.8852	38.2958
33.2083	14.9745	11.7211	0.323207	-3.44733	-2.48775	-1.67897	-0.832725	2.37342	3.01648	3.76705	4.58801	5.80156	8.95236	10.5566	19.5018	22.6267	29.8852	38.2958
33.2083	16.9556	11.7211	1.93361	-3.44733	-2.48775	-1.67897	-0.832725	2.37342	3.01648	3.76705	4.58801	5.80156	8.95236	10.9914	19.5018	22.6267	29.8852	38.2958
33.2083	16.9556	11.7211	1.93361	-0.580963	-2.48775	-1.5813	0.395396	2.37342	3.01648	3.76705	4.58801	5.80156	8.95236	10.9914	19.5018	22.6267	29.8852	38.2958
33.2083	18.2113	12.8304	1.93361	1.98047	-2.48775	1.95461	2.73743	2.37342	3.01648	3.90714	4.58801	5.80156	8.95236	10.9914	19.5018	22.6267	29.8852	38.2958
33.2083	18.2113	14.45	1.93361	1.98047	-2.48775	1.95461	2.73743	2.37342	3.01648	3.90714	4.58801	5.80156	8.95236	10.9914	19.5018	22.6267	29.8852	38.2958
33.2083	18.7385	14.45	1.93361	4.25203	0.00393757	1.97537	6.74977	8.54933	5.30264	6.59619	5.57715	6.21259	8.95236	10.9914	20.763	22.6267	29.8852	38.2958
33.2083	18.7385	14.45	8.15535	9.08546	6.0369	10.8424	6.80328	11.9857	6.51959	6.59619	5.57715	6.21259	14.9772	10.9914	20.763	22.6267	29.8852	38.2958
33.2083	18.7385	14.45	8.15535	13.0545	6.0369	11.6752	6.80328	14.8404	7.38179	6.59619	6.12048	10.9251	21.5544	10.9914	20.763	22.6267	29.8852	38.2958
33.2083	18.7385	14.45	8.15535	13.0981	6.0369	11.6752	6.80328	17.161	11.7077	6.59705	6.92428	10.9251	21.5544	34.0666	20.763	22.6267	29.8852	38.2958
33.2083	18.7385	14.45	8.15535	13.0981	14.7829	11.6752	6.80328	17.161	11.7077	8.16937	6.92428	10.9251	24.6535	36.9998	20.763	22.6267	29.8852	38.2958
33.2083	18.7385	14.45	8.60211	13.0981	14.7829	13.1198	6.80328	17.161	11.7077	14.6158	15.3429	10.9251	24.6535	36.9998	41.8519	22.6267	29.8852	38.2958
33.2083	18.7385	14.45	12.2119	13.0981	14.7829	13.4343	6.80328	17.161	13.4478	14.9411	15.3429	31.8825	24.6535	36.9998	55.3116	22.6267	29.8852	38.2958
33.2083	18.7385	22.8692	12.2119	13.0981	14.7829	13.4343	9.71813	19.1922	24.3161	14.9411	15.3429	31.8825	24.6535	36.9998	55.3116	22.6267	29.8852	38.2958
33.2083	18.7385	22.8692	12.2119	13.0981	14.7829	13.6457	31.3635	21.9964	24.3161	14.9411	15.3429	31.8825	24.6535	39.9904	55.3116	25.6024	29.8852	38.2958
33.2083	18.7385	22.8692	12.2119	13.0981	19.2476	13.6457	31.3635	21.9964	24.3161	14.9411	15.3429	31.8825	31.3061	39.9904	55.3116	25.6024	29.8852	38.2958
33.2083	18.7385	24.4994	12.2119	13.2265	19.2476	15.6878	31.3635	21.9964	24.3161	15.0812	15.3429	31.8825	45.7588	42.5292	59.235	25.6024	29.8852	38.2958
	QQR	QR
0.05	8.59779	33.2083
0.1	8.66136	18.2113
0.15	9.38095	14.45
0.2	10.5866	8.15535
0.25	10.7985	9.08546
0.3	11.0191	0.00393757
0.35	11.5952	10.8424
0.4	11.6804	4.13959
0.45	12.8981	11.3722
0.5	14.829	6.51959
0.55	15.9001	6.59557
0.6	17.5091	5.57715
0.65	18.3696	5.85058
0.7	20.3615	9.04482
0.75	22.4882	10.9914
0.8	23.7636	20.763
0.85	25.3756	22.6267
0.9	25.9607	29.8852
0.95	27.2689	38.2958
