# Supplementary material for: Macroeconomic Imbalances and Financial Stress Among BRICS: Analysis of Frequency-Dependent and Asymmetric Causal Nexuses
Source: publisher site journal article supplement (doi:10.1515/snde-2024-0045), 2025-04-16
Supplement: Supplementary file 76 [file original data.xlsx]

## Sheet: Brazil
Date	FSI	CA	CGD	OGAP
1998-01-01	-0.520282	-3.69319	1.73579	0.00300355
1998-04-01	-0.342916	-3.28041	1.76057	0.00761848
1998-07-01	-1.28441	-4.49438	1.78534	0.00490261
1998-10-01	-1.41838	-4.40603	1.81012	-0.00185648
1999-01-01	-1.56435	-5.0402	1.80681	-0.00354482
1999-04-01	-1.46297	-4.34363	1.80351	-0.004194
1999-07-01	-1.18425	-4.0939	1.8002	-0.0061793
1999-10-01	-1.26046	-3.83546	1.79689	-0.00273983
2000-01-01	-0.207964	-3.28543	1.80502	-0.000572667
2000-04-01	-0.17985	-4.15258	1.81316	0.00261237
2000-07-01	-0.834074	-3.80282	1.82129	0.00592924
2000-10-01	-0.199825	-5.09859	1.83202	0.00821187
2001-01-01	-0.0801184	-4.79044	1.84274	0.00657837
2001-04-01	-0.17503	-4.70448	1.85347	0.00226474
2001-07-01	0.0349211	-4.63065	1.8642	-0.00239106
2001-10-01	0.189526	-3.68069	1.87493	-0.0072941
2002-01-01	1.00888	-2.64473	1.86835	0.000673109
2002-04-01	1.17197	-3.47688	1.86178	-0.000708798
2002-07-01	0.215724	-0.995483	1.85521	0.00155561
2002-10-01	0.160195	0.106418	1.84864	0.00258006
2003-01-01	0.256545	0.165968	1.84588	-0.0021239
2003-04-01	-0.260653	0.200055	1.84312	-0.00917077
2003-07-01	-0.16372	0.551761	1.84036	-0.00920652
2003-10-01	0.196775	0.898082	1.83759	-0.00840159
2004-01-01	0.297186	0.96982	1.83483	-0.00578248
2004-04-01	0.803137	1.45849	1.83207	0.00182404
2004-07-01	0.45013	1.88744	1.82931	0.00292199
2004-10-01	0.0763206	1.48968	1.82655	0.00236256
2005-01-01	0.457791	1.35171	1.82523	0.00173117
2005-04-01	0.578743	1.02426	1.82391	0.00224934
2005-07-01	0.883077	1.32421	1.82259	-0.00512771
2005-10-01	0.607403	1.24106	1.82127	-0.00353257
2006-01-01	0.147005	1.0445	1.81741	-0.00194515
2006-04-01	0.227815	0.258393	1.81356	-0.00480293
2006-07-01	-0.364492	1.32318	1.80971	-0.00253134
2006-10-01	-0.233001	1.05595	1.80586	-0.00176708
2007-01-01	-0.0868617	0.563034	1.80242	0.00099898
2007-04-01	0.774591	0.204155	1.79898	0.00370155
2007-07-01	0.798806	-0.755798	1.79554	0.0032645
2007-10-01	0.357726	-0.897681	1.79301	0.00495134
2008-01-01	2.02606	-2.32457	1.79048	0.00601774
2008-04-01	0.812979	-2.06124	1.78794	0.0101418
2008-07-01	0.434686	-2.4817	1.78541	0.0119387
2008-10-01	0.641624	-1.49903	1.78287	-0.00903684
2009-01-01	0.419109	-1.52845	1.78837	-0.0193533
2009-04-01	0.311808	-1.08008	1.79387	-0.0163065
2009-07-01	0.633617	-1.60407	1.79937	-0.010623
2009-10-01	0.615872	-2.2857	1.80487	-0.0041805
2010-01-01	0.806168	-4.36733	1.80055	0.000821215
2010-04-01	1.00017	-3.99908	1.79623	0.00204155
2010-07-01	0.372512	-4.22395	1.79191	0.00187491
2010-10-01	0.413843	-3.12157	1.78759	0.00396554
2011-01-01	0.34687	-3.16851	1.78404	0.00667305
2011-04-01	-0.266114	-3.19211	1.78048	0.00710362
2011-07-01	-0.139905	-3.1091	1.77692	0.00324765
2011-10-01	-0.543595	-3.75751	1.77336	0.0043401
2012-01-01	-0.102659	-3.12213	1.77428	-0.0042994
2012-04-01	-0.202739	-4.017	1.77521	0.000699255
2012-07-01	0.233771	-3.52014	1.77614	0.00613215
2012-10-01	0.775972	-4.78438	1.77706	0.00463614
2013-01-01	0.643632	-3.59977	1.7722	0.00529662
2013-04-01	0.543533	-3.43492	1.76734	0.0104392
2013-07-01	0.748239	-4.17071	1.76247	0.0113905
2013-10-01	0.241884	-3.38995	1.75761	0.011669
2014-01-01	0.559586	-4.44455	1.75992	0.0147218
2014-04-01	0.918785	-3.96798	1.76223	0.00903179
2014-07-01	1.50521	-4.33935	1.76453	0.0089522
2014-10-01	1.98047	-5.08931	1.76684	0.0113878
2015-01-01	3.30275	-4.9917	1.78774	0.0085752
2015-04-01	1.2995	-3.63448	1.80864	-0.000559165
2015-07-01	1.02541	-2.76265	1.82955	-0.00643198
2015-10-01	0.671022	-1.96888	1.8368	-0.00970186
2016-01-01	0.33845	-1.66526	1.84405	-0.0147865
2016-04-01	0.312375	-1.52205	1.8513	-0.0125445
2016-07-01	-0.161867	-1.38762	1.85855	-0.013846
2016-10-01	-0.597531	-2.15502	1.86581	-0.0137339
2017-01-01	-0.00265007	-0.550981	1.87322	-0.00899669
2017-04-01	-0.262645	-0.824136	1.88064	-0.00520608
2017-07-01	-0.320216	-1.64447	1.88806	-0.00327157
2017-10-01	-0.831272	-2.06393	1.89547	-0.000928936
2018-01-01	-0.994455	-2.30862	1.89786	0.00104593
2018-04-01	-1.39657	-2.38959	1.90025	0.00100597
2018-07-01	-2.20795	-3.718	1.90265	0.00486194
2018-10-01	-1.9344	-3.18993	1.90504	0.00301169
2019-01-01	-1.85915	-2.43644	1.90813	0.00369155
2019-04-01	-2.87118	-3.08621	1.91123	0.00604706
2019-07-01	-2.80566	-4.75907	1.91432	0.00529126
2019-10-01	-2.90526	-4.35439	1.91742	0.00720949
2020-01-01	-2.32215	-3.82373	1.92387	-0.00380862
2020-04-01	-1.45396	0.416352	1.93033	-0.0442119
2020-07-01	-0.156929	0.163954	1.93678	-0.0124719
2020-10-01	0.0590714	-2.97369	1.94324	0.000245097
2021-01-01	0.0784327	-4.73879	1.94916	0.00233373
2021-04-01	0.450422	0.0365923	1.95509	-0.000285681
2021-07-01	0.548023	-1.70054	1.96102	-0.00047891
2021-10-01	0.674458	-4.87221	1.96694	0.00196963

## Sheet: Russia
Date	FSI	CA	CGD	OGAP
1998-01-01	5.0513	8.68888	1.86392	0.0119425
1998-04-01	3.50555	8.75925	1.89192	0.0111932
1998-07-01	3.00675	8.82962	1.91992	0.0104364
1998-10-01	3.47217	8.89999	1.94792	0.00965774
1999-01-01	2.86722	8.97036	1.90329	0.00883614
1999-04-01	1.93861	9.04074	1.85865	0.00794461
1999-07-01	1.11452	9.11111	1.81401	0.00695062
1999-10-01	0.801066	9.18148	1.76938	0.00581665
2000-01-01	0.573374	9.25185	1.74847	0.00450086
2000-04-01	0.81794	9.32222	1.72756	0.00295776
2000-07-01	0.541394	9.39259	1.70665	0.00113906
2000-10-01	0.674469	9.46296	1.68574	-0.00100541
2001-01-01	1.08276	9.53333	1.64876	-0.00352649
2001-04-01	1.11741	9.60371	1.61178	-0.00647442
2001-07-01	1.16156	9.67408	1.5748	-0.00989723
2001-10-01	0.553438	9.74445	1.53782	-0.0138389
2002-01-01	0.184555	9.81482	1.51438	-0.0183372
2002-04-01	-1.09593	9.88519	1.49093	-0.0234213
2002-07-01	-1.08235	9.95556	1.46749	-0.0291089
2002-10-01	-0.208518	10.0259	1.44404	-0.035403
2003-01-01	-0.768827	10.0963	1.41715	-0.0422885
2003-04-01	-0.897186	10.1667	1.39025	-0.0162533
2003-07-01	-0.250806	6.145	1.36336	0.0189154
2003-10-01	-0.7915	6.44362	1.33646	0.024175
2004-01-01	-1.59271	6.61341	1.28321	-0.0341995
2004-04-01	-0.967406	8.09008	1.22997	-0.00655203
2004-07-01	-0.951337	8.31857	1.17672	0.0244537
2004-10-01	-1.06856	9.77715	1.12348	0.0241521
2005-01-01	-1.45612	10.6487	1.07425	-0.0376851
2005-04-01	-2.22261	9.80509	1.02501	-0.00882356
2005-07-01	-1.15476	10.8767	0.975777	0.0216177
2005-10-01	-1.51412	9.71094	0.926542	0.0286001
2006-01-01	-1.49792	10.9459	0.908774	-0.0350614
2006-04-01	-1.18506	11.9379	0.891006	-0.002678
2006-07-01	-1.02631	9.03146	0.873238	0.0287912
2006-10-01	-2.06465	8.98577	0.855469	0.0393453
2007-01-01	-1.19759	6.07744	0.837701	-0.0265407
2007-04-01	-1.55126	5.77116	0.819933	0.00925297
2007-07-01	-1.5794	4.17537	0.802165	0.0403159
2007-10-01	-0.254738	4.39301	0.784396	0.056432
2008-01-01	1.3675	6.53009	0.810984	-0.00788322
2008-04-01	0.631539	7.14524	0.837571	0.0244669
2008-07-01	0.573901	6.01985	0.864159	0.0511344
2008-10-01	0.297998	6.15761	0.890746	0.0360347
2009-01-01	-0.166086	3.97552	0.898877	-0.0630322
2009-04-01	-1.36141	1.11626	0.907008	-0.0389457
2009-07-01	-0.505732	1.9677	0.915139	0.00083187
2009-10-01	-0.311148	5.68115	0.923269	0.0141419
2010-01-01	-0.344688	5.54275	0.929658	-0.0557698
2010-04-01	-0.226768	6.53945	0.936048	-0.0275248
2010-07-01	-0.312235	4.81659	0.942437	0.00755615
2010-10-01	-0.595907	2.34569	0.948826	0.0262036
2011-01-01	0.575582	3.51744	0.956887	-0.0433883
2011-04-01	-0.284305	3.75957	0.964949	-0.016625
2011-07-01	0.354597	4.66618	0.973011	0.00813591
2011-10-01	-0.419591	4.71637	0.981072	0.0386591
2012-01-01	-0.931758	5.73924	0.996724	-0.0279623
2012-04-01	-1.33407	4.83466	1.01238	-0.00437891
2012-07-01	-0.899002	3.20632	1.02803	0.0150919
2012-10-01	-1.08184	2.81017	1.04368	0.0415212
2013-01-01	-0.988099	2.20336	1.06762	-0.030094
2013-04-01	-0.696355	1.64527	1.09156	-0.00344937
2013-07-01	-0.814828	0.675581	1.11551	0.0156664
2013-10-01	-1.55883	1.89372	1.13945	0.0470609
2014-01-01	2.70816	1.55732	1.14227	-0.0351297
2014-04-01	0.92802	1.90309	1.14509	-0.00535846
2014-07-01	0.808921	2.61602	1.14791	0.0178833
2014-10-01	2.28496	3.07559	1.15073	0.0476423
2015-01-01	1.72768	3.19094	1.14837	-0.0449101
2015-04-01	0.934047	6.2266	1.14601	-0.0218339
2015-07-01	0.729469	5.00704	1.14366	0.00774241
2015-10-01	0.619028	4.28633	1.1413	0.0380114
2016-01-01	0.418738	4.11123	1.13851	-0.0484648
2016-04-01	0.21207	1.41878	1.13573	-0.0232105
2016-07-01	0.121374	1.61712	1.13294	0.00505495
2016-10-01	0.0526733	2.05694	1.13016	0.0371814
2017-01-01	-0.534587	2.50342	1.12541	-0.0462083
2017-04-01	-0.598503	2.82018	1.12067	-0.0168123
2017-07-01	-0.592275	1.51719	1.11593	0.0124568
2017-10-01	-0.2211	1.16012	1.11119	0.0375426
2018-01-01	-0.110628	2.73237	1.11324	-0.0395589
2018-04-01	-0.0904245	4.13506	1.11528	-0.00962195
2018-07-01	-0.182122	5.93875	1.11733	0.0191269
2018-10-01	-0.441268	8.88471	1.11938	0.0466849
2019-01-01	-0.796467	8.76715	1.13178	-0.0388757
2019-04-01	-0.130427	5.20506	1.14418	-0.00922284
2019-07-01	-0.965308	4.25545	1.15658	0.0255532
2019-10-01	-0.888429	4.20393	1.16897	0.0541218
2020-01-01	-0.713337	2.46444	1.18137	-0.0377277
2020-04-01	-0.365606	3.05845	1.19377	-0.0493545
2020-07-01	-0.0323134	1.78061	1.20616	0.00534344
2020-10-01	-0.0254547	2.50857	1.21856	0.0413018
2021-01-01	-0.155826	1.92556	1.23096	-0.0458627
2021-04-01	0.642404	2.39734	1.24335	-0.0115195
2021-07-01	0.362088	5.40801	1.25575	0.0178495
2021-10-01	0.441068	9.73985	1.26815	0.016392

## Sheet: India
Date	FSI	CA	CGD	OGAP
1998-01-01	2.2455	-2.79986	1.73942	0.13828
1998-04-01	1.8333	-1.75592	1.73226	-0.164475
1998-07-01	1.50921	-0.929642	1.72511	0.356032
1998-10-01	1.65157	-1.02826	1.71796	-0.131576
1999-01-01	1.33315	-0.301557	1.72473	0.198018
1999-04-01	1.63381	-0.963408	1.7315	1.17185
1999-07-01	2.08054	-0.696877	1.73827	-0.149952
1999-10-01	1.32289	-0.858118	1.74504	0.268954
2000-01-01	0.707203	-1.90196	1.74867	0.728682
2000-04-01	0.906102	-1.39731	1.75231	-1.22855
2000-07-01	1.3265	-1.13372	1.75594	-0.0334455
2000-10-01	0.931468	0.61528	1.76013	-1.32275
2001-01-01	0.126116	-0.526684	1.76432	-0.834033
2001-04-01	0.278918	1.68231	1.7685	0.690193
2001-07-01	0.3453	-0.389963	1.77269	-0.176614
2001-10-01	-0.4366	0.584229	1.77687	0.854503
2002-01-01	-0.205183	0.909824	1.77203	-0.667499
2002-04-01	-0.935498	1.63015	1.76719	-0.889586
2002-07-01	-1.79272	2.08511	1.76235	-0.963884
2002-10-01	-1.83801	1.2982	1.75751	-1.52791
2003-01-01	-1.64396	-0.0571028	1.75349	0.59299
2003-04-01	-1.23162	0.335888	1.74946	0.822186
2003-07-01	-0.592084	3.05451	1.74544	0.869171
2003-10-01	-1.82312	3.00315	1.74141	1.47073
2004-01-01	-1.13349	2.61034	1.73544	-1.49424
2004-04-01	-0.441332	2.73539	1.72946	0.476402
2004-07-01	-0.539857	-1.63582	1.72349	0.456956
2004-10-01	0.478834	-2.72426	1.71751	-0.0382825
2005-01-01	-0.82796	-0.157865	1.71088	-0.253117
2005-04-01	-0.362247	-1.78048	1.70425	1.13896
2005-07-01	-0.206608	-1.30257	1.69762	-0.654535
2005-10-01	-0.733511	-1.86194	1.69099	0.469545
2006-01-01	-0.56831	-0.22399	1.68727	0.440589
2006-04-01	-0.585302	-1.2946	1.68355	-0.629531
2006-07-01	-0.892804	-1.54585	1.67982	1.24146
2006-10-01	-0.344	-1.11229	1.6761	-0.340566
2007-01-01	-0.039704	-0.285728	1.67629	0.755774
2007-04-01	1.47374	-1.03402	1.67647	0.500747
2007-07-01	1.94145	-0.615789	1.67666	-0.203733
2007-10-01	1.97724	-0.843196	1.69333	1.40149
2008-01-01	-0.20104	-2.86546	1.68268	-1.34626
2008-04-01	-0.934464	-0.164511	1.67203	-0.886728
2008-07-01	-0.905449	-2.82719	1.66138	-1.04169
2008-10-01	-0.703492	-4.1386	1.65073	-1.77432
2009-01-01	-0.535582	-1.51089	1.6532	-3.73162
2009-04-01	-0.113323	-0.783579	1.65567	3.927
2009-07-01	-0.473625	-2.31013	1.65815	0.686866
2009-10-01	-0.0981824	-3.43336	1.66062	0.271132
2010-01-01	0.216684	-4.34633	1.6637	0.758285
2010-04-01	0.403205	-3.27144	1.66678	0.577003
2010-07-01	1.44225	-3.80461	1.66987	1.14927
2010-10-01	1.88268	-2.27183	1.67295	0.535226
2011-01-01	0.794153	-2.12931	1.67269	0.0664798
2011-04-01	1.5863	-3.72185	1.67244	-0.53155
2011-07-01	0.471124	-3.70876	1.67219	-1.72839
2011-10-01	1.01034	-4.21258	1.67193	-0.0805503
2012-01-01	0.788235	-5.48291	1.6697	-0.317279
2012-04-01	1.17904	-4.04722	1.66746	-0.532569
2012-07-01	1.00202	-4.3356	1.66523	0.107261
2012-10-01	0.26793	-6.33129	1.663	-0.499437
2013-01-01	0.434466	-4.45438	1.6624	-0.0901361
2013-04-01	0.559633	-4.84673	1.66181	-0.28997
2013-07-01	0.920059	-0.781189	1.66121	-0.099213
2013-10-01	0.721131	-0.405773	1.66062	0.493509
2014-01-01	0.210826	-0.859107	1.66004	-0.555655
2014-04-01	0.362343	-1.61851	1.65947	0.568813
2014-07-01	0.65045	-1.9342	1.6589	0.100639
2014-10-01	0.24561	-1.10704	1.65832	-0.193006
2015-01-01	0.397073	-0.648683	1.65426	-0.041393
2015-04-01	0.130165	-1.1821	1.6502	0.421136
2015-07-01	-0.0830034	-1.53259	1.64614	0.135184
2015-10-01	0.213239	-0.994179	1.64598	0.336044
2016-01-01	-0.463485	-0.565754	1.64582	1.22582
2016-04-01	-0.414313	0.0322583	1.64566	0.129735
2016-07-01	-0.294495	-0.437786	1.6455	0.670724
2016-10-01	-0.399773	-1.1221	1.64535	-0.222443
2017-01-01	-0.207332	-1.03876	1.64519	-0.748885
2017-04-01	0.548158	-2.23023	1.64503	0.549977
2017-07-01	0.501003	-0.903988	1.64487	0.181001
2017-10-01	-0.0560685	-1.74406	1.64471	0.45371
2018-01-01	-0.271504	-2.48395	1.65103	0.764035
2018-04-01	-0.480736	-2.1556	1.65735	-0.0323974
2018-07-01	-0.229413	-2.73358	1.66366	0.0956222
2018-10-01	-0.865455	-2.23668	1.66998	0.208213
2019-01-01	-0.0192479	-1.36975	1.68793	-0.211924
2019-04-01	-1.0265	-1.97258	1.70588	0.22481
2019-07-01	-1.46439	-0.903575	1.72384	-0.659423
2019-10-01	-1.24716	-0.00190049	1.74179	-1.07077
2020-01-01	-1.32876	-0.582426	1.74088	-1.13667
2020-04-01	-1.59551	3.87765	1.73997	-23.8197
2020-07-01	-1.53821	2.49421	1.73907	21.2433
2020-10-01	-1.92826	0.118281	1.73816	4.94904
2021-01-01	-2.04698	-1.6893	1.73725	-0.0291265
2021-04-01	-1.7895	0.897674	1.73635	-8.95942
2021-07-01	-0.981818	-1.01463	1.73544	7.85011
2021-10-01	-0.762402	-2.10525	1.73453	0.450407

## Sheet: china
Date	FSI	CA	CGD	OGAP
1998-01-01	1.4763	5.86878	1.16496	-0.119683
1998-04-01	1.09296	2.93136	1.15224	-0.618532
1998-07-01	0.10357	1.85302	1.13951	0.182694
1998-10-01	0.88782	2.56317	1.12679	1.38446
1999-01-01	0.835075	0.867666	1.1889	1.0871
1999-04-01	1.0123	1.1107	1.25101	-0.00988672
1999-07-01	0.946064	3.44579	1.31311	-0.407708
1999-10-01	0.778327	1.59796	1.37522	-1.40755
2000-01-01	0.597584	1.95798	1.39537	0.489642
2000-04-01	0.720424	1.95535	1.41551	0.783821
2000-07-01	0.17499	2.03285	1.43566	0.374619
2000-10-01	0.294028	1.22142	1.43416	-1.03881
2001-01-01	0.403764	2.66401	1.43267	0.842432
2001-04-01	0.44277	0.619161	1.43117	-0.182078
2001-07-01	0.0392153	1.29427	1.42968	-0.913309
2001-10-01	-0.370784	1.07753	1.42818	-1.55211
2002-01-01	-0.429726	3.55922	1.43525	-0.298765
2002-04-01	-0.531305	2.24394	1.44231	-0.552579
2002-07-01	-0.446026	1.55373	1.44937	0.0873242
2002-10-01	-0.293596	2.40277	1.45643	-0.577833
2003-01-01	-1.29009	1.44948	1.4579	1.25312
2003-04-01	-1.28089	2.98651	1.45936	-0.918294
2003-07-01	-0.80736	1.80794	1.46083	-0.191323
2003-10-01	-1.61315	3.39755	1.4623	-0.36465
2004-01-01	-1.31499	2.07145	1.46414	0.0631665
2004-04-01	-1.49355	2.12144	1.46599	0.893793
2004-07-01	-0.821227	3.24109	1.46783	-1.07114
2004-10-01	-0.446552	5.65976	1.46967	-2.23057
2005-01-01	-0.265465	6.44705	1.46716	-0.0827544
2005-04-01	-0.454927	6.19947	1.46464	-0.224558
2005-07-01	-0.102484	5.36448	1.46212	-0.652798
2005-10-01	-0.632094	5.17145	1.4596	0.835851
2006-01-01	-1.61358	7.64678	1.4558	0.845121
2006-04-01	-2.0599	7.86333	1.452	1.97822
2006-07-01	-1.85307	8.1757	1.4482	0.437841
2006-10-01	-2.28632	9.29781	1.4444	0.725418
2007-01-01	-2.02927	11.0788	1.44817	2.04213
2007-04-01	-2.23952	10.8246	1.45195	3.28869
2007-07-01	-2.49515	10.2004	1.45572	2.66455
2007-10-01	-1.53936	8.02942	1.4595	2.36709
2008-01-01	-0.815431	10.4534	1.4707	0.0920287
2008-04-01	-3.24073	8.92382	1.4819	-0.366383
2008-07-01	-3.72824	8.47243	1.49311	-1.61396
2008-10-01	-2.47993	8.72067	1.50431	-3.8563
2009-01-01	-1.11369	7.7029	1.50541	-4.39797
2009-04-01	-0.955986	3.78838	1.50652	-2.44114
2009-07-01	-1.41243	3.06076	1.50762	0.114773
2009-10-01	-0.788813	4.85716	1.50872	1.57187
2010-01-01	-0.762721	3.18774	1.51218	2.0322
2010-04-01	-1.05819	3.49132	1.51564	0.796804
2010-07-01	0.37395	4.86468	1.5191	0.0654682
2010-10-01	0.819701	3.70426	1.52256	0.237478
2011-01-01	0.34687	1.09469	1.52492	0.712077
2011-04-01	-0.266114	2.75609	1.52728	0.688361
2011-07-01	-0.139905	1.77517	1.52963	0.264981
2011-10-01	-0.543595	1.26455	1.53199	-0.159843
2012-01-01	-0.102659	2.77314	1.5309	-0.688057
2012-04-01	-0.202739	2.99008	1.52981	-0.921505
2012-07-01	0.233771	3.06664	1.52872	-0.961602
2012-10-01	0.775972	1.23062	1.52763	-0.209189
2013-01-01	0.643632	3.41517	1.52353	-0.264504
2013-04-01	0.543533	1.94494	1.51942	-0.427654
2013-07-01	0.748239	1.02059	1.51531	0.00141867
2013-10-01	0.241884	0.399986	1.51121	-0.0769615
2014-01-01	0.559586	1.51802	1.50644	-0.16247
2014-04-01	0.918785	2.88332	1.50167	0.0452647
2014-07-01	1.50521	2.63307	1.4969	-0.253283
2014-10-01	1.98047	1.84652	1.49213	-0.0576681
2015-01-01	3.30275	4.2225	1.48987	-0.167287
2015-04-01	1.2995	2.49814	1.4876	-0.081499
2015-07-01	1.02541	2.07624	1.48534	-0.0995607
2015-10-01	0.671022	2.07527	1.48308	-0.120677
2016-01-01	0.33845	2.7652	1.48074	-0.0439891
2016-04-01	0.312375	2.20235	1.4784	-0.0685655
2016-07-01	-0.161867	2.27114	1.47607	0.00655488
2016-10-01	-0.597531	-0.0896621	1.47373	0.182375
2017-01-01	-0.00265007	1.63004	1.47181	0.359894
2017-04-01	-0.262645	1.865	1.46989	0.439998
2017-07-01	-0.320216	1.18786	1.46797	0.423346
2017-10-01	-0.831272	1.4186	1.46605	0.410324
2018-01-01	-0.994455	-0.629442	1.462	0.601052
2018-04-01	-1.39657	-0.0634255	1.45796	0.695395
2018-07-01	-2.20795	0.423124	1.45391	0.592841
2018-10-01	-1.9344	0.753728	1.44987	0.492443
2019-01-01	-1.85915	1.43012	1.44906	0.392887
2019-04-01	-2.87118	0.570395	1.44824	0.192546
2019-07-01	-2.80566	0.739418	1.44743	0.189552
2019-10-01	-2.90526	0.213388	1.44662	0.181913
2020-01-01	-2.32215	-1.06457	1.44329	-12.4325
2020-04-01	-1.45396	2.74779	1.43995	-2.35585
2020-07-01	-0.156929	2.13892	1.43662	-0.582639
2020-10-01	0.0590714	2.1408	1.43328	1.09416
2021-01-01	0.0784327	2.71953	1.42995	13.4819
2021-04-01	0.450422	1.44113	1.42661	3.18739
2021-07-01	0.548023	1.86025	1.42328	0.208794
2021-10-01	0.674458	1.94971	1.41994	-0.557566

## Sheet: south africa
Date	FSI	CA	CGD	OGAP
1998-01-01	2.50156	0.00833829	1.63067	0.00701805
1998-04-01	2.9034	-0.797865	1.62373	0.00424245
1998-07-01	1.62132	-2.52059	1.6168	-0.000103664
1998-10-01	0.995516	-2.58691	1.60986	-0.00309088
1999-01-01	2.4198	1.63616	1.60214	-0.00236056
1999-04-01	1.63577	-1.01319	1.59442	-0.00236473
1999-07-01	1.78869	-0.243527	1.58669	-0.00112242
1999-10-01	1.55075	-1.8341	1.57897	0.000125562
2000-01-01	1.72253	-0.327737	1.57941	0.00163873
2000-04-01	1.69587	0.340522	1.57986	0.00205036
2000-07-01	1.04248	-1.23408	1.5803	0.00273042
2000-10-01	2.31548	0.910796	1.56473	0.00277227
2001-01-01	1.42857	0.211185	1.54915	0.00175106
2001-04-01	-0.212364	1.28541	1.53358	0.000183045
2001-07-01	2.42556	-0.701395	1.51801	-0.00245626
2001-10-01	-0.00341205	0.329004	1.50244	-0.0029875
2002-01-01	0.293892	1.60327	1.50145	-0.00223049
2002-04-01	1.31032	0.579241	1.50047	-0.000768174
2002-07-01	-0.202434	0.622403	1.49949	2.29902e-05
2002-10-01	-0.306225	0.547203	1.49851	-0.000561646
2003-01-01	-0.230901	-0.1708	1.49578	-0.00208601
2003-04-01	-0.657129	-1.11722	1.49306	-0.00433485
2003-07-01	-0.310757	-0.263108	1.49033	-0.00644278
2003-10-01	-1.39096	-1.48645	1.48761	-0.00849532
2004-01-01	-0.73211	-1.30759	1.48367	-0.00660853
2004-04-01	-0.109067	-2.39628	1.47972	-0.00529645
2004-07-01	-1.02577	-3.03975	1.47578	-0.00302969
2004-10-01	-0.979178	-2.96396	1.47184	-0.00323748
2005-01-01	-0.980876	-2.31305	1.46578	-0.00369012
2005-04-01	-0.602156	-2.43836	1.45973	-0.000813253
2005-07-01	-0.737	-3.30102	1.45368	0.000243073
2005-10-01	-1.32313	-3.15652	1.44762	-0.00163881
2006-01-01	-0.995135	-4.62131	1.43224	0.00121818
2006-04-01	-0.891102	-2.70261	1.41685	0.0027316
2006-07-01	-0.887434	-3.06379	1.40146	0.00419916
2006-10-01	-0.657089	-5.68921	1.38607	0.0058186
2007-01-01	1.28954	-3.87741	1.38439	0.00863372
2007-04-01	0.346225	-4.40036	1.3827	0.00818082
2007-07-01	0.683942	-5.55375	1.38102	0.00943675
2007-10-01	3.00537	-5.86784	1.39107	0.0119436
2008-01-01	1.09812	-5.25306	1.40112	0.0103599
2008-04-01	-0.131659	-5.62502	1.41118	0.0124193
2008-07-01	-0.480306	-5.18863	1.42123	0.010425
2008-10-01	-0.51753	-4.12397	1.43128	0.00507349
2009-01-01	-1.08422	-4.1515	1.44695	-0.00447668
2009-04-01	-0.270381	-1.98671	1.46261	-0.00861133
2009-07-01	-0.620455	-1.18074	1.47828	-0.0101751
2009-10-01	-0.55827	-2.37227	1.49395	-0.009809
2010-01-01	-0.828388	-2.78956	1.50568	-0.00725954
2010-04-01	-0.818372	-1.61433	1.5174	-0.00609517
2010-07-01	-0.137856	-1.47805	1.52913	-0.00469535
2010-10-01	0.256641	0.133017	1.54086	-0.00310638
2011-01-01	-0.735212	-1.83362	1.54888	-0.00126937
2011-04-01	-0.15636	-1.42758	1.55691	-0.00124593
2011-07-01	-0.969104	-2.31837	1.56494	-0.0018306
2011-10-01	-0.616274	-2.15217	1.57296	-0.00122082
2012-01-01	-0.701837	-4.05937	1.5812	-0.0010845
2012-04-01	0.154563	-4.66445	1.58944	0.000246228
2012-07-01	-0.610011	-4.76157	1.59767	-0.000225021
2012-10-01	-0.524864	-5.22965	1.60591	-0.00033882
2013-01-01	-0.303517	-4.92514	1.61344	0.000898349
2013-04-01	-0.834453	-6.13962	1.62096	0.0019934
2013-07-01	-0.849129	-5.65607	1.62849	0.00207079
2013-10-01	-0.700929	-4.79894	1.63602	0.00250407
2014-01-01	-0.23623	-4.68457	1.64079	9.00829e-05
2014-04-01	-0.276207	-5.71812	1.64556	7.28609e-05
2014-07-01	-0.0613629	-3.99071	1.65033	0.000516294
2014-10-01	0.119826	-5.24278	1.65509	0.00220911
2015-01-01	-0.155047	-4.06238	1.66117	0.00388201
2015-04-01	-0.324913	-3.30023	1.66725	-0.00115828
2015-07-01	-0.352877	-4.28634	1.67333	-0.00047144
2015-10-01	-1.25965	-5.78823	1.67597	0.000234418
2016-01-01	-1.21588	-4.33452	1.67861	0.000189773
2016-04-01	-0.772301	-2.59834	1.68125	-0.000382264
2016-07-01	-0.568546	-2.6827	1.68389	-0.0013346
2016-10-01	-0.934685	-1.25249	1.68653	-0.0017758
2017-01-01	-1.34929	-2.51989	1.69322	-0.000450099
2017-04-01	-0.304042	-2.67316	1.69991	0.00128306
2017-07-01	-0.597303	-2.041	1.7066	0.00154521
2017-10-01	-0.693931	-2.57814	1.7133	0.0028081
2018-01-01	-0.709613	-3.76316	1.72244	0.00475111
2018-04-01	-0.553042	-3.2959	1.73158	0.00341302
2018-07-01	-0.813638	-2.61585	1.74072	0.00855149
2018-10-01	-0.787898	-2.28772	1.74987	0.00966478
2019-01-01	-0.0487767	-3.20432	1.77211	0.00583215
2019-04-01	1.29524	-3.23321	1.79436	0.00781806
2019-07-01	-0.0900683	-2.63337	1.8166	0.0083278
2019-10-01	0.27405	-1.13425	1.83885	0.00822416
2020-01-01	-0.208321	0.264891	1.83883	0.00926931
2020-04-01	-0.490973	-2.55647	1.83881	-0.0711246
2020-07-01	-0.23535	5.49038	1.8388	-0.0154091
2020-10-01	0.110562	3.23373	1.83878	-0.00393167
2021-01-01	0.223084	3.63109	1.83876	-0.00152608
2021-04-01	-0.0536881	4.48071	1.83875	0.00361752
2021-07-01	0.528111	4.16368	1.83873	-0.00513252
2021-10-01	1.05035	2.26396	1.83871	0.000201506
